# Supplementary material for: Database and new models based on a group contribution method to predict the refractive index of ionic liquids
Source: Royal Society of Chemistry journal article supplement (doi:10.1039/c7cp03214e), 2017-01-01
Supplement: c7cp03214e1.xlsx [file c7cp03214e1.xlsx]

## Sheet: Table S1
Table S1 Temperature and refractive index range as well as AARD % of the used ILs in this study.
No.	ILs	Temperature Range (K)	Data Points	AARD%		References
				(GCM)	(GC-ANN)
1	[MIM][OAc]	298.15	1	1.21	3.24	1
2	[C1MIM][TFSI]	298.15	2	0.4	0.05	2, 3
3	[DMIM][MeSO4]	298.15-328.15	8	0.07	0.25	4, 5
4	[EMIM]Cl	288.15-318.15	4	2.75	0.1	6
5	[EMIM][BF4]	283.15-363.15	32	0.98	0.16	7-12
6	[EMIM][TFSI]	283.15-368.15	41	0.39	0.08	2, 3, 7, 10, 11, 13-17
7	[EMIM][dca]	283.15-353.15	23	0.83	0.15	7, 11, 18
8	[EMIM][FSI]	283.15-353.15	15	0.14	0.05	11
9	[EMIM][C(CN)3]	283.15-313.15	4	0.64	0.13	19
10	[EMIM][mesy]	283.15-353.15	29	0.91	0.13	7, 11, 18, 20, 21
11	[EMIM][TfO]	288.37-312.91	12	1.94	0.15	2, 18, 22-24
12	[EMIM][Tos]	298.15-342.37	11	1.39	0.01	18
13	[EMIM][C8SO4]	283.15-313.15	4	0.35	0.2	20
14	[EMIM][MeSO4]	298.15	1	0.04	0.24	25
15	[EMIM][EtSO4]	283.15-353.15	41	0.36	0.27	11, 21, 26-40
16	[EMIM][C5H11O2S4]	298.15-333.2	5	0.32	0.04	41, 42
17	[EMIM][HSO4]	283.15-353.15	15	0.5	0.06	11
18	[EMIM][CHF2CF2SO3]	293.15-353.15	7	0.05	0.1	39
19	[EMIM][TPTP]	283.15-353.15	15	0.03	0	11
20	[EMIM][Me2PO4]	298.15-327.64	8	0.13	0.03	18
21	[EMIM]DEP]	294.15-313.2	7	0.67	0.41	31, 37, 38, 43
22	[EMIM][MeOHPO2]	283.15-317.82	12	0.09	0.05	18, 20
23	[EMIM][TA]	298.15	1	0.88	0.03	2
24	[EMIM][OAc]	283.15-353.15	39	1.33	0.13	18, 21, 43-46
25	[EMIM][Gly]	293.15-333.15	9	1.58	0.58	47
26	[EMIM][Ala]	293.15-333.15	9	0.52	0.13	47
27	[EMIM][Ser]	293.15-333.15	9	1.62	0.05	47
28	[EMIM][Pro]	293.15-333.15	9	0.35	0.04	47
29	[EMIM][SCN]	283.15-353.15	22	0.12	0.06	11, 18
30	[EMIM][B(CN)4]	283.15-353.15	15	0.34	0.07	11
31	[DEIM][TFSI]	298.15	1	0.09	0.07	2
32	[DEIM][TfO]	298.15	1	1.66	0	2
33	[C3MIM][BF4]	298.15-338.15	9	0.45	0.09	48
34	[C3MIM][TFSI]	293.15-343.15	14	0.63	0.43	15, 49-51
35	[C3MIM][MeSO4]	298.15-328.15	4	0.46	0.13	52
36	[BMIM]Cl	288.15-318.15	4	3.04	0.76	6
37	[BMIM]Br	298.15-308.15	4	4.89	4.52	53
38	[BMIM]I	298.15	1	0.22	2.18	54
39	[BMIM][ICl2]	298.15	2	1.46	1.49	55
40	[BMIM][Br3]	298.15	1	5.34	0.02	55
41	[BMIM][BF4]	293.15-343.15	59	0.14	0.25	2, 3, 7, 10, 12, 13, 56-64
42	[BMIM][TFSI]	298.15	13	0.13	0.15	2, 3, 10, 13, 15, 49, 65-67
43	[BMIM][dca]	288-308.15	3	0.59	0.05	68
44	[BMIM][C(CN)3]	283.15-313.15	4	0.82	0.04	19
45	[BMIM][TfO]	283.15-363.15	30	1.6	0.31	2, 8, 9, 13, 24, 56, 58, 68
46	[BMIM][NfO]	298.15	1	0.13	0.01	2
47	[BMIM][C8SO4]	298.15	2	0.82	0.15	59
48	[BMIM][MeSO4]	298.15-368.1	29	0.2	0.15	13, 17, 56, 69, 70
49	[BMIM][EtSO4]	298.15	1	0.22	0.14	71
50	[BMIM][PF6]	298.15-307.2	23	0.5	0.09	3, 13, 40, 56, 60, 72-77
51	[BMIM][OAc]	283.15-353.15	30	0.83	0.21	13, 44, 45
52	[BMIM][Gly]	298.15-313.15	4	0.44	0.3	78
53	[BMIM][Ala]	298.15-313.15	4	0.52	1.09	79
54	[BMIM][B(CN)4]	298.15-313.15	4	0.11	0.15	19
55	[C5MIM][BF4]	298.15-338.15	9	0.12	0.11	48
56	[C5MIM][TFSI]	298.15	1	0.15	0.09	15
57	[C5MIM][Glu]	293.15-328.15	8	0.47	0.1	80
58	[C4C2IM][TFSI]	298.15	1	0.12	0.06	2
59	[C4C2IM][TfO]	298.15	2	1.38	0.05	2, 24
60	[C4C2IM][NfO]	298.15	1	0.04	0.19	56
61	[C6MIM]Cl	288.15-318.15	5	0.45	2.23	6, 54
62	[C6MIM][BF4]	283.15-368.15	29	0.31	0.23	7, 10, 17, 48, 81
63	[C6MIM][TFSI]	298.15	8	0.25	0.12	10, 13, 15, 18, 51, 82, 83
64	[C6MIM][dca]	298.15	1	0.31	0.09	51
65	[C6MIM][C(CN)3]	283.15-313.15	8	1.09	0.04	19, 84
66	[C6MIM][TfO]	303.15	1	1.35	0	51
67	[C6MIM][PF6]	298.15-323.15	11	0.19	0.12	13, 85-87
68	[C6MIM][Glu]	293.15-328.15	8	0.6	0.06	80
69	[C7MIM][TFSI]	298.15	1	0.37	0.07	15
70	[C4C4IM][TFSI]	298.15-313.15	4	0.51	0.21	2820
71	[BzMIM]Cl	298.15-343.15	10	2.02	0.04	88
72	[BzMIM][MeSO4]	298.15-343.15	10	0.86	0.02	88
73	[C8MIM]Cl	288.15-318.15	5	0.9	0.54	6, 54
74	[C8MIM][BF4]	293.15-323.15	12	0.69	0.16	7, 10, 32, 59, 81
75	[C8MIM][TFSI]	298.15	8	0.45	0.05	10, 13, 15, 32, 89, 90
76	[C8MIM][C(CN)3]	283.15-313.15	4	1.29	0.07	19
77	[C8MIM][PF6]	298.15-323.15	12	0.62	0.09	13, 54, 85-87
78	[C8MIM][B(CN)4]	283.15-313.15	4	0.44	0.07	19
79	[C10MIM][BF4]	298.15	1	0.84	0.04	10
80	[C10MIM][TFSI]	298.15	4	0.7	0.05	10, 13, 18
81	[C10MIM][C(CN)3]	283.15-313.15	4	1.54	0.07	19
82	[C10MIM][B(CN)4]	283.15-313.15	4	0.55	0.07	19
83	[C12MIM][TFSI]	298.15	2	0.86	0.09	13
84	[C14MIM][TFSI]	298.15	2	0.68	0.54	13
85	[CC=Cmim]Cl	298.15	1	1.68	1.03	91
86	[C18(1[9])MIM][TFSI]	283.2-343.2	8	0.42	0.09	92
87	[C2CNBIM]Cl	293.15-333.15	9	0.3	0.05	93
88	[C2CNBIM]Br	298.15-333.15	8	1.42	0.5	94
89	[C2CNBIM][TfO]	298.15-333.15	9	3.85	0.08	95, 96
90	[C2CNBIM][DOSS]	298.15-333.15	9	0.32	0.02	95, 96
91	[C2CNBIM][DDS]	298.15-333.15	9	0.53	0.15	95, 96
92	[C2CNBIM][BS]	298.15-333.15	9	0.27	0.07	95, 96
93	[C2CNHIM]Br	298.15-333.15	8	0.39	0.05	94
94	[C2CNHIM][DOSS]	298.15-333.15	8	0.29	0.02	97
95	[C2CNHIM][DDS]	298.15-333.15	8	0.67	0.17	97
96	[C2CNHIM][BS]	298.15-333.15	8	0.62	0.05	97
97	[C2CNHIM][SBA]	298.15-333.15	8	1.55	0.05	97
98	[C2CNHIM][TFMS]	298.15-333.15	8	3.66	0.08	97
99	[C2CNOIM]Br	298.15-333.15	8	0.54	0.3	94
100	[CNC2OIM][TFMS]	298.15-333.15	8	3.47	0.05	98
101	[CNC2OIM][DOSS]	298.15-333.15	8	0.56	0.03	98
102	[CNC2OIM][DDS]	298.15-333.15	8	1.02	0.08	98
103	[CNC2OIM][BS]	298.15-333.15	8	0.94	0.09	98
104	[CNC2OIM][SBA]	298.15-333.15	8	1.68	0.1	98
105	[C2CNDIM]Br	308.15-333.15	6	0.78	0.08	94
106	[C2CNDIM][DOSS]	298.15-333.15	9	0.51	0.04	95, 96
107	[C2CNDIM][DDS]	298.15-333.15	9	1.3	0.32	95, 96
108	[C2CNDIM][SBA]	298.15-333.15	8	2.04	0.08	96
109	[AC4IM][dca]	298.15	1	0.07	0.11	60
110	[AC6IM][dca]	298.15	1	0.37	0.07	60
111	[AC8IM][dca]	298.15	1	0.61	0.05	60
112	[AC10IM][dca]	298.15	1	0.98	0.03	60
113	[AC12IM][dca]	298.15	1	1.22	0.13	60
114	[AC14IM][dca]	298.15	1	1.33	0.37	60
115	[AVIM][dca]	298.15	1	1.92	1.72	60
116	[VC8IM][dca]	298.15	1	1.66	0.05	60
117	[VC10IM][dca]	298.15	1	1.06	0.23	60
118	[6OHHIM]Cl	293.15-333.15	9	0.14	0.02	99
119	[6OHIMC1]Cl	293.15-333.15	9	0.2	0.06	99
120	[6OHIMC2]Cl	293.15-333.15	9	0.12	0.01	99
121	[6OHIMC4]Cl	293.15-333.15	9	0.02	0.11	99
122	02388-03001	283.2-343.2	8	0.14	0.07	92
123	02399-03001	293.2-343.2	7	0.16	0.15	92
124	[C2CNHEIM]Cl	293.15-333.15	9	1.32	0.03	93
125	[C2CNAIM]Cl	293.15-333.15	9	0.71	0.08	93
126	[E1M3,5IM][TFSI]	298.15	1	0.15	0.14	2
127	[EDMIM][TFSI]	298.15	2	0.03	0.04	2, 15
128	[C3DMIM]TFSI]	298.15	1	0.19	0.09	15
129	[BDMIM][TFSI]	298.15	2	0.72	0.59	3, 15
130	[C8DMIM][TFSI]	298.15	1	0.68	0	15
131	[C6DMIM][TFSI]	298.15	1	0.51	0.06	15
132	[EEMIM][TFSI]	298.15	1	0.05	0.05	2
133	[C5DMIM][TFSI]	298.15	1	0.43	0	15
134	[C7DMIM][TFSI]	298.15	1	0.6	0.04	15
135	[P13][TFSI]	283.15-353.15	27	1.79	0.06	11, 100
136	[P14][TFSI]	283.15-363.15	11	0.22	0.12	8, 9
137	[P14][dca]	288.15-343.15	17	0.15	0.03	68, 101
138	[P14][TfO]	298.15	1	0.37	4.15	24
139	[Pyrr][NO3]	298.15	1	1.26	0.01	102
140	[Pyrr][C7H15COO]	298.15	1	3.98	0.01	103
141	[C1C1CNPyr][TFSI]	293.15	1	0.4	0.43	104
142	[C1C2CNPyr][TFSI]	293.15	1	0.01	0.04	104
143	[C1C3CNPyr][TFSI]	293.15	1	0.34	0.08	104
144	[C1C5CNPyr][TFSI]	293.15	1	0.43	0.42	104
145	[PP13][TFSI]	288.15-353.15	14	0.49	0.04	105
146	[PP14][TFSI]	288.15-353.15	14	0.09	0.04	105
147	[C4py][BF4]	293.15-353.15	14	0.07	0.05	11, 106, 107
148	[C4py][TFSI]	298.15-353.15	14	0.06	0.09	83, 108
149	[C6py][BF4]	298.15	1	0.55	0.19	107
150	[C8py][TFSI]	293.15-333.15	10	0.13	0.09	83, 109
151	[C10py][TFSI]	293.15-333.15	9	0.21	0.04	83
152	[C12py][TFSI]	293.15-333.15	9	0.09	0.05	83
153	[C4M'py][BF4]	298.15	2	0.05	0.29	86, 107
154	[C4M'py][TFSI]	293.15-353.15	7	0.24	0.35	106
155	[C2py][TFSI]	288.15-338.15	21	0.52	0.02	110
156	[C2py][EtSO4]	298.15-343.15	11	0.71	0.04	111, 112
157	[C2mpy][TFSI]	298.15	1	0.09	1.62	113
158	[empy][EtSO4]	298.15-343.15	23	0.05	0.35	114-121
159	[bmpy][BF4]	298.15	1	0.05	0.59	107
160	[bmpy][TFSI]	288.15-353.15	14	0.55	0.14	105
161	[bmmpy][TFSI]	293.15	1	0.03	0.08	109
162	[bmmpy][dca]	293.15	1	0.04	0.38	109
163	[hmmpy][TFSI]	298.15	2	0.28	0.34	122, 123
164	[hemmpy][TFSI]	298.15-343.15	10	0.12	0.1	124
165	[C4M''Py][BF4]	288.15-338.15	24	0.61	0.11	107, 125, 126
166	[C3mpy][TFSI]	288.15-353.15	15	0.65	0.15	105, 113
167	[C1mpy][MeSO4]	293.15-343.15	11	0.34	0.08	127
168	[Mpy][MeSO4]	288.15-343.15	14	0.49	0.07	68, 127
169	[C3py][BF4]	283.15-338.15	27	0.14	0.02	128, 129
170	[Eepy][EtSO4]	293.15-343.15	11	0.4	0.15	127
171	[Empy][MeSO4]	293.15-343.15	11	0.76	0.4	127
172	[O3M5MPYR][TFSI]	293.15	1	0.14	0.36	109
173	[O3M5MPYR][dca]	293.15	1	0.52	0.02	109
174	[O3M5MPYR][SCN]	293.15	1	2.19	1.44	109
175	[O2M3M5MPYR]I	293.15	1	1.75	0.01	109
176	[O2M3M5MPYR][TFSI]	293.15	1	0.34	0.06	109
177	[B2M3MPYR][TFSI]	293.15	1	0.4	0.34	109
178	[B2M3MPYR][dca]	293.15	1	0.77	0.43	109
179	[B2M3MPYR][TfO]	293.15	1	0.95	0.47	109
180	[B2M5EPYR][TFSI]	293.15	1	0.01	0.02	109
181	[B2M3M5MPYR][TFSI]	293.15	1	0.05	0.16	109
182	[O2M3MPYR][TFSI]	293.15	1	0.17	0.05	109
183	[O2M3MPYR][TfO]	293.15	1	1.04	0.05	109
184	[O2M3MPYR][SCN]	293.15	1	1.7	1.91	109
185	[1E3M5M2PPy][TFSI]	298.15-343.15	10	0.22	0.03	124
186	[1B3M5M2PPy][TFSI]	298.15-343.15	10	0.2	0.05	124
187	[1H2M3M5MPy][TFSI]	298.15-343.15	10	0.47	0.29	124
188	[1H3M5M2PPy][TFSI]	298.15-343.15	10	0.25	0.06	124
189	[S222][TFSI]	283.15-353.15	15	0.11	0.03	130
190	[S221][TFSI]	283.15-353.15	15	0.12	0.06	130
191	[N1113][TFSI]	283.15-353.15	15	0.93	0.02	131
192	[N1114][TFSI]	283.15-353.15	16	0.69	0.12	3, 130
193	[N1222][TFSI]	283.15-353.15	15	0.67	0.04	131
194	[N112,1O2][BF4]	298.15	1	1.08	0.06	132
195	[N112,1O2][TFSI]	298.15	1	0.48	0.09	132
196	[N1116][TFSI]	283.15-353.15	15	0.3	0.04	131
197	[N8111][TFSI]	283.15-353.15	15	0.06	0.14	131
198	[N7222][TFSI]	298.15	3	0.81	0.09	133
199	[N444H][NO3]	298.15	1	1.09	1.95	2
200	[NHH33][SCN]	298.15	1	1.53	0.02	2
201	[NH222][HSO4]	298.15	1	2.67	0.13	134
202	[NH222][OAc]	298.15	1	2.45	3.49	134
203	[NHHH2][NO3]	298.15	2	0.74	0.04	2, 135
204	[NHHH2][HSO4]	298.15	1	0.88	1.32	135
205	[NHHH2][OAc]	298.15	1	1.2	2.02	136
206	[NHHH2][HCO2]	298.15	1	1.26	0.22	135
207	[NHHH2][DL-lactate]	298.15	1	0.08	0.4	135
208	[NHHH2][CH3CH2CO2]	298.15	1	1.1	0.02	135
209	[NHHH2][CH3(CH2)2CO2]	298.15	1	0.81	0.05	135
210	[NHHH2][CH2(OH)CO2]	298.15	1	0.63	0.03	135
211	[NHHH(CH2)2OH][NO3]	298.15	1	0.72	3.85	135
212	[NHHH(CH2)2OH][OAc]	298.15	2	0.23	0.87	135, 137
213	[NHHH(CH2)2OH][HCO2]	298.15	2	0.63	0.27	135, 137
214	[NHHH(CH2)2OH][DL-lactate]	298.15	2	0.11	0.09	135, 137
215	[NHHH(CH2)2OH][C2H5COO]	298.15	1	0.05	0.87	137
216	[N111,2OH][L-lactate]	293.15-323.15	7	0.26	0.02	138
217	[N111,2OH][Gly]	293.15-343.15	11	0.59	0.01	139
218	[N111,2OH][Ala]	293.15-353.15	22	0.63	0.6	139
219	[N111,2OH][Ser]	293.15-343.15	11	2.18	0.04	139
220	[N111,2OH][Pro]	293.15-343.15	11	0.27	0.01	139
221	[NHHH1][HCO2]	298.15	1	1.33	0.03	135
222	[NHHH3][NO3]	298.15	1	0.96	0.04	2
223	[NHHH3][OAc]	298.15	1	0.77	1.99	136
224	[NHHH4][NO3]	298.15	1	0.27	0.84	77
225	[NHHH4][HCO2]	298.15	1	0.68	0.15	135
226	[NHHH4][SCN]	298.15	1	0.06	5.14	2
227	[NHHH5][HCO2]	298.15	1	0.58	0.3	135
228	[NHHH,CH2CH(CH3)2][HCO2]	298.15	1	0.56	0.11	135
229	[NHHH,(CH2)2CH(CH3)2][HCO2]	298.15	1	0.35	0.11	135
230	[NHHH,CH2CH(OH)CH3][HCO2]	298.15	1	0.3	0.24	135
231	[N4441][TFSI]	283.15-353.15	15	0.67	0.07	130
232	[NH23'3'][OAc]	298.15	1	1.34	0.16	140
233	[NH23'3'][HCOO]	298.15	1	0.74	0.14	140
234	[NH23'3'][HF2]	298.15	1	1.68	0	140
235	[NH13'3'][OAc]	298.15	1	1.74	0.09	140
236	[NH13'3'][HCO2]	298.15	1	0.86	1.92	140
237	[NH13'3'][HF2]	298.15	1	2.49	0.52	140
238	[MTEOA][MeSO4]	298.15	1	0.72	6.73	141
239	[NHH1,EtOH][OAc]	298.15	1	1.33	0.21	142
240	[NHH1,EtOH][HCO2]	298.35	1	1.3	0.64	142
241	[NHH1,EtOH][CH3CH2CO2]	298.2	1	1.03	0.14	142
242	[NHH1,EtOH][CH3(CH2)2CO2]	298.15-313.15	1	0.93	0.22	142, 143
243	[NHH1,EtOH][(CH3)2CHCO2]	298.05	1	1.15	0.52	142
244	[NHH1,EtOH][CH3(CH2)3CO2]	298.19	1	0.98	0.47	142
245	[(Et)2N][HSO4]	298.15	1	3.49	0.27	134
246	[(Et)2N][OAc]	298.15	1	2.05	0.42	134
247	[NH111][HSO4]	298.15	1	4.99	7.31	134
248	[NH111][OAc]	298.15	1	5.24	3.1	134
249	[N11,1O1,1O2][BF4]	298.15	1	1.05	0.42	132
250	[N11,1O1,1O2][TFSI]	298.15	1	0.53	0.03	132
251	[N11,1O1,2O2][BF4]	298.15	1	0.88	0.39	132
252	[N11,1O1,2O2][TFSI]	298.15	1	0.54	0.16	132
253	[N11,1O2,1O2][BF4]	298.15	1	0.31	0.18	132
254	[N11,1O2,1O2][TFSI]	298.15	1	0.17	0.21	132
255	[N11,1O2,2O2][BF4]	298.15	1	0.24	0.12	132
256	[N11,1O2,2O2][TFSI]	298.15	1	0.18	0.07	132
257	[N11,2O2,2O2][BF4]	298.15	1	0.21	0.04	132
258	[N11,2O2,2O2][TFSI]	298.15	1	0.19	0.06	132
259	[N1115][TFSI]	283.15-353.15	15	0.48	0.03	131
260	[IBAC3S][HSO4]	293.15-333.15	9	1.74	0.78	144
261	[IBAC4S][HSO4]	293.15-333.15	9	0.16	0.62	144
262	[TMG][PhO]	298.15-343.15	10	0.32	0.03	145
263	[TMG][4-Me-PhO]	298.15-343.15	10	0.29	0.04	145
264	[TMG][4-MeO-PhO]	298.15-343.15	10	0.23	0.03	145
265	[TMG][4-F-PhO]	298.15-343.15	10	0.23	0.02	145
266	[P666,14]Cl	283.15-353.15	17	1.04	0.04	146-148
267	[P666,14]Br	283.15-353.15	16	0.88	0.02	58, 147
268	[P666,14][BF4]	295.15	1	2.8	0.09	146
269	[P666,14][TFSI]	283.15-348.15	17	2.03	0.39	13, 146, 147
270	[P666,14][dca]	283.15-353.15	16	0.66	0.03	146, 147
271	[P666,14][Sac]	295.15	1	0.91	5	146
272	[P666,14][mesy]	283.15-353.15	15	0.13	0.04	147
273	[P666,14][TfO]	295.15-298.15	3	0.37	0.12	13, 146
274	17004-05029	283.15-353.15	16	0.76	0.01	147, 148
275	[P666,14][OAc]	298.15	2	0.78	0.38	13
276	[P666,14][C8CO2]	283.15-353.15	15	0.16	0.03	147
277	[P8888][TFSI]	295.15	1	6.04	3.54	146
278	[P4441][MeSO4]	293.15-343.15	11	0.36	0.04	149
279	[P4442][DEP]	293.15-343.15	12	0.87	0.04	146, 149
280	[C12(P333)2][TFSI]	295.15	1	0.2	0.01	146
281	[PEG3(P333)2][TFSI]	295.15	1	0.2	7.32	146
282	[P4448]Cl	293.15-343.15	11	0.44	0.04	149
283	[GluC3][C12SO4]	288.15-343.15	12	0.34	0.01	150
284	[GlyC3][C12SO4]	303.15-343.15	9	0.37	0.15	150
285	[GlyC4][C12SO4]	303.15-343.15	9	0.34	0.2	150
286	[AlaC3][C12SO4]	288.15-343.15	12	0.17	0.1	150
287	[AlaC4][C12SO4]	288.15-343.15	12	0.24	0.12	150
288	[GluC4][C12SO4]	323.15-343.15	5	0.3	0.06	150
289	[ProC3][C12SO4]	288.15-343.15	12	0.62	0.05	150
290	[ProC4][C12SO4]	288.15-343.15	12	0.43	0.14	150
291	[ValC3][C12SO4]	288.15-343.15	12	0.07	0.01	150
292	[ValC4][C12SO4]	288.15-343.15	12	0.11	0.16	150
293	[Phpz1][mesy]	298.15-333.15	4	0.06	0.02	151
294	[Phpz4][mesy]	298.15-333.15	4	0.21	0.06	151
295	[Phpz5][BF4]	298.15-333.15	4	0.86	0.1	151
296	[Phpz5][mesy]	298.15-333.15	4	0.34	0.03	151
297	[Phpz6][BF4]	298.15-333.15	4	1.09	0.03	151
298	[Phpz6][mesy]	298.15-333.15	4	0.51	0.04	151
299	[Phpz7][mesy]	298.15-333.15	4	0.56	0.02	151

## Sheet: Table S2
Table S2 The detailed information of each ILs											cation center									anion											substitutes
											1	2	3	4	5	6	7	8	9	10	11	12	13	14	15	16	17	18	19	20	21	22	23	24	25	26	27	28	29	30	31	32	33	34	35	36	37	38	39
ref. No.	Np.	ID Code	Cation	Anion	Abbreviation	Name	Formula	T/K	nD	Subset										[BF4]-	[PF6]-	[Cl]- or Cl	[Br]- or Br	[I]- or I	[NO3]-	－CN		－P=O			－CH3	－CH2－	＞CH－ [－CH－]-	＞C＜ [＞C－]-	＝CH2	＝CH－	＝C＜	-H(ring)	－O－ [－O]-	＝O	－OH	-H(non-ring)	－S [－S－]-		[-N-]- ＞N－	-NH2	C=O	－CF2－	-CF3
1	1	01001-06003	MIM	OAc	[MIM][OAc]	1-methylimidazolium acetate	C6H10N2O2	298.15	1.4592	train	1																				2							4	1								1
2	2	02001-03001	C1MIm	TFSI	[C1MIM][TFSI]	1,3-dimethylimidazolium bis((trifluoromethyl)sulfonyl)imide	C7H9F6N3O4S2	298.15	1.422	train	1																2				2							3							1				2
3	3	02001-03001	C1MIm	TFSI	[C1MIM][TFSI]	1,3-dimethylimidazolium bis((trifluoromethyl)sulfonyl)imide	C7H9F6N3O4S2	298	1.422	train	1																2				2							3							1				2
4	4	02002-04017	DMIM	MeSO4	[DMIM][MeSO4]	1,2-dimethylimidazolium methylsulfate	C6H12N2O4S	298.15	1.481	train	1																1				3							3	2
4	5	02002-04017	DMIM	MeSO4	[DMIM][MeSO4]	1,2-dimethylimidazolium methylsulfate	C6H12N2O4S	308.15	1.4782	test	1																1				3							3	2
4	6	02002-04017	DMIM	MeSO4	[DMIM][MeSO4]	1,2-dimethylimidazolium methylsulfate	C6H12N2O4S	318.15	1.475	train	1																1				3							3	2
4	7	02002-04017	DMIM	MeSO4	[DMIM][MeSO4]	1,2-dimethylimidazolium methylsulfate	C6H12N2O4S	328.15	1.4732	train	1																1				3							3	2
5	8	02002-04017	DMIM	MeSO4	[DMIM][MeSO4]	1,2-dimethylimidazolium methylsulfate	C6H12N2O4S	298.15	1.4827	train	1																1				3							3	2
5	9	02002-04017	DMIM	MeSO4	[DMIM][MeSO4]	1,2-dimethylimidazolium methylsulfate	C6H12N2O4S	308.15	1.47999	train	1																1				3							3	2
5	10	02002-04017	DMIM	MeSO4	[DMIM][MeSO4]	1,2-dimethylimidazolium methylsulfate	C6H12N2O4S	318.15	1.47726	test	1																1				3							3	2
5	11	02002-04017	DMIM	MeSO4	[DMIM][MeSO4]	1,2-dimethylimidazolium methylsulfate	C6H12N2O4S	328.15	1.47421	train	1																1				3							3	2
6	12	02003-01001	EMIM or C2MIm	Cl	[EMIM]Cl	1-ethyl-3-ethylimidazolium chloride	C6H11ClN2	288.15	1.46942	train	1											1									2	1						3
6	13	02003-01001	EMIM or C2MIm	Cl	[EMIM]Cl	1-ethyl-3-methylimidazolium chloride	C6H11ClN2	298.15	1.46536	train	1											1									2	1						3
6	14	02003-01001	EMIM or C2MIm	Cl	[EMIM]Cl	1-ethyl-3-methylimidazolium chloride	C6H11ClN2	308.15	1.46102	train	1											1									2	1						3
6	15	02003-01001	EMIM or C2MIm	Cl	[EMIM]Cl	1-ethyl-3-methylimidazolium chloride	C6H11ClN2	318.15	1.45679	test	1											1									2	1						3
7	16	02003-02001	EMIM or C2MIm	BF4	[EMIM][BF4]	1-ethyl-3-methylimidazolium tetrafluoroborate	C6H11BF4N2	293.15	1.4117	train	1									1											2	1						3
8	17	02003-02001	EMIM or C2MIm	BF4	[EMIM][BF4]	1-ethyl-3-methylimidazolium tetrafluoroborate	C6H11BF4N2	298.15	1.4052	train	1									1											2	1						3
8	18	02003-02001	EMIM or C2MIm	BF4	[EMIM][BF4]	1-ethyl-3-methylimidazolium tetrafluoroborate	C6H11BF4N2	283.15	1.4085	train	1									1											2	1						3
8	19	02003-02001	EMIM or C2MIm	BF4	[EMIM][BF4]	1-ethyl-3-methylimidazolium tetrafluoroborate	C6H11BF4N2	293.15	1.4072	train	1									1											2	1						3
8	20	02003-02001	EMIM or C2MIm	BF4	[EMIM][BF4]	1-ethyl-3-methylimidazolium tetrafluoroborate	C6H11BF4N2	303.15	1.4051	test	1									1											2	1						3
8	21	02003-02001	EMIM or C2MIm	BF4	[EMIM][BF4]	1-ethyl-3-methylimidazolium tetrafluoroborate	C6H11BF4N2	313.15	1.4026	train	1									1											2	1						3
8	22	02003-02001	EMIM or C2MIm	BF4	[EMIM][BF4]	1-ethyl-3-methylimidazolium tetrafluoroborate	C6H11BF4N2	323.15	1.4003	train	1									1											2	1						3
8	23	02003-02001	EMIM or C2MIm	BF4	[EMIM][BF4]	1-ethyl-3-methylimidazolium tetrafluoroborate	C6H11BF4N2	333.15	1.3989	train	1									1											2	1						3
8	24	02003-02001	EMIM or C2MIm	BF4	[EMIM][BF4]	1-ethyl-3-methylimidazolium tetrafluoroborate	C6H11BF4N2	343.15	1.3966	train	1									1											2	1						3
8	25	02003-02001	EMIM or C2MIm	BF4	[EMIM][BF4]	1-ethyl-3-methylimidazolium tetrafluoroborate	C6H11BF4N2	353.15	1.3933	test	1									1											2	1						3
8	26	02003-02001	EMIM or C2MIm	BF4	[EMIM][BF4]	1-ethyl-3-methylimidazolium tetrafluoroborate	C6H11BF4N2	363.15	1.3915	train	1									1											2	1						3
9	27	02003-02001	EMIM or C2MIm	BF4	[EMIM][BF4]	1-ethyl-3-methylimidazolium tetrafluoroborate	C6H11BF4N2	293.15	1.4072	train	1									1											2	1						3
10	28	02003-02001	EMIM or C2MIm	BF4	[EMIM][BF4]	1-ethyl-3-methylimidazolium tetrafluoroborate	C6H11BF4N2	298.15	1.409	train	1									1											2	1						3
11	29	02003-02001	EMIM or C2MIm	BF4	[EMIM][BF4]	1-ethyl-3-methylimidazolium tetrafluoroborate	C6H11BF4N2	283	1.41546	train	1									1											2	1						3
11	30	02003-02001	EMIM or C2MIm	BF4	[EMIM][BF4]	1-ethyl-3-methylimidazolium tetrafluoroborate	C6H11BF4N2	288	1.41423	test	1									1											2	1						3
11	31	02003-02001	EMIM or C2MIm	BF4	[EMIM][BF4]	1-ethyl-3-methylimidazolium tetrafluoroborate	C6H11BF4N2	293	1.413	train	1									1											2	1						3
11	32	02003-02001	EMIM or C2MIm	BF4	[EMIM][BF4]	1-ethyl-3-methylimidazolium tetrafluoroborate	C6H11BF4N2	298	1.41177	train	1									1											2	1						3
11	33	02003-02001	EMIM or C2MIm	BF4	[EMIM][BF4]	1-ethyl-3-methylimidazolium tetrafluoroborate	C6H11BF4N2	303	1.41055	train	1									1											2	1						3
11	34	02003-02001	EMIM or C2MIm	BF4	[EMIM][BF4]	1-ethyl-3-methylimidazolium tetrafluoroborate	C6H11BF4N2	308	1.40934	train	1									1											2	1						3
11	35	02003-02001	EMIM or C2MIm	BF4	[EMIM][BF4]	1-ethyl-3-methylimidazolium tetrafluoroborate	C6H11BF4N2	313	1.4081	test	1									1											2	1						3
11	36	02003-02001	EMIM or C2MIm	BF4	[EMIM][BF4]	1-ethyl-3-methylimidazolium tetrafluoroborate	C6H11BF4N2	318	1.4069	train	1									1											2	1						3
11	37	02003-02001	EMIM or C2MIm	BF4	[EMIM][BF4]	1-ethyl-3-methylimidazolium tetrafluoroborate	C6H11BF4N2	323	1.4057	train	1									1											2	1						3
11	38	02003-02001	EMIM or C2MIm	BF4	[EMIM][BF4]	1-ethyl-3-methylimidazolium tetrafluoroborate	C6H11BF4N2	328	1.40452	train	1									1											2	1						3
11	39	02003-02001	EMIM or C2MIm	BF4	[EMIM][BF4]	1-ethyl-3-methylimidazolium tetrafluoroborate	C6H11BF4N2	333	1.40327	train	1									1											2	1						3
11	40	02003-02001	EMIM or C2MIm	BF4	[EMIM][BF4]	1-ethyl-3-methylimidazolium tetrafluoroborate	C6H11BF4N2	338	1.40211	test	1									1											2	1						3
11	41	02003-02001	EMIM or C2MIm	BF4	[EMIM][BF4]	1-ethyl-3-methylimidazolium tetrafluoroborate	C6H11BF4N2	343	1.40093	train	1									1											2	1						3
11	42	02003-02001	EMIM or C2MIm	BF4	[EMIM][BF4]	1-ethyl-3-methylimidazolium tetrafluoroborate	C6H11BF4N2	348	1.39975	train	1									1											2	1						3
11	43	02003-02001	EMIM or C2MIm	BF4	[EMIM][BF4]	1-ethyl-3-methylimidazolium tetrafluoroborate	C6H11BF4N2	353	1.39858	train	1									1											2	1						3
12	44	02003-02001	EMIM or C2MIm	BF4	[EMIM][BF4]	1-ethyl-3-methylimidazolium tetrafluoroborate	C6H11BF4N2	298.15	1.4111	train	1									1											2	1						3
12	45	02003-02001	EMIM or C2MIm	BF4	[EMIM][BF4]	1-ethyl-3-methylimidazolium tetrafluoroborate	C6H11BF4N2	303.15	1.41	test	1									1											2	1						3
12	46	02003-02001	EMIM or C2MIm	BF4	[EMIM][BF4]	1-ethyl-3-methylimidazolium tetrafluoroborate	C6H11BF4N2	313.15	1.4073	train	1									1											2	1						3
12	47	02003-02001	EMIM or C2MIm	BF4	[EMIM][BF4]	1-ethyl-3-methylimidazolium tetrafluoroborate	C6H11BF4N2	323.15	1.4051	train	1									1											2	1						3
2	48	02003-03001	EMIM or C2MIm	TFSI	[EMIM][TFSI]	1-ethyl-3-methylimidazolium bis[(trifluoromethyl)sulfonyl]amide	C8H11F6N3O4S2	298.15	1.4231	train	1																2				2	1						3							1				2
13	49	02003-03001	EMIM or C2MIm	TFSI	[EMIM][TFSI]	1-ethyl-3-methylimidazolium bis[(trifluoromethyl)sulfonyl]amide	C8H11F6N3O4S2	298	1.4225	train	1																2				2	1						3							1				2
7	50	02003-03001	EMIM or C2MIm	TFSI	[EMIM][TFSI]	1-ethyl-3-methylimidazolium bis[(trifluoromethyl)sulfonyl]amide	C8H11F6N3O4S2	293.15	1.4227	test	1																2				2	1						3							1				2
13	51	02003-03001	EMIM or C2MIm	TFSI	[EMIM][TFSI]	1-ethyl-3-methylimidazolium bis[(trifluoromethyl)sulfonyl]amide	C8H11F6N3O4S2	298	1.4225	train	1																2				2	1						3							1				2
10	52	02003-03001	EMIM or C2MIm	TFSI	[EMIM][TFSI]	1-ethyl-3-methylimidazolium bis[(trifluoromethyl)sulfonyl]amide	C8H11F6N3O4S2	298.15	1.42	train	1																2				2	1						3							1				2
3	53	02003-03001	EMIM or C2MIm	TFSI	[EMIM][TFSI]	1-ethyl-3-methylimidazolium bis[(trifluoromethyl)sulfonyl]amide	C8H11F6N3O4S2	298	1.4231	train	1																2				2	1						3							1				2
14	54	02003-03001	EMIM or C2MIm	TFSI	[EMIM][TFSI]	1-ethyl-3-methylimidazolium bis[(trifluoromethyl)sulfonyl]amide	C8H11F6N3O4S2	298.15	1.42298	train	1																2				2	1						3							1				2
11	55	02003-03001	EMIM or C2MIm	TFSI	[EMIM][TFSI]	1-ethyl-3-methylimidazolium bis[(trifluoromethyl)sulfonyl]amide	C8H11F6N3O4S2	283	1.42738	test	1																2				2	1						3							1				2
11	56	02003-03001	EMIM or C2MIm	TFSI	[EMIM][TFSI]	1-ethyl-3-methylimidazolium bis[(trifluoromethyl)sulfonyl]amide	C8H11F6N3O4S2	288	1.42594	train	1																2				2	1						3							1				2
11	57	02003-03001	EMIM or C2MIm	TFSI	[EMIM][TFSI]	1-ethyl-3-methylimidazolium bis[(trifluoromethyl)sulfonyl]amide	C8H11F6N3O4S2	293	1.42451	train	1																2				2	1						3							1				2
11	58	02003-03001	EMIM or C2MIm	TFSI	[EMIM][TFSI]	1-ethyl-3-methylimidazolium bis[(trifluoromethyl)sulfonyl]amide	C8H11F6N3O4S2	298	1.42309	train	1																2				2	1						3							1				2
11	59	02003-03001	EMIM or C2MIm	TFSI	[EMIM][TFSI]	1-ethyl-3-methylimidazolium bis[(trifluoromethyl)sulfonyl]amide	C8H11F6N3O4S2	303	1.42166	train	1																2				2	1						3							1				2
11	60	02003-03001	EMIM or C2MIm	TFSI	[EMIM][TFSI]	1-ethyl-3-methylimidazolium bis[(trifluoromethyl)sulfonyl]amide	C8H11F6N3O4S2	308	1.42022	test	1																2				2	1						3							1				2
11	61	02003-03001	EMIM or C2MIm	TFSI	[EMIM][TFSI]	1-ethyl-3-methylimidazolium bis[(trifluoromethyl)sulfonyl]amide	C8H11F6N3O4S2	313	1.41881	train	1																2				2	1						3							1				2
11	62	02003-03001	EMIM or C2MIm	TFSI	[EMIM][TFSI]	1-ethyl-3-methylimidazolium bis[(trifluoromethyl)sulfonyl]amide	C8H11F6N3O4S2	318	1.4174	train	1																2				2	1						3							1				2
11	63	02003-03001	EMIM or C2MIm	TFSI	[EMIM][TFSI]	1-ethyl-3-methylimidazolium bis[(trifluoromethyl)sulfonyl]amide	C8H11F6N3O4S2	323	1.41597	train	1																2				2	1						3							1				2
11	64	02003-03001	EMIM or C2MIm	TFSI	[EMIM][TFSI]	1-ethyl-3-methylimidazolium bis[(trifluoromethyl)sulfonyl]amide	C8H11F6N3O4S2	328	1.41458	train	1																2				2	1						3							1				2
11	65	02003-03001	EMIM or C2MIm	TFSI	[EMIM][TFSI]	1-ethyl-3-methylimidazolium bis[(trifluoromethyl)sulfonyl]amide	C8H11F6N3O4S2	333	1.41319	test	1																2				2	1						3							1				2
11	66	02003-03001	EMIM or C2MIm	TFSI	[EMIM][TFSI]	1-ethyl-3-methylimidazolium bis[(trifluoromethyl)sulfonyl]amide	C8H11F6N3O4S2	338	1.41177	train	1																2				2	1						3							1				2
11	67	02003-03001	EMIM or C2MIm	TFSI	[EMIM][TFSI]	1-ethyl-3-methylimidazolium bis[(trifluoromethyl)sulfonyl]amide	C8H11F6N3O4S2	343	1.41037	train	1																2				2	1						3							1				2
11	68	02003-03001	EMIM or C2MIm	TFSI	[EMIM][TFSI]	1-ethyl-3-methylimidazolium bis[(trifluoromethyl)sulfonyl]amide	C8H11F6N3O4S2	348	1.40902	train	1																2				2	1						3							1				2
11	69	02003-03001	EMIM or C2MIm	TFSI	[EMIM][TFSI]	1-ethyl-3-methylimidazolium bis[(trifluoromethyl)sulfonyl]amide	C8H11F6N3O4S2	353	1.4076	train	1																2				2	1						3							1				2
17	70	02003-03001	EMIM or C2MIm	TFSI	[EMIM][TFSI]	1-ethyl-3-methylimidazolium bis[(trifluoromethyl)sulfonyl]imide	C8H11F6N3O4S2	283	1.4254	test	1																2				2	1						3							1				2
17	71	02003-03001	EMIM or C2MIm	TFSI	[EMIM][TFSI]	1-ethyl-3-methylimidazolium bis[(trifluoromethyl)sulfonyl]imide	C8H11F6N3O4S2	293	1.4232	train	1																2				2	1						3							1				2
17	72	02003-03001	EMIM or C2MIm	TFSI	[EMIM][TFSI]	1-ethyl-3-methylimidazolium bis[(trifluoromethyl)sulfonyl]imide	C8H11F6N3O4S2	298.1	1.422	train	1																2				2	1						3							1				2
17	73	02003-03001	EMIM or C2MIm	TFSI	[EMIM][TFSI]	1-ethyl-3-methylimidazolium bis[(trifluoromethyl)sulfonyl]imide	C8H11F6N3O4S2	303	1.4206	train	1																2				2	1						3							1				2
17	74	02003-03001	EMIM or C2MIm	TFSI	[EMIM][TFSI]	1-ethyl-3-methylimidazolium bis[(trifluoromethyl)sulfonyl]imide	C8H11F6N3O4S2	313	1.4179	train	1																2				2	1						3							1				2
17	75	02003-03001	EMIM or C2MIm	TFSI	[EMIM][TFSI]	1-ethyl-3-methylimidazolium bis[(trifluoromethyl)sulfonyl]imide	C8H11F6N3O4S2	323	1.4153	test	1																2				2	1						3							1				2
17	76	02003-03001	EMIM or C2MIm	TFSI	[EMIM][TFSI]	1-ethyl-3-methylimidazolium bis[(trifluoromethyl)sulfonyl]imide	C8H11F6N3O4S2	333	1.4127	train	1																2				2	1						3							1				2
17	77	02003-03001	EMIM or C2MIm	TFSI	[EMIM][TFSI]	1-ethyl-3-methylimidazolium bis[(trifluoromethyl)sulfonyl]imide	C8H11F6N3O4S2	343	1.4101	train	1																2				2	1						3							1				2
17	78	02003-03001	EMIM or C2MIm	TFSI	[EMIM][TFSI]	1-ethyl-3-methylimidazolium bis[(trifluoromethyl)sulfonyl]imide	C8H11F6N3O4S2	353	1.4072	train	1																2				2	1						3							1				2
17	79	02003-03001	EMIM or C2MIm	TFSI	[EMIM][TFSI]	1-ethyl-3-methylimidazolium bis[(trifluoromethyl)sulfonyl]imide	C8H11F6N3O4S2	363	1.4045	train	1																2				2	1						3							1				2
17	80	02003-03001	EMIM or C2MIm	TFSI	[EMIM][TFSI]	1-ethyl-3-methylimidazolium bis[(trifluoromethyl)sulfonyl]imide	C8H11F6N3O4S2	368.1	1.4033	test	1																2				2	1						3							1				2
15	81	02003-03001	EMIM or C2MIm	TFSI	[EMIM][TFSI]	1-ethyl-3-methylimidazolium bis[(trifluoromethyl)sulfonyl]imide	C8H11F6N3O4S2	298.15	1.4231	train	1																2				2	1						3							1				2
16	82	02003-03001	EMIM or C2MIm	TFSI	[EMIM][TFSI]	1-ethyl-3-methylimidazolium bis[(trifluoromethyl)sulfonyl]imide	C8H11F6N3O4S2	293.15	1.42425	train	1																2				2	1						3							1				2
16	83	02003-03001	EMIM or C2MIm	TFSI	[EMIM][TFSI]	1-ethyl-3-methylimidazolium bis[(trifluoromethyl)sulfonyl]imide	C8H11F6N3O4S2	298.15	1.42286	train	1																2				2	1						3							1				2
16	84	02003-03001	EMIM or C2MIm	TFSI	[EMIM][TFSI]	1-ethyl-3-methylimidazolium bis[(trifluoromethyl)sulfonyl]imide	C8H11F6N3O4S2	303.15	1.42142	train	1																2				2	1						3							1				2
16	85	02003-03001	EMIM or C2MIm	TFSI	[EMIM][TFSI]	1-ethyl-3-methylimidazolium bis[(trifluoromethyl)sulfonyl]imide	C8H11F6N3O4S2	308.15	1.41997	test	1																2				2	1						3							1				2
16	86	02003-03001	EMIM or C2MIm	TFSI	[EMIM][TFSI]	1-ethyl-3-methylimidazolium bis[(trifluoromethyl)sulfonyl]imide	C8H11F6N3O4S2	313.15	1.4185	train	1																2				2	1						3							1				2
16	87	02003-03001	EMIM or C2MIm	TFSI	[EMIM][TFSI]	1-ethyl-3-methylimidazolium bis[(trifluoromethyl)sulfonyl]imide	C8H11F6N3O4S2	318.15	1.41705	train	1																2				2	1						3							1				2
16	88	02003-03001	EMIM or C2MIm	TFSI	[EMIM][TFSI]	1-ethyl-3-methylimidazolium bis[(trifluoromethyl)sulfonyl]imide	C8H11F6N3O4S2	323.15	1.41555	train	1																2				2	1						3							1				2
7	89	02003-03004	EMIM or C2MIm	dca	[EMIM][dca]	1-ethyl-3-methylimidazolium dicyanamide	C8H11N5	293.15	1.5307	train	1															2					2	1						3							1
18	90	02003-03004	EMIM or C2MIm	dca	[EMIM][dca]	1-ethyl-3-methylimidazolium dicyanamide	C8H11N5	288.37	1.51745	test	1															2					2	1						3							1
18	91	02003-03004	EMIM or C2MIm	dca	[EMIM][dca]	1-ethyl-3-methylimidazolium dicyanamide	C8H11N5	293.28	1.51585	train	1															2					2	1						3							1
18	92	02003-03004	EMIM or C2MIm	dca	[EMIM][dca]	1-ethyl-3-methylimidazolium dicyanamide	C8H11N5	298.19	1.51428	train	1															2					2	1						3							1
18	93	02003-03004	EMIM or C2MIm	dca	[EMIM][dca]	1-ethyl-3-methylimidazolium dicyanamide	C8H11N5	303.1	1.51269	train	1															2					2	1						3							1
18	94	02003-03004	EMIM or C2MIm	dca	[EMIM][dca]	1-ethyl-3-methylimidazolium dicyanamide	C8H11N5	308.01	1.51112	train	1															2					2	1						3							1
18	95	02003-03004	EMIM or C2MIm	dca	[EMIM][dca]	1-ethyl-3-methylimidazolium dicyanamide	C8H11N5	312.91	1.50956	test	1															2					2	1						3							1
18	96	02003-03004	EMIM or C2MIm	dca	[EMIM][dca]	1-ethyl-3-methylimidazolium dicyanamide	C8H11N5	298.15	1.51429	train	1															2					2	1						3							1
11	97	02003-03004	EMIM or C2MIm	dca	[EMIM][dca]	1-ethyl-3-methylimidazolium dicyanamide	C8H11N5	283	1.51774	train	1															2					2	1						3							1
11	98	02003-03004	EMIM or C2MIm	dca	[EMIM][dca]	1-ethyl-3-methylimidazolium dicyanamide	C8H11N5	288	1.51605	train	1															2					2	1						3							1
11	99	02003-03004	EMIM or C2MIm	dca	[EMIM][dca]	1-ethyl-3-methylimidazolium dicyanamide	C8H11N5	293	1.51441	train	1															2					2	1						3							1
11	100	02003-03004	EMIM or C2MIm	dca	[EMIM][dca]	1-ethyl-3-methylimidazolium dicyanamide	C8H11N5	298	1.51278	test	1															2					2	1						3							1
11	101	02003-03004	EMIM or C2MIm	dca	[EMIM][dca]	1-ethyl-3-methylimidazolium dicyanamide	C8H11N5	303	1.51121	train	1															2					2	1						3							1
11	102	02003-03004	EMIM or C2MIm	dca	[EMIM][dca]	1-ethyl-3-methylimidazolium dicyanamide	C8H11N5	308	1.50963	train	1															2					2	1						3							1
11	103	02003-03004	EMIM or C2MIm	dca	[EMIM][dca]	1-ethyl-3-methylimidazolium dicyanamide	C8H11N5	313	1.50808	train	1															2					2	1						3							1
11	104	02003-03004	EMIM or C2MIm	dca	[EMIM][dca]	1-ethyl-3-methylimidazolium dicyanamide	C8H11N5	318	1.50655	train	1															2					2	1						3							1
11	105	02003-03004	EMIM or C2MIm	dca	[EMIM][dca]	1-ethyl-3-methylimidazolium dicyanamide	C8H11N5	323	1.50502	test	1															2					2	1						3							1
11	106	02003-03004	EMIM or C2MIm	dca	[EMIM][dca]	1-ethyl-3-methylimidazolium dicyanamide	C8H11N5	328	1.50351	train	1															2					2	1						3							1
11	107	02003-03004	EMIM or C2MIm	dca	[EMIM][dca]	1-ethyl-3-methylimidazolium dicyanamide	C8H11N5	333	1.50191	train	1															2					2	1						3							1
11	108	02003-03004	EMIM or C2MIm	dca	[EMIM][dca]	1-ethyl-3-methylimidazolium dicyanamide	C8H11N5	338	1.5003	train	1															2					2	1						3							1
11	109	02003-03004	EMIM or C2MIm	dca	[EMIM][dca]	1-ethyl-3-methylimidazolium dicyanamide	C8H11N5	343	1.49865	train	1															2					2	1						3							1
11	110	02003-03004	EMIM or C2MIm	dca	[EMIM][dca]	1-ethyl-3-methylimidazolium dicyanamide	C8H11N5	348	1.49708	test	1															2					2	1						3							1
11	111	02003-03004	EMIM or C2MIm	dca	[EMIM][dca]	1-ethyl-3-methylimidazolium dicyanamide	C8H11N5	353	1.49557	train	1															2					2	1						3							1
11	112	02003-03017	EMIM or C2MIm	FSI	[EMIM][FSI]	1-ethyl-3-methylimidazolium imidodisulfurylfluoride	C6H11F2N3O4S2	283	1.45179	train	1																2				2	1						3							1
11	113	02003-03017	EMIM or C2MIm	FSI	[EMIM][FSI]	1-ethyl-3-methylimidazolium imidodisulfurylfluoride	C6H11F2N3O4S2	288	1.45035	train	1																2				2	1						3							1
11	114	02003-03017	EMIM or C2MIm	FSI	[EMIM][FSI]	1-ethyl-3-methylimidazolium imidodisulfurylfluoride	C6H11F2N3O4S2	293	1.44891	train	1																2				2	1						3							1
11	115	02003-03017	EMIM or C2MIm	FSI	[EMIM][FSI]	1-ethyl-3-methylimidazolium imidodisulfurylfluoride	C6H11F2N3O4S2	298	1.44747	test	1																2				2	1						3							1
11	116	02003-03017	EMIM or C2MIm	FSI	[EMIM][FSI]	1-ethyl-3-methylimidazolium imidodisulfurylfluoride	C6H11F2N3O4S2	303	1.44605	train	1																2				2	1						3							1
11	117	02003-03017	EMIM or C2MIm	FSI	[EMIM][FSI]	1-ethyl-3-methylimidazolium imidodisulfurylfluoride	C6H11F2N3O4S2	308	1.44462	train	1																2				2	1						3							1
11	118	02003-03017	EMIM or C2MIm	FSI	[EMIM][FSI]	1-ethyl-3-methylimidazolium imidodisulfurylfluoride	C6H11F2N3O4S2	313	1.4432	train	1																2				2	1						3							1
11	119	02003-03017	EMIM or C2MIm	FSI	[EMIM][FSI]	1-ethyl-3-methylimidazolium imidodisulfurylfluoride	C6H11F2N3O4S2	318	1.44179	train	1																2				2	1						3							1
11	120	02003-03017	EMIM or C2MIm	FSI	[EMIM][FSI]	1-ethyl-3-methylimidazolium imidodisulfurylfluoride	C6H11F2N3O4S2	323	1.44039	test	1																2				2	1						3							1
11	121	02003-03017	EMIM or C2MIm	FSI	[EMIM][FSI]	1-ethyl-3-methylimidazolium imidodisulfurylfluoride	C6H11F2N3O4S2	328	1.43899	train	1																2				2	1						3							1
11	122	02003-03017	EMIM or C2MIm	FSI	[EMIM][FSI]	1-ethyl-3-methylimidazolium imidodisulfurylfluoride	C6H11F2N3O4S2	333	1.43758	train	1																2				2	1						3							1
11	123	02003-03017	EMIM or C2MIm	FSI	[EMIM][FSI]	1-ethyl-3-methylimidazolium imidodisulfurylfluoride	C6H11F2N3O4S2	338	1.43619	train	1																2				2	1						3							1
11	124	02003-03017	EMIM or C2MIm	FSI	[EMIM][FSI]	1-ethyl-3-methylimidazolium imidodisulfurylfluoride	C6H11F2N3O4S2	343	1.43481	train	1																2				2	1						3							1
11	125	02003-03017	EMIM or C2MIm	FSI	[EMIM][FSI]	1-ethyl-3-methylimidazolium imidodisulfurylfluoride	C6H11F2N3O4S2	348	1.43342	test	1																2				2	1						3							1
11	126	02003-03017	EMIM or C2MIm	FSI	[EMIM][FSI]	1-ethyl-3-methylimidazolium imidodisulfurylfluoride	C6H11F2N3O4S2	353	1.43207	train	1																2				2	1						3							1
19	127	02003-03028	EMIM or C2MIm	C(CN)3	[EMIM][C(CN)3]	1-ethyl-3-methylimidazolium tricyanomethide	C10H11N5	283.15	1.516	train	1															3					2	1		1				3
19	128	02003-03028	EMIM or C2MIm	C(CN)3	[EMIM][C(CN)3]	1-ethyl-3-methylimidazolium tricyanomethide	C10H11N5	293.15	1.5131	train	1															3					2	1		1				3
19	129	02003-03028	EMIM or C2MIm	C(CN)3	[EMIM][C(CN)3]	1-ethyl-3-methylimidazolium tricyanomethide	C10H11N5	303.15	1.5101	train	1															3					2	1		1				3
19	130	02003-03028	EMIM or C2MIm	C(CN)3	[EMIM][C(CN)3]	1-ethyl-3-methylimidazolium tricyanomethide	C10H11N5	313.15	1.5071	test	1															3					2	1		1				3
20	131	02003-04002	EMIM or C2MIm	mesy	[EMIM][mesy]	1-ethyl-3-methylimidazolium methanesulfonate	C7H14N2O3S	298.15	1.4996	train	1																1				3	1						3	1
20	132	02003-04002	EMIM or C2MIm	mesy	[EMIM][mesy]	1-ethyl-3-methylimidazolium methanesulfonate	C7H14N2O3S	283.15	1.5018	train	1																1				3	1						3	1
20	133	02003-04002	EMIM or C2MIm	mesy	[EMIM][mesy]	1-ethyl-3-methylimidazolium methanesulfonate	C7H14N2O3S	293.15	1.4996	train	1																1				3	1						3	1
20	134	02003-04002	EMIM or C2MIm	mesy	[EMIM][mesy]	1-ethyl-3-methylimidazolium methanesulfonate	C7H14N2O3S	303.15	1.4977	train	1																1				3	1						3	1
20	135	02003-04002	EMIM or C2MIm	mesy	[EMIM][mesy]	1-ethyl-3-methylimidazolium methanesulfonate	C7H14N2O3S	313.15	1.4949	test	1																1				3	1						3	1
7	136	02003-04002	EMIM or C2MIm	mesy	[EMIM][mesy]	1-ethyl-3-methylimidazolium methanesulfonate	C7H14N2O3S	293.15	1.4922	train	1																1				3	1						3	1
18	137	02003-04002	EMIM or C2MIm	mesy	[EMIM][mesy]	1-ethyl-3-methylimidazolium methanesulfonate	C7H14N2O3S	288.37	1.49823	train	1																1				3	1						3	1
18	138	02003-04002	EMIM or C2MIm	mesy	[EMIM][mesy]	1-ethyl-3-methylimidazolium methanesulfonate	C7H14N2O3S	293.28	1.49682	train	1																1				3	1						3	1
18	139	02003-04002	EMIM or C2MIm	mesy	[EMIM][mesy]	1-ethyl-3-methylimidazolium methanesulfonate	C7H14N2O3S	298.19	1.49542	train	1																1				3	1						3	1
18	140	02003-04002	EMIM or C2MIm	mesy	[EMIM][mesy]	1-ethyl-3-methylimidazolium methanesulfonate	C7H14N2O3S	303.1	1.49399	test	1																1				3	1						3	1
18	141	02003-04002	EMIM or C2MIm	mesy	[EMIM][mesy]	1-ethyl-3-methylimidazolium methanesulfonate	C7H14N2O3S	308.01	1.49254	train	1																1				3	1						3	1
18	142	02003-04002	EMIM or C2MIm	mesy	[EMIM][mesy]	1-ethyl-3-methylimidazolium methanesulfonate	C7H14N2O3S	312.91	1.49114	train	1																1				3	1						3	1
18	143	02003-04002	EMIM or C2MIm	mesy	[EMIM][mesy]	1-ethyl-3-methylimidazolium methanesulfonate	C7H14N2O3S	298.15	1.49543	train	1																1				3	1						3	1
11	144	02003-04002	EMIM or C2MIm	mesy	[EMIM][mesy]	1-ethyl-3-methylimidazolium methanesulfonate	C7H14N2O3S	283	1.49994	train	1																1				3	1						3	1
11	145	02003-04002	EMIM or C2MIm	mesy	[EMIM][mesy]	1-ethyl-3-methylimidazolium methanesulfonate	C7H14N2O3S	288	1.49855	test	1																1				3	1						3	1
11	146	02003-04002	EMIM or C2MIm	mesy	[EMIM][mesy]	1-ethyl-3-methylimidazolium methanesulfonate	C7H14N2O3S	293	1.49718	train	1																1				3	1						3	1
11	147	02003-04002	EMIM or C2MIm	mesy	[EMIM][mesy]	1-ethyl-3-methylimidazolium methanesulfonate	C7H14N2O3S	298	1.49582	train	1																1				3	1						3	1
11	148	02003-04002	EMIM or C2MIm	mesy	[EMIM][mesy]	1-ethyl-3-methylimidazolium methanesulfonate	C7H14N2O3S	303	1.49444	train	1																1				3	1						3	1
11	149	02003-04002	EMIM or C2MIm	mesy	[EMIM][mesy]	1-ethyl-3-methylimidazolium methanesulfonate	C7H14N2O3S	308	1.49308	train	1																1				3	1						3	1
11	150	02003-04002	EMIM or C2MIm	mesy	[EMIM][mesy]	1-ethyl-3-methylimidazolium methanesulfonate	C7H14N2O3S	313	1.49172	test	1																1				3	1						3	1
11	151	02003-04002	EMIM or C2MIm	mesy	[EMIM][mesy]	1-ethyl-3-methylimidazolium methanesulfonate	C7H14N2O3S	318	1.49039	train	1																1				3	1						3	1
11	152	02003-04002	EMIM or C2MIm	mesy	[EMIM][mesy]	1-ethyl-3-methylimidazolium methanesulfonate	C7H14N2O3S	323	1.48905	train	1																1				3	1						3	1
11	153	02003-04002	EMIM or C2MIm	mesy	[EMIM][mesy]	1-ethyl-3-methylimidazolium methanesulfonate	C7H14N2O3S	328	1.48768	train	1																1				3	1						3	1
11	154	02003-04002	EMIM or C2MIm	mesy	[EMIM][mesy]	1-ethyl-3-methylimidazolium methanesulfonate	C7H14N2O3S	333	1.48638	train	1																1				3	1						3	1
11	155	02003-04002	EMIM or C2MIm	mesy	[EMIM][mesy]	1-ethyl-3-methylimidazolium methanesulfonate	C7H14N2O3S	338	1.48498	test	1																1				3	1						3	1
11	156	02003-04002	EMIM or C2MIm	mesy	[EMIM][mesy]	1-ethyl-3-methylimidazolium methanesulfonate	C7H14N2O3S	343	1.48367	train	1																1				3	1						3	1
11	157	02003-04002	EMIM or C2MIm	mesy	[EMIM][mesy]	1-ethyl-3-methylimidazolium methanesulfonate	C7H14N2O3S	348	1.4823	train	1																1				3	1						3	1
11	158	02003-04002	EMIM or C2MIm	mesy	[EMIM][mesy]	1-ethyl-3-methylimidazolium methanesulfonate	C7H14N2O3S	353	1.48095	train	1																1				3	1						3	1
21	159	02003-04002	EMIM or C2MIm	mesy	[EMIM][mesy]	1-ethyl-3-methylimidazolium methanesulfonate	C7H14N2O3S	298.15	1.4771	train	1																1				3	1						3	1
2	160	02003-04003	EMIM or C2MIm	TfO	[EMIM][TfO]	1-ethyl-3-methylimidazolium trifluoromethanesulfonate	C7H11F3N2O3S	298.15	1.4332	test	1																1				2	1						3	1										1
23	161	02003-04003	EMIM or C2MIm	TfO	[EMIM][TfO]	1-ethyl-3-methylimidazolium trifluoromethanesulfonate	C7H11F3N2O3S	298.15	1.43322	train	1																1				2	1						3	1										1
23	162	02003-04003	EMIM or C2MIm	TfO	[EMIM][TfO]	1-ethyl-3-methylimidazolium trifluoromethanesulfonate	C7H11F3N2O3S	298.15	1.43338	train	1																1				2	1						3	1										1
22	163	02003-04003	EMIM or C2MIm	TfO	[EMIM][TfO]	1-ethyl-3-methylimidazolium trifluoromethanesulfonate	C7H11F3N2O3S	298.15	1.4332	train	1																1				2	1						3	1										1
24	164	02003-04003	EMIM or C2MIm	TfO	[EMIM][TfO]	1-ethyl-3-methylimidazolium trifluoromethanesulfonate	C7H11F3N2O3S	298.15	1.43322	train	1																1				2	1						3	1										1
18	165	02003-04003	EMIM or C2MIm	TfO	[EMIM][TfO]	1-ethyl-3-methylimidazolium trifluoromethanesulfonate	C7H11F3N2O3S	288.37	1.43572	test	1																1				2	1						3	1										1
18	166	02003-04003	EMIM or C2MIm	TfO	[EMIM][TfO]	1-ethyl-3-methylimidazolium trifluoromethanesulfonate	C7H11F3N2O3S	293.28	1.43432	train	1																1				2	1						3	1										1
18	167	02003-04003	EMIM or C2MIm	TfO	[EMIM][TfO]	1-ethyl-3-methylimidazolium trifluoromethanesulfonate	C7H11F3N2O3S	298.19	1.43296	train	1																1				2	1						3	1										1
18	168	02003-04003	EMIM or C2MIm	TfO	[EMIM][TfO]	1-ethyl-3-methylimidazolium trifluoromethanesulfonate	C7H11F3N2O3S	303.1	1.43159	train	1																1				2	1						3	1										1
18	169	02003-04003	EMIM or C2MIm	TfO	[EMIM][TfO]	1-ethyl-3-methylimidazolium trifluoromethanesulfonate	C7H11F3N2O3S	308.01	1.43025	train	1																1				2	1						3	1										1
18	170	02003-04003	EMIM or C2MIm	TfO	[EMIM][TfO]	1-ethyl-3-methylimidazolium trifluoromethanesulfonate	C7H11F3N2O3S	312.91	1.42886	test	1																1				2	1						3	1										1
18	171	02003-04003	EMIM or C2MIm	TfO	[EMIM][TfO]	1-ethyl-3-methylimidazolium trifluoromethanesulfonate	C7H11F3N2O3S	298.15	1.43297	train	1																1				2	1						3	1										1
18	172	02003-04007	EMIM or C2MIm	Tos	[EMIM][Tos]	1-ethyl-3-methylimidazolium tosylate	C13H18N2SO3	322.73	1.53844	train	1																1				2	2						8	1					1
18	173	02003-04007	EMIM or C2MIm	Tos	[EMIM][Tos]	1-ethyl-3-methylimidazolium tosylate	C13H18N2SO3	325.68	1.53757	train	1																1				2	2						8	1					1
18	174	02003-04007	EMIM or C2MIm	Tos	[EMIM][Tos]	1-ethyl-3-methylimidazolium tosylate	C13H18N2SO3	327.64	1.53703	train	1																1				2	2						8	1					1
18	175	02003-04007	EMIM or C2MIm	Tos	[EMIM][Tos]	1-ethyl-3-methylimidazolium tosylate	C13H18N2SO3	329.61	1.53649	test	1																1				2	2						8	1					1
18	176	02003-04007	EMIM or C2MIm	Tos	[EMIM][Tos]	1-ethyl-3-methylimidazolium tosylate	C13H18N2SO3	332.55	1.5357	train	1																1				2	2						8	1					1
18	177	02003-04007	EMIM or C2MIm	Tos	[EMIM][Tos]	1-ethyl-3-methylimidazolium tosylate	C13H18N2SO3	334.52	1.53509	train	1																1				2	2						8	1					1
18	178	02003-04007	EMIM or C2MIm	Tos	[EMIM][Tos]	1-ethyl-3-methylimidazolium tosylate	C13H18N2SO3	336.48	1.53461	train	1																1				2	2						8	1					1
18	179	02003-04007	EMIM or C2MIm	Tos	[EMIM][Tos]	1-ethyl-3-methylimidazolium tosylate	C13H18N2SO3	338.44	1.53409	train	1																1				2	2						8	1					1
18	180	02003-04007	EMIM or C2MIm	Tos	[EMIM][Tos]	1-ethyl-3-methylimidazolium tosylate	C13H18N2SO3	340.41	1.53356	test	1																1				2	2						8	1					1
18	181	02003-04007	EMIM or C2MIm	Tos	[EMIM][Tos]	1-ethyl-3-methylimidazolium tosylate	C13H18N2SO3	342.37	1.53304	train	1																1				2	2						8	1					1
18	182	02003-04007	EMIM or C2MIm	Tos	[EMIM][Tos]	1-ethyl-3-methylimidazolium tosylate	C13H18N2SO3	298.15	1.54513	train	1																1				2	2						8	1					1
20	183	02003-04008	EMIM or C2MIm	C8SO4	[EMIM][C8SO4]	1-ethyl-3-methylimidazolium octylsulfate	C14H28N2SO4	283.15	1.4786	train	1																1				3	8						3	2
20	184	02003-04008	EMIM or C2MIm	C8SO4	[EMIM][C8SO4]	1-ethyl-3-methylimidazolium octylsulfate	C14H28N2SO4	293.15	1.4766	train	1																1				3	8						3	2
20	185	02003-04008	EMIM or C2MIm	C8SO4	[EMIM][C8SO4]	1-ethyl-3-methylimidazolium octylsulfate	C14H28N2SO4	303.15	1.4737	test	1																1				3	8						3	2
20	186	02003-04008	EMIM or C2MIm	C8SO4	[EMIM][C8SO4]	1-ethyl-3-methylimidazolium octylsulfate	C14H28N2SO4	313.15	1.4712	train	1																1				3	8						3	2
25	187	02003-04017	EMIM or C2MIm	MeSO4	[EMIM][MeSO4]	1-ethyl-3-methylimidazolium methylsulfate	C7H14N2O4S	298.15	1.48125	train	1																1				3	1						3	2
26	188	02003-04018	EMIM or C2MIm	EtSO4	[EMIM][EtSO4]	1-ethyl-3-methylimidazolium ethylsulfate	C8H16N2O4S	298.15	1.47903	train	1																1				3	2						3	2
27	189	02003-04018	EMIM or C2MIm	EtSO4	[EMIM][EtSO4]	1-ethyl-3-methylimidazolium ethylsulfate	C8H16N2O4S	298.15	1.4794	train	1																1				3	2						3	2
28	190	02003-04018	EMIM or C2MIm	EtSO4	[EMIM][EtSO4]	1-ethyl-3-methylimidazolium ethylsulfate	C8H16N2O4S	298.15	1.4794	test	1																1				3	2						3	2
28	191	02003-04018	EMIM or C2MIm	EtSO4	[EMIM][EtSO4]	1-ethyl-3-methylimidazolium ethylsulfate	C8H16N2O4S	298.15	1.4794	train	1																1				3	2						3	2
29	192	02003-04018	EMIM or C2MIm	EtSO4	[EMIM][EtSO4]	1-ethyl-3-methylimidazolium ethylsulfate	C8H16N2O4S	298.15	1.4794	train	1																1				3	2						3	2
30	193	02003-04018	EMIM or C2MIm	EtSO4	[EMIM][EtSO4]	1-ethyl-3-methylimidazolium ethylsulfate	C8H16N2O4S	298.15	1.47889	train	1																1				3	2						3	2
31	194	02003-04018	EMIM or C2MIm	EtSO4	[EMIM][EtSO4]	1-ethyl-3-methylimidazolium ethylsulfate	C8H16N2O4S	298.15	1.4789	train	1																1				3	2						3	2
31	195	02003-04018	EMIM or C2MIm	EtSO4	[EMIM][EtSO4]	1-ethyl-3-methylimidazolium ethylsulfate	C8H16N2O4S	313.15	1.4745	test	1																1				3	2						3	2
32	196	02003-04018	EMIM or C2MIm	EtSO4	[EMIM][EtSO4]	1-ethyl-3-methylimidazolium ethylsulfate	C8H16N2O4S	298.15	1.47903	train	1																1				3	2						3	2
33	197	02003-04018	EMIM or C2MIm	EtSO4	[EMIM][EtSO4]	1-ethyl-3-methylimidazolium ethylsulfate	C8H16N2O4S	298.15	1.4791	train	1																1				3	2						3	2
34	198	02003-04018	EMIM or C2MIm	EtSO4	[EMIM][EtSO4]	1-ethyl-3-methylimidazolium ethylsulfate	C8H16N2O4S	298.15	1.50591	train	1																1				3	2						3	2
35	199	02003-04018	EMIM or C2MIm	EtSO4	[EMIM][EtSO4]	1-ethyl-3-methylimidazolium ethylsulfate	C8H16N2O4S	298.15	1.4791	train	1																1				3	2						3	2
36	200	02003-04018	EMIM or C2MIm	EtSO4	[EMIM][EtSO4]	1-ethyl-3-methylimidazolium ethylsulfate	C8H16N2O4S	298.15	1.4791	test	1																1				3	2						3	2
37	201	02003-04018	EMIM or C2MIm	EtSO4	[EMIM][EtSO4]	1-ethyl-3-methylimidazolium ethylsulfate	C8H16N2O4S	298.15	1.4789	train	1																1				3	2						3	2
37	202	02003-04018	EMIM or C2MIm	EtSO4	[EMIM][EtSO4]	1-ethyl-3-methylimidazolium ethylsulfate	C8H16N2O4S	313.15	1.4745	train	1																1				3	2						3	2
38	203	02003-04018	EMIM or C2MIm	EtSO4	[EMIM][EtSO4]	1-ethyl-3-methylimidazolium ethylsulfate	C8H16N2O4S	298.2	1.4789	train	1																1				3	2						3	2
38	204	02003-04018	EMIM or C2MIm	EtSO4	[EMIM][EtSO4]	1-ethyl-3-methylimidazolium ethylsulfate	C8H16N2O4S	313.2	1.4745	train	1																1				3	2						3	2
39	205	02003-04018	EMIM or C2MIm	EtSO4	[EMIM][EtSO4]	1-ethyl-3-methylimidazolium ethylsulfate	C8H16N2O4S	293.15	1.47959	test	1																1				3	2						3	2
39	206	02003-04018	EMIM or C2MIm	EtSO4	[EMIM][EtSO4]	1-ethyl-3-methylimidazolium ethylsulfate	C8H16N2O4S	303.15	1.47694	train	1																1				3	2						3	2
39	207	02003-04018	EMIM or C2MIm	EtSO4	[EMIM][EtSO4]	1-ethyl-3-methylimidazolium ethylsulfate	C8H16N2O4S	313.15	1.47429	train	1																1				3	2						3	2
39	208	02003-04018	EMIM or C2MIm	EtSO4	[EMIM][EtSO4]	1-ethyl-3-methylimidazolium ethylsulfate	C8H16N2O4S	323.15	1.47158	train	1																1				3	2						3	2
39	209	02003-04018	EMIM or C2MIm	EtSO4	[EMIM][EtSO4]	1-ethyl-3-methylimidazolium ethylsulfate	C8H16N2O4S	333.15	1.46893	train	1																1				3	2						3	2
39	210	02003-04018	EMIM or C2MIm	EtSO4	[EMIM][EtSO4]	1-ethyl-3-methylimidazolium ethylsulfate	C8H16N2O4S	343.15	1.46625	test	1																1				3	2						3	2
39	211	02003-04018	EMIM or C2MIm	EtSO4	[EMIM][EtSO4]	1-ethyl-3-methylimidazolium ethylsulfate	C8H16N2O4S	353.15	1.46359	train	1																1				3	2						3	2
11	212	02003-04018	EMIM or C2MIm	EtSO4	[EMIM][EtSO4]	1-ethyl-3-methylimidazolium ethyl sulfate	C8H16N2O4S	283	1.48317	train	1																1				3	2						3	2
11	213	02003-04018	EMIM or C2MIm	EtSO4	[EMIM][EtSO4]	1-ethyl-3-methylimidazolium ethyl sulfate	C8H16N2O4S	288	1.48185	train	1																1				3	2						3	2
11	214	02003-04018	EMIM or C2MIm	EtSO4	[EMIM][EtSO4]	1-ethyl-3-methylimidazolium ethyl sulfate	C8H16N2O4S	293	1.48053	train	1																1				3	2						3	2
11	215	02003-04018	EMIM or C2MIm	EtSO4	[EMIM][EtSO4]	1-ethyl-3-methylimidazolium ethyl sulfate	C8H16N2O4S	298	1.47921	test	1																1				3	2						3	2
11	216	02003-04018	EMIM or C2MIm	EtSO4	[EMIM][EtSO4]	1-ethyl-3-methylimidazolium ethyl sulfate	C8H16N2O4S	303	1.47789	train	1																1				3	2						3	2
11	217	02003-04018	EMIM or C2MIm	EtSO4	[EMIM][EtSO4]	1-ethyl-3-methylimidazolium ethyl sulfate	C8H16N2O4S	308	1.47657	train	1																1				3	2						3	2
11	218	02003-04018	EMIM or C2MIm	EtSO4	[EMIM][EtSO4]	1-ethyl-3-methylimidazolium ethyl sulfate	C8H16N2O4S	313	1.47528	train	1																1				3	2						3	2
11	219	02003-04018	EMIM or C2MIm	EtSO4	[EMIM][EtSO4]	1-ethyl-3-methylimidazolium ethyl sulfate	C8H16N2O4S	318	1.47395	train	1																1				3	2						3	2
11	220	02003-04018	EMIM or C2MIm	EtSO4	[EMIM][EtSO4]	1-ethyl-3-methylimidazolium ethyl sulfate	C8H16N2O4S	323	1.47262	test	1																1				3	2						3	2
11	221	02003-04018	EMIM or C2MIm	EtSO4	[EMIM][EtSO4]	1-ethyl-3-methylimidazolium ethyl sulfate	C8H16N2O4S	328	1.4713	train	1																1				3	2						3	2
11	222	02003-04018	EMIM or C2MIm	EtSO4	[EMIM][EtSO4]	1-ethyl-3-methylimidazolium ethyl sulfate	C8H16N2O4S	333	1.46994	train	1																1				3	2						3	2
11	223	02003-04018	EMIM or C2MIm	EtSO4	[EMIM][EtSO4]	1-ethyl-3-methylimidazolium ethyl sulfate	C8H16N2O4S	338	1.4685	train	1																1				3	2						3	2
11	224	02003-04018	EMIM or C2MIm	EtSO4	[EMIM][EtSO4]	1-ethyl-3-methylimidazolium ethyl sulfate	C8H16N2O4S	343	1.46723	train	1																1				3	2						3	2
11	225	02003-04018	EMIM or C2MIm	EtSO4	[EMIM][EtSO4]	1-ethyl-3-methylimidazolium ethyl sulfate	C8H16N2O4S	348	1.46596	test	1																1				3	2						3	2
11	226	02003-04018	EMIM or C2MIm	EtSO4	[EMIM][EtSO4]	1-ethyl-3-methylimidazolium ethyl sulfate	C8H16N2O4S	353	1.46468	train	1																1				3	2						3	2
40	227	02003-04018	EMIM or C2MIm	EtSO4	[EMIM][EtSO4]	1-ethyl-3-methylimidazolium ethyl sulfate	C8H16N2O4S	298.15	1.4106	train	1																1				3	2						3	2
21	228	02003-04018	EMIM or C2MIm	EtSO4	[EMIM][EtSO4]	1-ethyl-3-methylimidazolium ethyl sulfate	C8H16N2O4S	298.15	1.4771	train	1																1				3	2						3	2
41	229	02003-04019	EMIM or C2MIm	C5H11O2SO4	[EMIM][C5H11O2SO4]	1-ethyl-3-methylimidazolium diethyleneglycolmonomethylethersulphate	C11H22N2O6S	298.15	1.48113	train	1																1				3	5							4			3
42	230	02003-04019	EMIM or C2MIm	C5H11O2SO4	[EMIM][C5H11O2SO4]	1-ethyl-3-methylimidazolium diethyleneglycolmonomethylethersulphate	C11H22N2O6S	308.2	1.47929	test	1																1				3	5							4			3
42	231	02003-04019	EMIM or C2MIm	C5H11O2SO4	[EMIM][C5H11O2SO4]	1-ethyl-3-methylimidazolium diethyleneglycolmonomethylethersulphate	C11H22N2O6S	313.2	1.47565	train	1																1				3	5							4			3
42	232	02003-04019	EMIM or C2MIm	C5H11O2SO4	[EMIM][C5H11O2SO4]	1-ethyl-3-methylimidazolium diethyleneglycolmonomethylethersulphate	C11H22N2O6S	323.2	1.47281	train	1																1				3	5							4			3
42	233	02003-04019	EMIM or C2MIm	C5H11O2SO4	[EMIM][C5H11O2SO4]	1-ethyl-3-methylimidazolium diethyleneglycolmonomethylethersulphate	C11H22N2O6S	333.2	1.46995	train	1																1				3	5							4			3
11	234	02003-04021	EMIM or C2MIm	HSO4	[EMIM][HSO4]	1-ethyl-3-methylimidazolium hydrogen sulfate	C6H12N2O4S	283	1.50042	train	1																1				2	1						3	1		1
11	235	02003-04021	EMIM or C2MIm	HSO4	[EMIM][HSO4]	1-ethyl-3-methylimidazolium hydrogen sulfate	C6H12N2O4S	288	1.49931	test	1																1				2	1						3	1		1
11	236	02003-04021	EMIM or C2MIm	HSO4	[EMIM][HSO4]	1-ethyl-3-methylimidazolium hydrogen sulfate	C6H12N2O4S	293	1.4982	train	1																1				2	1						3	1		1
11	237	02003-04021	EMIM or C2MIm	HSO4	[EMIM][HSO4]	1-ethyl-3-methylimidazolium hydrogen sulfate	C6H12N2O4S	298	1.4971	train	1																1				2	1						3	1		1
11	238	02003-04021	EMIM or C2MIm	HSO4	[EMIM][HSO4]	1-ethyl-3-methylimidazolium hydrogen sulfate	C6H12N2O4S	303	1.49601	train	1																1				2	1						3	1		1
11	239	02003-04021	EMIM or C2MIm	HSO4	[EMIM][HSO4]	1-ethyl-3-methylimidazolium hydrogen sulfate	C6H12N2O4S	308	1.49489	train	1																1				2	1						3	1		1
11	240	02003-04021	EMIM or C2MIm	HSO4	[EMIM][HSO4]	1-ethyl-3-methylimidazolium hydrogen sulfate	C6H12N2O4S	313	1.49379	test	1																1				2	1						3	1		1
11	241	02003-04021	EMIM or C2MIm	HSO4	[EMIM][HSO4]	1-ethyl-3-methylimidazolium hydrogen sulfate	C6H12N2O4S	318	1.49269	train	1																1				2	1						3	1		1
11	242	02003-04021	EMIM or C2MIm	HSO4	[EMIM][HSO4]	1-ethyl-3-methylimidazolium hydrogen sulfate	C6H12N2O4S	323	1.49161	train	1																1				2	1						3	1		1
11	243	02003-04021	EMIM or C2MIm	HSO4	[EMIM][HSO4]	1-ethyl-3-methylimidazolium hydrogen sulfate	C6H12N2O4S	328	1.49052	train	1																1				2	1						3	1		1
11	244	02003-04021	EMIM or C2MIm	HSO4	[EMIM][HSO4]	1-ethyl-3-methylimidazolium hydrogen sulfate	C6H12N2O4S	333	1.48944	train	1																1				2	1						3	1		1
11	245	02003-04021	EMIM or C2MIm	HSO4	[EMIM][HSO4]	1-ethyl-3-methylimidazolium hydrogen sulfate	C6H12N2O4S	338	1.48836	test	1																1				2	1						3	1		1
11	246	02003-04021	EMIM or C2MIm	HSO4	[EMIM][HSO4]	1-ethyl-3-methylimidazolium hydrogen sulfate	C6H12N2O4S	343	1.48727	train	1																1				2	1						3	1		1
11	247	02003-04021	EMIM or C2MIm	HSO4	[EMIM][HSO4]	1-ethyl-3-methylimidazolium hydrogen sulfate	C6H12N2O4S	348	1.48623	train	1																1				2	1						3	1		1
11	248	02003-04021	EMIM or C2MIm	HSO4	[EMIM][HSO4]	1-ethyl-3-methylimidazolium hydrogen sulfate	C6H12N2O4S	353	1.48512	train	1																1				2	1						3	1		1
39	249	02003-04030	EMIM or C2MIm	CHF2CF2SO3	[EMIM][CHF2CF2SO3]	1-ethyl-3-methylimidazolium 1,1,2,2-tetrafluoroethanesulfonate	C8H12N2O3SF4	293.15	1.441	train	1																1				2	1						3	1			1						2
39	250	02003-04030	EMIM or C2MIm	CHF2CF2SO3	[EMIM][CHF2CF2SO3]	1-ethyl-3-methylimidazolium 1,1,2,2-tetrafluoroethanesulfonate	C8H12N2O3SF4	303.15	1.43833	test	1																1				2	1						3	1			1						2
39	251	02003-04030	EMIM or C2MIm	CHF2CF2SO3	[EMIM][CHF2CF2SO3]	1-ethyl-3-methylimidazolium 1,1,2,2-tetrafluoroethanesulfonate	C8H12N2O3SF4	313.15	1.4357	train	1																1				2	1						3	1			1						2
39	252	02003-04030	EMIM or C2MIm	CHF2CF2SO3	[EMIM][CHF2CF2SO3]	1-ethyl-3-methylimidazolium 1,1,2,2-tetrafluoroethanesulfonate	C8H12N2O3SF4	323.15	1.43304	train	1																1				2	1						3	1			1						2
39	253	02003-04030	EMIM or C2MIm	CHF2CF2SO3	[EMIM][CHF2CF2SO3]	1-ethyl-3-methylimidazolium 1,1,2,2-tetrafluoroethanesulfonate	C8H12N2O3SF4	333.15	1.43041	train	1																1				2	1						3	1			1						2
39	254	02003-04030	EMIM or C2MIm	CHF2CF2SO3	[EMIM][CHF2CF2SO3]	1-ethyl-3-methylimidazolium 1,1,2,2-tetrafluoroethanesulfonate	C8H12N2O3SF4	343.15	1.42777	train	1																1				2	1						3	1			1						2
39	255	02003-04030	EMIM or C2MIm	CHF2CF2SO3	[EMIM][CHF2CF2SO3]	1-ethyl-3-methylimidazolium 1,1,2,2-tetrafluoroethanesulfonate	C8H12N2O3SF4	353.15	1.42514	test	1																1				2	1						3	1			1						2
11	256	02003-05004	EMIM or C2MIm	(C2F5)3PF3 or TPTP	[EMIM][TPTP]	1-ethyl-3-methylimidazolium tris(pentafluoroethyl)trifluorophosphate	C12H11F18N2P	283	1.37305	train	1																			1	2	1						3										3	3
11	257	02003-05004	EMIM or C2MIm	(C2F5)3PF3 or TPTP	[EMIM][TPTP]	1-ethyl-3-methylimidazolium tris(pentafluoroethyl)trifluorophosphate	C12H11F18N2P	288	1.37176	train	1																			1	2	1						3										3	3
11	258	02003-05004	EMIM or C2MIm	(C2F5)3PF3 or TPTP	[EMIM][TPTP]	1-ethyl-3-methylimidazolium tris(pentafluoroethyl)trifluorophosphate	C12H11F18N2P	293	1.37043	train	1																			1	2	1						3										3	3
11	259	02003-05004	EMIM or C2MIm	(C2F5)3PF3 or TPTP	[EMIM][TPTP]	1-ethyl-3-methylimidazolium tris(pentafluoroethyl)trifluorophosphate	C12H11F18N2P	298	1.36916	train	1																			1	2	1						3										3	3
11	260	02003-05004	EMIM or C2MIm	(C2F5)3PF3 or TPTP	[EMIM][TPTP]	1-ethyl-3-methylimidazolium tris(pentafluoroethyl)trifluorophosphate	C12H11F18N2P	303	1.36783	test	1																			1	2	1						3										3	3
11	261	02003-05004	EMIM or C2MIm	(C2F5)3PF3 or TPTP	[EMIM][TPTP]	1-ethyl-3-methylimidazolium tris(pentafluoroethyl)trifluorophosphate	C12H11F18N2P	308	1.36656	train	1																			1	2	1						3										3	3
11	262	02003-05004	EMIM or C2MIm	(C2F5)3PF3 or TPTP	[EMIM][TPTP]	1-ethyl-3-methylimidazolium tris(pentafluoroethyl)trifluorophosphate	C12H11F18N2P	313	1.36525	train	1																			1	2	1						3										3	3
11	263	02003-05004	EMIM or C2MIm	(C2F5)3PF3 or TPTP	[EMIM][TPTP]	1-ethyl-3-methylimidazolium tris(pentafluoroethyl)trifluorophosphate	C12H11F18N2P	318	1.36399	train	1																			1	2	1						3										3	3
11	264	02003-05004	EMIM or C2MIm	(C2F5)3PF3 or TPTP	[EMIM][TPTP]	1-ethyl-3-methylimidazolium tris(pentafluoroethyl)trifluorophosphate	C12H11F18N2P	323	1.36267	train	1																			1	2	1						3										3	3
11	265	02003-05004	EMIM or C2MIm	(C2F5)3PF3 or TPTP	[EMIM][TPTP]	1-ethyl-3-methylimidazolium tris(pentafluoroethyl)trifluorophosphate	C12H11F18N2P	328	1.36141	test	1																			1	2	1						3										3	3
11	266	02003-05004	EMIM or C2MIm	(C2F5)3PF3 or TPTP	[EMIM][TPTP]	1-ethyl-3-methylimidazolium tris(pentafluoroethyl)trifluorophosphate	C12H11F18N2P	333	1.36011	train	1																			1	2	1						3										3	3
11	267	02003-05004	EMIM or C2MIm	(C2F5)3PF3 or TPTP	[EMIM][TPTP]	1-ethyl-3-methylimidazolium tris(pentafluoroethyl)trifluorophosphate	C12H11F18N2P	338	1.35887	train	1																			1	2	1						3										3	3
11	268	02003-05004	EMIM or C2MIm	(C2F5)3PF3 or TPTP	[EMIM][TPTP]	1-ethyl-3-methylimidazolium tris(pentafluoroethyl)trifluorophosphate	C12H11F18N2P	343	1.35756	train	1																			1	2	1						3										3	3
11	269	02003-05004	EMIM or C2MIm	(C2F5)3PF3 or TPTP	[EMIM][TPTP]	1-ethyl-3-methylimidazolium tris(pentafluoroethyl)trifluorophosphate	C12H11F18N2P	348	1.35635	train	1																			1	2	1						3										3	3
11	270	02003-05004	EMIM or C2MIm	(C2F5)3PF3 or TPTP	[EMIM][TPTP]	1-ethyl-3-methylimidazolium tris(pentafluoroethyl)trifluorophosphate	C12H11F18N2P	353	1.35509	test	1																			1	2	1						3										3	3
18	271	02003-05011	EMIM or C2MIm	Me2PO4	[EMIM][Me2PO4]	1-ethyl-3-methylimidazolium dimethylphosphate	C8H17N2PO4	298.19	1.48175	train	1																	1			4	1						3	3
18	272	02003-05011	EMIM or C2MIm	Me2PO4	[EMIM][Me2PO4]	1-ethyl-3-methylimidazolium dimethylphosphate	C8H17N2PO4	303.1	1.4805	train	1																	1			4	1						3	3
18	273	02003-05011	EMIM or C2MIm	Me2PO4	[EMIM][Me2PO4]	1-ethyl-3-methylimidazolium dimethylphosphate	C8H17N2PO4	308.01	1.47909	train	1																	1			4	1						3	3
18	274	02003-05011	EMIM or C2MIm	Me2PO4	[EMIM][Me2PO4]	1-ethyl-3-methylimidazolium dimethylphosphate	C8H17N2PO4	312.91	1.47771	train	1																	1			4	1						3	3
18	275	02003-05011	EMIM or C2MIm	Me2PO4	[EMIM][Me2PO4]	1-ethyl-3-methylimidazolium dimethylphosphate	C8H17N2PO4	317.82	1.47636	test	1																	1			4	1						3	3
18	276	02003-05011	EMIM or C2MIm	Me2PO4	[EMIM][Me2PO4]	1-ethyl-3-methylimidazolium dimethylphosphate	C8H17N2PO4	322.73	1.47511	train	1																	1			4	1						3	3
18	277	02003-05011	EMIM or C2MIm	Me2PO4	[EMIM][Me2PO4]	1-ethyl-3-methylimidazolium dimethylphosphate	C8H17N2PO4	327.64	1.47384	train	1																	1			4	1						3	3
18	278	02003-05011	EMIM or C2MIm	Me2PO4	[EMIM][Me2PO4]	1-ethyl-3-methylimidazolium dimethylphosphate	C8H17N2PO4	298.15	1.48176	train	1																	1			4	1						3	3
43	279	02003-05012	EMIM or C2MIm	DEP	[EMIM]DEP]	1-ethyl-3-methylimidazolium diethylphosphate	C10H21N2PO4	294.15	1.4932	train	1																	1			4	3						3	3
31	280	02003-05012	EMIM or C2MIm	DEP	[EMIM]DEP]	1-ethyl-3-methylimidazolium diethylphosphate	C10H21N2PO4	298.15	1.4733	test	1																	1			4	3						3	3
31	281	02003-05012	EMIM or C2MIm	DEP	[EMIM]DEP]	1-ethyl-3-methylimidazolium diethylphosphate	C10H21N2PO4	313.15	1.4691	train	1																	1			4	3						3	3
37	282	02003-05012	EMIM or C2MIm	DEP	[EMIM]DEP]	1-ethyl-3-methylimidazolium diethylphosphate	C10H21N2PO4	298.15	1.4733	train	1																	1			4	3						3	3
37	283	02003-05012	EMIM or C2MIm	DEP	[EMIM]DEP]	1-ethyl-3-methylimidazolium diethylphosphate	C10H21N2PO4	313.15	1.4691	train	1																	1			4	3						3	3
38	284	02003-05012	EMIM or C2MIm	DEP	[EMIM]DEP]	1-ethyl-3-methylimidazolium diethylphosphate	C10H21N2PO4	298.2	1.4733	train	1																	1			4	3						3	3
38	285	02003-05012	EMIM or C2MIm	DEP	[EMIM]DEP]	1-ethyl-3-methylimidazolium diethylphosphate	C10H21N2PO4	313.2	1.4691	test	1																	1			4	3						3	3
20	286	02003-05015	EMIM or C2MIm	MeOHPO2	[EMIM][MeOHPO2]	1-ethyl-3-methylimidazolium methylphosphonate	C7H15N2PO3	283.15	1.4969	train	1																	1			3	1						3	1		1
20	287	02003-05015	EMIM or C2MIm	MeOHPO2	[EMIM][MeOHPO2]	1-ethyl-3-methylimidazolium methylphosphonate	C7H15N2PO3	293.15	1.4935	train	1																	1			3	1						3	1		1
20	288	02003-05015	EMIM or C2MIm	MeOHPO2	[EMIM][MeOHPO2]	1-ethyl-3-methylimidazolium methylphosphonate	C7H15N2PO3	303.15	1.4928	train	1																	1			3	1						3	1		1
20	289	02003-05015	EMIM or C2MIm	MeOHPO2	[EMIM][MeOHPO2]	1-ethyl-3-methylimidazolium methylphosphonate	C7H15N2PO3	313.15	1.4902	train	1																	1			3	1						3	1		1
18	290	02003-05015	EMIM or C2MIm	MeOHPO2	[EMIM][MeOHPO2]	1-ethyl-3-methylimidazolium methylphosphonate	C7H15N2PO3	288.37	1.49534	test	1																	1			3	1						3	1		1
18	291	02003-05015	EMIM or C2MIm	MeOHPO2	[EMIM][MeOHPO2]	1-ethyl-3-methylimidazolium methylphosphonate	C7H15N2PO3	293.28	1.4939	train	1																	1			3	1						3	1		1
18	292	02003-05015	EMIM or C2MIm	MeOHPO2	[EMIM][MeOHPO2]	1-ethyl-3-methylimidazolium methylphosphonate	C7H15N2PO3	298.19	1.49249	train	1																	1			3	1						3	1		1
18	293	02003-05015	EMIM or C2MIm	MeOHPO2	[EMIM][MeOHPO2]	1-ethyl-3-methylimidazolium methylphosphonate	C7H15N2PO3	303.1	1.49115	train	1																	1			3	1						3	1		1
18	294	02003-05015	EMIM or C2MIm	MeOHPO2	[EMIM][MeOHPO2]	1-ethyl-3-methylimidazolium methylphosphonate	C7H15N2PO3	308.01	1.48982	train	1																	1			3	1						3	1		1
18	295	02003-05015	EMIM or C2MIm	MeOHPO2	[EMIM][MeOHPO2]	1-ethyl-3-methylimidazolium methylphosphonate	C7H15N2PO3	312.91	1.48854	test	1																	1			3	1						3	1		1
18	296	02003-05015	EMIM or C2MIm	MeOHPO2	[EMIM][MeOHPO2]	1-ethyl-3-methylimidazolium methylphosphonate	C7H15N2PO3	317.82	1.48714	train	1																	1			3	1						3	1		1
18	297	02003-05015	EMIM or C2MIm	MeOHPO2	[EMIM][MeOHPO2]	1-ethyl-3-methylimidazolium methylphosphonate	C7H15N2PO3	298.15	1.4925	train	1																	1			3	1						3	1		1
2	298	02003-06001	EMIM or C2MIm	TA or CF3COO	[EMIM][TA]	1-ethyl-3-methylimidazolium trifluoroacetate	C8H11F3N2O2	298.15	1.4405	train	1																				2	1						3	1	1							1		1
43	299	02003-06003	EMIM or C2MIm	OAc	[EMIM][OAc]	1-ethyl-3-methylimidazolium acetate	C8H14N2O2	294.15	1.4743	train	1																				3	1						3	1
18	300	02003-06003	EMIM or C2MIm	OAc	[EMIM][OAc]	1-ethyl-3-methylimidazolium acetate	C8H14N2O2	288.37	1.50371	test	1																				3	1						3	1								1
18	301	02003-06003	EMIM or C2MIm	OAc	[EMIM][OAc]	1-ethyl-3-methylimidazolium acetate	C8H14N2O2	293.28	1.50233	train	1																				3	1						3	1								1
18	302	02003-06003	EMIM or C2MIm	OAc	[EMIM][OAc]	1-ethyl-3-methylimidazolium acetate	C8H14N2O2	298.19	1.50091	train	1																				3	1						3	1								1
18	303	02003-06003	EMIM or C2MIm	OAc	[EMIM][OAc]	1-ethyl-3-methylimidazolium acetate	C8H14N2O2	303.1	1.49949	train	1																				3	1						3	1								1
18	304	02003-06003	EMIM or C2MIm	OAc	[EMIM][OAc]	1-ethyl-3-methylimidazolium acetate	C8H14N2O2	308.01	1.49807	train	1																				3	1						3	1								1
18	305	02003-06003	EMIM or C2MIm	OAc	[EMIM][OAc]	1-ethyl-3-methylimidazolium acetate	C8H14N2O2	312.91	1.49666	test	1																				3	1						3	1								1
18	306	02003-06003	EMIM or C2MIm	OAc	[EMIM][OAc]	1-ethyl-3-methylimidazolium acetate	C8H14N2O2	298.15	1.50092	train	1																				3	1						3	1								1
44	307	02003-06003	EMIM or C2MIm	OAc	[EMIM][OAc]	1-ethyl-3-methylimidazolium acetate	C8H14N2O2	283.15	1.50402	train	1																				3	1						3	1								1
44	308	02003-06003	EMIM or C2MIm	OAc	[EMIM][OAc]	1-ethyl-3-methylimidazolium acetate	C8H14N2O2	288.15	1.50267	train	1																				3	1						3	1								1
44	309	02003-06003	EMIM or C2MIm	OAc	[EMIM][OAc]	1-ethyl-3-methylimidazolium acetate	C8H14N2O2	293.15	1.50129	train	1																				3	1						3	1								1
44	310	02003-06003	EMIM or C2MIm	OAc	[EMIM][OAc]	1-ethyl-3-methylimidazolium acetate	C8H14N2O2	298.15	1.49992	test	1																				3	1						3	1								1
44	311	02003-06003	EMIM or C2MIm	OAc	[EMIM][OAc]	1-ethyl-3-methylimidazolium acetate	C8H14N2O2	303.15	1.49854	train	1																				3	1						3	1								1
44	312	02003-06003	EMIM or C2MIm	OAc	[EMIM][OAc]	1-ethyl-3-methylimidazolium acetate	C8H14N2O2	308.15	1.49718	train	1																				3	1						3	1								1
44	313	02003-06003	EMIM or C2MIm	OAc	[EMIM][OAc]	1-ethyl-3-methylimidazolium acetate	C8H14N2O2	313.15	1.49581	train	1																				3	1						3	1								1
44	314	02003-06003	EMIM or C2MIm	OAc	[EMIM][OAc]	1-ethyl-3-methylimidazolium acetate	C8H14N2O2	318.15	1.49447	train	1																				3	1						3	1								1
44	315	02003-06003	EMIM or C2MIm	OAc	[EMIM][OAc]	1-ethyl-3-methylimidazolium acetate	C8H14N2O2	323.15	1.49307	test	1																				3	1						3	1								1
44	316	02003-06003	EMIM or C2MIm	OAc	[EMIM][OAc]	1-ethyl-3-methylimidazolium acetate	C8H14N2O2	328.15	1.49171	train	1																				3	1						3	1								1
44	317	02003-06003	EMIM or C2MIm	OAc	[EMIM][OAc]	1-ethyl-3-methylimidazolium acetate	C8H14N2O2	333.15	1.49035	train	1																				3	1						3	1								1
44	318	02003-06003	EMIM or C2MIm	OAc	[EMIM][OAc]	1-ethyl-3-methylimidazolium acetate	C8H14N2O2	338.15	1.48899	train	1																				3	1						3	1								1
44	319	02003-06003	EMIM or C2MIm	OAc	[EMIM][OAc]	1-ethyl-3-methylimidazolium acetate	C8H14N2O2	343.15	1.48756	train	1																				3	1						3	1								1
44	320	02003-06003	EMIM or C2MIm	OAc	[EMIM][OAc]	1-ethyl-3-methylimidazolium acetate	C8H14N2O2	348.15	1.48613	test	1																				3	1						3	1								1
44	321	02003-06003	EMIM or C2MIm	OAc	[EMIM][OAc]	1-ethyl-3-methylimidazolium acetate	C8H14N2O2	353.15	1.48476	train	1																				3	1						3	1								1
45	322	02003-06003	EMIM or C2MIm	OAc	[EMIM][OAc]	1-ethyl-3-methylimidazolium acetate	C8H14N2O2	283.15	1.50423	train	1																				3	1						3	1								1
45	323	02003-06003	EMIM or C2MIm	OAc	[EMIM][OAc]	1-ethyl-3-methylimidazolium acetate	C8H14N2O2	288.15	1.50283	train	1																				3	1						3	1								1
45	324	02003-06003	EMIM or C2MIm	OAc	[EMIM][OAc]	1-ethyl-3-methylimidazolium acetate	C8H14N2O2	293.15	1.50144	train	1																				3	1						3	1								1
45	325	02003-06003	EMIM or C2MIm	OAc	[EMIM][OAc]	1-ethyl-3-methylimidazolium acetate	C8H14N2O2	298.15	1.50001	test	1																				3	1						3	1								1
45	326	02003-06003	EMIM or C2MIm	OAc	[EMIM][OAc]	1-ethyl-3-methylimidazolium acetate	C8H14N2O2	303.15	1.49861	train	1																				3	1						3	1								1
45	327	02003-06003	EMIM or C2MIm	OAc	[EMIM][OAc]	1-ethyl-3-methylimidazolium acetate	C8H14N2O2	308.15	1.49718	train	1																				3	1						3	1								1
45	328	02003-06003	EMIM or C2MIm	OAc	[EMIM][OAc]	1-ethyl-3-methylimidazolium acetate	C8H14N2O2	313.15	1.49577	train	1																				3	1						3	1								1
45	329	02003-06003	EMIM or C2MIm	OAc	[EMIM][OAc]	1-ethyl-3-methylimidazolium acetate	C8H14N2O2	318.15	1.49436	train	1																				3	1						3	1								1
45	330	02003-06003	EMIM or C2MIm	OAc	[EMIM][OAc]	1-ethyl-3-methylimidazolium acetate	C8H14N2O2	323.15	1.49295	test	1																				3	1						3	1								1
45	331	02003-06003	EMIM or C2MIm	OAc	[EMIM][OAc]	1-ethyl-3-methylimidazolium acetate	C8H14N2O2	328.15	1.49154	train	1																				3	1						3	1								1
45	332	02003-06003	EMIM or C2MIm	OAc	[EMIM][OAc]	1-ethyl-3-methylimidazolium acetate	C8H14N2O2	333.15	1.49015	train	1																				3	1						3	1								1
45	333	02003-06003	EMIM or C2MIm	OAc	[EMIM][OAc]	1-ethyl-3-methylimidazolium acetate	C8H14N2O2	338.15	1.48876	train	1																				3	1						3	1								1
45	334	02003-06003	EMIM or C2MIm	OAc	[EMIM][OAc]	1-ethyl-3-methylimidazolium acetate	C8H14N2O2	343.15	1.48734	train	1																				3	1						3	1								1
21	335	02003-06003	EMIM or C2MIm	OAc	[EMIM][OAc]	1-ethyl-3-methylimidazolium acetate	C8H14N2O2	298.15	1.4771	test	1																				3	1						3	1								1
46	336	02003-06003	EMIM or C2MIm	OAc	[EMIM][OAc]	1-ethyl-3-methylimidazolium acetate	C8H14N2O2	298.15	1.50069	train	1																				3	1						3	1								1
46	337	02003-06003	EMIM or C2MIm	OAc	[EMIM][OAc]	1-ethyl-3-methylimidazolium acetate	C8H14N2O2	298.15	1.49372	train	1																				3	1						3	1								1
47	338	02003-06009	EMIM or C2MIm	Gly	[EMIM][Gly]	1-ethyl-3-methylimidazolium glycine	C8H15N3O2	293.15	1.50628	train	1																				2	2						3			1					1	1
47	339	02003-06009	EMIM or C2MIm	Gly	[EMIM][Gly]	1-ethyl-3-methylimidazolium glycine	C8H15N3O2	298.15	1.50473	train	1																				2	2						3			1					1	1
47	340	02003-06009	EMIM or C2MIm	Gly	[EMIM][Gly]	1-ethyl-3-methylimidazolium glycine	C8H15N3O2	303.15	1.50313	test	1																				2	2						3			1					1	1
47	341	02003-06009	EMIM or C2MIm	Gly	[EMIM][Gly]	1-ethyl-3-methylimidazolium glycine	C8H15N3O2	308.15	1.50154	train	1																				2	2						3			1					1	1
47	342	02003-06009	EMIM or C2MIm	Gly	[EMIM][Gly]	1-ethyl-3-methylimidazolium glycine	C8H15N3O2	313.15	1.49988	train	1																				2	2						3			1					1	1
47	343	02003-06009	EMIM or C2MIm	Gly	[EMIM][Gly]	1-ethyl-3-methylimidazolium glycine	C8H15N3O2	318.15	1.49827	train	1																				2	2						3			1					1	1
47	344	02003-06009	EMIM or C2MIm	Gly	[EMIM][Gly]	1-ethyl-3-methylimidazolium glycine	C8H15N3O2	323.15	1.49657	train	1																				2	2						3			1					1	1
47	345	02003-06009	EMIM or C2MIm	Gly	[EMIM][Gly]	1-ethyl-3-methylimidazolium glycine	C8H15N3O2	328.15	1.49488	test	1																				2	2						3			1					1	1
47	346	02003-06009	EMIM or C2MIm	Gly	[EMIM][Gly]	1-ethyl-3-methylimidazolium glycine	C8H15N3O2	333.15	1.49321	train	1																				2	2						3			1					1	1
47	347	02003-06010	EMIM or C2MIm	Ala	[EMIM][Ala]	1-ethyl-3-methylimidazolium alanine	C9H17N3O2	293.15	1.50586	train	1																				3	1	1					3	1	1						1	1
47	348	02003-06010	EMIM or C2MIm	Ala	[EMIM][Ala]	1-ethyl-3-methylimidazolium alanine	C9H17N3O2	298.15	1.5041	train	1																				3	1	1					3	1	1						1	1
47	349	02003-06010	EMIM or C2MIm	Ala	[EMIM][Ala]	1-ethyl-3-methylimidazolium alanine	C9H17N3O2	303.15	1.50246	train	1																				3	1	1					3	1	1						1	1
47	350	02003-06010	EMIM or C2MIm	Ala	[EMIM][Ala]	1-ethyl-3-methylimidazolium alanine	C9H17N3O2	308.15	1.50072	test	1																				3	1	1					3	1	1						1	1
47	351	02003-06010	EMIM or C2MIm	Ala	[EMIM][Ala]	1-ethyl-3-methylimidazolium alanine	C9H17N3O2	313.15	1.49908	train	1																				3	1	1					3	1	1						1	1
47	352	02003-06010	EMIM or C2MIm	Ala	[EMIM][Ala]	1-ethyl-3-methylimidazolium alanine	C9H17N3O2	318.15	1.49735	train	1																				3	1	1					3	1	1						1	1
47	353	02003-06010	EMIM or C2MIm	Ala	[EMIM][Ala]	1-ethyl-3-methylimidazolium alanine	C9H17N3O2	323.15	1.49568	train	1																				3	1	1					3	1	1						1	1
47	354	02003-06010	EMIM or C2MIm	Ala	[EMIM][Ala]	1-ethyl-3-methylimidazolium alanine	C9H17N3O2	328.15	1.49395	train	1																				3	1	1					3	1	1						1	1
47	355	02003-06010	EMIM or C2MIm	Ala	[EMIM][Ala]	1-ethyl-3-methylimidazolium alanine	C9H17N3O2	333.15	1.49228	test	1																				3	1	1					3	1	1						1	1
47	356	02003-06014	EMIM or C2MIm	Ser	[EMIM][Ser]	1-ethyl-3-methylimidazolium serine	C9H17N3O3	293.15	1.51205	train	1																				2	2	1					3			2					1	1
47	357	02003-06014	EMIM or C2MIm	Ser	[EMIM][Ser]	1-ethyl-3-methylimidazolium serine	C9H17N3O3	298.15	1.51069	train	1																				2	2	1					3			2					1	1
47	358	02003-06014	EMIM or C2MIm	Ser	[EMIM][Ser]	1-ethyl-3-methylimidazolium serine	C9H17N3O3	303.15	1.50932	train	1																				2	2	1					3			2					1	1
47	359	02003-06014	EMIM or C2MIm	Ser	[EMIM][Ser]	1-ethyl-3-methylimidazolium serine	C9H17N3O3	308.15	1.50791	train	1																				2	2	1					3			2					1	1
47	360	02003-06014	EMIM or C2MIm	Ser	[EMIM][Ser]	1-ethyl-3-methylimidazolium serine	C9H17N3O3	313.15	1.50654	test	1																				2	2	1					3			2					1	1
47	361	02003-06014	EMIM or C2MIm	Ser	[EMIM][Ser]	1-ethyl-3-methylimidazolium serine	C9H17N3O3	318.15	1.50511	train	1																				2	2	1					3			2					1	1
47	362	02003-06014	EMIM or C2MIm	Ser	[EMIM][Ser]	1-ethyl-3-methylimidazolium serine	C9H17N3O3	323.15	1.50372	train	1																				2	2	1					3			2					1	1
47	363	02003-06014	EMIM or C2MIm	Ser	[EMIM][Ser]	1-ethyl-3-methylimidazolium serine	C9H17N3O3	328.15	1.50224	train	1																				2	2	1					3			2					1	1
47	364	02003-06014	EMIM or C2MIm	Ser	[EMIM][Ser]	1-ethyl-3-methylimidazolium serine	C9H17N3O3	333.15	1.50083	train	1																				2	2	1					3			2					1	1
47	365	02003-06025	EMIM or C2MIm	Pro	[EMIM][Pro]	1-ethyl-3-methylimidazolium proline	C11H19N3O2	293.15	1.51523	test	1																		1		2	1						11	1		1						1
47	366	02003-06025	EMIM or C2MIm	Pro	[EMIM][Pro]	1-ethyl-3-methylimidazolium proline	C11H19N3O2	298.15	1.51372	train	1																		1		2	1						11	1		1						1
47	367	02003-06025	EMIM or C2MIm	Pro	[EMIM][Pro]	1-ethyl-3-methylimidazolium proline	C11H19N3O2	303.15	1.51229	train	1																		1		2	1						11	1		1						1
47	368	02003-06025	EMIM or C2MIm	Pro	[EMIM][Pro]	1-ethyl-3-methylimidazolium proline	C11H19N3O2	308.15	1.51073	train	1																		1		2	1						11	1		1						1
47	369	02003-06025	EMIM or C2MIm	Pro	[EMIM][Pro]	1-ethyl-3-methylimidazolium proline	C11H19N3O2	313.15	1.50924	train	1																		1		2	1						11	1		1						1
47	370	02003-06025	EMIM or C2MIm	Pro	[EMIM][Pro]	1-ethyl-3-methylimidazolium proline	C11H19N3O2	318.15	1.50774	test	1																		1		2	1						11	1		1						1
47	371	02003-06025	EMIM or C2MIm	Pro	[EMIM][Pro]	1-ethyl-3-methylimidazolium proline	C11H19N3O2	323.15	1.50621	train	1																		1		2	1						11	1		1						1
47	372	02003-06025	EMIM or C2MIm	Pro	[EMIM][Pro]	1-ethyl-3-methylimidazolium proline	C11H19N3O2	328.15	1.50454	train	1																		1		2	1						11	1		1						1
47	373	02003-06025	EMIM or C2MIm	Pro	[EMIM][Pro]	1-ethyl-3-methylimidazolium proline	C11H19N3O2	333.15	1.5031	train	1																		1		2	1						11	1		1						1
18	374	02003-15003	EMIM or C2MIm	SCN	[EMIM][SCN]	1-ethyl-3-methyl imidazolium thiocyanate	C7H11N3S	332.55	1.53909	train	1															1					2	1						3					1
18	375	02003-15003	EMIM or C2MIm	SCN	[EMIM][SCN]	1-ethyl-3-methyl imidazolium thiocyanate	C7H11N3S	334.52	1.5385	test	1															1					2	1						3					1
18	376	02003-15003	EMIM or C2MIm	SCN	[EMIM][SCN]	1-ethyl-3-methyl imidazolium thiocyanate	C7H11N3S	336.48	1.53794	train	1															1					2	1						3					1
18	377	02003-15003	EMIM or C2MIm	SCN	[EMIM][SCN]	1-ethyl-3-methyl imidazolium thiocyanate	C7H11N3S	338.44	1.53739	train	1															1					2	1						3					1
18	378	02003-15003	EMIM or C2MIm	SCN	[EMIM][SCN]	1-ethyl-3-methyl imidazolium thiocyanate	C7H11N3S	340.41	1.53682	train	1															1					2	1						3					1
18	379	02003-15003	EMIM or C2MIm	SCN	[EMIM][SCN]	1-ethyl-3-methyl imidazolium thiocyanate	C7H11N3S	342.37	1.53636	train	1															1					2	1						3					1
18	380	02003-15003	EMIM or C2MIm	SCN	[EMIM][SCN]	1-ethyl-3-methyl imidazolium thiocyanate	C7H11N3S	298.15	1.54871	test	1															1					2	1						3					1
11	381	02003-15003	EMIM or C2MIm	SCN	[EMIM][SCN]	1-ethyl-3-methylimidazolium thiocyanate	C7H11N3S	283	1.556	train	1															1					2	1						3					1
11	382	02003-15003	EMIM or C2MIm	SCN	[EMIM][SCN]	1-ethyl-3-methylimidazolium thiocyanate	C7H11N3S	288	1.5545	train	1															1					2	1						3					1
11	383	02003-15003	EMIM or C2MIm	SCN	[EMIM][SCN]	1-ethyl-3-methylimidazolium thiocyanate	C7H11N3S	293	1.55299	train	1															1					2	1						3					1
11	384	02003-15003	EMIM or C2MIm	SCN	[EMIM][SCN]	1-ethyl-3-methylimidazolium thiocyanate	C7H11N3S	298	1.55149	train	1															1					2	1						3					1
11	385	02003-15003	EMIM or C2MIm	SCN	[EMIM][SCN]	1-ethyl-3-methylimidazolium thiocyanate	C7H11N3S	303	1.54999	test	1															1					2	1						3					1
11	386	02003-15003	EMIM or C2MIm	SCN	[EMIM][SCN]	1-ethyl-3-methylimidazolium thiocyanate	C7H11N3S	308	1.5485	train	1															1					2	1						3					1
11	387	02003-15003	EMIM or C2MIm	SCN	[EMIM][SCN]	1-ethyl-3-methylimidazolium thiocyanate	C7H11N3S	313	1.54702	train	1															1					2	1						3					1
11	388	02003-15003	EMIM or C2MIm	SCN	[EMIM][SCN]	1-ethyl-3-methylimidazolium thiocyanate	C7H11N3S	318	1.54557	train	1															1					2	1						3					1
11	389	02003-15003	EMIM or C2MIm	SCN	[EMIM][SCN]	1-ethyl-3-methylimidazolium thiocyanate	C7H11N3S	323	1.54409	train	1															1					2	1						3					1
11	390	02003-15003	EMIM or C2MIm	SCN	[EMIM][SCN]	1-ethyl-3-methylimidazolium thiocyanate	C7H11N3S	328	1.54263	test	1															1					2	1						3					1
11	391	02003-15003	EMIM or C2MIm	SCN	[EMIM][SCN]	1-ethyl-3-methylimidazolium thiocyanate	C7H11N3S	333	1.54119	train	1															1					2	1						3					1
11	392	02003-15003	EMIM or C2MIm	SCN	[EMIM][SCN]	1-ethyl-3-methylimidazolium thiocyanate	C7H11N3S	338	1.53973	train	1															1					2	1						3					1
11	393	02003-15003	EMIM or C2MIm	SCN	[EMIM][SCN]	1-ethyl-3-methylimidazolium thiocyanate	C7H11N3S	343	1.53831	train	1															1					2	1						3					1
11	394	02003-15003	EMIM or C2MIm	SCN	[EMIM][SCN]	1-ethyl-3-methylimidazolium thiocyanate	C7H11N3S	348	1.53687	train	1															1					2	1						3					1
11	395	02003-15003	EMIM or C2MIm	SCN	[EMIM][SCN]	1-ethyl-3-methylimidazolium thiocyanate	C7H11N3S	353	1.53545	test	1															1					2	1						3					1
11	396	02003-15005	EMIM or C2MIm	B(CN)4	[EMIM][B(CN)4]	1-ethyl-3-methylimidazolium tetracyanoborate	C10H11BN6	283	1.45284	train	1															4					2	1						3
11	397	02003-15005	EMIM or C2MIm	B(CN)4	[EMIM][B(CN)4]	1-ethyl-3-methylimidazolium tetracyanoborate	C10H11BN6	288	1.45108	train	1															4					2	1						3
11	398	02003-15005	EMIM or C2MIm	B(CN)4	[EMIM][B(CN)4]	1-ethyl-3-methylimidazolium tetracyanoborate	C10H11BN6	293	1.44936	train	1															4					2	1						3
11	399	02003-15005	EMIM or C2MIm	B(CN)4	[EMIM][B(CN)4]	1-ethyl-3-methylimidazolium tetracyanoborate	C10H11BN6	298	1.44763	train	1															4					2	1						3
11	400	02003-15005	EMIM or C2MIm	B(CN)4	[EMIM][B(CN)4]	1-ethyl-3-methylimidazolium tetracyanoborate	C10H11BN6	303	1.44592	test	1															4					2	1						3
11	401	02003-15005	EMIM or C2MIm	B(CN)4	[EMIM][B(CN)4]	1-ethyl-3-methylimidazolium tetracyanoborate	C10H11BN6	308	1.44421	train	1															4					2	1						3
11	402	02003-15005	EMIM or C2MIm	B(CN)4	[EMIM][B(CN)4]	1-ethyl-3-methylimidazolium tetracyanoborate	C10H11BN6	313	1.44252	train	1															4					2	1						3
11	403	02003-15005	EMIM or C2MIm	B(CN)4	[EMIM][B(CN)4]	1-ethyl-3-methylimidazolium tetracyanoborate	C10H11BN6	318	1.44081	train	1															4					2	1						3
11	404	02003-15005	EMIM or C2MIm	B(CN)4	[EMIM][B(CN)4]	1-ethyl-3-methylimidazolium tetracyanoborate	C10H11BN6	323	1.43913	train	1															4					2	1						3
11	405	02003-15005	EMIM or C2MIm	B(CN)4	[EMIM][B(CN)4]	1-ethyl-3-methylimidazolium tetracyanoborate	C10H11BN6	328	1.43745	test	1															4					2	1						3
11	406	02003-15005	EMIM or C2MIm	B(CN)4	[EMIM][B(CN)4]	1-ethyl-3-methylimidazolium tetracyanoborate	C10H11BN6	333	1.43578	train	1															4					2	1						3
11	407	02003-15005	EMIM or C2MIm	B(CN)4	[EMIM][B(CN)4]	1-ethyl-3-methylimidazolium tetracyanoborate	C10H11BN6	338	1.43412	train	1															4					2	1						3
11	408	02003-15005	EMIM or C2MIm	B(CN)4	[EMIM][B(CN)4]	1-ethyl-3-methylimidazolium tetracyanoborate	C10H11BN6	343	1.43248	train	1															4					2	1						3
11	409	02003-15005	EMIM or C2MIm	B(CN)4	[EMIM][B(CN)4]	1-ethyl-3-methylimidazolium tetracyanoborate	C10H11BN6	348	1.43085	train	1															4					2	1						3
11	410	02003-15005	EMIM or C2MIm	B(CN)4	[EMIM][B(CN)4]	1-ethyl-3-methylimidazolium tetracyanoborate	C10H11BN6	353	1.42922	test	1															4					2	1						3
2	411	02007-03001	DEIM	TFSI	[DEIM][TFSI]	1,3-diethylimidazolium bis((trifluoromethyl)sulfonyl)imide	C9H13F6N3O4S2	298.15	1.426	train	1																2				2	2						3							1				2
2	412	02007-04003	DEIM	TfO	[DEIM][TfO]	1,3-diethylimidazolium trifluoromethanesulfonate	C8H13F3N2O3S	298.15	1.4367	train	1																1				2	2						3	1										1
48	413	02008-02001	C3MIM	BF4	[C3MIM][BF4]	1-propyl-3-methylimidazolium tetrafluoroborate	C7H13BF4N2	298.15	1.4165	train	1									1											2	2						3
48	414	02008-02001	C3MIM	BF4	[C3MIM][BF4]	1-propyl-3-methylimidazolium tetrafluoroborate	C7H13BF4N2	303.15	1.4153	train	1									1											2	2						3
48	415	02008-02001	C3MIM	BF4	[C3MIM][BF4]	1-propyl-3-methylimidazolium tetrafluoroborate	C7H13BF4N2	308.15	1.4142	test	1									1											2	2						3
48	416	02008-02001	C3MIM	BF4	[C3MIM][BF4]	1-propyl-3-methylimidazolium tetrafluoroborate	C7H13BF4N2	313.15	1.4132	train	1									1											2	2						3
48	417	02008-02001	C3MIM	BF4	[C3MIM][BF4]	1-propyl-3-methylimidazolium tetrafluoroborate	C7H13BF4N2	318.15	1.412	train	1									1											2	2						3
48	418	02008-02001	C3MIM	BF4	[C3MIM][BF4]	1-propyl-3-methylimidazolium tetrafluoroborate	C7H13BF4N2	323.15	1.411	train	1									1											2	2						3
48	419	02008-02001	C3MIM	BF4	[C3MIM][BF4]	1-propyl-3-methylimidazolium tetrafluoroborate	C7H13BF4N2	328.15	1.4098	train	1									1											2	2						3
48	420	02008-02001	C3MIM	BF4	[C3MIM][BF4]	1-propyl-3-methylimidazolium tetrafluoroborate	C7H13BF4N2	333.15	1.4086	test	1									1											2	2						3
48	421	02008-02001	C3MIM	BF4	[C3MIM][BF4]	1-propyl-3-methylimidazolium tetrafluoroborate	C7H13BF4N2	338.15	1.4075	train	1									1											2	2						3
49	422	02008-03001	C3MIM	TFSI	[C3MIM][TFSI]	1-propyl-3-methylimidazolium bis((trifluoromethyl)sulfonyl)imide	C9H13F6N3O4S2	298.15	1.42525	train	1																				3	3	1					3	1	1						1	1
50	423	02008-03001	C3MIM	TFSI	[C3MIM][TFSI]	1-methyl-3-propylimidazolium bis[(trifluoromethyl)sulfonyl]amide	C9H13F6N3O4S2	293.15	1.42669	train	1																2				2	2						3							1				2
50	424	02008-03001	C3MIM	TFSI	[C3MIM][TFSI]	1-methyl-3-propylimidazolium bis[(trifluoromethyl)sulfonyl]amide	C9H13F6N3O4S2	298.15	1.42525	train	1																2				2	2						3							1				2
50	425	02008-03001	C3MIM	TFSI	[C3MIM][TFSI]	1-methyl-3-propylimidazolium bis[(trifluoromethyl)sulfonyl]amide	C9H13F6N3O4S2	303.15	1.42378	test	1																2				2	2						3							1				2
50	426	02008-03001	C3MIM	TFSI	[C3MIM][TFSI]	1-methyl-3-propylimidazolium bis[(trifluoromethyl)sulfonyl]amide	C9H13F6N3O4S2	308.15	1.42224	train	1																2				2	2						3							1				2
50	427	02008-03001	C3MIM	TFSI	[C3MIM][TFSI]	1-methyl-3-propylimidazolium bis[(trifluoromethyl)sulfonyl]amide	C9H13F6N3O4S2	313.15	1.42076	train	1																2				2	2						3							1				2
50	428	02008-03001	C3MIM	TFSI	[C3MIM][TFSI]	1-methyl-3-propylimidazolium bis[(trifluoromethyl)sulfonyl]amide	C9H13F6N3O4S2	318.15	1.41926	train	1																2				2	2						3							1				2
50	429	02008-03001	C3MIM	TFSI	[C3MIM][TFSI]	1-methyl-3-propylimidazolium bis[(trifluoromethyl)sulfonyl]amide	C9H13F6N3O4S2	323.15	1.41776	train	1																2				2	2						3							1				2
50	430	02008-03001	C3MIM	TFSI	[C3MIM][TFSI]	1-methyl-3-propylimidazolium bis[(trifluoromethyl)sulfonyl]amide	C9H13F6N3O4S2	328.15	1.41625	test	1																2				2	2						3							1				2
50	431	02008-03001	C3MIM	TFSI	[C3MIM][TFSI]	1-methyl-3-propylimidazolium bis[(trifluoromethyl)sulfonyl]amide	C9H13F6N3O4S2	333.15	1.41479	train	1																2				2	2						3							1				2
50	432	02008-03001	C3MIM	TFSI	[C3MIM][TFSI]	1-methyl-3-propylimidazolium bis[(trifluoromethyl)sulfonyl]amide	C9H13F6N3O4S2	338.15	1.41334	train	1																2				2	2						3							1				2
50	433	02008-03001	C3MIM	TFSI	[C3MIM][TFSI]	1-methyl-3-propylimidazolium bis[(trifluoromethyl)sulfonyl]amide	C9H13F6N3O4S2	343.15	1.41185	train	1																2				2	2						3							1				2
51	434	02008-03001	C3MIM	TFSI	[C3MIM][TFSI]	1-methyl-3-propylimidazolium bis[(trifluoromethyl)sulfonyl]imide	C9H13F6N3O4S2	298.15	1.42516	train	1																2				2	2						3							1				2
15	435	02008-03001	C3MIM	TFSI	[C3MIM][TFSI]	1-methyl-3-propylimidazolium bis[(trifluoromethyl)sulfonyl]amide	C9H13F6N3O4S2	298.15	1.4252	test	1																2				2	2						3							1				2
52	436	02008-04017	C3MIM	MeSO4	[C3MIM][MeSO4]	1-propyl-3-methylimidazolium methylsulfate	C8H16N2O4S	298.15	1.4761	train	1																1				3	2						3	2
52	437	02008-04017	C3MIM	MeSO4	[C3MIM][MeSO4]	1-propyl-3-methylimidazolium methylsulfate	C8H16N2O4S	308.15	1.4725	train	1																1				3	2						3	2
52	438	02008-04017	C3MIM	MeSO4	[C3MIM][MeSO4]	1-propyl-3-methylimidazolium methylsulfate	C8H16N2O4S	318.15	1.4701	train	1																1				3	2						3	2
52	439	02008-04017	C3MIM	MeSO4	[C3MIM][MeSO4]	1-propyl-3-methylimidazolium methylsulfate	C8H16N2O4S	328.15	1.4664	train	1																1				3	2						3	2
6	440	02011-01001	C4MIm or BMIM	Cl	[BMIM]Cl	1-butyl-3-methylimidazolium chloride	C8H15ClN2	288.15	1.46516	test	1											1									2	3						3
6	441	02011-01001	C4MIm or BMIM	Cl	[BMIM]Cl	1-butyl-3-methylimidazolium chloride	C8H15ClN2	298.15	1.46064	train	1											1									2	3						3
6	442	02011-01001	C4MIm or BMIM	Cl	[BMIM]Cl	1-butyl-3-methylimidazolium chloride	C8H15ClN2	308.15	1.45595	train	1											1									2	3						3
6	443	02011-01001	C4MIm or BMIM	Cl	[BMIM]Cl	1-butyl-3-methylimidazolium chloride	C8H15ClN2	318.15	1.45219	train	1											1									2	3						3
53	444	02011-01002	C4MIm or BMIM	Br	[BMIM]Br	1-butyl-3-methylimidazolium bromide	C8H15BrN2	298.15	1.5353	train	1												1								2	3						3
53	445	02011-01002	C4MIm or BMIM	Br	[BMIM]Br	1-butyl-4-methylimidazolium bromide	C8H15BrN3	308.15	1.5326	test	1												1								2	3						3
53	446	02011-01002	C4MIm or BMIM	Br	[BMIM]Br	1-butyl-4-methylimidazolium bromide	C8H15BrN3	298.15	1.3973	train	1												1								2	3						3
53	447	02011-01002	C4MIm or BMIM	Br	[BMIM]Br	1-butyl-4-methylimidazolium bromide	C8H15BrN3	308.15	1.3932	train	1												1								2	3						3
54	448	02011-01003	C4MIm or BMIM	I	[BMIM]I	1-butyl-3-methylimidazolium iodine	C8H15IN3	298.15	1.572	train	1													1							2	3						3
55	449	02011-01005	C4MIm or BMIM	ICl2	[BMIM][ICl2]	1-butyl-3-methylimidazolium dichloro- iodide	C8H15Cl2IN2	298.15	1.658	train	1											2		1							2	3						3
55	450	02011-01005	C4MIm or BMIM	ICl2	[BMIM][ICl2]	1-butyl-3-methylimidazolium dichloro- iodide	C8H15Cl2IN2	298.15	1.61	test	1											2		1							2	3						3
55	451	02011-01007	C4MIm or BMIM	Br3	[BMIM][Br3]	1-butyl-3-methylimidazolium tribromide	C8H15Br3N2	298.15	1.659	train	1												3								2	3						3
56	452	02011-02001	C4MIm or BMIM	BF4	[BMIM][BF4]	1-butyl-3-methylimidazolium tetrafluoroborate	C8H15BF4N2	298.2	1.4218	train	1									1											2	3						3
56	453	02011-02001	C4MIm or BMIM	BF4	[BMIM][BF4]	1-butyl-3-methylimidazolium tetrafluoroborate	C8H15BF4N2	299.2	1.4216	train	1									1											2	3						3
56	454	02011-02001	C4MIm or BMIM	BF4	[BMIM][BF4]	1-butyl-3-methylimidazolium tetrafluoroborate	C8H15BF4N2	300.2	1.4213	train	1									1											2	3						3
56	455	02011-02001	C4MIm or BMIM	BF4	[BMIM][BF4]	1-butyl-3-methylimidazolium tetrafluoroborate	C8H15BF4N2	301.2	1.4211	test	1									1											2	3						3
56	456	02011-02001	C4MIm or BMIM	BF4	[BMIM][BF4]	1-butyl-3-methylimidazolium tetrafluoroborate	C8H15BF4N2	302.2	1.4208	train	1									1											2	3						3
56	457	02011-02001	C4MIm or BMIM	BF4	[BMIM][BF4]	1-butyl-3-methylimidazolium tetrafluoroborate	C8H15BF4N2	303.2	1.4206	train	1									1											2	3						3
56	458	02011-02001	C4MIm or BMIM	BF4	[BMIM][BF4]	1-butyl-3-methylimidazolium tetrafluoroborate	C8H15BF4N2	304.2	1.4204	train	1									1											2	3						3
56	459	02011-02001	C4MIm or BMIM	BF4	[BMIM][BF4]	1-butyl-3-methylimidazolium tetrafluoroborate	C8H15BF4N2	305.2	1.4201	train	1									1											2	3						3
56	460	02011-02001	C4MIm or BMIM	BF4	[BMIM][BF4]	1-butyl-3-methylimidazolium tetrafluoroborate	C8H15BF4N2	306.2	1.4199	test	1									1											2	3						3
56	461	02011-02001	C4MIm or BMIM	BF4	[BMIM][BF4]	1-butyl-3-methylimidazolium tetrafluoroborate	C8H15BF4N2	307.2	1.4197	train	1									1											2	3						3
56	462	02011-02001	C4MIm or BMIM	BF4	[BMIM][BF4]	1-butyl-3-methylimidazolium tetrafluoroborate	C8H15BF4N2	308.2	1.4195	train	1									1											2	3						3
57	463	02011-02001	C4MIm or BMIM	BF4	[BMIM][BF4]	1-butyl-3-methylimidazolium tetrafluoroborate	C8H15BF4N2	298.15	1.4219	train	1									1											2	3						3
2	464	02011-02001	C4MIm or BMIM	BF4	[BMIM][BF4]	1-butyl-3-methylimidazolium tetrafluoroborate	C8H15BF4N2	298.15	1.429	train	1									1											2	3						3
58	465	02011-02001	C4MIm or BMIM	BF4	[BMIM][BF4]	1-butyl-3-methylimidazolium tetrafluoroborate	C8H15BF4N2	298.15	1.4251	test	1									1											2	3						3
13	466	02011-02001	C4MIm or BMIM	BF4	[BMIM][BF4]	1-butyl-3-methylimidazolium tetrafluoroborate	C8H15BF4N2	298	1.4215	train	1									1											2	3						3
59	467	02011-02001	C4MIm or BMIM	BF4	[BMIM][BF4]	1-butyl-3-methylimidazolium tetrafluoroborate	C8H15BF4N2	298.15	1.4208	train	1									1											2	3						3
59	468	02011-02001	C4MIm or BMIM	BF4	[BMIM][BF4]	1-butyl-3-methylimidazolium tetrafluoroborate	C8H15BF4N2	298.15	1.4219	train	1									1											2	3						3
7	469	02011-02001	C4MIm or BMIM	BF4	[BMIM][BF4]	1-butyl-3-methylimidazolium tetrafluoroborate	C8H15BF4N2	293.15	1.4155	train	1									1											2	3						3
13	470	02011-02001	C4MIm or BMIM	BF4	[BMIM][BF4]	1-butyl-3-methylimidazolium tetrafluoroborate	C8H15BF4N2	298	1.4215	test	1									1											2	3						3
10	471	02011-02001	C4MIm or BMIM	BF4	[BMIM][BF4]	1-butyl-3-methylimidazolium tetrafluoroborate	C8H15BF4N2	298.15	1.426	train	1									1											2	3						3
3	472	02011-02001	C4MIm or BMIM	BF4	[BMIM][BF4]	1-butyl-3-methylimidazolium tetrafluoroborate	C8H15BF4N2	298	1.4215	train	1									1											2	3						3
60	473	02011-02001	C4MIm or BMIM	BF4	[BMIM][BF4]	1-butyl-3-methylimidazolium tetrafluoroborate	C8H15BF4N2	298.15	1.4188	train	1									1											2	3						3
61	474	02011-02001	C4MIm or BMIM	BF4	[BMIM][BF4]	1-butyl-3-methylimidazolium tetrafluoroborate	C8H15BF4N2	293.15	1.42592	train	1									1											2	3						3
61	475	02011-02001	C4MIm or BMIM	BF4	[BMIM][BF4]	1-butyl-3-methylimidazolium tetrafluoroborate	C8H15BF4N2	298.15	1.42475	test	1									1											2	3						3
61	476	02011-02001	C4MIm or BMIM	BF4	[BMIM][BF4]	1-butyl-3-methylimidazolium tetrafluoroborate	C8H15BF4N2	303.15	1.42369	train	1									1											2	3						3
61	477	02011-02001	C4MIm or BMIM	BF4	[BMIM][BF4]	1-butyl-3-methylimidazolium tetrafluoroborate	C8H15BF4N2	313.15	1.42128	train	1									1											2	3						3
61	478	02011-02001	C4MIm or BMIM	BF4	[BMIM][BF4]	1-butyl-3-methylimidazolium tetrafluoroborate	C8H15BF4N2	323.15	1.419	train	1									1											2	3						3
61	479	02011-02001	C4MIm or BMIM	BF4	[BMIM][BF4]	1-butyl-3-methylimidazolium tetrafluoroborate	C8H15BF4N2	333.15	1.41656	train	1									1											2	3						3
61	480	02011-02001	C4MIm or BMIM	BF4	[BMIM][BF4]	1-butyl-3-methylimidazolium tetrafluoroborate	C8H15BF4N2	343.15	1.41388	test	1									1											2	3						3
61	481	02011-02001	C4MIm or BMIM	BF4	[BMIM][BF4]	1-butyl-3-methylimidazolium tetrafluoroborate	C8H15BF4N2	353.15	1.41135	train	1									1											2	3						3
61	482	02011-02001	C4MIm or BMIM	BF4	[BMIM][BF4]	1-butyl-3-methylimidazolium tetrafluoroborate	C8H15BF4N2	293.15	1.42592	train	1									1											2	3						3
61	483	02011-02001	C4MIm or BMIM	BF4	[BMIM][BF4]	1-butyl-3-methylimidazolium tetrafluoroborate	C8H15BF4N2	298.15	1.42475	train	1									1											2	3						3
61	484	02011-02001	C4MIm or BMIM	BF4	[BMIM][BF4]	1-butyl-3-methylimidazolium tetrafluoroborate	C8H15BF4N2	303.15	1.42369	train	1									1											2	3						3
61	485	02011-02001	C4MIm or BMIM	BF4	[BMIM][BF4]	1-butyl-3-methylimidazolium tetrafluoroborate	C8H15BF4N2	313.15	1.42128	test	1									1											2	3						3
61	486	02011-02001	C4MIm or BMIM	BF4	[BMIM][BF4]	1-butyl-3-methylimidazolium tetrafluoroborate	C8H15BF4N2	323.15	1.419	train	1									1											2	3						3
61	487	02011-02001	C4MIm or BMIM	BF4	[BMIM][BF4]	1-butyl-3-methylimidazolium tetrafluoroborate	C8H15BF4N2	333.15	1.41656	train	1									1											2	3						3
61	488	02011-02001	C4MIm or BMIM	BF4	[BMIM][BF4]	1-butyl-3-methylimidazolium tetrafluoroborate	C8H15BF4N2	343.15	1.41388	train	1									1											2	3						3
61	489	02011-02001	C4MIm or BMIM	BF4	[BMIM][BF4]	1-butyl-3-methylimidazolium tetrafluoroborate	C8H15BF4N2	353.15	1.41135	train	1									1											2	3						3
62	490	02011-02001	C4MIm or BMIM	BF4	[BMIM][BF4]	1-butyl-3-methylimidazolium tetrafluoroborate	C8H15BF4N2	292.99	1.4207	test	1									1											2	3						3
62	491	02011-02001	C4MIm or BMIM	BF4	[BMIM][BF4]	1-butyl-3-methylimidazolium tetrafluoroborate	C8H15BF4N2	298.14	1.4194	train	1									1											2	3						3
62	492	02011-02001	C4MIm or BMIM	BF4	[BMIM][BF4]	1-butyl-3-methylimidazolium tetrafluoroborate	C8H15BF4N2	300.94	1.4187	train	1									1											2	3						3
62	493	02011-02001	C4MIm or BMIM	BF4	[BMIM][BF4]	1-butyl-3-methylimidazolium tetrafluoroborate	C8H15BF4N2	303.06	1.4182	train	1									1											2	3						3
62	494	02011-02001	C4MIm or BMIM	BF4	[BMIM][BF4]	1-butyl-3-methylimidazolium tetrafluoroborate	C8H15BF4N2	307.96	1.4169	train	1									1											2	3						3
63	495	02011-02001	C4MIm or BMIM	BF4	[BMIM][BF4]	1-butyl-3-methylimidazolium tetrafluoroborate	C8H15BF4N2	313.15	1.42128	test	1									1											2	3						3
63	496	02011-02001	C4MIm or BMIM	BF4	[BMIM][BF4]	1-butyl-3-methylimidazolium tetrafluoroborate	C8H15BF4N2	323.15	1.419	train	1									1											2	3						3
63	497	02011-02001	C4MIm or BMIM	BF4	[BMIM][BF4]	1-butyl-3-methylimidazolium tetrafluoroborate	C8H15BF4N2	333.15	1.41656	train	1									1											2	3						3
63	498	02011-02001	C4MIm or BMIM	BF4	[BMIM][BF4]	1-butyl-3-methylimidazolium tetrafluoroborate	C8H15BF4N2	343.15	1.41388	train	1									1											2	3						3
63	499	02011-02001	C4MIm or BMIM	BF4	[BMIM][BF4]	1-butyl-3-methylimidazolium tetrafluoroborate	C8H15BF4N2	353.15	1.41135	train	1									1											2	3						3
64	500	02011-02001	C4MIm or BMIM	BF4	[BMIM][BF4]	1-butyl-3-methylimidazolium tetrafluoroborate	C8H15BF4N2	293.15	1.42275	test	1									1											2	3						3
64	501	02011-02001	C4MIm or BMIM	BF4	[BMIM][BF4]	1-butyl-3-methylimidazolium tetrafluoroborate	C8H15BF4N2	298.15	1.42145	train	1									1											2	3						3
64	502	02011-02001	C4MIm or BMIM	BF4	[BMIM][BF4]	1-butyl-3-methylimidazolium tetrafluoroborate	C8H15BF4N2	303.15	1.42016	train	1									1											2	3						3
64	503	02011-02001	C4MIm or BMIM	BF4	[BMIM][BF4]	1-butyl-3-methylimidazolium tetrafluoroborate	C8H15BF4N2	308.15	1.41884	train	1									1											2	3						3
64	504	02011-02001	C4MIm or BMIM	BF4	[BMIM][BF4]	1-butyl-3-methylimidazolium tetrafluoroborate	C8H15BF4N2	313.15	1.41753	train	1									1											2	3						3
64	505	02011-02001	C4MIm or BMIM	BF4	[BMIM][BF4]	1-butyl-3-methylimidazolium tetrafluoroborate	C8H15BF4N2	318.15	1.41622	test	1									1											2	3						3
64	506	02011-02001	C4MIm or BMIM	BF4	[BMIM][BF4]	1-butyl-3-methylimidazolium tetrafluoroborate	C8H15BF4N2	323.15	1.41486	train	1									1											2	3						3
12	507	02011-02001	C4MIm or BMIM	BF4	[BMIM][BF4]	1-butyl-3-methylimidazolium tetrafluoroborate	C8H15BF4N2	298.15	1.4215	train	1									1											2	3						3
12	508	02011-02001	C4MIm or BMIM	BF4	[BMIM][BF4]	1-butyl-3-methylimidazolium tetrafluoroborate	C8H15BF4N2	303.15	1.4202	train	1									1											2	3						3
12	509	02011-02001	C4MIm or BMIM	BF4	[BMIM][BF4]	1-butyl-3-methylimidazolium tetrafluoroborate	C8H15BF4N2	313.15	1.4179	train	1									1											2	3						3
12	510	02011-02001	C4MIm or BMIM	BF4	[BMIM][BF4]	1-butyl-3-methylimidazolium tetrafluoroborate	C8H15BF4N2	323.15	1.4153	test	1									1											2	3						3
2	511	02011-03001	C4MIm or BMIM	TFSI	[BMIM][TFSI ]	1-butyl-3-methylimidazolium bis((trifluoromethyl)sulfonyl)imide	C10H15F6N3O4S2	298.15	1.4271	train	1																2				2	3						3							1				2
2	512	02011-03001	C4MIm or BMIM	TFSI	[BMIM][TFSI ]	1-butyl-3-methylimidazolium bis((trifluoromethyl)sulfonyl)imide	C10H15F6N3O4S2	298.15	1.411	train	1																2				2	3						3							1				2
65	513	02011-03001	C4MIm or BMIM	TFSI	[BMIM][TFSI ]	1-butyl-3-methylimidazolium bis((trifluoromethyl)sulfonyl)imide	C10H15F6N3O4S2	298.15	1.42692	train	1																2				2	3						3							1				2
65	514	02011-03001	C4MIm or BMIM	TFSI	[BMIM][TFSI ]	1-butyl-3-methylimidazolium bis((trifluoromethyl)sulfonyl)imide	C10H15F6N3O4S2	298.15	1.427	train	1																2				2	3						3							1				2
13	515	02011-03001	C4MIm or BMIM	TFSI	[BMIM][TFSI ]	1-butyl-3-methylimidazolium bis((trifluoromethyl)sulfonyl)imide	C10H15F6N3O4S2	298	1.4265	test	1																2				2	3						3							1				2
65	516	02011-03001	C4MIm or BMIM	TFSI	[BMIM][TFSI ]	1-butyl-3-methylimidazolium bis((trifluoromethyl)sulfonyl)imide	C10H15F6N3O4S2	298.15	1.42692	train	1																2				2	3						3							1				2
66	517	02011-03001	C4MIm or BMIM	TFSI	[BMIM][TFSI ]	1-butyl-3-methylimidazolium bis((trifluoromethyl)sulfonyl)imide	C10H15F6N3O4S2	298.15	1.427	train	1																2				2	3						3							1				2
13	518	02011-03001	C4MIm or BMIM	TFSI	[BMIM][TFSI ]	1-butyl-3-methylimidazolium bis((trifluoromethyl)sulfonyl)imide	C10H15F6N3O4S2	298	1.4265	train	1																2				2	3						3							1				2
10	519	02011-03001	C4MIm or BMIM	TFSI	[BMIM][TFSI ]	1-butyl-3-methylimidazolium bis((trifluoromethyl)sulfonyl)imide	C10H15F6N3O4S2	298.15	1.431	train	1																2				2	3						3							1				2
3	520	02011-03001	C4MIm or BMIM	TFSI	[BMIM][TFSI ]	1-butyl-3-methylimidazolium bis((trifluoromethyl)sulfonyl)imide	C10H15F6N3O4S2	298	1.428	test	1																2				2	3						3							1				2
49	521	02011-03001	C4MIm or BMIM	TFSI	[BMIM][TFSI ]	1-butyl-3-methylimidazolium bis((trifluoromethyl)sulfonyl)imide	C10H15F6N3O4S2	298.15	1.42706	train	1																2				2	3						3							1				2
15	522	02011-03001	C4MIm or BMIM	TFSI	[BMIM][TFSI ]	1-butyl-3-methylimidazolium bis((trifluoromethyl)sulfonyl)imide	C10H15F6N3O4S2	298.15	1.427	train	1																2				2	3						3							1				2
67	523	02011-03001	C4MIm or BMIM	TFSI	[BMIM][TFSI ]	1-butyl-3-methylimidazolium bis((trifluoromethyl)sulfonyl)imide	C10H15F6N3O4S2	298.15	1.4265	train	1																2				2	3						3							1				2
68	524	02011-03004	C4MIm or BMIM	dca	[BMIM][dca]	1-butyl-3-methylimidazolium dicyanamide	C10H15N5	288.15	1.51213	train	1															2					2	3						3							1
68	525	02011-03004	C4MIm or BMIM	dca	[BMIM][dca]	1-butyl-3-methylimidazolium dicyanamide	C10H15N5	298.15	1.50893	test	1															2					2	3						3							1
68	526	02011-03004	C4MIm or BMIM	dca	[BMIM][dca]	1-butyl-3-methylimidazolium dicyanamide	C10H15N5	308.15	1.50578	train	1															2					2	3						3							1
19	527	02011-03028	C4MIm or BMIM	C(CN)3	[BMIM][C(CN)3]	1-butyl-3-methylimidazolium tricyanomethide	C12H15N5	283.15	1.5127	train	1															3					2	3		1				3
19	528	02011-03028	C4MIm or BMIM	C(CN)3	[BMIM][C(CN)3]	1-butyl-3-methylimidazolium tricyanomethide	C12H15N5	293.15	1.5102	train	1															3					2	3		1				3
19	529	02011-03028	C4MIm or BMIM	C(CN)3	[BMIM][C(CN)3]	1-butyl-3-methylimidazolium tricyanomethide	C12H15N5	303.15	1.5071	train	1															3					2	3		1				3
19	530	02011-03028	C4MIm or BMIM	C(CN)3	[BMIM][C(CN)3]	1-butyl-3-methylimidazolium tricyanomethide	C12H15N5	313.15	1.5038	test	1															3					2	3		1				3
56	531	02011-04003	C4MIm or BMIM	TfO	[BMIM][TfO]	1-butyl-3-methylimidazolium trifluoromethanesulfonate	C9H15F3N2O3S	298.2	1.4368	train	1																1				2	3						3	1										1
56	532	02011-04003	C4MIm or BMIM	TfO	[BMIM][TfO]	1-butyl-3-methylimidazolium trifluoromethanesulfonate	C9H15F3N2O3S	299.2	1.4366	train	1																1				2	3						3	1										1
56	533	02011-04003	C4MIm or BMIM	TfO	[BMIM][TfO]	1-butyl-3-methylimidazolium trifluoromethanesulfonate	C9H15F3N2O3S	300.2	1.4364	train	1																1				2	3						3	1										1
56	534	02011-04003	C4MIm or BMIM	TfO	[BMIM][TfO]	1-butyl-3-methylimidazolium trifluoromethanesulfonate	C9H15F3N2O3S	301.2	1.4362	train	1																1				2	3						3	1										1
56	535	02011-04003	C4MIm or BMIM	TfO	[BMIM][TfO]	1-butyl-3-methylimidazolium trifluoromethanesulfonate	C9H15F3N2O3S	302.2	1.436	test	1																1				2	3						3	1										1
56	536	02011-04003	C4MIm or BMIM	TfO	[BMIM][TfO]	1-butyl-3-methylimidazolium trifluoromethanesulfonate	C9H15F3N2O3S	303.2	1.4357	train	1																1				2	3						3	1										1
56	537	02011-04003	C4MIm or BMIM	TfO	[BMIM][TfO]	1-butyl-3-methylimidazolium trifluoromethanesulfonate	C9H15F3N2O3S	304.2	1.4355	train	1																1				2	3						3	1										1
56	538	02011-04003	C4MIm or BMIM	TfO	[BMIM][TfO]	1-butyl-3-methylimidazolium trifluoromethanesulfonate	C9H15F3N2O3S	305.2	1.4352	train	1																1				2	3						3	1										1
56	539	02011-04003	C4MIm or BMIM	TfO	[BMIM][TfO]	1-butyl-3-methylimidazolium trifluoromethanesulfonate	C9H15F3N2O3S	306.2	1.435	train	1																1				2	3						3	1										1
56	540	02011-04003	C4MIm or BMIM	TfO	[BMIM][TfO]	1-butyl-3-methylimidazolium trifluoromethanesulfonate	C9H15F3N2O3S	307.2	1.4348	test	1																1				2	3						3	1										1
56	541	02011-04003	C4MIm or BMIM	TfO	[BMIM][TfO]	1-butyl-3-methylimidazolium trifluoromethanesulfonate	C9H15F3N2O3S	308.2	1.4346	train	1																1				2	3						3	1										1
2	542	02011-04003	C4MIm or BMIM	TfO	[BMIM][TfO]	1-butyl-3-methylimidazolium trifluoromethanesulfonate	C9H15F3N2O3S	298.15	1.438	train	1																1				2	3						3	1										1
58	543	02011-04003	C4MIm or BMIM	TfO	[BMIM][TfO]	1-butyl-3-methylimidazolium trifluoromethanesulfonate	C9H15F3N2O3S	298.15	1.4358	train	1																1				2	3						3	1										1
13	544	02011-04003	C4MIm or BMIM	TfO	[BMIM][TfO]	1-butyl-3-methylimidazolium trifluoromethanesulfonate	C9H15F3N2O3S	298	1.4366	train	1																1				2	3						3	1										1
8	545	02011-04003	C4MIm or BMIM	TfO	[BMIM][TfO]	1-butyl-3-methylimidazolium trifluoromethanesulfonate	C9H15F3N2O3S	283.15	1.437	test	1																1				2	3						3	1										1
8	546	02011-04003	C4MIm or BMIM	TfO	[BMIM][TfO]	1-butyl-3-methylimidazolium trifluoromethanesulfonate	C9H15F3N2O3S	293.15	1.4342	train	1																1				2	3						3	1										1
8	547	02011-04003	C4MIm or BMIM	TfO	[BMIM][TfO]	1-butyl-3-methylimidazolium trifluoromethanesulfonate	C9H15F3N2O3S	303.15	1.4319	train	1																1				2	3						3	1										1
8	548	02011-04003	C4MIm or BMIM	TfO	[BMIM][TfO]	1-butyl-3-methylimidazolium trifluoromethanesulfonate	C9H15F3N2O3S	313.15	1.4292	train	1																1				2	3						3	1										1
8	549	02011-04003	C4MIm or BMIM	TfO	[BMIM][TfO]	1-butyl-3-methylimidazolium trifluoromethanesulfonate	C9H15F3N2O3S	323.15	1.4262	train	1																1				2	3						3	1										1
8	550	02011-04003	C4MIm or BMIM	TfO	[BMIM][TfO]	1-butyl-3-methylimidazolium trifluoromethanesulfonate	C9H15F3N2O3S	333.15	1.4231	test	1																1				2	3						3	1										1
8	551	02011-04003	C4MIm or BMIM	TfO	[BMIM][TfO]	1-butyl-3-methylimidazolium trifluoromethanesulfonate	C9H15F3N2O3S	343.15	1.4209	train	1																1				2	3						3	1										1
8	552	02011-04003	C4MIm or BMIM	TfO	[BMIM][TfO]	1-butyl-3-methylimidazolium trifluoromethanesulfonate	C9H15F3N2O3S	353.15	1.4182	train	1																1				2	3						3	1										1
8	553	02011-04003	C4MIm or BMIM	TfO	[BMIM][TfO]	1-butyl-3-methylimidazolium trifluoromethanesulfonate	C9H15F3N2O3S	363.15	1.4154	train	1																1				2	3						3	1										1
8	554	02011-04003	C4MIm or BMIM	TfO	[BMIM][TfO]	1-butyl-3-methylimidazolium trifluoromethanesulfonate	C9H15F3N2O3S	298.15	1.4322	train	1																1				2	3						3	1										1
9	555	02011-04003	C4MIm or BMIM	TfO	[BMIM][TfO]	1-butyl-3-methylimidazolium trifluoromethanesulfonate	C9H15F3N2O3S	293.15	1.4342	test	1																1				2	3						3	1										1
13	556	02011-04003	C4MIm or BMIM	TfO	[BMIM][TfO]	1-butyl-3-methylimidazolium trifluoromethanesulfonate	C9H15F3N2O3S	298	1.4366	train	1																1				2	3						3	1										1
24	557	02011-04003	C4MIm or BMIM	TfO	[BMIM][TfO]	1-butyl-3-methylimidazolium trifluoromethanesulfonate	C9H15F3N2O3S	298.15	1.43729	train	1																1				2	3						3	1										1
68	558	02011-04003	C4MIm or BMIM	TfO	[BMIM][TfO]	1-butyl-3-methylpyridinium trifluoromethanesulfonate	C11H16F3NO3S	288.15	1.46446	train	1																1				2	3						3	1										1
68	559	02011-04003	C4MIm or BMIM	TfO	[BMIM][TfO]	1-butyl-3-methylpyridinium trifluoromethanesulfonate	C11H16F3NO3S	298.15	1.46155	train	1																1				2	3						3	1										1
68	560	02011-04003	C4MIm or BMIM	TfO	[BMIM][TfO]	1-butyl-3-methylpyridinium trifluoromethanesulfonate	C11H16F3NO3S	308.15	1.45868	test	1																1				2	3						3	1										1
2	561	02011-04005	C4MIm or BMIM	NfO	[BMIM][NfO]	1-butyl-3-methylimidazolium perfluorobutylsulfonate	C12H15F9N2O3S	298.15	1.4052	train	1																1				2	3						3	1									3	1
59	562	02011-04008	C4MIm or BMIM	C8SO4	[BMIM][C8SO4]	1-butyl-3-methylimidazolium octylsulfate	C16H32N2O4S	298.15	1.4699	train	1																1				3	10						3	2
59	563	02011-04008	C4MIm or BMIM	C8SO4	[BMIM][C8SO4]	1-butyl-3-methylimidazolium octylsulfate	C16H32N2O4S	298.15	1.4654	train	1																1				3	10						3	2
56	564	02011-04017	C4MIm or BMIM	MeSO4	[BMIM][MeSO4]	1-butyl-3-methylimidazolium methylsulfate	C9H18N2O4S	298.2	1.4792	train	1																1				3	3						3	2
56	565	02011-04017	C4MIm or BMIM	MeSO4	[BMIM][MeSO4]	1-butyl-3-methylimidazolium methylsulfate	C9H18N2O4S	299.2	1.4789	test	1																1				3	3						3	2
56	566	02011-04017	C4MIm or BMIM	MeSO4	[BMIM][MeSO4]	1-butyl-3-methylimidazolium methylsulfate	C9H18N2O4S	300.2	1.4787	train	1																1				3	3						3	2
56	567	02011-04017	C4MIm or BMIM	MeSO4	[BMIM][MeSO4]	1-butyl-3-methylimidazolium methylsulfate	C9H18N2O4S	301.2	1.4784	train	1																1				3	3						3	2
56	568	02011-04017	C4MIm or BMIM	MeSO4	[BMIM][MeSO4]	1-butyl-3-methylimidazolium methylsulfate	C9H18N2O4S	302.2	1.4782	train	1																1				3	3						3	2
56	569	02011-04017	C4MIm or BMIM	MeSO4	[BMIM][MeSO4]	1-butyl-3-methylimidazolium methylsulfate	C9H18N2O4S	303.2	1.4779	train	1																1				3	3						3	2
56	570	02011-04017	C4MIm or BMIM	MeSO4	[BMIM][MeSO4]	1-butyl-3-methylimidazolium methylsulfate	C9H18N2O4S	304.2	1.4776	test	1																1				3	3						3	2
56	571	02011-04017	C4MIm or BMIM	MeSO4	[BMIM][MeSO4]	1-butyl-3-methylimidazolium methylsulfate	C9H18N2O4S	305.2	1.4774	train	1																1				3	3						3	2
56	572	02011-04017	C4MIm or BMIM	MeSO4	[BMIM][MeSO4]	1-butyl-3-methylimidazolium methylsulfate	C9H18N2O4S	306.2	1.4771	train	1																1				3	3						3	2
56	573	02011-04017	C4MIm or BMIM	MeSO4	[BMIM][MeSO4]	1-butyl-3-methylimidazolium methylsulfate	C9H18N2O4S	307.2	1.4768	train	1																1				3	3						3	2
56	574	02011-04017	C4MIm or BMIM	MeSO4	[BMIM][MeSO4]	1-butyl-3-methylimidazolium methylsulfate	C9H18N2O4S	308.2	1.4766	train	1																1				3	3						3	2
13	575	02011-04017	C4MIm or BMIM	MeSO4	[BMIM][MeSO4]	1-butyl-3-methylimidazolium methylsulfate	C9H18N2O4S	298	1.4777	test	1																1				3	3						3	2
13	576	02011-04017	C4MIm or BMIM	MeSO4	[BMIM][MeSO4]	1-butyl-3-methylimidazolium methylsulfate	C9H18N2O4S	298	1.4777	train	1																1				3	3						3	2
17	577	02011-04017	C4MIm or BMIM	MeSO4	[BMIM][MeSO4]	1-butyl-3-methylimidazolium methylsulfate	C9H18N2O4S	283	1.4831	train	1																1				3	3						3	2
17	578	02011-04017	C4MIm or BMIM	MeSO4	[BMIM][MeSO4]	1-butyl-3-methylimidazolium methylsulfate	C9H18N2O4S	293	1.4777	train	1																1				3	3						3	2
17	579	02011-04017	C4MIm or BMIM	MeSO4	[BMIM][MeSO4]	1-butyl-3-methylimidazolium methylsulfate	C9H18N2O4S	298.1	1.4771	train	1																1				3	3						3	2
17	580	02011-04017	C4MIm or BMIM	MeSO4	[BMIM][MeSO4]	1-butyl-3-methylimidazolium methylsulfate	C9H18N2O4S	303	1.4765	test	1																1				3	3						3	2
17	581	02011-04017	C4MIm or BMIM	MeSO4	[BMIM][MeSO4]	1-butyl-3-methylimidazolium methylsulfate	C9H18N2O4S	313	1.4745	train	1																1				3	3						3	2
17	582	02011-04017	C4MIm or BMIM	MeSO4	[BMIM][MeSO4]	1-butyl-3-methylimidazolium methylsulfate	C9H18N2O4S	323	1.4719	train	1																1				3	3						3	2
17	583	02011-04017	C4MIm or BMIM	MeSO4	[BMIM][MeSO4]	1-butyl-3-methylimidazolium methylsulfate	C9H18N2O4S	333	1.4694	train	1																1				3	3						3	2
17	584	02011-04017	C4MIm or BMIM	MeSO4	[BMIM][MeSO4]	1-butyl-3-methylimidazolium methylsulfate	C9H18N2O4S	343	1.4673	train	1																1				3	3						3	2
17	585	02011-04017	C4MIm or BMIM	MeSO4	[BMIM][MeSO4]	1-butyl-3-methylimidazolium methylsulfate	C9H18N2O4S	353	1.465	test	1																1				3	3						3	2
17	586	02011-04017	C4MIm or BMIM	MeSO4	[BMIM][MeSO4]	1-butyl-3-methylimidazolium methylsulfate	C9H18N2O4S	363	1.4626	train	1																1				3	3						3	2
17	587	02011-04017	C4MIm or BMIM	MeSO4	[BMIM][MeSO4]	1-butyl-3-methylimidazolium methylsulfate	C9H18N2O4S	368.1	1.4615	train	1																1				3	3						3	2
69	588	02011-04017	C4MIm or BMIM	MeSO4	[BMIM][MeSO4]	1-butyl-3-methylimidazolium methylsulfate	C9H18N2O4S	298.15	1.47824	train	1																1				3	3						3	2
69	589	02011-04017	C4MIm or BMIM	MeSO4	[BMIM][MeSO4]	1-butyl-3-methylimidazolium methylsulfate	C9H18N2O4S	303.15	1.47704	train	1																1				3	3						3	2
69	590	02011-04017	C4MIm or BMIM	MeSO4	[BMIM][MeSO4]	1-butyl-3-methylimidazolium methylsulfate	C9H18N2O4S	308.15	1.47577	test	1																1				3	3						3	2
69	591	02011-04017	C4MIm or BMIM	MeSO4	[BMIM][MeSO4]	1-butyl-3-methylimidazolium methylsulfate	C9H18N2O4S	313.15	1.47443	train	1																1				3	3						3	2
70	592	02011-04017	C4MIm or BMIM	MeSO4	[BMIM][MeSO4]	1-butyl-3-methylimidazolium methylsulfate	C9H18N2O4S	298.15	1.47792	train	1																1				3	3						3	2
71	593	02011-04018	C4MIm or BMIM	EtSO4	[BMIM][EtSO4]	1-butyl-3-methylimidazolium ethylsulfate	C10H20N2O4S	298.15	1.47792	train	1																1				3	4						3	2
56	594	02011-05001	C4MIm or BMIM	PF6	[BMIM][PF6]	1-butyl-3-methylimidazolium hexafluorophosphate	C8H15F6N2P	298.2	1.4095	train	1									1											2	3						3
56	595	02011-05001	C4MIm or BMIM	PF6	[BMIM][PF6]	1-butyl-3-methylimidazolium hexafluorophosphate	C8H15F6N2P	299.2	1.4093	test	1										1										2	3						3
56	596	02011-05001	C4MIm or BMIM	PF6	[BMIM][PF6]	1-butyl-3-methylimidazolium hexafluorophosphate	C8H15F6N2P	300.2	1.4091	train	1										1										2	3						3
56	597	02011-05001	C4MIm or BMIM	PF6	[BMIM][PF6]	1-butyl-3-methylimidazolium hexafluorophosphate	C8H15F6N2P	301.2	1.4089	train	1										1										2	3						3
56	598	02011-05001	C4MIm or BMIM	PF6	[BMIM][PF6]	1-butyl-3-methylimidazolium hexafluorophosphate	C8H15F6N2P	302.2	1.4087	train	1										1										2	3						3
56	599	02011-05001	C4MIm or BMIM	PF6	[BMIM][PF6]	1-butyl-3-methylimidazolium hexafluorophosphate	C8H15F6N2P	303.2	1.4085	train	1										1										2	3						3
56	600	02011-05001	C4MIm or BMIM	PF6	[BMIM][PF6]	1-butyl-3-methylimidazolium hexafluorophosphate	C8H15F6N2P	304.2	1.4083	test	1										1										2	3						3
56	601	02011-05001	C4MIm or BMIM	PF6	[BMIM][PF6]	1-butyl-3-methylimidazolium hexafluorophosphate	C8H15F6N2P	305.2	1.4081	train	1										1										2	3						3
56	602	02011-05001	C4MIm or BMIM	PF6	[BMIM][PF6]	1-butyl-3-methylimidazolium hexafluorophosphate	C8H15F6N2P	306.2	1.4079	train	1										1										2	3						3
56	603	02011-05001	C4MIm or BMIM	PF6	[BMIM][PF6]	1-butyl-3-methylimidazolium hexafluorophosphate	C8H15F6N2P	307.2	1.4077	train	1										1										2	3						3
56	604	02011-05001	C4MIm or BMIM	PF6	[BMIM][PF6]	1-butyl-3-methylimidazolium hexafluorophosphate	C8H15F6N2P	308.2	1.4075	train	1										1										2	3						3
54	605	02011-05001	C4MIm or BMIM	PF6	[BMIM][PF6]	1-butyl-3-methylimidazolium hexafluorophosphate	C8H15F6N2P	298.15	1.409	test	1										1										2	3						3
13	606	02011-05001	C4MIm or BMIM	PF6	[BMIM][PF6]	1-butyl-3-methylimidazolium hexafluorophosphate	C8H15F6N2P	298	1.4084	train	1										1										2	3						3
76	607	02011-05001	C4MIm or BMIM	PF6	[BMIM][PF6]	1-butyl-3-methylimidazolium hexafluorophosphate	C8H15F6N2P	298.15	1.4089	train	1										1										2	3						3
72	608	02011-05001	C4MIm or BMIM	PF6	[BMIM][PF6]	1-butyl-3-methylimidazolium hexafluorophosphate	C8H15F6N2P	298.15	1.40937	train	1										1										2	3						3
75	609	02011-05001	C4MIm or BMIM	PF6	[BMIM][PF6]	1-butyl-3-methylimidazolium hexafluorophosphate	C8H15F6N2P	298.15	1.4091	train	1										1										2	3						3
74	610	02011-05001	C4MIm or BMIM	PF6	[BMIM][PF6]	1-butyl-3-methylimidazolium hexafluorophosphate	C8H15F6N2P	298.15	1.4095	test	1										1										2	3						3
73	611	02011-05001	C4MIm or BMIM	PF6	[BMIM][PF6]	1-butyl-3-methylimidazolium hexafluorophosphate	C8H15F6N2P	298.15	1.40937	train	1										1										2	3						3
13	612	02011-05001	C4MIm or BMIM	PF6	[BMIM][PF6]	1-butyl-3-methylimidazolium hexafluorophosphate	C8H15F6N2P	298	1.4084	train	1										1										2	3						3
3	613	02011-05001	C4MIm or BMIM	PF6	[BMIM][PF6]	1-butyl-3-methylimidazolium hexafluorophosphate	C8H15F6N2P	298	1.409	train	1										1										2	3						3
60	614	02011-05001	C4MIm or BMIM	PF6	[BMIM][PF6]	1-butyl-3-methylimidazolium hexafluorophosphate	C8H15F6N2P	298.15	1.4083	train	1										1										2	3						3
40	615	02011-05001	C4MIm or BMIM	PF6	[BMIM][PF6]	1-butyl-3-methylimidazolium hexafluorophosphate	C8H15F6N2P	298.15	1.4106	test	1										1										2	3						3
86	616	02011-05001	C4MIm or BMIM	PF6	[BMIM][PF6]	1-butyl-3-methylimidazolium hexafluorophosphate	C8H15F6N2P	298.15	1.4101	train	1										1										2	3						3
13	617	02011-06003	C4MIm or BMIM	OAc	[BMIM][OAc]	1-butyl-3-methylimidazolium acetate	C10H18N2O2	298	1.4938	train	1																				3	3						3	1								1
13	618	02011-06003	C4MIm or BMIM	OAc	[BMIM][OAc]	1-butyl-3-methylimidazolium acetate	C10H18N2O2	298	1.4938	train	1																				3	3						3	1								1
44	619	02011-06003	C4MIm or BMIM	OAc	[BMIM][OAc]	1-butyl-3-methylimidazolium acetate	C10H18N2O2	283.15	1.49269	train	1																				3	3						3	1								1
44	620	02011-06003	C4MIm or BMIM	OAc	[BMIM][OAc]	1-butyl-3-methylimidazolium acetate	C10H18N2O2	288.15	1.49158	test	1																				3	3						3	1								1
44	621	02011-06003	C4MIm or BMIM	OAc	[BMIM][OAc]	1-butyl-3-methylimidazolium acetate	C10H18N2O2	293.15	1.49021	train	1																				3	3						3	1								1
44	622	02011-06003	C4MIm or BMIM	OAc	[BMIM][OAc]	1-butyl-3-methylimidazolium acetate	C10H18N2O2	298.15	1.4889	train	1																				3	3						3	1								1
44	623	02011-06003	C4MIm or BMIM	OAc	[BMIM][OAc]	1-butyl-3-methylimidazolium acetate	C10H18N2O2	303.15	1.48725	train	1																				3	3						3	1								1
44	624	02011-06003	C4MIm or BMIM	OAc	[BMIM][OAc]	1-butyl-3-methylimidazolium acetate	C10H18N2O2	308.15	1.4858	train	1																				3	3						3	1								1
44	625	02011-06003	C4MIm or BMIM	OAc	[BMIM][OAc]	1-butyl-3-methylimidazolium acetate	C10H18N2O2	313.15	1.48438	test	1																				3	3						3	1								1
44	626	02011-06003	C4MIm or BMIM	OAc	[BMIM][OAc]	1-butyl-3-methylimidazolium acetate	C10H18N2O2	318.15	1.48297	train	1																				3	3						3	1								1
44	627	02011-06003	C4MIm or BMIM	OAc	[BMIM][OAc]	1-butyl-3-methylimidazolium acetate	C10H18N2O2	323.15	1.4806	train	1																				3	3						3	1								1
44	628	02011-06003	C4MIm or BMIM	OAc	[BMIM][OAc]	1-butyl-3-methylimidazolium acetate	C10H18N2O2	328.15	1.47915	train	1																				3	3						3	1								1
44	629	02011-06003	C4MIm or BMIM	OAc	[BMIM][OAc]	1-butyl-3-methylimidazolium acetate	C10H18N2O2	333.15	1.4777	train	1																				3	3						3	1								1
44	630	02011-06003	C4MIm or BMIM	OAc	[BMIM][OAc]	1-butyl-3-methylimidazolium acetate	C10H18N2O2	338.15	1.47624	test	1																				3	3						3	1								1
44	631	02011-06003	C4MIm or BMIM	OAc	[BMIM][OAc]	1-butyl-3-methylimidazolium acetate	C10H18N2O2	343.15	1.47463	train	1																				3	3						3	1								1
44	632	02011-06003	C4MIm or BMIM	OAc	[BMIM][OAc]	1-butyl-3-methylimidazolium acetate	C10H18N2O2	348.15	1.47318	train	1																				3	3						3	1								1
44	633	02011-06003	C4MIm or BMIM	OAc	[BMIM][OAc]	1-butyl-3-methylimidazolium acetate	C10H18N2O2	353.15	1.4718	train	1																				3	3						3	1								1
45	634	02011-06003	C4MIm or BMIM	OAc	[BMIM][OAc]	1-butyl-3-methylimidazolium acetate	C10H18N2O2	283.15	1.49925	train	1																				3	3						3	1								1
45	635	02011-06003	C4MIm or BMIM	OAc	[BMIM][OAc]	1-butyl-3-methylimidazolium acetate	C10H18N2O2	288.15	1.49781	test	1																				3	3						3	1								1
45	636	02011-06003	C4MIm or BMIM	OAc	[BMIM][OAc]	1-butyl-3-methylimidazolium acetate	C10H18N2O2	293.15	1.49634	train	1																				3	3						3	1								1
45	637	02011-06003	C4MIm or BMIM	OAc	[BMIM][OAc]	1-butyl-3-methylimidazolium acetate	C10H18N2O2	298.15	1.49488	train	1																				3	3						3	1								1
45	638	02011-06003	C4MIm or BMIM	OAc	[BMIM][OAc]	1-butyl-3-methylimidazolium acetate	C10H18N2O2	303.15	1.49342	train	1																				3	3						3	1								1
45	639	02011-06003	C4MIm or BMIM	OAc	[BMIM][OAc]	1-butyl-3-methylimidazolium acetate	C10H18N2O2	308.15	1.49197	train	1																				3	3						3	1								1
45	640	02011-06003	C4MIm or BMIM	OAc	[BMIM][OAc]	1-butyl-3-methylimidazolium acetate	C10H18N2O2	313.15	1.49053	test	1																				3	3						3	1								1
45	641	02011-06003	C4MIm or BMIM	OAc	[BMIM][OAc]	1-butyl-3-methylimidazolium acetate	C10H18N2O2	318.15	1.48909	train	1																				3	3						3	1								1
45	642	02011-06003	C4MIm or BMIM	OAc	[BMIM][OAc]	1-butyl-3-methylimidazolium acetate	C10H18N2O2	323.15	1.48765	train	1																				3	3						3	1								1
45	643	02011-06003	C4MIm or BMIM	OAc	[BMIM][OAc]	1-butyl-3-methylimidazolium acetate	C10H18N2O2	328.15	1.48619	train	1																				3	3						3	1								1
45	644	02011-06003	C4MIm or BMIM	OAc	[BMIM][OAc]	1-butyl-3-methylimidazolium acetate	C10H18N2O2	333.15	1.48477	train	1																				3	3						3	1								1
45	645	02011-06003	C4MIm or BMIM	OAc	[BMIM][OAc]	1-butyl-3-methylimidazolium acetate	C10H18N2O2	338.15	1.48332	test	1																				3	3						3	1								1
45	646	02011-06003	C4MIm or BMIM	OAc	[BMIM][OAc]	1-butyl-3-methylimidazolium acetate	C10H18N2O2	343.15	1.48189	train	1																				3	3						3	1								1
78	647	02011-06009	C4MIm or BMIM	Gly	[BMIM][Gly]	1-butyl-3-methylimidazolium glycine	C10H19N3O2	298.15	1.5202	train	1																				2	4						3			1					1	1
78	648	02011-06009	C4MIm or BMIM	Gly	[BMIM][Gly]	1-butyl-3-methylimidazolium glycine	C10H19N3O2	303.15	1.5188	train	1																				2	4						3			1					1	1
78	649	02011-06009	C4MIm or BMIM	Gly	[BMIM][Gly]	1-butyl-3-methylimidazolium glycine	C10H19N3O2	308.15	1.5171	train	1																				2	4						3			1					1	1
78	650	02011-06009	C4MIm or BMIM	Gly	[BMIM][Gly]	1-butyl-3-methylimidazolium glycine	C10H19N3O2	313.15	1.5166	test	1																				2	4						3			1					1	1
79	651	02011-06010	C4MIm or BMIM	Ala	[BMIM][Gly]	1-butyl-3-methylimidazolium glycine	C10H19N3O2	298.15	1.5184	train	1																				3	3	1					3	1	1						1	1
79	652	02011-06010	C4MIm or BMIM	Ala	[BMIM][Gly]	1-butyl-3-methylimidazolium glycine	C10H19N3O2	303.15	1.5168	train	1																				3	3	1					3	1	1						1	1
79	653	02011-06010	C4MIm or BMIM	Ala	[BMIM][Gly]	1-butyl-3-methylimidazolium glycine	C10H19N3O2	308.15	1.5153	train	1																				3	3	1					3	1	1						1	1
79	654	02011-06010	C4MIm or BMIM	Ala	[BMIM][Gly]	1-butyl-3-methylimidazolium glycine	C10H19N3O2	313.15	1.5135	train	1																				3	3	1					3	1	1						1	1
19	655	02011-15005	C4MIm or BMIM	B(CN)4	[BMIM][B(CN)4]	1-butyl-3-methylimidazolium tetracyanoborate	C12H15BN6	283.15	1.4561	test	1															4					2	3						3
19	656	02011-15005	C4MIm or BMIM	B(CN)4	[BMIM][B(CN)4]	1-butyl-3-methylimidazolium tetracyanoborate	C12H15BN6	293.15	1.4533	train	1															4					2	3						3
19	657	02011-15005	C4MIm or BMIM	B(CN)4	[BMIM][B(CN)4]	1-butyl-3-methylimidazolium tetracyanoborate	C12H15BN6	303.15	1.45	train	1															4					2	3						3
19	658	02011-15005	C4MIm or BMIM	B(CN)4	[BMIM][B(CN)4]	1-butyl-3-methylimidazolium tetracyanoborate	C12H15BN6	313.15	1.4473	train	1															4					2	3						3
48	659	02016-02001	C5MIM	BF4	[C5MIM][BF4]	1-methyl-3-pentylimidazolium tetrafluoroborate	C9H17N2BF4	298.15	1.4238	train	1									1											2	4						3
48	660	02016-02001	C5MIM	BF4	[C5MIM][BF4]	1-methyl-3-pentylimidazolium tetrafluoroborate	C9H17N2BF4	303.15	1.4228	test	1									1											2	4						3
48	661	02016-02001	C5MIM	BF4	[C5MIM][BF4]	1-methyl-3-pentylimidazolium tetrafluoroborate	C9H17N2BF4	308.15	1.4216	train	1									1											2	4						3
48	662	02016-02001	C5MIM	BF4	[C5MIM][BF4]	1-methyl-3-pentylimidazolium tetrafluoroborate	C9H17N2BF4	313.15	1.4206	train	1									1											2	4						3
48	663	02016-02001	C5MIM	BF4	[C5MIM][BF4]	1-methyl-3-pentylimidazolium tetrafluoroborate	C9H17N2BF4	318.15	1.4197	train	1									1											2	4						3
48	664	02016-02001	C5MIM	BF4	[C5MIM][BF4]	1-methyl-3-pentylimidazolium tetrafluoroborate	C9H17N2BF4	323.15	1.4185	train	1									1											2	4						3
48	665	02016-02001	C5MIM	BF4	[C5MIM][BF4]	1-methyl-3-pentylimidazolium tetrafluoroborate	C9H17N2BF4	328.15	1.4175	test	1									1											2	4						3
48	666	02016-02001	C5MIM	BF4	[C5MIM][BF4]	1-methyl-3-pentylimidazolium tetrafluoroborate	C9H17N2BF4	333.15	1.4164	train	1									1											2	4						3
48	667	02016-02001	C5MIM	BF4	[C5MIM][BF4]	1-methyl-3-pentylimidazolium tetrafluoroborate	C9H17N2BF4	338.15	1.4153	train	1									1											2	4						3
15	668	02016-03001	C5MIM	TFSI	[C5MIM][TFSI]	1-amyl-3-methylimidazolium bis((trifluoromethyl)sulfonyl)imide	C11H17F6N3O4S2	298.15	1.4289	train	1																2				2	4						3							1				2
80	669	02016-06021	C5MIM	Glu	[C5MIM][Glu]	1-amyl-3-methylimidazolium glutamine	C16H30N4O3	293.15	1.5174	train	1																				2	6						3	1		1					1	2
80	670	02016-06021	C5MIM	Glu	[C5MIM][Glu]	1-amyl-3-methylimidazolium glutamine	C16H30N4O3	298.15	1.5161	test	1																				2	6						3	1		1					1	2
80	671	02016-06021	C5MIM	Glu	[C5MIM][Glu]	1-amyl-3-methylimidazolium glutamine	C16H30N4O3	303.15	1.5148	train	1																				2	6						3	1		1					1	2
80	672	02016-06021	C5MIM	Glu	[C5MIM][Glu]	1-amyl-3-methylimidazolium glutamine	C16H30N4O3	308.15	1.5135	train	1																				2	6						3	1		1					1	2
80	673	02016-06021	C5MIM	Glu	[C5MIM][Glu]	1-amyl-3-methylimidazolium glutamine	C16H30N4O3	313.15	1.5123	train	1																				2	6						3	1		1					1	2
80	674	02016-06021	C5MIM	Glu	[C5MIM][Glu]	1-amyl-3-methylimidazolium glutamine	C16H30N4O3	318.15	1.511	train	1																				2	6						3	1		1					1	2
80	675	02016-06021	C5MIM	Glu	[C5MIM][Glu]	1-amyl-3-methylimidazolium glutamine	C16H30N4O3	323.15	1.5097	test	1																				2	6						3	1		1					1	2
80	676	02016-06021	C5MIM	Glu	[C5MIM][Glu]	1-amyl-3-methylimidazolium glutamine	C16H30N4O3	328.15	1.5083	train	1																				2	6						3	1		1					1	2
2	677	02017-03001	C4C2IM	TFSI	[C4C2IM][TFSI]	1-butyl-3-ethylimidazolium bis((trifluoromethyl)sulfonyl)imide	C11H17F6N3O4S2	298.15	1.4285	train	1																2				2	4						3							1				2
2	678	02017-04003	C4C2IM	TfO	[C4C2IM][TfO]	1-butyl-3-ethylimidazolium trifluoromethanesulfonate	C10H17F3N2O3S	298.15	1.441	train	1																1				2	4						3	1										1
24	679	02017-04003	C4C2IM	TfO	[C4C2IM][TfO]	1-butyl-3-ethylimidazolium trifluoromethanesulfonate	C10H17F3N2O3S	298.15	1.43944	train	1																1				2	4						3	1										1
2	680	02017-04005	C4C2IM	NfO	[C4C2IM][TfO]	1-butyl-3-ethylimidazolium perfluorobutylsulfonate	C13H17F9N2O3S	298.15	1.4025	test	1																1				2	4						3	1									3	1
54	681	02021-01001	C6MIM	Cl	[C6MIM]Cl	1-hexyl-3-methylimidazolium chloride	C10H19ClN2	298.15	1.515	train	1											1									2	5						3
6	682	02021-01001	C6MIM	Cl	[C6MIM]Cl	1-hexyl-3-methylimidazolium chloride	C10H19ClN2	288.15	1.5125	train	1											1									2	5						3
6	683	02021-01001	C6MIM	Cl	[C6MIM]Cl	1-hexyl-3-methylimidazolium chloride	C10H19ClN2	298.15	1.50953	train	1											1									2	5						3
6	684	02021-01001	C6MIM	Cl	[C6MIM]Cl	1-hexyl-3-methylimidazolium chloride	C10H19ClN2	308.15	1.50667	train	1											1									2	5						3
6	685	02021-01001	C6MIM	Cl	[C6MIM]Cl	1-hexyl-3-methylimidazolium chloride	C10H19ClN2	318.15	1.5039	test	1											1									2	5						3
7	686	02021-02001	C6MIM	BF4	[C6MIM][BF4]	1-hexyl-3-methylimidazolium tetrafluoroborate	C10H19BF4N2	293.15	1.4243	train	1									1											2	5						3
10	687	02021-02001	C6MIM	BF4	[C6MIM][BF4]	1-hexyl-3-methylimidazolium tetrafluoroborate	C10H19BF4N2	298.15	1.434	train	1									1											2	5						3
48	688	02021-02001	C6MIM	BF4	[C6MIM][BF4]	1-hexyl-3-methylimidazolium tetrafluoroborate	C10H19BF4N2	298.15	1.427	train	1									1											2	5						3
48	689	02021-02001	C6MIM	BF4	[C6MIM][BF4]	1-hexyl-3-methylimidazolium tetrafluoroborate	C10H19BF4N2	303.15	1.426	train	1									1											2	5						3
48	690	02021-02001	C6MIM	BF4	[C6MIM][BF4]	1-hexyl-3-methylimidazolium tetrafluoroborate	C10H19BF4N2	308.15	1.4249	test	1									1											2	5						3
48	691	02021-02001	C6MIM	BF4	[C6MIM][BF4]	1-hexyl-3-methylimidazolium tetrafluoroborate	C10H19BF4N2	313.15	1.4237	train	1									1											2	5						3
48	692	02021-02001	C6MIM	BF4	[C6MIM][BF4]	1-hexyl-3-methylimidazolium tetrafluoroborate	C10H19BF4N2	318.15	1.4226	train	1									1											2	5						3
48	693	02021-02001	C6MIM	BF4	[C6MIM][BF4]	1-hexyl-3-methylimidazolium tetrafluoroborate	C10H19BF4N2	323.15	1.4215	train	1									1											2	5						3
48	694	02021-02001	C6MIM	BF4	[C6MIM][BF4]	1-hexyl-3-methylimidazolium tetrafluoroborate	C10H19BF4N2	328.15	1.4204	train	1									1											2	5						3
48	695	02021-02001	C6MIM	BF4	[C6MIM][BF4]	1-hexyl-3-methylimidazolium tetrafluoroborate	C10H19BF4N2	333.15	1.4191	test	1									1											2	5						3
48	696	02021-02001	C6MIM	BF4	[C6MIM][BF4]	1-hexyl-3-methylimidazolium tetrafluoroborate	C10H19BF4N2	338.15	1.4179	train	1									1											2	5						3
17	697	02021-02001	C6MIM	BF4	[C6MIM][BF4]	1-hexyl-3-methylimidazolium tetrafluoroborate	C10H19BF4N2	283	1.4265	train	1									1											2	5						3
17	698	02021-02001	C6MIM	BF4	[C6MIM][BF4]	1-hexyl-3-methylimidazolium tetrafluoroborate	C10H19BF4N2	293	1.4241	train	1									1											2	5						3
17	699	02021-02001	C6MIM	BF4	[C6MIM][BF4]	1-hexyl-3-methylimidazolium tetrafluoroborate	C10H19BF4N2	298.1	1.4223	train	1									1											2	5						3
17	700	02021-02001	C6MIM	BF4	[C6MIM][BF4]	1-hexyl-3-methylimidazolium tetrafluoroborate	C10H19BF4N2	303	1.4211	test	1									1											2	5						3
17	701	02021-02001	C6MIM	BF4	[C6MIM][BF4]	1-hexyl-3-methylimidazolium tetrafluoroborate	C10H19BF4N2	313	1.4183	train	1									1											2	5						3
17	702	02021-02001	C6MIM	BF4	[C6MIM][BF4]	1-hexyl-3-methylimidazolium tetrafluoroborate	C10H19BF4N2	323	1.4158	train	1									1											2	5						3
17	703	02021-02001	C6MIM	BF4	[C6MIM][BF4]	1-hexyl-3-methylimidazolium tetrafluoroborate	C10H19BF4N2	333	1.4137	train	1									1											2	5						3
17	704	02021-02001	C6MIM	BF4	[C6MIM][BF4]	1-hexyl-3-methylimidazolium tetrafluoroborate	C10H19BF4N2	343	1.4106	train	1									1											2	5						3
17	705	02021-02001	C6MIM	BF4	[C6MIM][BF4]	1-hexyl-3-methylimidazolium tetrafluoroborate	C10H19BF4N2	353	1.408	test	1									1											2	5						3
17	706	02021-02001	C6MIM	BF4	[C6MIM][BF4]	1-hexyl-3-methylimidazolium tetrafluoroborate	C10H19BF4N2	363	1.4051	train	1									1											2	5						3
17	707	02021-02001	C6MIM	BF4	[C6MIM][BF4]	1-hexyl-3-methylimidazolium tetrafluoroborate	C10H19BF4N2	368.1	1.4038	train	1									1											2	5						3
81	708	02021-02001	C6MIM	BF4	[C6MIM][BF4]	1-hexyl-3-methylimidazolium tetrafluoroborate	C10H19BF4N2	293.15	1.43308	train	1									1											2	5						3
81	709	02021-02001	C6MIM	BF4	[C6MIM][BF4]	1-hexyl-3-methylimidazolium tetrafluoroborate	C10H19BF4N2	298.15	1.43167	train	1									1											2	5						3
81	710	02021-02001	C6MIM	BF4	[C6MIM][BF4]	1-hexyl-3-methylimidazolium tetrafluoroborate	C10H19BF4N2	303.15	1.43029	test	1									1											2	5						3
81	711	02021-02001	C6MIM	BF4	[C6MIM][BF4]	1-hexyl-3-methylimidazolium tetrafluoroborate	C10H19BF4N2	308.15	1.4289	train	1									1											2	5						3
81	712	02021-02001	C6MIM	BF4	[C6MIM][BF4]	1-hexyl-3-methylimidazolium tetrafluoroborate	C10H19BF4N2	313.15	1.42752	train	1									1											2	5						3
81	713	02021-02001	C6MIM	BF4	[C6MIM][BF4]	1-hexyl-3-methylimidazolium tetrafluoroborate	C10H19BF4N2	318.15	1.42612	train	1									1											2	5						3
81	714	02021-02001	C6MIM	BF4	[C6MIM][BF4]	1-hexyl-3-methylimidazolium tetrafluoroborate	C10H19BF4N2	323.15	1.42474	train	1									1											2	5						3
13	715	02021-03001	C6MIM	TFSI	[C6MIM][TFSI]	1-hexyl-3-methylimidazolium bis[(trifluoromethyl)sulfonyl]imide	C12H19F6N3O4S2	298	1.4295	test	1																2				2	5						3							1				2
83	716	02021-03001	C6MIM	TFSI	[C6MIM][TFSI]	1-hexyl-3-methylimidazolium bis[(trifluoromethyl)sulfonyl]imide	C12H19F6N3O4S2	298.15	1.4318	train	1																2				2	5						3							1				2
82	717	02021-03001	C6MIM	TFSI	[C6MIM][TFSI]	1-hexyl-3-methylimidazolium bis[(trifluoromethyl)sulfonyl]imide	C12H19F6N3O4S2	298.15	1.42954	train	1																2				2	5						3							1				2
13	718	02021-03001	C6MIM	TFSI	[C6MIM][TFSI]	1-hexyl-3-methylimidazolium bis[(trifluoromethyl)sulfonyl]imide	C12H19F6N3O4S2	298	1.4295	train	1																2				2	5						3							1				2
10	719	02021-03001	C6MIM	TFSI	[C6MIM][TFSI]	1-hexyl-3-methylimidazolium bis[(trifluoromethyl)sulfonyl]imide	C12H19F6N3O4S2	298.15	1.421	train	1																2				2	5						3							1				2
18	720	02021-03001	C6MIM	TFSI	[C6MIM][TFSI]	1-hexyl-3-methylimidazolium bis[(trifluoromethyl)sulfonyl]imide	C12H19F6N3O4S2	298.15	1.42879	test	1																2				2	5						3							1				2
51	721	02021-03001	C6MIM	TFSI	[C6MIM][TFSI]	1-hexyl-3-methylimidazolium bis[(trifluoromethyl)sulfonyl]imide	C12H19F6N3O4S2	298.15	1.43016	train	1																2				2	5						3							1				2
15	722	02021-03001	C6MIM	TFSI	[C6MIM][TFSI]	1-hexyl-3-methylimidazolium bis[(trifluoromethyl)sulfonyl]imide	C12H19F6N3O4S2	298.15	1.4301	train	1																2				2	5						3							1				2
51	723	02021-03004	C6MIM	dca	[C6MIM][dca]	1-hexyl-3-methylimidazolium dicyanamide	C12H19N5	298.15	1.50419	train	1															2					2	5						3							1
19	724	02021-03028	C6MIM	C(CN)3	[C6MIM][C(CN)3]	1-hexyl-3-methylimidazolium tricyanomethide	C14H19N5	283.15	1.5084	train	1															3					2	5		1				3
19	725	02021-03028	C6MIM	C(CN)3	[C6MIM][C(CN)3]	1-hexyl-3-methylimidazolium tricyanomethide	C14H19N5	293.15	1.5055	test	1															3					2	5		1				3
19	726	02021-03028	C6MIM	C(CN)3	[C6MIM][C(CN)3]	1-hexyl-3-methylimidazolium tricyanomethide	C14H19N5	303.15	1.5026	train	1															3					2	5		1				3
19	727	02021-03028	C6MIM	C(CN)3	[C6MIM][C(CN)3]	1-hexyl-3-methylimidazolium tricyanomethide	C14H19N5	313.15	1.4994	train	1															3					2	5		1				3
84	728	02021-03028	C6MIM	C(CN)3	[C6MIM][C(CN)3]	1-hexyl-3-methylimidazolium tricyanomethide	C14H19N5	283.15	1.5088	train	1															3					2	5		1				3
84	729	02021-03028	C6MIM	C(CN)3	[C6MIM][C(CN)3]	1-hexyl-3-methylimidazolium tricyanomethide	C14H19N5	293.15	1.5057	train	1															3					2	5		1				3
84	730	02021-03028	C6MIM	C(CN)3	[C6MIM][C(CN)3]	1-hexyl-3-methylimidazolium tricyanomethide	C14H19N5	303.15	1.5025	test	1															3					2	5		1				3
84	731	02021-03028	C6MIM	C(CN)3	[C6MIM][C(CN)3]	1-hexyl-3-methylimidazolium tricyanomethide	C14H19N5	313.15	1.4992	train	1															3					2	5		1				3
51	732	02021-04003	C6MIM	TfO	[C6MIM][TfO]	1-hexyl-3-methylimidazolium trifluoromethanesulfonate	C11H19F3N2O3S	303.15	1.43926	train	1																1				2	5						3	1										1
85	733	02021-05001	C6MIM	PF6	[C6MIM][PF6]	1-hexyl-3-methylimidazolium hexafluorophosphate	C10H19F6N2P	298.15	1.41787	train	1										1										2	5						3
13	734	02021-05001	C6MIM	PF6	[C6MIM][PF6]	1-hexyl-3-methylimidazolium hexafluorophosphate	C10H19F6N2P	298	1.4165	train	1										1										2	5						3
13	735	02021-05001	C6MIM	PF6	[C6MIM][PF6]	1-hexyl-3-methylimidazolium hexafluorophosphate	C10H19F6N2P	298	1.4165	test	1										1										2	5						3
86	736	02021-05001	C6MIM	PF6	[C6MIM][PF6]	1-hexyl-3-methylimidazolium hexafluorophosphate	C10H19F6N2P	298.15	1.4179	train	1										1										2	5						3
87	737	02021-05001	C6MIM	PF6	[C6MIM][PF6]	1-hexyl-3-methylimidazolium hexafluorophosphate	C10H19F6N2P	293.15	1.42064	train	1										1										2	5						3
87	738	02021-05001	C6MIM	PF6	[C6MIM][PF6]	1-hexyl-3-methylimidazolium hexafluorophosphate	C10H19F6N2P	298.15	1.41935	train	1										1										2	5						3
87	739	02021-05001	C6MIM	PF6	[C6MIM][PF6]	1-hexyl-3-methylimidazolium hexafluorophosphate	C10H19F6N2P	303.15	1.41806	train	1										1										2	5						3
87	740	02021-05001	C6MIM	PF6	[C6MIM][PF6]	1-hexyl-3-methylimidazolium hexafluorophosphate	C10H19F6N2P	308.15	1.41676	test	1										1										2	5						3
87	741	02021-05001	C6MIM	PF6	[C6MIM][PF6]	1-hexyl-3-methylimidazolium hexafluorophosphate	C10H19F6N2P	313.15	1.41547	train	1										1										2	5						3
87	742	02021-05001	C6MIM	PF6	[C6MIM][PF6]	1-hexyl-3-methylimidazolium hexafluorophosphate	C10H19F6N2P	318.15	1.41417	train	1										1										2	5						3
87	743	02021-05001	C6MIM	PF6	[C6MIM][PF6]	1-hexyl-3-methylimidazolium hexafluorophosphate	C10H19F6N2P	323.15	1.41288	train	1										1										2	5						3
80	744	02021-06021	C6MIM	Glu	[C6MIM][Glu]	1-hexyl-3-methylimidazolium glutamine	C17H32N4O3	293.15	1.5151	train	1																				2	7						3	1		1					1	2
80	745	02021-06021	C6MIM	Glu	[C6MIM][Glu]	1-hexyl-3-methylimidazolium glutamine	C17H32N4O3	298.15	1.514	test	1																				2	7						3	1		1					1	2
80	746	02021-06021	C6MIM	Glu	[C6MIM][Glu]	1-hexyl-3-methylimidazolium glutamine	C17H32N4O3	303.15	1.5126	train	1																				2	7						3	1		1					1	2
80	747	02021-06021	C6MIM	Glu	[C6MIM][Glu]	1-hexyl-3-methylimidazolium glutamine	C17H32N4O3	308.15	1.5113	train	1																				2	7						3	1		1					1	2
80	748	02021-06021	C6MIM	Glu	[C6MIM][Glu]	1-hexyl-3-methylimidazolium glutamine	C17H32N4O3	313.15	1.5101	train	1																				2	7						3	1		1					1	2
80	749	02021-06021	C6MIM	Glu	[C6MIM][Glu]	1-hexyl-3-methylimidazolium glutamine	C17H32N4O3	318.15	1.5086	train	1																				2	7						3	1		1					1	2
80	750	02021-06021	C6MIM	Glu	[C6MIM][Glu]	1-hexyl-3-methylimidazolium glutamine	C17H32N4O3	323.15	1.5077	test	1																				2	7						3	1		1					1	2
80	751	02021-06021	C6MIM	Glu	[C6MIM][Glu]	1-hexyl-3-methylimidazolium glutamine	C17H32N4O3	328.15	1.5065	train	1																				2	7						3	1		1					1	2
15	752	02024-03001	C7MIM	TFSI	[C7MIM][TFSI]	1-heptyl-3-methylimidazolium bis((trifluoromethyl)sulfonyl)imide	C13H21F6N3O4S2	298.15	1.4317	train	1																2				2	6						3							1				2
20	753	02026-03001	C4C4IM	TFSI	[C4C4IM][TFSI]	1,3-dibutylimidazolium bis((trifluoromethyl)sulfonyl)imide	C13H21F6N3O4S2	283.15	1.4376	train	1																2				2	6						3							1				2
20	754	02026-03001	C4C4IM	TFSI	[C4C4IM][TFSI]	1,3-dibutylimidazolium bis((trifluoromethyl)sulfonyl)imide	C13H21F6N3O4S2	293.15	1.4347	train	1																2				2	6						3							1				2
20	755	02026-03001	C4C4IM	TFSI	[C4C4IM][TFSI]	1,3-dibutylimidazolium bis((trifluoromethyl)sulfonyl)imide	C13H21F6N3O4S2	303.15	1.4324	test	1																2				2	6						3							1				2
20	756	02026-03001	C4C4IM	TFSI	[C4C4IM][TFSI]	1,3-dibutylimidazolium bis((trifluoromethyl)sulfonyl)imide	C13H21F6N3O4S2	313.15	1.4298	train	1																2				2	6						3							1				2
88	757	02027-01001	BzMIM	Cl	[BzMIM]Cl	1-benzyl-3-methylimidazolium chloride	C11H13N2Cl	298.15	1.5778	train	1											1									1	1						8						1
88	758	02027-01001	BzMIM	Cl	[BzMIM]Cl	1-benzyl-3-methylimidazolium chloride	C11H13N2Cl	303.15	1.57672	train	1											1									1	1						8						1
88	759	02027-01001	BzMIM	Cl	[BzMIM]Cl	1-benzyl-3-methylimidazolium chloride	C11H13N2Cl	308.15	1.57564	train	1											1									1	1						8						1
88	760	02027-01001	BzMIM	Cl	[BzMIM]Cl	1-benzyl-3-methylimidazolium chloride	C11H13N2Cl	313.15	1.57435	test	1											1									1	1						8						1
88	761	02027-01001	BzMIM	Cl	[BzMIM]Cl	1-benzyl-3-methylimidazolium chloride	C11H13N2Cl	318.15	1.57321	train	1											1									1	1						8						1
88	762	02027-01001	BzMIM	Cl	[BzMIM]Cl	1-benzyl-3-methylimidazolium chloride	C11H13N2Cl	323.15	1.57166	train	1											1									1	1						8						1
88	763	02027-01001	BzMIM	Cl	[BzMIM]Cl	1-benzyl-3-methylimidazolium chloride	C11H13N2Cl	328.15	1.57024	train	1											1									1	1						8						1
88	764	02027-01001	BzMIM	Cl	[BzMIM]Cl	1-benzyl-3-methylimidazolium chloride	C11H13N2Cl	333.15	1.5688	train	1											1									1	1						8						1
88	765	02027-01001	BzMIM	Cl	[BzMIM]Cl	1-benzyl-3-methylimidazolium chloride	C11H13N2Cl	338.15	1.5671	test	1											1									1	1						8						1
88	766	02027-01001	BzMIM	Cl	[BzMIM]Cl	1-benzyl-3-methylimidazolium chloride	C11H13N2Cl	343.15	1.56519	train	1											1									1	1						8						1
88	767	02027-04017	BzMIM	MeSO4	[BzMIM][MeSO4]	1-benzyl-3-methylimidazolium methylsulfate	C12H16N2SO4	298.15	1.53647	train	1																1				2	1						8	2					1
88	768	02027-04017	BzMIM	MeSO4	[BzMIM][MeSO4]	1-benzyl-3-methylimidazolium methylsulfate	C12H16N2SO4	303.15	1.5353	train	1																1				2	1						8	2					1
88	769	02027-04017	BzMIM	MeSO4	[BzMIM][MeSO4]	1-benzyl-3-methylimidazolium methylsulfate	C12H16N2SO4	308.15	1.53408	train	1																1				2	1						8	2					1
88	770	02027-04017	BzMIM	MeSO4	[BzMIM][MeSO4]	1-benzyl-3-methylimidazolium methylsulfate	C12H16N2SO4	313.15	1.53276	test	1																1				2	1						8	2					1
88	771	02027-04017	BzMIM	MeSO4	[BzMIM][MeSO4]	1-benzyl-3-methylimidazolium methylsulfate	C12H16N2SO4	318.15	1.53142	train	1																1				2	1						8	2					1
88	772	02027-04017	BzMIM	MeSO4	[BzMIM][MeSO4]	1-benzyl-3-methylimidazolium methylsulfate	C12H16N2SO4	323.15	1.53018	train	1																1				2	1						8	2					1
88	773	02027-04017	BzMIM	MeSO4	[BzMIM][MeSO4]	1-benzyl-3-methylimidazolium methylsulfate	C12H16N2SO4	328.15	1.52877	train	1																1				2	1						8	2					1
88	774	02027-04017	BzMIM	MeSO4	[BzMIM][MeSO4]	1-benzyl-3-methylimidazolium methylsulfate	C12H16N2SO4	333.15	1.52744	train	1																1				2	1						8	2					1
88	775	02027-04017	BzMIM	MeSO4	[BzMIM][MeSO4]	1-benzyl-3-methylimidazolium methylsulfate	C12H16N2SO4	338.15	1.526	test	1																1				2	1						8	2					1
88	776	02027-04017	BzMIM	MeSO4	[BzMIM][MeSO4]	1-benzyl-3-methylimidazolium methylsulfate	C12H16N2SO4	343.15	1.52462	train	1																1				2	1						8	2					1
54	777	02029-01001	C8MIM	Cl	[C8MIM]Cl	1-octyl-3-methylimidazolium chloride	C12H23ClN2	298.15	1.505	train	1											1									2	7						3
6	778	02029-01001	C8MIM	Cl	[C8MIM]Cl	1-octyl-3-methylimidazolium chloride	C12H23ClN2	288.15	1.49008	train	1											1									2	7						3
6	779	02029-01001	C8MIM	Cl	[C8MIM]Cl	1-octyl-3-methylimidazolium chloride	C12H23ClN2	298.15	1.48709	train	1											1									2	7						3
6	780	02029-01001	C8MIM	Cl	[C8MIM]Cl	1-octyl-3-methylimidazolium chloride	C12H23ClN2	308.15	1.48413	test	1											1									2	7						3
6	781	02029-01001	C8MIM	Cl	[C8MIM]Cl	1-octyl-3-methylimidazolium chloride	C12H23ClN2	318.15	1.48122	train	1											1									2	7						3
59	782	02029-02001	C8MIM	BF4	[C8MIM][BF4]	1-octyl-3-methylimidazolium tetrafluoroborate	C12H23BF4N2	298.15	1.4319	train	1									1											2	7						3
59	783	02029-02001	C8MIM	BF4	[C8MIM][BF4]	1-octyl-3-methylimidazolium tetrafluoroborate	C12H23BF4N2	298.15	1.43342	train	1									1											2	7						3
7	784	02029-02001	C8MIM	BF4	[C8MIM][BF4]	1-octyl-3-methylimidazolium tetrafluoroborate	C12H23BF4N2	293.15	1.4322	train	1									1											2	7						3
32	785	02029-02001	C8MIM	BF4	[C8MIM][BF4]	1-octyl-3-methylimidazolium tetrafluoroborate	C12H23BF4N2	298.15	1.43329	test	1									1											2	7						3
10	786	02029-02001	C8MIM	BF4	[C8MIM][BF4]	1-octyl-3-methylimidazolium tetrafluoroborate	C12H23BF4N2	298.15	1.427	train	1									1											2	7						3
81	787	02029-02001	C8MIM	BF4	[C8MIM][BF4]	1-octyl-3-methylimidazolium tetrafluoroborate	C12H23BF4N2	293.15	1.43389	train	1									1											2	7						3
81	788	02029-02001	C8MIM	BF4	[C8MIM][BF4]	1-octyl-3-methylimidazolium tetrafluoroborate	C12H23BF4N2	298.15	1.43296	train	1									1											2	7						3
81	789	02029-02001	C8MIM	BF4	[C8MIM][BF4]	1-octyl-3-methylimidazolium tetrafluoroborate	C12H23BF4N2	303.15	1.43192	train	1									1											2	7						3
81	790	02029-02001	C8MIM	BF4	[C8MIM][BF4]	1-octyl-3-methylimidazolium tetrafluoroborate	C12H23BF4N2	308.15	1.42939	test	1									1											2	7						3
81	791	02029-02001	C8MIM	BF4	[C8MIM][BF4]	1-octyl-3-methylimidazolium tetrafluoroborate	C12H23BF4N2	313.15	1.42772	train	1									1											2	7						3
81	792	02029-02001	C8MIM	BF4	[C8MIM][BF4]	1-octyl-3-methylimidazolium tetrafluoroborate	C12H23BF4N2	318.15	1.42684	train	1									1											2	7						3
81	793	02029-02001	C8MIM	BF4	[C8MIM][BF4]	1-octyl-3-methylimidazolium tetrafluoroborate	C12H23BF4N2	323.15	1.42696	train	1									1											2	7						3
89	794	02029-03001	C8MIM	TFSI	[C8MIM][TFSI]	1-octyl-3-methylimidazolium bis((trifluoromethyl)sulfonyl)imide	C14H23F6N3O4S2	298.15	1.4327	train	1																2				2	7						3							1				2
90	795	02029-03001	C8MIM	TFSI	[C8MIM][TFSI]	1-octyl-3-methylimidazolium bis((trifluoromethyl)sulfonyl)imide	C14H23F6N3O4S2	298.15	1.43298	test	1																2				2	7						3							1				2
90	796	02029-03001	C8MIM	TFSI	[C8MIM][TFSI]	1-octyl-3-methylimidazolium bis((trifluoromethyl)sulfonyl)imide	C14H23F6N3O4S2	298.15	1.43331	train	1																2				2	7						3							1				2
13	797	02029-03001	C8MIM	TFSI	[C8MIM][TFSI]	1-octyl-3-methylimidazolium bis((trifluoromethyl)sulfonyl)imide	C14H23F6N3O4S2	298	1.4326	train	1																2				2	7						3							1				2
32	798	02029-03001	C8MIM	TFSI	[C8MIM][TFSI]	1-octyl-3-methylimidazolium bis((trifluoromethyl)sulfonyl)imide	C14H23F6N3O4S2	298.15	1.4327	train	1																2				2	7						3							1				2
13	799	02029-03001	C8MIM	TFSI	[C8MIM][TFSI]	1-octyl-3-methylimidazolium bis((trifluoromethyl)sulfonyl)imide	C14H23F6N3O4S2	298	1.4326	train	1																2				2	7						3							1				2
10	800	02029-03001	C8MIM	TFSI	[C8MIM][TFSI]	1-octyl-3-methylimidazolium bis((trifluoromethyl)sulfonyl)imide	C14H23F6N3O4S2	298.15	1.431	test	1																2				2	7						3							1				2
15	801	02029-03001	C8MIM	TFSI	[C8MIM][TFSI]	1-octyl-3-methylimidazolium bis((trifluoromethyl)sulfonyl)imide	C14H23F6N3O4S2	298.15	1.4331	train	1																2				2	7						3							1				2
19	802	02029-03028	C8MIM	C(CN)3	[C8MIM][C(CN)3]	1-octyl-3-methylimidazolium tricyanomethide	C16H23N5	283.15	1.5048	train	1															3					2	7		1				3
19	803	02029-03028	C8MIM	C(CN)3	[C8MIM][C(CN)3]	1-octyl-3-methylimidazolium tricyanomethide	C16H23N5	293.15	1.5021	train	1															3					2	7		1				3
19	804	02029-03028	C8MIM	C(CN)3	[C8MIM][C(CN)3]	1-octyl-3-methylimidazolium tricyanomethide	C16H23N5	303.15	1.4993	train	1															3					2	7		1				3
19	805	02029-03028	C8MIM	C(CN)3	[C8MIM][C(CN)3]	1-octyl-3-methylimidazolium tricyanomethide	C16H23N5	313.15	1.4964	test	1															3					2	7		1				3
54	806	02029-05001	C8MIM	PF6	[C8MIM][PF6]	1-octyl-3-methylimidazoliumhexafluorophosphate	C12H23F6N2P	298.15	1.423	train	1										1										2	7						3
85	807	02029-05001	C8MIM	PF6	[C8MIM][PF6]	1-octyl-3-methylimidazoliumhexafluorophosphate	C12H23F6N2P	298.15	1.42302	train	1										1										2	7						3
13	808	02029-05001	C8MIM	PF6	[C8MIM][PF6]	1-octyl-3-methylimidazoliumhexafluorophosphate	C12H23F6N2P	298	1.4235	train	1										1										2	7						3
13	809	02029-05001	C8MIM	PF6	[C8MIM][PF6]	1-octyl-3-methylimidazoliumhexafluorophosphate	C12H23F6N2P	298	1.4235	train	1										1										2	7						3
86	810	02029-05001	C8MIM	PF6	[C8MIM][PF6]	1-octyl-3-methylimidazoliumhexafluorophosphate	C12H23F6N2P	298.15	1.4217	test	1										1										2	7						3
87	811	02029-05001	C8MIM	PF6	[C8MIM][PF6]	1-octyl-3-methylimidazoliumhexafluorophosphate	C12H23F6N2P	293.15	1.42649	train	1										1										2	7						3
87	812	02029-05001	C8MIM	PF6	[C8MIM][PF6]	1-octyl-3-methylimidazoliumhexafluorophosphate	C12H23F6N2P	298.15	1.42512	train	1										1										2	7						3
87	813	02029-05001	C8MIM	PF6	[C8MIM][PF6]	1-octyl-3-methylimidazoliumhexafluorophosphate	C12H23F6N2P	303.15	1.42376	train	1										1										2	7						3
87	814	02029-05001	C8MIM	PF6	[C8MIM][PF6]	1-octyl-3-methylimidazoliumhexafluorophosphate	C12H23F6N2P	308.15	1.4224	train	1										1										2	7						3
87	815	02029-05001	C8MIM	PF6	[C8MIM][PF6]	1-octyl-3-methylimidazoliumhexafluorophosphate	C12H23F6N2P	313.15	1.42103	test	1										1										2	7						3
87	816	02029-05001	C8MIM	PF6	[C8MIM][PF6]	1-octyl-3-methylimidazoliumhexafluorophosphate	C12H23F6N2P	318.15	1.41967	train	1										1										2	7						3
87	817	02029-05001	C8MIM	PF6	[C8MIM][PF6]	1-octyl-3-methylimidazoliumhexafluorophosphate	C12H23F6N2P	323.15	1.41831	train	1										1										2	7						3
19	818	02029-15005	C8MIM	B(CN)4	[C8MIM][B(CN)4]	1-octyl-3-methylimidazolium tetracyanoborate	C16H23BN6	283.15	1.4603	train	1															4					2	7						3
19	819	02029-15005	C8MIM	B(CN)4	[C8MIM][B(CN)4]	1-octyl-3-methylimidazolium tetracyanoborate	C16H23BN6	293.15	1.457	train	1															4					2	7						3
19	820	02029-15005	C8MIM	B(CN)4	[C8MIM][B(CN)4]	1-octyl-3-methylimidazolium tetracyanoborate	C16H23BN6	303.15	1.4541	test	1															4					2	7						3
19	821	02029-15005	C8MIM	B(CN)4	[C8MIM][B(CN)4]	1-octyl-3-methylimidazolium tetracyanoborate	C16H23BN6	313.15	1.4509	train	1															4					2	7						3
10	822	02039-02001	C10MIM	BF4	[C10MIM][BF4]	1-decyl-3-methylimidazolium tetrafluoroborate	C14H27BF4N2	298.15	1.434	train	1									1											2	7						3
13	823	02039-03001	C10MIM	TFSI	[C10MIM][TFSI]	1-decyl-3-methylimidazolium bis((trifluoromethyl)sulfonyl)imide	C16H27F6N3O4S2	298	1.4356	train	1																2				2	9						3							1				2
13	824	02039-03001	C10MIM	TFSI	[C10MIM][TFSI]	1-decyl-3-methylimidazolium bis((trifluoromethyl)sulfonyl)imide	C16H27F6N3O4S2	298	1.4356	train	1																2				2	9						3							1				2
10	825	02039-03001	C10MIM	TFSI	[C10MIM][TFSI]	1-decyl-3-methylimidazolium bis((trifluoromethyl)sulfonyl)imide	C16H27F6N3O4S2	298.15	1.436	test	1																2				2	9						3							1				2
18	826	02039-03001	C10MIM	TFSI	[C10MIM][TFSI]	1-decyl-3-methylimidazolium bis((trifluoromethyl)sulfonyl)imide	C16H27F6N3O4S2	298.15	1.43584	train	1																2				2	9						3							1				2
19	827	02039-03028	C10MIM	C(CN)3	[C10MIM][C(CN)3]	1-decyl-3-methylimidazolium tricyanomethide	C18H27N5	283.15	1.5008	train	1															3					2	9		1				3
19	828	02039-03028	C10MIM	C(CN)3	[C10MIM][C(CN)3]	1-decyl-3-methylimidazolium tricyanomethide	C18H27N5	293.15	1.4981	train	1															3					2	9		1				3
19	829	02039-03028	C10MIM	C(CN)3	[C10MIM][C(CN)3]	1-decyl-3-methylimidazolium tricyanomethide	C18H27N5	303.15	1.495	train	1															3					2	9		1				3
19	830	02039-03028	C10MIM	C(CN)3	[C10MIM][C(CN)3]	1-decyl-3-methylimidazolium tricyanomethide	C18H27N5	313.15	1.4918	test	1															3					2	9		1				3
19	831	02039-15005	C10MIM	B(CN)4	[DMIM][B(CN)4]	1-decyl-3-methylimidazolium tetracyanoborate	C18H27BN6	283.15	1.4612	train	1															4					2	9						3
19	832	02039-15005	C10MIM	B(CN)4	[DMIM][B(CN)4]	1-decyl-3-methylimidazolium tetracyanoborate	C18H27BN6	293.15	1.4584	train	1															4					2	9						3
19	833	02039-15005	C10MIM	B(CN)4	[DMIM][B(CN)4]	1-decyl-3-methylimidazolium tetracyanoborate	C18H27BN6	303.15	1.4552	train	1															4					2	9						3
19	834	02039-15005	C10MIM	B(CN)4	[DMIM][B(CN)4]	1-decyl-3-methylimidazolium tetracyanoborate	C18H27BN6	313.15	1.4522	train	1															4					2	9						3
13	835	02046-03001	C12MIM	TFSI	[C12MIM][TFSI]	1-dodecyl-3-methylimidazolium bis((trifluoromethyl)sulfonyl)imide	C18H31F6N3O4S2	298	1.4376	test	1																2				2	11						3							1				2
13	836	02046-03001	C12MIM	TFSI	[C12MIM][TFSI]	1-dodecyl-3-methylimidazolium bis((trifluoromethyl)sulfonyl)imide	C18H31F6N3O4S2	298	1.4376	train	1																2				2	11						3							1				2
13	837	02051-03001	C14MIM	TFSI	[C14MIM][TFSI]	1-tetradecyl-3-methylimidazolium bis((trifluoromethyl)sulfonyl)imide	C18H31F6N3O4S2	298	1.4346	train	1																2				2	13						3							1				2
13	838	02051-03001	C14MIM	TFSI	[C14MIM][TFSI]	1-tetradecyl-3-methylimidazolium bis((trifluoromethyl)sulfonyl)imide	C18H31F6N3O4S2	298	1.4346	train	1																2				2	13						3							1				2
91	839	02199-01001	CC=Cmim	Cl	[CC=Cmim]Cl	1-methyl-3-allylimidazolium chloride	C7H11N2Cl	298.15	1.5465	train	1											1									2					2		3
92	840	02277-03001	C18(1[9])MIM	TFSI	[C18(1[9])MIM][TFSI]	1-oleyl-3-methylimidazolium bis(trifluoromethanesulfonyl)imide	C24H41F6N3O4S2	283.2	1.4576	test	1																2				2	15			2			3							1				2
92	841	02277-03001	C18(1[9])MIM	TFSI	[C18(1[9])MIM][TFSI]	1-oleyl-3-methylimidazolium bis(trifluoromethanesulfonyl)imide	C24H41F6N3O4S2	293.2	1.4545	train	1																2				2	15			2			3							1				2
92	842	02277-03001	C18(1[9])MIM	TFSI	[C18(1[9])MIM][TFSI]	1-oleyl-3-methylimidazolium bis(trifluoromethanesulfonyl)imide	C24H41F6N3O4S2	298.2	1.4528	train	1																2				2	15			2			3							1				2
92	843	02277-03001	C18(1[9])MIM	TFSI	[C18(1[9])MIM][TFSI]	1-oleyl-3-methylimidazolium bis(trifluoromethanesulfonyl)imide	C24H41F6N3O4S2	303.2	1.4511	train	1																2				2	15			2			3							1				2
92	844	02277-03001	C18(1[9])MIM	TFSI	[C18(1[9])MIM][TFSI]	1-oleyl-3-methylimidazolium bis(trifluoromethanesulfonyl)imide	C24H41F6N3O4S2	313.2	1.4479	train	1																2				2	15			2			3							1				2
92	845	02277-03001	C18(1[9])MIM	TFSI	[C18(1[9])MIM][TFSI]	1-oleyl-3-methylimidazolium bis(trifluoromethanesulfonyl)imide	C24H41F6N3O4S2	323.2	1.4446	test	1																2				2	15			2			3							1				2
92	846	02277-03001	C18(1[9])MIM	TFSI	[C18(1[9])MIM][TFSI]	1-oleyl-3-methylimidazolium bis(trifluoromethanesulfonyl)imide	C24H41F6N3O4S2	333.2	1.441	train	1																2				2	15			2			3							1				2
92	847	02277-03001	C18(1[9])MIM	TFSI	[C18(1[9])MIM][TFSI]	1-oleyl-3-methylimidazolium bis(trifluoromethanesulfonyl)imide	C24H41F6N3O4S2	343.2	1.4379	train	1																2				2	15			2			3							1				2
93	848	02301-01001	C2CNBIM	Cl	[C2CNBIM]Cl	1-butyl-3-(2-cyanoethyl)-imidazolium chloride	C10H16N3Cl	293.15	1.52575	train	1											1				1					1	5						3
93	849	02301-01001	C2CNBIM	Cl	[C2CNBIM]Cl	1-butyl-3-(2-cyanoethyl)-imidazolium chloride	C10H16N3Cl	298.15	1.5243	train	1											1				1					1	5						3
93	850	02301-01001	C2CNBIM	Cl	[C2CNBIM]Cl	1-butyl-3-(2-cyanoethyl)-imidazolium chloride	C10H16N3Cl	303.15	1.52287	test	1											1				1					1	5						3
93	851	02301-01001	C2CNBIM	Cl	[C2CNBIM]Cl	1-butyl-3-(2-cyanoethyl)-imidazolium chloride	C10H16N3Cl	308.15	1.52139	train	1											1				1					1	5						3
93	852	02301-01001	C2CNBIM	Cl	[C2CNBIM]Cl	1-butyl-3-(2-cyanoethyl)-imidazolium chloride	C10H16N3Cl	313.15	1.51992	train	1											1				1					1	5						3
93	853	02301-01001	C2CNBIM	Cl	[C2CNBIM]Cl	1-butyl-3-(2-cyanoethyl)-imidazolium chloride	C10H16N3Cl	318.15	1.51846	train	1											1				1					1	5						3
93	854	02301-01001	C2CNBIM	Cl	[C2CNBIM]Cl	1-butyl-3-(2-cyanoethyl)-imidazolium chloride	C10H16N3Cl	323.15	1.51707	train	1											1				1					1	5						3
93	855	02301-01001	C2CNBIM	Cl	[C2CNBIM]Cl	1-butyl-3-(2-cyanoethyl)-imidazolium chloride	C10H16N3Cl	328.15	1.5156	test	1											1				1					1	5						3
93	856	02301-01001	C2CNBIM	Cl	[C2CNBIM]Cl	1-butyl-3-(2-cyanoethyl)-imidazolium chloride	C10H16N3Cl	333.15	1.51418	train	1											1				1					1	5						3
94	857	02301-01002	C2CNBIM	Br	[C2CNBIM]Br	1-propyronitrile-3-butylimidazolium bromide	C10H16N3Br	298.15	1.5454	train	1												1			1					1	5						3
94	858	02301-01002	C2CNBIM	Br	[C2CNBIM]Br	1-propyronitrile-3-butylimidazolium bromide	C10H16N3Br	303.15	1.54454	train	1												1			1					1	5						3
94	859	02301-01002	C2CNBIM	Br	[C2CNBIM]Br	1-propyronitrile-3-butylimidazolium bromide	C10H16N3Br	308.15	1.54346	train	1												1			1					1	5						3
94	860	02301-01002	C2CNBIM	Br	[C2CNBIM]Br	1-propyronitrile-3-butylimidazolium bromide	C10H16N3Br	313.15	1.54229	test	1												1			1					1	5						3
94	861	02301-01002	C2CNBIM	Br	[C2CNBIM]Br	1-propyronitrile-3-butylimidazolium bromide	C10H16N3Br	318.15	1.54111	train	1												1			1					1	5						3
94	862	02301-01002	C2CNBIM	Br	[C2CNBIM]Br	1-propyronitrile-3-butylimidazolium bromide	C10H16N3Br	323.15	1.53992	train	1												1			1					1	5						3
94	863	02301-01002	C2CNBIM	Br	[C2CNBIM]Br	1-propyronitrile-3-butylimidazolium bromide	C10H16N3Br	328.15	1.53869	train	1												1			1					1	5						3
94	864	02301-01002	C2CNBIM	Br	[C2CNBIM]Br	1-propyronitrile-3-butylimidazolium bromide	C10H16N3Br	333.15	1.53748	train	1												1			1					1	5						3
95	865	02301-04003	C2CNBIM	TfO	[C2CNBIM][TfO]	1-propyronitrile-3-butylimidazolium trifluoromethanesulfonate	C11H16F3N3O3S	298.15	1.5324	test	1															1	1				1	5						3	1										1
96	866	02301-04003	C2CNBIM	TfO	[C2CNBIM][TfO]	1-propyronitrile-3-butylimidazolium trifluoromethanesulfonate	C11H16F3N3O3S	298.15	1.53523	train	1															1	1				1	5						3	1										1
96	867	02301-04003	C2CNBIM	TfO	[C2CNBIM][TfO]	1-propyronitrile-3-butylimidazolium trifluoromethanesulfonate	C11H16F3N3O3S	303.15	1.53357	train	1															1	1				1	5						3	1										1
96	868	02301-04003	C2CNBIM	TfO	[C2CNBIM][TfO]	1-propyronitrile-3-butylimidazolium trifluoromethanesulfonate	C11H16F3N3O3S	308.15	1.53216	train	1															1	1				1	5						3	1										1
96	869	02301-04003	C2CNBIM	TfO	[C2CNBIM][TfO]	1-propyronitrile-3-butylimidazolium trifluoromethanesulfonate	C11H16F3N3O3S	313.15	1.53072	train	1															1	1				1	5						3	1										1
96	870	02301-04003	C2CNBIM	TfO	[C2CNBIM][TfO]	1-propyronitrile-3-butylimidazolium trifluoromethanesulfonate	C11H16F3N3O3S	318.15	1.52925	test	1															1	1				1	5						3	1										1
96	871	02301-04003	C2CNBIM	TfO	[C2CNBIM][TfO]	1-propyronitrile-3-butylimidazolium trifluoromethanesulfonate	C11H16F3N3O3S	323.15	1.52795	train	1															1	1				1	5						3	1										1
96	872	02301-04003	C2CNBIM	TfO	[C2CNBIM][TfO]	1-propyronitrile-3-butylimidazolium trifluoromethanesulfonate	C11H16F3N3O3S	328.15	1.52652	train	1															1	1				1	5						3	1										1
96	873	02301-04003	C2CNBIM	TfO	[C2CNBIM][TfO]	1-propyronitrile-3-butylimidazolium trifluoromethanesulfonate	C11H16F3N3O3S	333.15	1.52515	train	1															1	1				1	5						3	1										1
95	874	02301-04020	C2CNBIM	DOSS	[C2CNBIM][DOSS]	1-propyronitrile-3-butylimidazolium bis(2-ethylhexyl)sulfosuccinate	C30H53N3O7S	298.15	1.4805	train	1															1	1				5	15	3				2	3	3	2
96	875	02301-04020	C2CNBIM	DOSS	[C2CNBIM][DOSS]	1-propyronitrile-3-butylimidazolium bis(2-ethylhexyl)sulfosuccinate	C30H53N3O7S	298.15	1.48048	test	1															1	1				5	14	3					3	3								2
96	876	02301-04020	C2CNBIM	DOSS	[C2CNBIM][DOSS]	1-propyronitrile-3-butylimidazolium bis(2-ethylhexyl)sulfosuccinate	C30H53N3O7S	303.15	1.47926	train	1															1	1				5	14	3					3	3								2
96	877	02301-04020	C2CNBIM	DOSS	[C2CNBIM][DOSS]	1-propyronitrile-3-butylimidazolium bis(2-ethylhexyl)sulfosuccinate	C30H53N3O7S	308.15	1.47792	train	1															1	1				5	14	3					3	3								2
96	878	02301-04020	C2CNBIM	DOSS	[C2CNBIM][DOSS]	1-propyronitrile-3-butylimidazolium bis(2-ethylhexyl)sulfosuccinate	C30H53N3O7S	313.15	1.47653	train	1															1	1				5	14	3					3	3								2
96	879	02301-04020	C2CNBIM	DOSS	[C2CNBIM][DOSS]	1-propyronitrile-3-butylimidazolium bis(2-ethylhexyl)sulfosuccinate	C30H53N3O7S	318.15	1.47504	train	1															1	1				5	14	3					3	3								2
96	880	02301-04020	C2CNBIM	DOSS	[C2CNBIM][DOSS]	1-propyronitrile-3-butylimidazolium bis(2-ethylhexyl)sulfosuccinate	C30H53N3O7S	323.15	1.47361	test	1															1	1				5	14	3					3	3								2
96	881	02301-04020	C2CNBIM	DOSS	[C2CNBIM][DOSS]	1-propyronitrile-3-butylimidazolium bis(2-ethylhexyl)sulfosuccinate	C30H53N3O7S	328.15	1.47216	train	1															1	1				5	14	3					3	3								2
96	882	02301-04020	C2CNBIM	DOSS	[C2CNBIM][DOSS]	1-propyronitrile-3-butylimidazolium bis(2-ethylhexyl)sulfosuccinate	C30H53N3O7S	333.15	1.4707	train	1															1	1				5	14	3					3	3								2
95	883	02301-04041	C2CNBIM	DDS	[C2CNBIM][DDS]	1-propyronitrile-3-butylimidazolium dodecyl sulfate	C22H41N3O4S	298.15	1.488	train	1															1	1				2	16						3	2
96	884	02301-04041	C2CNBIM	DDS	[C2CNBIM][DDS]	1-propyronitrile-3-butylimidazolium dodecyl sulfate	C22H41N3O4S	298.15	1.48791	train	1															1	1				2	16						3	2
96	885	02301-04041	C2CNBIM	DDS	[C2CNBIM][DDS]	1-propyronitrile-3-butylimidazolium dodecyl sulfate	C22H41N3O4S	303.15	1.48619	test	1															1	1				2	16						3	2
96	886	02301-04041	C2CNBIM	DDS	[C2CNBIM][DDS]	1-propyronitrile-3-butylimidazolium dodecyl sulfate	C22H41N3O4S	308.15	1.48443	train	1															1	1				2	16						3	2
96	887	02301-04041	C2CNBIM	DDS	[C2CNBIM][DDS]	1-propyronitrile-3-butylimidazolium dodecyl sulfate	C22H41N3O4S	313.15	1.48232	train	1															1	1				2	16						3	2
96	888	02301-04041	C2CNBIM	DDS	[C2CNBIM][DDS]	1-propyronitrile-3-butylimidazolium dodecyl sulfate	C22H41N3O4S	318.15	1.48009	train	1															1	1				2	16						3	2
96	889	02301-04041	C2CNBIM	DDS	[C2CNBIM][DDS]	1-propyronitrile-3-butylimidazolium dodecyl sulfate	C22H41N3O4S	323.15	1.47842	train	1															1	1				2	16						3	2
96	890	02301-04041	C2CNBIM	DDS	[C2CNBIM][DDS]	1-propyronitrile-3-butylimidazolium dodecyl sulfate	C22H41N3O4S	328.15	1.47695	test	1															1	1				2	16						3	2
96	891	02301-04041	C2CNBIM	DDS	[C2CNBIM][DDS]	1-propyronitrile-3-butylimidazolium dodecyl sulfate	C22H41N3O4S	333.15	1.47487	train	1															1	1				2	16						3	2
95	892	02301-04044	C2CNBIM	BS	[C2CNBIM][BS]	1-propyronitrile-3-butylimidazolium benzenesulfonate	C16H21N3O3S	298.15	1.5329	train	1															1	1				1	5						8	1					1
96	893	02301-04044	C2CNBIM	BS	[C2CNBIM][BS]	1-propyronitrile-3-butylimidazolium benzenesulfonate	C16H21N3O3S	298.15	1.53378	train	1															1	1				1	5						8	1					1
96	894	02301-04044	C2CNBIM	BS	[C2CNBIM][BS]	1-propyronitrile-3-butylimidazolium benzenesulfonate	C16H21N3O3S	303.15	1.53237	train	1															1	1				1	5						8	1					1
96	895	02301-04044	C2CNBIM	BS	[C2CNBIM][BS]	1-propyronitrile-3-butylimidazolium benzenesulfonate	C16H21N3O3S	308.15	1.53113	test	1															1	1				1	5						8	1					1
96	896	02301-04044	C2CNBIM	BS	[C2CNBIM][BS]	1-propyronitrile-3-butylimidazolium benzenesulfonate	C16H21N3O3S	313.15	1.52975	train	1															1	1				1	5						8	1					1
96	897	02301-04044	C2CNBIM	BS	[C2CNBIM][BS]	1-propyronitrile-3-butylimidazolium benzenesulfonate	C16H21N3O3S	318.15	1.52824	train	1															1	1				1	5						8	1					1
96	898	02301-04044	C2CNBIM	BS	[C2CNBIM][BS]	1-propyronitrile-3-butylimidazolium benzenesulfonate	C16H21N3O3S	323.15	1.52684	train	1															1	1				1	5						8	1					1
96	899	02301-04044	C2CNBIM	BS	[C2CNBIM][BS]	1-propyronitrile-3-butylimidazolium benzenesulfonate	C16H21N3O3S	328.15	1.52544	train	1															1	1				1	5						8	1					1
96	900	02301-04044	C2CNBIM	BS	[C2CNBIM][BS]	1-propyronitrile-3-butylimidazolium benzenesulfonate	C16H21N3O3S	333.15	1.52403	test	1															1	1				1	5						8	1					1
94	901	02302-01002	C2CNHIM	Br	[C2CNHIM]Br	1-propyronitrile-3-hexylimidazolium bromide	C12H20N3Br	298.15	1.52872	train	1												1			1					1	7						3
94	902	02302-01002	C2CNHIM	Br	[C2CNHIM]Br	1-propyronitrile-3-hexylimidazolium bromide	C12H20N3Br	303.15	1.52823	train	1												1			1					1	7						3
94	903	02302-01002	C2CNHIM	Br	[C2CNHIM]Br	1-propyronitrile-3-hexylimidazolium bromide	C12H20N3Br	308.15	1.52719	train	1												1			1					1	7						3
94	904	02302-01002	C2CNHIM	Br	[C2CNHIM]Br	1-propyronitrile-3-hexylimidazolium bromide	C12H20N3Br	313.15	1.526	train	1												1			1					1	7						3
94	905	02302-01002	C2CNHIM	Br	[C2CNHIM]Br	1-propyronitrile-3-hexylimidazolium bromide	C12H20N3Br	318.15	1.52479	test	1												1			1					1	7						3
94	906	02302-01002	C2CNHIM	Br	[C2CNHIM]Br	1-propyronitrile-3-hexylimidazolium bromide	C12H20N3Br	323.15	1.52354	train	1												1			1					1	7						3
94	907	02302-01002	C2CNHIM	Br	[C2CNHIM]Br	1-propyronitrile-3-hexylimidazolium bromide	C12H20N3Br	328.15	1.52229	train	1												1			1					1	7						3
94	908	02302-01002	C2CNHIM	Br	[C2CNHIM]Br	1-propyronitrile-3-hexylimidazolium bromide	C12H20N3Br	333.15	1.52117	train	1												1			1					1	7						3
97	909	02302-04020	C2CNHIM	DOSS	[C2CNHIM][DOSS]	1-propanenitrile-3-hexylimidazolium dioctysulfosuccinate	C32H57N3SO7	298.15	1.4797	train	1															1	1				5	17	3					3	3	2							2
97	910	02302-04020	C2CNHIM	DOSS	[C2CNHIM][DOSS]	1-propanenitrile-3-hexylimidazolium dioctysulfosuccinate	C32H57N3SO7	303.15	1.47841	test	1															1	1				5	17	3					3	3	2							2
97	911	02302-04020	C2CNHIM	DOSS	[C2CNHIM][DOSS]	1-propanenitrile-3-hexylimidazolium dioctysulfosuccinate	C32H57N3SO7	308.15	1.47709	train	1															1	1				5	17	3					3	3	2							2
97	912	02302-04020	C2CNHIM	DOSS	[C2CNHIM][DOSS]	1-propanenitrile-3-hexylimidazolium dioctysulfosuccinate	C32H57N3SO7	313.15	1.4758	train	1															1	1				5	17	3					3	3	2							2
97	913	02302-04020	C2CNHIM	DOSS	[C2CNHIM][DOSS]	1-propanenitrile-3-hexylimidazolium dioctysulfosuccinate	C32H57N3SO7	318.15	1.47447	train	1															1	1				5	17	3					3	3	2							2
97	914	02302-04020	C2CNHIM	DOSS	[C2CNHIM][DOSS]	1-propanenitrile-3-hexylimidazolium dioctysulfosuccinate	C32H57N3SO7	323.15	1.47305	train	1															1	1				5	17	3					3	3	2							2
97	915	02302-04020	C2CNHIM	DOSS	[C2CNHIM][DOSS]	1-propanenitrile-3-hexylimidazolium dioctysulfosuccinate	C32H57N3SO7	328.15	1.47171	test	1															1	1				5	17	3					3	3	2							2
97	916	02302-04020	C2CNHIM	DOSS	[C2CNHIM][DOSS]	1-propanenitrile-3-hexylimidazolium dioctysulfosuccinate	C32H57N3SO7	333.15	1.47029	train	1															1	1				5	17	3					3	3	2							2
97	917	02302-04041	C2CNHIM	DDS	[C2CNHIM][DDS]	1-propanenitrile-3-hexylimidazolium dodecylsulfate	C24H45N3SO4	298.15	1.48409	train	1															1	1				2	18						3	2
97	918	02302-04041	C2CNHIM	DDS	[C2CNHIM][DDS]	1-propanenitrile-3-hexylimidazolium dodecylsulfate	C24H45N3SO4	303.15	1.48269	train	1															1	1				2	18						3	2
97	919	02302-04041	C2CNHIM	DDS	[C2CNHIM][DDS]	1-propanenitrile-3-hexylimidazolium dodecylsulfate	C24H45N3SO4	308.15	1.48125	train	1															1	1				2	18						3	2
97	920	02302-04041	C2CNHIM	DDS	[C2CNHIM][DDS]	1-propanenitrile-3-hexylimidazolium dodecylsulfate	C24H45N3SO4	313.15	1.47991	test	1															1	1				2	18						3	2
97	921	02302-04041	C2CNHIM	DDS	[C2CNHIM][DDS]	1-propanenitrile-3-hexylimidazolium dodecylsulfate	C24H45N3SO4	318.15	1.47863	train	1															1	1				2	18						3	2
97	922	02302-04041	C2CNHIM	DDS	[C2CNHIM][DDS]	1-propanenitrile-3-hexylimidazolium dodecylsulfate	C24H45N3SO4	323.15	1.47702	train	1															1	1				2	18						3	2
97	923	02302-04041	C2CNHIM	DDS	[C2CNHIM][DDS]	1-propanenitrile-3-hexylimidazolium dodecylsulfate	C24H45N3SO4	328.15	1.47566	train	1															1	1				2	18						3	2
97	924	02302-04041	C2CNHIM	DDS	[C2CNHIM][DDS]	1-propanenitrile-3-hexylimidazolium dodecylsulfate	C24H45N3SO4	333.15	1.47422	train	1															1	1				2	18						3	2
97	925	02302-04044	C2CNHIM	BS	[C2CNHIM][BS]	1-propanenitrile-3-hexylimidazolium benzenesulfonate	C18H25N3SO3	298.15	1.527	test	1															1	1				1	7						8	1					1
97	926	02302-04044	C2CNHIM	BS	[C2CNHIM][BS]	1-propanenitrile-3-hexylimidazolium benzenesulfonate	C18H25N3SO3	303.15	1.5261	train	1															1	1				1	7						8	1					1
97	927	02302-04044	C2CNHIM	BS	[C2CNHIM][BS]	1-propanenitrile-3-hexylimidazolium benzenesulfonate	C18H25N3SO3	308.15	1.52499	train	1															1	1				1	7						8	1					1
97	928	02302-04044	C2CNHIM	BS	[C2CNHIM][BS]	1-propanenitrile-3-hexylimidazolium benzenesulfonate	C18H25N3SO3	313.15	1.52382	train	1															1	1				1	7						8	1					1
97	929	02302-04044	C2CNHIM	BS	[C2CNHIM][BS]	1-propanenitrile-3-hexylimidazolium benzenesulfonate	C18H25N3SO3	318.15	1.52266	train	1															1	1				1	7						8	1					1
97	930	02302-04044	C2CNHIM	BS	[C2CNHIM][BS]	1-propanenitrile-3-hexylimidazolium benzenesulfonate	C18H25N3SO3	323.15	1.52145	test	1															1	1				1	7						8	1					1
97	931	02302-04044	C2CNHIM	BS	[C2CNHIM][BS]	1-propanenitrile-3-hexylimidazolium benzenesulfonate	C18H25N3SO3	328.15	1.52025	train	1															1	1				1	7						8	1					1
97	932	02302-04044	C2CNHIM	BS	[C2CNHIM][BS]	1-propanenitrile-3-hexylimidazolium benzenesulfonate	C18H25N3SO3	333.15	1.51899	train	1															1	1				1	7						8	1					1
97	933	02302-04046	C2CNHIM	SBA	[C2CNHIM][SBA]	1-propanenitrile-3-hexylimidazolium sulfobenzoate	C19H25N3SO5	298.15	1.52295	train	1															1	1				1	7						7	1	1	1						1
97	934	02302-04046	C2CNHIM	SBA	[C2CNHIM][SBA]	1-propanenitrile-3-hexylimidazolium sulfobenzoate	C19H25N3SO5	303.15	1.52221	train	1															1	1				1	7						7	1	1	1						1
97	935	02302-04046	C2CNHIM	SBA	[C2CNHIM][SBA]	1-propanenitrile-3-hexylimidazolium sulfobenzoate	C19H25N3SO5	308.15	1.52146	test	1															1	1				1	7						7	1	1	1						1
97	936	02302-04046	C2CNHIM	SBA	[C2CNHIM][SBA]	1-propanenitrile-3-hexylimidazolium sulfobenzoate	C19H25N3SO5	313.15	1.52029	train	1															1	1				1	7						7	1	1	1						1
97	937	02302-04046	C2CNHIM	SBA	[C2CNHIM][SBA]	1-propanenitrile-3-hexylimidazolium sulfobenzoate	C19H25N3SO5	318.15	1.51936	train	1															1	1				1	7						7	1	1	1						1
97	938	02302-04046	C2CNHIM	SBA	[C2CNHIM][SBA]	1-propanenitrile-3-hexylimidazolium sulfobenzoate	C19H25N3SO5	323.15	1.518	train	1															1	1				1	7						7	1	1	1						1
97	939	02302-04046	C2CNHIM	SBA	[C2CNHIM][SBA]	1-propanenitrile-3-hexylimidazolium sulfobenzoate	C19H25N3SO5	328.15	1.51666	train	1															1	1				1	7						7	1	1	1						1
97	940	02302-04046	C2CNHIM	SBA	[C2CNHIM][SBA]	1-propanenitrile-3-hexylimidazolium sulfobenzoate	C19H25N3SO5	333.15	1.51502	test	1															1	1				1	7						7	1	1	1						1
97	941	02302-04047	C2CNHIM	TFMS	[C2CNHIM][TFMS]	1-propanenitrile-3-hexylimidazolium triflouromethanesulfonate	C14H22F3N3SO3	298.15	1.52975	train	1															1	1				1	8						3	1										1
97	942	02302-04047	C2CNHIM	TFMS	[C2CNHIM][TFMS]	1-propanenitrile-3-hexylimidazolium triflouromethanesulfonate	C14H22F3N3SO3	303.15	1.52891	train	1															1	1				1	8						3	1										1
97	943	02302-04047	C2CNHIM	TFMS	[C2CNHIM][TFMS]	1-propanenitrile-3-hexylimidazolium triflouromethanesulfonate	C14H22F3N3SO3	308.15	1.52774	train	1															1	1				1	8						3	1										1
97	944	02302-04047	C2CNHIM	TFMS	[C2CNHIM][TFMS]	1-propanenitrile-3-hexylimidazolium triflouromethanesulfonate	C14H22F3N3SO3	313.15	1.52683	train	1															1	1				1	8						3	1										1
97	945	02302-04047	C2CNHIM	TFMS	[C2CNHIM][TFMS]	1-propanenitrile-3-hexylimidazolium triflouromethanesulfonate	C14H22F3N3SO3	318.15	1.5259	test	1															1	1				1	8						3	1										1
97	946	02302-04047	C2CNHIM	TFMS	[C2CNHIM][TFMS]	1-propanenitrile-3-hexylimidazolium triflouromethanesulfonate	C14H22F3N3SO3	323.15	1.52464	train	1															1	1				1	8						3	1										1
97	947	02302-04047	C2CNHIM	TFMS	[C2CNHIM][TFMS]	1-propanenitrile-3-hexylimidazolium triflouromethanesulfonate	C14H22F3N3SO3	328.15	1.52334	train	1															1	1				1	8						3	1										1
97	948	02302-04047	C2CNHIM	TFMS	[C2CNHIM][TFMS]	1-propanenitrile-3-hexylimidazolium triflouromethanesulfonate	C14H22F3N3SO3	333.15	1.52226	train	1															1	1				1	8						3	1										1
94	949	02303-01002	C2CNOIM	Br	[C2CNOIM]Br	1-propyronitrile-3-octylimidazolium bromide	C14H24N3Br	298.15	1.51473	train	1												1			1					1	9						3
94	950	02303-01002	C2CNOIM	Br	[C2CNOIM]Br	1-propyronitrile-3-octylimidazolium bromide	C14H24N3Br	303.15	1.51362	test	1												1			1					1	9						3
94	951	02303-01002	C2CNOIM	Br	[C2CNOIM]Br	1-propyronitrile-3-octylimidazolium bromide	C14H24N3Br	308.15	1.51266	train	1												1			1					1	9						3
94	952	02303-01002	C2CNOIM	Br	[C2CNOIM]Br	1-propyronitrile-3-octylimidazolium bromide	C14H24N3Br	313.15	1.51149	train	1												1			1					1	9						3
94	953	02303-01002	C2CNOIM	Br	[C2CNOIM]Br	1-propyronitrile-3-octylimidazolium bromide	C14H24N3Br	318.15	1.51024	train	1												1			1					1	9						3
94	954	02303-01002	C2CNOIM	Br	[C2CNOIM]Br	1-propyronitrile-3-octylimidazolium bromide	C14H24N3Br	323.15	1.50891	train	1												1			1					1	9						3
94	955	02303-01002	C2CNOIM	Br	[C2CNOIM]Br	1-propyronitrile-3-octylimidazolium bromide	C14H24N3Br	328.15	1.50757	test	1												1			1					1	9						3
94	956	02303-01002	C2CNOIM	Br	[C2CNOIM]Br	1-propyronitrile-3-octylimidazolium bromide	C14H24N3Br	333.15	1.50604	train	1												1			1					1	9						3
98	957	02303-04003	C2CNOIM	TFMS	[CNC2OIM][TFMS]	1-propyronitrile-3-octylimidazolium triflouromethanesulfonate	C16H26F3N3SO3	298.15	1.52679	train	1															1	1				1	9						3	1										1
98	958	02303-04003	C2CNOIM	TFMS	[CNC2OIM][TFMS]	1-propyronitrile-3-octylimidazolium triflouromethanesulfonate	C16H26F3N3SO3	303.15	1.52584	train	1															1	1				1	9						3	1										1
98	959	02303-04003	C2CNOIM	TFMS	[CNC2OIM][TFMS]	1-propyronitrile-3-octylimidazolium triflouromethanesulfonate	C16H26F3N3SO3	308.15	1.5247	train	1															1	1				1	9						3	1										1
98	960	02303-04003	C2CNOIM	TFMS	[CNC2OIM][TFMS]	1-propyronitrile-3-octylimidazolium triflouromethanesulfonate	C16H26F3N3SO3	313.15	1.52356	test	1															1	1				1	9						3	1										1
98	961	02303-04003	C2CNOIM	TFMS	[CNC2OIM][TFMS]	1-propyronitrile-3-octylimidazolium triflouromethanesulfonate	C16H26F3N3SO3	318.15	1.52248	train	1															1	1				1	9						3	1										1
98	962	02303-04003	C2CNOIM	TFMS	[CNC2OIM][TFMS]	1-propyronitrile-3-octylimidazolium triflouromethanesulfonate	C16H26F3N3SO3	323.15	1.52119	train	1															1	1				1	9						3	1										1
98	963	02303-04003	C2CNOIM	TFMS	[CNC2OIM][TFMS]	1-propyronitrile-3-octylimidazolium triflouromethanesulfonate	C16H26F3N3SO3	328.15	1.51991	train	1															1	1				1	9						3	1										1
98	964	02303-04003	C2CNOIM	TFMS	[CNC2OIM][TFMS]	1-propyronitrile-3-octylimidazolium triflouromethanesulfonate	C16H26F3N3SO3	333.15	1.51873	train	1															1	1				1	9						3	1										1
98	965	02303-04020	C2CNOIM	DOSS	[CNC2OIM][DOSS]	1-propanenitrile-3-octylimidazolium dioctysulfosuccinate	C34H61N3SO7	298.15	1.47692	test	1															1	1				5	18	3					3	3								2
98	966	02303-04020	C2CNOIM	DOSS	[CNC2OIM][DOSS]	1-propanenitrile-3-octylimidazolium dioctysulfosuccinate	C34H61N3SO7	303.15	1.47518	train	1															1	1				5	18	3					3	3								2
98	967	02303-04020	C2CNOIM	DOSS	[CNC2OIM][DOSS]	1-propanenitrile-3-octylimidazolium dioctysulfosuccinate	C34H61N3SO7	308.15	1.47393	train	1															1	1				5	18	3					3	3								2
98	968	02303-04020	C2CNOIM	DOSS	[CNC2OIM][DOSS]	1-propanenitrile-3-octylimidazolium dioctysulfosuccinate	C34H61N3SO7	313.15	1.47253	train	1															1	1				5	18	3					3	3								2
98	969	02303-04020	C2CNOIM	DOSS	[CNC2OIM][DOSS]	1-propanenitrile-3-octylimidazolium dioctysulfosuccinate	C34H61N3SO7	318.15	1.47099	train	1															1	1				5	18	3					3	3								2
98	970	02303-04020	C2CNOIM	DOSS	[CNC2OIM][DOSS]	1-propanenitrile-3-octylimidazolium dioctysulfosuccinate	C34H61N3SO7	323.15	1.46946	test	1															1	1				5	18	3					3	3								2
98	971	02303-04020	C2CNOIM	DOSS	[CNC2OIM][DOSS]	1-propanenitrile-3-octylimidazolium dioctysulfosuccinate	C34H61N3SO7	328.15	1.46798	train	1															1	1				5	18	3					3	3								2
98	972	02303-04020	C2CNOIM	DOSS	[CNC2OIM][DOSS]	1-propanenitrile-3-octylimidazolium dioctysulfosuccinate	C34H61N3SO7	333.15	1.46636	train	1															1	1				5	18	3					3	3								2
98	973	02303-04041	C2CNOIM	DDS	[CNC2OIM][DDS]	1-propanenitrile-3-octylimidazolium dodecylsulfate	C26H49N3SO4	298.15	1.47928	train	1															1	1				2	20						3	2
98	974	02303-04041	C2CNOIM	DDS	[CNC2OIM][DDS]	1-propanenitrile-3-octylimidazolium dodecylsulfate	C26H49N3SO4	303.15	1.47758	train	1															1	1				2	20						3	2
98	975	02303-04041	C2CNOIM	DDS	[CNC2OIM][DDS]	1-propanenitrile-3-octylimidazolium dodecylsulfate	C26H49N3SO4	308.15	1.47597	test	1															1	1				2	20						3	2
98	976	02303-04041	C2CNOIM	DDS	[CNC2OIM][DDS]	1-propanenitrile-3-octylimidazolium dodecylsulfate	C26H49N3SO4	313.15	1.47454	train	1															1	1				2	20						3	2
98	977	02303-04041	C2CNOIM	DDS	[CNC2OIM][DDS]	1-propanenitrile-3-octylimidazolium dodecylsulfate	C26H49N3SO4	318.15	1.47274	train	1															1	1				2	20						3	2
98	978	02303-04041	C2CNOIM	DDS	[CNC2OIM][DDS]	1-propanenitrile-3-octylimidazolium dodecylsulfate	C26H49N3SO4	323.15	1.47098	train	1															1	1				2	20						3	2
98	979	02303-04041	C2CNOIM	DDS	[CNC2OIM][DDS]	1-propanenitrile-3-octylimidazolium dodecylsulfate	C26H49N3SO4	328.15	1.46963	train	1															1	1				2	20						3	2
98	980	02303-04041	C2CNOIM	DDS	[CNC2OIM][DDS]	1-propanenitrile-3-octylimidazolium dodecylsulfate	C26H49N3SO4	333.15	1.46785	test	1															1	1				2	20						3	2
98	981	02303-04044	C2CNOIM	BS	[CNC2OIM][BS]	1-propanenitrile-3-octylimidazolium benzenesulfonate	C20H29N3SO3	298.15	1.52174	train	1															1	1				1	9						8	1					1
98	982	02303-04044	C2CNOIM	BS	[CNC2OIM][BS]	1-propanenitrile-3-octylimidazolium benzenesulfonate	C20H29N3SO3	303.15	1.52084	train	1															1	1				1	9						8	1					1
98	983	02303-04044	C2CNOIM	BS	[CNC2OIM][BS]	1-propanenitrile-3-octylimidazolium benzenesulfonate	C20H29N3SO3	308.15	1.51973	train	1															1	1				1	9						8	1					1
98	984	02303-04044	C2CNOIM	BS	[CNC2OIM][BS]	1-propanenitrile-3-octylimidazolium benzenesulfonate	C20H29N3SO3	313.15	1.51856	train	1															1	1				1	9						8	1					1
98	985	02303-04044	C2CNOIM	BS	[CNC2OIM][BS]	1-propanenitrile-3-octylimidazolium benzenesulfonate	C20H29N3SO3	318.15	1.5174	test	1															1	1				1	9						8	1					1
98	986	02303-04044	C2CNOIM	BS	[CNC2OIM][BS]	1-propanenitrile-3-octylimidazolium benzenesulfonate	C20H29N3SO3	323.15	1.51619	train	1															1	1				1	9						8	1					1
98	987	02303-04044	C2CNOIM	BS	[CNC2OIM][BS]	1-propanenitrile-3-octylimidazolium benzenesulfonate	C20H29N3SO3	328.15	1.51499	train	1															1	1				1	9						8	1					1
98	988	02303-04044	C2CNOIM	BS	[CNC2OIM][BS]	1-propanenitrile-3-octylimidazolium benzenesulfonate	C20H29N3SO3	333.15	1.51373	train	1															1	1				1	9						8	1					1
98	989	02303-04046	C2CNOIM	SBA	[CNC2OIM][SBA]	1-propanenitrile-3-octylimidazolium sulfobenzoate	C21H29N3SO5	298.15	1.51801	train	1															1	1				1	9						7	1		1			1			1
98	990	02303-04046	C2CNOIM	SBA	[CNC2OIM][SBA]	1-propanenitrile-3-octylimidazolium sulfobenzoate	C21H29N3SO5	303.15	1.51692	test	1															1	1				1	9						7	1		1			1			1
98	991	02303-04046	C2CNOIM	SBA	[CNC2OIM][SBA]	1-propanenitrile-3-octylimidazolium sulfobenzoate	C21H29N3SO5	308.15	1.51572	train	1															1	1				1	9						7	1		1			1			1
98	992	02303-04046	C2CNOIM	SBA	[CNC2OIM][SBA]	1-propanenitrile-3-octylimidazolium sulfobenzoate	C21H29N3SO5	313.15	1.5145	train	1															1	1				1	9						7	1		1			1			1
98	993	02303-04046	C2CNOIM	SBA	[CNC2OIM][SBA]	1-propanenitrile-3-octylimidazolium sulfobenzoate	C21H29N3SO5	318.15	1.51321	train	1															1	1				1	9						7	1		1			1			1
98	994	02303-04046	C2CNOIM	SBA	[CNC2OIM][SBA]	1-propanenitrile-3-octylimidazolium sulfobenzoate	C21H29N3SO5	323.15	1.51191	train	1															1	1				1	9						7	1		1			1			1
98	995	02303-04046	C2CNOIM	SBA	[CNC2OIM][SBA]	1-propanenitrile-3-octylimidazolium sulfobenzoate	C21H29N3SO5	328.15	1.51058	test	1															1	1				1	9						7	1		1			1			1
98	996	02303-04046	C2CNOIM	SBA	[CNC2OIM][SBA]	1-propanenitrile-3-octylimidazolium sulfobenzoate	C21H29N3SO5	333.15	1.50912	train	1															1	1				1	9						7	1		1			1			1
94	997	02304-01002	C2CNDIM	Br	[C2CNDIM]Br	1-propyronitrile-3-decylimidazolium bromide	C16H28N3Br	308.15	1.50786	train	1												1			1					1	11						3
94	998	02304-01002	C2CNDIM	Br	[C2CNDIM]Br	1-propyronitrile-3-decylimidazolium bromide	C16H28N3Br	313.15	1.50696	train	1												1			1					1	11						3
94	999	02304-01002	C2CNDIM	Br	[C2CNDIM]Br	1-propyronitrile-3-decylimidazolium bromide	C16H28N3Br	318.15	1.50606	train	1												1			1					1	11						3
94	1000	02304-01002	C2CNDIM	Br	[C2CNDIM]Br	1-propyronitrile-3-decylimidazolium bromide	C16H28N3Br	323.15	1.50502	test	1												1			1					1	11						3
94	1001	02304-01002	C2CNDIM	Br	[C2CNDIM]Br	1-propyronitrile-3-decylimidazolium bromide	C16H28N3Br	328.15	1.50388	train	1												1			1					1	11						3
94	1002	02304-01002	C2CNDIM	Br	[C2CNDIM]Br	1-propyronitrile-3-decylimidazolium bromide	C16H28N3Br	333.15	1.50279	train	1												1			1					1	11						3
95	1003	02304-04020	C2CNDIM	DOSS	[C2CNDIM][DOSS]	1-propyronitrile-3-decylimidazolium bis(2-ethylhexyl)sulfosuccinate	C36H65N3O7S	298.15	1.4761	train	1															1	1				5	21	3				2	3	3	2
96	1004	02304-04020	C2CNDIM	DOSS	[C2CNDIM][DOSS]	1-propyronitrile-3-decylimidazolium bis(2-ethylhexyl)sulfosuccinate	C36H65N3O7S	298.15	1.4761	train	1															1	1				5	20	3					3	3								2
96	1005	02304-04020	C2CNDIM	DOSS	[C2CNDIM][DOSS]	1-propyronitrile-3-decylimidazolium bis(2-ethylhexyl)sulfosuccinate	C36H65N3O7S	303.15	1.47476	test	1															1	1				5	20	3					3	3								2
96	1006	02304-04020	C2CNDIM	DOSS	[C2CNDIM][DOSS]	1-propyronitrile-3-decylimidazolium bis(2-ethylhexyl)sulfosuccinate	C36H65N3O7S	308.15	1.47345	train	1															1	1				5	20	3					3	3								2
96	1007	02304-04020	C2CNDIM	DOSS	[C2CNDIM][DOSS]	1-propyronitrile-3-decylimidazolium bis(2-ethylhexyl)sulfosuccinate	C36H65N3O7S	313.15	1.47203	train	1															1	1				5	20	3					3	3								2
96	1008	02304-04020	C2CNDIM	DOSS	[C2CNDIM][DOSS]	1-propyronitrile-3-decylimidazolium bis(2-ethylhexyl)sulfosuccinate	C36H65N3O7S	318.15	1.47055	train	1															1	1				5	20	3					3	3								2
96	1009	02304-04020	C2CNDIM	DOSS	[C2CNDIM][DOSS]	1-propyronitrile-3-decylimidazolium bis(2-ethylhexyl)sulfosuccinate	C36H65N3O7S	323.15	1.46909	train	1															1	1				5	20	3					3	3								2
96	1010	02304-04020	C2CNDIM	DOSS	[C2CNDIM][DOSS]	1-propyronitrile-3-decylimidazolium bis(2-ethylhexyl)sulfosuccinate	C36H65N3O7S	328.15	1.46761	test	1															1	1				5	20	3					3	3								2
96	1011	02304-04020	C2CNDIM	DOSS	[C2CNDIM][DOSS]	1-propyronitrile-3-decylimidazolium bis(2-ethylhexyl)sulfosuccinate	C36H65N3O7S	333.15	1.46601	train	1															1	1				5	20	3					3	3								2
95	1012	02304-04041	C2CNDIM	DDS	[C2CNDIM][DDS]	1-propyronitrile-3-decylimidazolium dodecyl sulfate	C28H53N3O4S	298.15	1.4745	train	1															1	1				2	18						3	2
96	1013	02304-04041	C2CNDIM	DDS	[C2CNDIM][DDS]	1-propyronitrile-3-decylimidazolium dodecyl sulfate	C28H53N3O4S	298.15	1.47447	train	1															1	1				2	22						3	2
96	1014	02304-04041	C2CNDIM	DDS	[C2CNDIM][DDS]	1-propyronitrile-3-decylimidazolium dodecyl sulfate	C28H53N3O4S	303.15	1.47296	train	1															1	1				2	22						3	2
96	1015	02304-04041	C2CNDIM	DDS	[C2CNDIM][DDS]	1-propyronitrile-3-decylimidazolium dodecyl sulfate	C28H53N3O4S	308.15	1.47142	test	1															1	1				2	22						3	2
96	1016	02304-04041	C2CNDIM	DDS	[C2CNDIM][DDS]	1-propyronitrile-3-decylimidazolium dodecyl sulfate	C28H53N3O4S	313.15	1.46972	train	1															1	1				2	22						3	2
96	1017	02304-04041	C2CNDIM	DDS	[C2CNDIM][DDS]	1-propyronitrile-3-decylimidazolium dodecyl sulfate	C28H53N3O4S	318.15	1.46813	train	1															1	1				2	22						3	2
96	1018	02304-04041	C2CNDIM	DDS	[C2CNDIM][DDS]	1-propyronitrile-3-decylimidazolium dodecyl sulfate	C28H53N3O4S	323.15	1.46678	train	1															1	1				2	22						3	2
96	1019	02304-04041	C2CNDIM	DDS	[C2CNDIM][DDS]	1-propyronitrile-3-decylimidazolium dodecyl sulfate	C28H53N3O4S	328.15	1.46532	train	1															1	1				2	22						3	2
96	1020	02304-04041	C2CNDIM	DDS	[C2CNDIM][DDS]	1-propyronitrile-3-decylimidazolium dodecyl sulfate	C28H53N3O4S	333.15	1.46391	test	1															1	1				2	22						3	2
96	1021	02304-04046	C2CNDIM	SBA	[C2CNDIM][SBA]	1-propanenitrile-3-decylimidazolium sulfobenzoate	C23H33N3SO5	298.15	1.51306	train	1															1	1				1	11						7	1		1			1			1
96	1022	02304-04046	C2CNDIM	SBA	[C2CNDIM][SBA]	1-propanenitrile-3-decylimidazolium sulfobenzoate	C23H33N3SO5	303.15	1.51163	train	1															1	1				1	11						7	1		1			1			1
96	1023	02304-04046	C2CNDIM	SBA	[C2CNDIM][SBA]	1-propanenitrile-3-decylimidazolium sulfobenzoate	C23H33N3SO5	308.15	1.50998	train	1															1	1				1	11						7	1		1			1			1
96	1024	02304-04046	C2CNDIM	SBA	[C2CNDIM][SBA]	1-propanenitrile-3-decylimidazolium sulfobenzoate	C23H33N3SO5	313.15	1.50871	train	1															1	1				1	11						7	1		1			1			1
96	1025	02304-04046	C2CNDIM	SBA	[C2CNDIM][SBA]	1-propanenitrile-3-decylimidazolium sulfobenzoate	C23H33N3SO5	318.15	1.50706	test	1															1	1				1	11						7	1		1			1			1
96	1026	02304-04046	C2CNDIM	SBA	[C2CNDIM][SBA]	1-propanenitrile-3-decylimidazolium sulfobenzoate	C23H33N3SO5	323.15	1.50582	train	1															1	1				1	11						7	1		1			1			1
96	1027	02304-04046	C2CNDIM	SBA	[C2CNDIM][SBA]	1-propanenitrile-3-decylimidazolium sulfobenzoate	C23H33N3SO5	328.15	1.5045	train	1															1	1				1	11						7	1		1			1			1
96	1028	02304-04046	C2CNDIM	SBA	[C2CNDIM][SBA]	1-propanenitrile-3-decylimidazolium sulfobenzoate	C23H33N3SO5	333.15	1.50322	train	1															1	1				1	11						7	1		1			1			1
60	1029	02335-03004	AC4IM	dca or N(CN)2	[AC4IM][dca]	1-allyl-3-butylimidazolium dicyanamide	C12H17N5	298.15	1.514	train	1															2					1	4			1	1		3							1
60	1030	02336-03004	AC6IM	dca or N(CN)2	[AC6IM][dca]	1-allyl-3-hexylimidazolium dicyanamide	C14H21N5	298.15	1.509	test	1															2					1	6			1	1		3							1
60	1031	02337-03004	AC8IM	dca or N(CN)2	[AC8IM][dca]	1-allyl-3-octylimidazolium dicyanamide	C16H25N5	298.15	1.505	train	1															2					1	8			1	1		3							1
60	1032	02338-03004	AC10IM	dca or N(CN)2	[AC10IM][dca]	1-allyl-3-decylimidazolium dicyanamide	C18H29N5	298.15	1.499	train	1															2					1	10			1	1		3							1
60	1033	02339-03004	AC12IM	dca or N(CN)2	[AC12IM][dca]	1-allyl-3-dodecylimidazolium dicyanamide	C20H33N5	298.15	1.495	train	1															2					1	12			1	1		3							1
60	1034	02340-03004	AC14IM	dca or N(CN)2	[AC14IM][dca]	1-allyl-3-tetradecylimidazolium dicyanamide	C22H37N5	298.15	1.493	train	1															2					1	14			1	1		3							1
60	1035	02341-03004	AVIM	dca or N(CN)2	[AVIM][dca]	1-vinyl-3-allylimidazolium dicyanamide	C10H11N5	298.15	1.545	test	1															2					1	3			1	1		3							1
60	1036	02342-03004	VC8IM	dca or N(CN)2	[VC8IM][dca]	1-vinyl-3-octylimidazolium dicyanamide	C15H23N5	298.15	1.506	train	1															2						1			2	2		3							1
60	1037	02343-03004	VC10IM	dca or N(CN)2	VC10IM][dca]	1-vinyl-3-decylimidazolium dicyanamide	C17H27N5	298.15	1.498	train	1															2					1	9			1	1		3							1
99	1038	02360-01001	6OHIM	Cl	[6OHHIM]Cl	1-(6-hydroxyhexyl)imidazolium chloride	C9H17N2OCl	293.15	1.5093	train	1											1										5						4			1
99	1039	02360-01001	6OHIM	Cl	[6OHHIM]Cl	1-(6-hydroxyhexyl)imidazolium chloride	C9H17N2OCl	298.15	1.508	train	1											1										5						4			1
99	1040	02360-01001	6OHIM	Cl	[6OHHIM]Cl	1-(6-hydroxyhexyl)imidazolium chloride	C9H17N2OCl	303.15	1.5067	test	1											1										5						4			1
99	1041	02360-01001	6OHIM	Cl	[6OHHIM]Cl	1-(6-hydroxyhexyl)imidazolium chloride	C9H17N2OCl	308.15	1.5054	train	1											1										5						4			1
99	1042	02360-01001	6OHIM	Cl	[6OHHIM]Cl	1-(6-hydroxyhexyl)imidazolium chloride	C9H17N2OCl	313.15	1.5041	train	1											1										5						4			1
99	1043	02360-01001	6OHIM	Cl	[6OHHIM]Cl	1-(6-hydroxyhexyl)imidazolium chloride	C9H17N2OCl	318.15	1.5028	train	1											1										5						4			1
99	1044	02360-01001	6OHIM	Cl	[6OHHIM]Cl	1-(6-hydroxyhexyl)imidazolium chloride	C9H17N2OCl	323.15	1.5015	train	1											1										5						4			1
99	1045	02360-01001	6OHIM	Cl	[6OHHIM]Cl	1-(6-hydroxyhexyl)imidazolium chloride	C9H17N2OCl	328.15	1.5002	test	1											1										5						4			1
99	1046	02360-01001	6OHIM	Cl	[6OHHIM]Cl	1-(6-hydroxyhexyl)imidazolium chloride	C9H17N2OCl	333.15	1.4989	train	1											1										5						4			1
99	1047	02361-01001	6OHIMC1	Cl	[6OHIMC1]Cl	1-(6-hydroxyhexyl)-3-methylimidazolium chloride	C10H19N2OCl	293.15	1.5106	train	1											1									1	5						3			1
99	1048	02361-01001	6OHIMC1	Cl	[6OHIMC1]Cl	1-(6-hydroxyhexyl)-3-methylimidazolium chloride	C10H19N2OCl	298.15	1.5093	train	1											1									1	5						3			1
99	1049	02361-01001	6OHIMC1	Cl	[6OHIMC1]Cl	1-(6-hydroxyhexyl)-3-methylimidazolium chloride	C10H19N2OCl	303.15	1.508	train	1											1									1	5						3			1
99	1050	02361-01001	6OHIMC1	Cl	[6OHIMC1]Cl	1-(6-hydroxyhexyl)-3-methylimidazolium chloride	C10H19N2OCl	308.15	1.5067	test	1											1									1	5						3			1
99	1051	02361-01001	6OHIMC1	Cl	[6OHIMC1]Cl	1-(6-hydroxyhexyl)-3-methylimidazolium chloride	C10H19N2OCl	313.15	1.5054	train	1											1									1	5						3			1
99	1052	02361-01001	6OHIMC1	Cl	[6OHIMC1]Cl	1-(6-hydroxyhexyl)-3-methylimidazolium chloride	C10H19N2OCl	318.15	1.5041	train	1											1									1	5						3			1
99	1053	02361-01001	6OHIMC1	Cl	[6OHIMC1]Cl	1-(6-hydroxyhexyl)-3-methylimidazolium chloride	C10H19N2OCl	323.15	1.5028	train	1											1									1	5						3			1
99	1054	02361-01001	6OHIMC1	Cl	[6OHIMC1]Cl	1-(6-hydroxyhexyl)-3-methylimidazolium chloride	C10H19N2OCl	328.15	1.5015	train	1											1									1	5						3			1
99	1055	02361-01001	6OHIMC1	Cl	[6OHIMC2]Cl	1-(6-hydroxylhexyl)-3-ethylimidazolium chloride	C11H21N2OCl	333.15	1.5002	test	1											1									1	5						3			1
99	1056	02362-01001	6OHIMC2	Cl	[6OHIMC2]Cl	1-(6-hydroxylhexyl)-3-ethylimidazolium chloride	C11H21N2OCl	293.15	1.5115	train	1											1									1	6						3			1
99	1057	02362-01001	6OHIMC2	Cl	[6OHIMC2]Cl	1-(6-hydroxylhexyl)-3-ethylimidazolium chloride	C11H21N2OCl	298.15	1.5102	train	1											1									1	6						3			1
99	1058	02362-01001	6OHIMC2	Cl	[6OHIMC2]Cl	1-(6-hydroxylhexyl)-3-ethylimidazolium chloride	C11H21N2OCl	303.15	1.5089	train	1											1									1	6						3			1
99	1059	02362-01001	6OHIMC2	Cl	[6OHIMC2]Cl	1-(6-hydroxylhexyl)-3-ethylimidazolium chloride	C11H21N2OCl	308.15	1.5076	train	1											1									1	6						3			1
99	1060	02362-01001	6OHIMC2	Cl	[6OHIMC2]Cl	1-(6-hydroxylhexyl)-3-ethylimidazolium chloride	C11H21N2OCl	313.15	1.5063	test	1											1									1	6						3			1
99	1061	02362-01001	6OHIMC2	Cl	[6OHIMC2]Cl	1-(6-hydroxylhexyl)-3-ethylimidazolium chloride	C11H21N2OCl	318.15	1.505	train	1											1									1	6						3			1
99	1062	02362-01001	6OHIMC2	Cl	[6OHIMC2]Cl	1-(6-hydroxylhexyl)-3-ethylimidazolium chloride	C11H21N2OCl	323.15	1.5037	train	1											1									1	6						3			1
99	1063	02362-01001	6OHIMC2	Cl	[6OHIMC2]Cl	1-(6-hydroxylhexyl)-3-ethylimidazolium chloride	C11H21N2OCl	328.15	1.5024	train	1											1									1	6						3			1
99	1064	02362-01001	6OHIMC2	Cl	[6OHIMC2]Cl	1-(6-hydroxylhexyl)-3-ethylimidazolium chloride	C11H21N2OCl	333.15	1.5011	train	1											1									1	6						3			1
99	1065	02363-01001	6OHIMC4	Cl	[6OHIMC4]Cl	1-(6-hydroxylhexyl)-3-butylimidazolium chloride	C13H25N2OCl	293.15	1.5132	test	1											1									1	8						3			1
99	1066	02363-01001	6OHIMC4	Cl	[6OHIMC4]Cl	1-(6-hydroxylhexyl)-3-butylimidazolium chloride	C13H25N2OCl	298.15	1.5119	train	1											1									1	8						3			1
99	1067	02363-01001	6OHIMC4	Cl	[6OHIMC4]Cl	1-(6-hydroxylhexyl)-3-butylimidazolium chloride	C13H25N2OCl	303.15	1.5106	train	1											1									1	8						3			1
99	1068	02363-01001	6OHIMC4	Cl	[6OHIMC4]Cl	1-(6-hydroxylhexyl)-3-butylimidazolium chloride	C13H25N2OCl	308.15	1.5093	train	1											1									1	8						3			1
99	1069	02363-01001	6OHIMC4	Cl	[6OHIMC4]Cl	1-(6-hydroxylhexyl)-3-butylimidazolium chloride	C13H25N2OCl	313.15	1.508	train	1											1									1	8						3			1
99	1070	02363-01001	6OHIMC4	Cl	[6OHIMC4]Cl	1-(6-hydroxylhexyl)-3-butylimidazolium chloride	C13H25N2OCl	318.15	1.5067	test	1											1									1	8						3			1
99	1071	02363-01001	6OHIMC4	Cl	[6OHIMC4]Cl	1-(6-hydroxylhexyl)-3-butylimidazolium chloride	C13H25N2OCl	323.15	1.5054	train	1											1									1	8						3			1
99	1072	02363-01001	6OHIMC4	Cl	[6OHIMC4]Cl	1-(6-hydroxylhexyl)-3-butylimidazolium chloride	C13H25N2OCl	328.15	1.5041	train	1											1									1	8						3			1
99	1073	02363-01001	6OHIMC4	Cl	[6OHIMC4]Cl	1-(6-hydroxylhexyl)-3-butylimidazolium chloride	C13H25N2OCl	333.15	1.5028	train	1											1									1	8						3			1
92	1074	02388-03001	—	TFSI	—	1-methyl-3-(9z,12z)-9,12-octadecadien-1-yl-1h-imidazolium 1,1,1-trifluoro-n-[(trifluoromethyl)sulfonyl]methanesulfonamide	C24H39F6N3O4S2	283.2	1.471	train	1																2				2	13			4			3							1				2
92	1075	02388-03001	—	TFSI	—	1-methyl-3-(9z,12z)-9,12-octadecadien-1-yl-1h-imidazolium 1,1,1-trifluoro-n-[(trifluoromethyl)sulfonyl]methanesulfonamide	C24H39F6N3O4S2	293.2	1.4676	test	1																2				2	13			4			3							1				2
92	1076	02388-03001	—	TFSI	—	1-methyl-3-(9z,12z)-9,12-octadecadien-1-yl-1h-imidazolium 1,1,1-trifluoro-n-[(trifluoromethyl)sulfonyl]methanesulfonamide	C24H39F6N3O4S2	298.2	1.4661	train	1																2				2	13			4			3							1				2
92	1077	02388-03001	—	TFSI	—	1-methyl-3-(9z,12z)-9,12-octadecadien-1-yl-1h-imidazolium 1,1,1-trifluoro-n-[(trifluoromethyl)sulfonyl]methanesulfonamide	C24H39F6N3O4S2	303.2	1.4645	train	1																2				2	13			4			3							1				2
92	1078	02388-03001	—	TFSI	—	1-methyl-3-(9z,12z)-9,12-octadecadien-1-yl-1h-imidazolium 1,1,1-trifluoro-n-[(trifluoromethyl)sulfonyl]methanesulfonamide	C24H39F6N3O4S2	313.2	1.4612	train	1																2				2	13			4			3							1				2
92	1079	02388-03001	—	TFSI	—	1-methyl-3-(9z,12z)-9,12-octadecadien-1-yl-1h-imidazolium 1,1,1-trifluoro-n-[(trifluoromethyl)sulfonyl]methanesulfonamide	C24H39F6N3O4S2	323.2	1.458	train	1																2				2	13			4			3							1				2
92	1080	02388-03001	—	TFSI	—	1-methyl-3-(9z,12z)-9,12-octadecadien-1-yl-1h-imidazolium 1,1,1-trifluoro-n-[(trifluoromethyl)sulfonyl]methanesulfonamide	C24H39F6N3O4S2	333.2	1.4547	test	1																2				2	13			4			3							1				2
92	1081	02388-03001	—	TFSI	—	1-methyl-3-(9z,12z)-9,12-octadecadien-1-yl-1h-imidazolium 1,1,1-trifluoro-n-[(trifluoromethyl)sulfonyl]methanesulfonamide	C24H39F6N3O4S2	343.2	1.4517	train	1																2				2	13			4			3							1				2
92	1082	02399-03001	—	TFSI	—	1-methyl-3-(9e)-9-octadecen-1-yl-1h-imidazolium 1,1,1-trifluoro-n-[(trifluoromethyl)sulfonyl]methanesulfonamide	C24H41F6N3O4S2	293.2	1.451	train	1																2				2	15			2			3							1				2
92	1083	02399-03001	—	TFSI	—	1-methyl-3-(9e)-9-octadecen-1-yl-1h-imidazolium 1,1,1-trifluoro-n-[(trifluoromethyl)sulfonyl]methanesulfonamide	C24H41F6N3O4S2	298.2	1.4493	train	1																2				2	15			2			3							1				2
92	1084	02399-03001	—	TFSI	—	1-methyl-3-(9e)-9-octadecen-1-yl-1h-imidazolium 1,1,1-trifluoro-n-[(trifluoromethyl)sulfonyl]methanesulfonamide	C24H41F6N3O4S2	303.2	1.4476	train	1																2				2	15			2			3							1				2
92	1085	02399-03001	—	TFSI	—	1-methyl-3-(9e)-9-octadecen-1-yl-1h-imidazolium 1,1,1-trifluoro-n-[(trifluoromethyl)sulfonyl]methanesulfonamide	C24H41F6N3O4S2	313.2	1.4443	test	1																2				2	15			2			3							1				2
92	1086	02399-03001	—	TFSI	—	1-methyl-3-(9e)-9-octadecen-1-yl-1h-imidazolium 1,1,1-trifluoro-n-[(trifluoromethyl)sulfonyl]methanesulfonamide	C24H41F6N3O4S2	323.2	1.441	train	1																2				2	15			2			3							1				2
92	1087	02399-03001	—	TFSI	—	1-methyl-3-(9e)-9-octadecen-1-yl-1h-imidazolium 1,1,1-trifluoro-n-[(trifluoromethyl)sulfonyl]methanesulfonamide	C24H41F6N3O4S2	333.2	1.4374	train	1																2				2	15			2			3							1				2
92	1088	02399-03001	—	TFSI	—	1-methyl-3-(9e)-9-octadecen-1-yl-1h-imidazolium 1,1,1-trifluoro-n-[(trifluoromethyl)sulfonyl]methanesulfonamide	C24H41F6N3O4S2	343.2	1.4343	train	1																2				2	15			2			3							1				2
93	1089	02400-01001	C2CNHEIM	Cl	[C2CNHEIM]Cl	1-(2-cyanoethyl)-3-(2-hydroxyethyl)-imidazolium chloride	C8H12N3OCl	293.15	1.54996	train	1											1				1						4						3			1
93	1090	02400-01001	C2CNHEIM	Cl	[C2CNHEIM]Cl	1-(2-cyanoethyl)-3-(2-hydroxyethyl)-imidazolium chloride	C8H12N3OCl	298.15	1.54847	test	1											1				1						4						3			1
93	1091	02400-01001	C2CNHEIM	Cl	[C2CNHEIM]Cl	1-(2-cyanoethyl)-3-(2-hydroxyethyl)-imidazolium chloride	C8H12N3OCl	303.15	1.54699	train	1											1				1						4						3			1
93	1092	02400-01001	C2CNHEIM	Cl	[C2CNHEIM]Cl	1-(2-cyanoethyl)-3-(2-hydroxyethyl)-imidazolium chloride	C8H12N3OCl	308.15	1.54554	train	1											1				1						4						3			1
93	1093	02400-01001	C2CNHEIM	Cl	[C2CNHEIM]Cl	1-(2-cyanoethyl)-3-(2-hydroxyethyl)-imidazolium chloride	C8H12N3OCl	313.15	1.54412	train	1											1				1						4						3			1
93	1094	02400-01001	C2CNHEIM	Cl	[C2CNHEIM]Cl	1-(2-cyanoethyl)-3-(2-hydroxyethyl)-imidazolium chloride	C8H12N3OCl	318.15	1.54277	train	1											1				1						4						3			1
93	1095	02400-01001	C2CNHEIM	Cl	[C2CNHEIM]Cl	1-(2-cyanoethyl)-3-(2-hydroxyethyl)-imidazolium chloride	C8H12N3OCl	323.15	1.54133	test	1											1				1						4						3			1
93	1096	02400-01001	C2CNHEIM	Cl	[C2CNHEIM]Cl	1-(2-cyanoethyl)-3-(2-hydroxyethyl)-imidazolium chloride	C8H12N3OCl	328.15	1.53985	train	1											1				1						4						3			1
93	1097	02400-01001	C2CNHEIM	Cl	[C2CNHEIM]Cl	1-(2-cyanoethyl)-3-(2-hydroxyethyl)-imidazolium chloride	C8H12N3OCl	333.15	1.53847	train	1											1				1						4						3			1
93	1098	02401-01001	C2CNAIM	Cl	[C2CNAIM]Cl	1-(2-cyanoethyl)-3-(2-propen-1-yl)-imidazolium chloride	C9H12N3Cl	293.15	1.54731	train	1											1				1						3			1	1		3
93	1099	02401-01001	C2CNAIM	Cl	[C2CNAIM]Cl	1-(2-cyanoethyl)-3-(2-propen-1-yl)-imidazolium chloride	C9H12N3Cl	298.15	1.54603	train	1											1				1						3			1	1		3
93	1100	02401-01001	C2CNAIM	Cl	[C2CNAIM]Cl	1-(2-cyanoethyl)-3-(2-propen-1-yl)-imidazolium chloride	C9H12N3Cl	303.15	1.54478	test	1											1				1						3			1	1		3
93	1101	02401-01001	C2CNAIM	Cl	[C2CNAIM]Cl	1-(2-cyanoethyl)-3-(2-propen-1-yl)-imidazolium chloride	C9H12N3Cl	308.15	1.54339	train	1											1				1						3			1	1		3
93	1102	02401-01001	C2CNAIM	Cl	[C2CNAIM]Cl	1-(2-cyanoethyl)-3-(2-propen-1-yl)-imidazolium chloride	C9H12N3Cl	313.15	1.54208	train	1											1				1						3			1	1		3
93	1103	02401-01001	C2CNAIM	Cl	[C2CNAIM]Cl	1-(2-cyanoethyl)-3-(2-propen-1-yl)-imidazolium chloride	C9H12N3Cl	318.15	1.54072	train	1											1				1						3			1	1		3
93	1104	02401-01001	C2CNAIM	Cl	[C2CNAIM]Cl	1-(2-cyanoethyl)-3-(2-propen-1-yl)-imidazolium chloride	C9H12N3Cl	323.15	1.53945	train	1											1				1						3			1	1		3
93	1105	02401-01001	C2CNAIM	Cl	[C2CNAIM]Cl	1-(2-cyanoethyl)-3-(2-propen-1-yl)-imidazolium chloride	C9H12N3Cl	328.15	1.53813	test	1											1				1						3			1	1		3
93	1106	02401-01001	C2CNAIM	Cl	[C2CNAIM]Cl	1-(2-cyanoethyl)-3-(2-propen-1-yl)-imidazolium chloride	C9H12N3Cl	333.15	1.53682	train	1											1				1						3			1	1		3
2	1107	03004-03001	E1M3,5IM	TFSI	[E1M3,5IM][TFSI]	1-ethyl-3,5-dimethylimidazolium bis((trifluoromethyl)sulfonyl)imide	C9H13F6N3O4S2	298.15	1.4275	train	1																2				3	1						2							1				2
2	1108	03005-03001	EDMIM	TFSI	[EDMIM][TFSI]	1-ethyl-2,3-dimethylimidazolium bis(trifluoromethylsulfonyl)imide	C9H13F6N3O4S2	298.15	1.4305	train	1																2				3	1						2							1				2
15	1109	03005-03001	EDMIM	TFSI	[EDMIM][TFSI]	1-ethyl-2,3-dimethylimidazolium bis(trifluoromethylsulfonyl)imide	C9H13F6N3O4S2	298.15	1.4296	train	1																2				3	1						2							1				2
15	1110	03009-03001	C3DMIM	TFSI	[C3DMIM]TFSI]	1-propyl-2,3-dimethylimidazolium bis((trifluoromethyl)sulfonyl)imide	C10H15F6N3O4S2	298.15	1.432	test	1																2				3	2						2							1				2
3	1111	03010-03001	BDMIM	TFSI	[BDMIM][TFSI]	1-butyl-2,3-dimethylimidazolium bis((trifluoromethyl)sulfonyl)imide	C11H17F6N3O4S2	298	1.4305	train	1																2				3	3						2							2				2
15	1112	03010-03001	BDMIM	TFSI	[BDMIM][TFSI]	1-butyl-2,3-dimethylimidazolium bis((trifluoromethyl)sulfonyl)imide	C11H17F6N3O4S2	298.15	1.4334	train	1																2				3	3						2							1				2
15	1113	03012-03001	C8DMIM	TFSI	[C8DMIM][TFSI]	1-octyl-2,3-dimethylimidazolium bis((trifluoromethyl)sulfonyl)imide	C15H25F6N3O4S2	298.15	1.438	train	1																2				3	7						2							1				2
15	1114	03058-03001	C6DMIM	TFSI	[C6DMIM][TFSI]	1-hexyl-2,3-dimethylimidazolium bis((trifluoromethyl)sulfonyl)imide	C13H21F6N3O4S2	298.15	1.436	train	1																2				3	5						2							1				2
2	1115	03088-03001	EEMIM	TFSI	[EEMIM][TFSI]	1,3-diethyl-2-methylimidazolium bis(trifluoromethylsulfonyl)amide	C10H15F6N3O4S2	298.15	1.43	test	1																2				3	2						2							1				2
15	1116	03112-03001	C5DMIM	TFSI	[C5DMIM][TFSI]	1-pentyl-2,3dimethylimidazolium bis(trifluoromethylsulfonyl)amide	C12H19F6N3O4S2	298.15	1.435	train	1																2				3	4						2							1				2
15	1117	03113-03001	C7DMIM	TFSI	[C7DMIM][TFSI]	1-heptyl-2,3dimethylimidazolium bis(trifluoromethylsulfonyl)amide	C14H23F6N3O4S2	298.15	1.437	train	1																2				3	6						2							1				2
113	1118	11038-03001	C2mpy	TFSI	[C2mpy][TFSI]	1-ethyl-3-methylpyridinium bis((trifluoromethyl)sulfonyl)amide	C10H12F6N2O4S2	298.15	1.44376	train		1															2				2	1						8							1				2
11	1119	08003-03001	P13	TFSI	[P13][TFSI]	1-methyl-1-propylpyrrolidinium bis[(trifluoromethyl)sulfonyl]amide	C10H18F6N2O4S2	283	1.42474	train		1															2				2	2						8							1				2
11	1120	08003-03001	P13	TFSI	[P13][TFSI]	1-methyl-1-propylpyrrolidinium bis[(trifluoromethyl)sulfonyl]amide	C10H18F6N2O4S2	288	1.42336	test		1															2				2	2						8							1				2
11	1121	08003-03001	P13	TFSI	[P13][TFSI]	1-methyl-1-propylpyrrolidinium bis[(trifluoromethyl)sulfonyl]amide	C10H18F6N2O4S2	293	1.42201	train		1															2				2	2						8							1				2
11	1122	08003-03001	P13	TFSI	[P13][TFSI]	1-methyl-1-propylpyrrolidinium bis[(trifluoromethyl)sulfonyl]amide	C10H18F6N2O4S2	298	1.42064	train		1															2				2	2						8							1				2
11	1123	08003-03001	P13	TFSI	[P13][TFSI]	1-methyl-1-propylpyrrolidinium bis[(trifluoromethyl)sulfonyl]amide	C10H18F6N2O4S2	303	1.41925	train		1															2				2	2						8							1				2
11	1124	08003-03001	P13	TFSI	[P13][TFSI]	1-methyl-1-propylpyrrolidinium bis[(trifluoromethyl)sulfonyl]amide	C10H18F6N2O4S2	308	1.41792	train		1															2				2	2						8							1				2
11	1125	08003-03001	P13	TFSI	[P13][TFSI]	1-methyl-1-propylpyrrolidinium bis[(trifluoromethyl)sulfonyl]amide	C10H18F6N2O4S2	313	1.41656	test		1															2				2	2						8							1				2
11	1126	08003-03001	P13	TFSI	[P13][TFSI]	1-methyl-1-propylpyrrolidinium bis[(trifluoromethyl)sulfonyl]amide	C10H18F6N2O4S2	318	1.41519	train		1															2				2	2						8							1				2
11	1127	08003-03001	P13	TFSI	[P13][TFSI]	1-methyl-1-propylpyrrolidinium bis[(trifluoromethyl)sulfonyl]amide	C10H18F6N2O4S2	323	1.41389	train		1															2				2	2						8							1				2
11	1128	08003-03001	P13	TFSI	[P13][TFSI]	1-methyl-1-propylpyrrolidinium bis[(trifluoromethyl)sulfonyl]amide	C10H18F6N2O4S2	328	1.41252	train		1															2				2	2						8							1				2
11	1129	08003-03001	P13	TFSI	[P13][TFSI]	1-methyl-1-propylpyrrolidinium bis[(trifluoromethyl)sulfonyl]amide	C10H18F6N2O4S2	333	1.41119	train		1															2				2	2						8							1				2
11	1130	08003-03001	P13	TFSI	[P13][TFSI]	1-methyl-1-propylpyrrolidinium bis[(trifluoromethyl)sulfonyl]amide	C10H18F6N2O4S2	338	1.40986	test		1															2				2	2						8							1				2
11	1131	08003-03001	P13	TFSI	[P13][TFSI]	1-methyl-1-propylpyrrolidinium bis[(trifluoromethyl)sulfonyl]amide	C10H18F6N2O4S2	343	1.40853	train		1															2				2	2						8							1				2
11	1132	08003-03001	P13	TFSI	[P13][TFSI]	1-methyl-1-propylpyrrolidinium bis[(trifluoromethyl)sulfonyl]amide	C10H18F6N2O4S2	348	1.40718	train		1															2				2	2						8							1				2
11	1133	08003-03001	P13	TFSI	[P13][TFSI]	1-methyl-1-propylpyrrolidinium bis[(trifluoromethyl)sulfonyl]amide	C10H18F6N2O4S2	353	1.40589	train		1															2				2	2						8							1				2
100	1134	08003-03001	P13	TFSI	[P13][TFSI]	1-methyl-1-propylpyrrolidinium bis[(trifluoromethyl)sulfonyl]amide	C10H18F6N2O4S2	298.15	1.42064	train		1															2				2	2						8							1				2
100	1135	08003-03001	P13	TFSI	[P13][TFSI]	1-methyl-1-propylpyrrolidinium bis[(trifluoromethyl)sulfonyl]amide	C10H18F6N2O4S2	293.15	1.42208	test		1															2				2	2						8							1				2
100	1136	08003-03001	P13	TFSI	[P13][TFSI]	1-methyl-1-propylpyrrolidinium bis[(trifluoromethyl)sulfonyl]amide	C10H18F6N2O4S2	298.15	1.42069	train		1															2				2	2						8							1				2
100	1137	08003-03001	P13	TFSI	[P13][TFSI]	1-methyl-1-propylpyrrolidinium bis[(trifluoromethyl)sulfonyl]amide	C10H18F6N2O4S2	303.15	1.41928	train		1															2				2	2						8							1				2
100	1138	08003-03001	P13	TFSI	[P13][TFSI]	1-methyl-1-propylpyrrolidinium bis[(trifluoromethyl)sulfonyl]amide	C10H18F6N2O4S2	308.15	1.41787	train		1															2				2	2						8							1				2
100	1139	08003-03001	P13	TFSI	[P13][TFSI]	1-methyl-1-propylpyrrolidinium bis[(trifluoromethyl)sulfonyl]amide	C10H18F6N2O4S2	313.15	1.41644	train		1															2				2	2						8							1				2
100	1140	08003-03001	P13	TFSI	[P13][TFSI]	1-methyl-1-propylpyrrolidinium bis[(trifluoromethyl)sulfonyl]amide	C10H18F6N2O4S2	318.15	1.415	test		1															2				2	2						8							1				2
100	1141	08003-03001	P13	TFSI	[P13][TFSI]	1-methyl-1-propylpyrrolidinium bis[(trifluoromethyl)sulfonyl]amide	C10H18F6N2O4S2	323.15	1.41354	train		1															2				2	2						8							1				2
100	1142	08003-03001	P13	TFSI	[P13][TFSI]	1-methyl-1-propylpyrrolidinium bis[(trifluoromethyl)sulfonyl]amide	C10H18F6N2O4S2	328.15	1.41212	train		1															2				2	2						8							1				2
100	1143	08003-03001	P13	TFSI	[P13][TFSI]	1-methyl-1-propylpyrrolidinium bis[(trifluoromethyl)sulfonyl]amide	C10H18F6N2O4S2	333.15	1.41073	train		1															2				2	2						8							1				2
100	1144	08003-03001	P13	TFSI	[P13][TFSI]	1-methyl-1-propylpyrrolidinium bis[(trifluoromethyl)sulfonyl]amide	C10H18F6N2O4S2	338.15	1.40932	train		1															2				2	2						8							1				2
100	1145	08003-03001	P13	TFSI	[P13][TFSI]	1-methyl-1-propylpyrrolidinium bis[(trifluoromethyl)sulfonyl]amide	C10H18F6N2O4S2	343.15	1.40796	test		1															2				2	2						8							1				2
8	1146	08004-03001	P14	TFSI	[P14][TFSI]	1-methyl-1-butyl-pyrrolidinium bis((trifluoromethyl)sulfonyl)imide	C11H20F6N2O4S2	283.15	1.4241	train		1															2				2	3						8							1				2
8	1147	08004-03001	P14	TFSI	[P14][TFSI]	1-methyl-1-butyl-pyrrolidinium bis((trifluoromethyl)sulfonyl)imide	C11H20F6N2O4S2	293.15	1.4216	train		1															2				2	3						8							1				2
8	1148	08004-03001	P14	TFSI	[P14][TFSI]	1-methyl-1-butyl-pyrrolidinium bis((trifluoromethyl)sulfonyl)imide	C11H20F6N2O4S2	303.15	1.4191	train		1															2				2	3						8							1				2
8	1149	08004-03001	P14	TFSI	[P14][TFSI]	1-methyl-1-butyl-pyrrolidinium bis((trifluoromethyl)sulfonyl)imide	C11H20F6N2O4S2	313.15	1.416	train		1															2				2	3						8							1				2
8	1150	08004-03001	P14	TFSI	[P14][TFSI]	1-methyl-1-butyl-pyrrolidinium bis((trifluoromethyl)sulfonyl)imide	C11H20F6N2O4S2	323.15	1.4134	test		1															2				2	3						8							1				2
8	1151	08004-03001	P14	TFSI	[P14][TFSI]	1-methyl-1-butyl-pyrrolidinium bis((trifluoromethyl)sulfonyl)imide	C11H20F6N2O4S2	333.15	1.4108	train		1															2				2	3						8							1				2
8	1152	08004-03001	P14	TFSI	[P14][TFSI]	1-methyl-1-butyl-pyrrolidinium bis((trifluoromethyl)sulfonyl)imide	C11H20F6N2O4S2	343.15	1.4085	train		1															2				2	3						8							1				2
8	1153	08004-03001	P14	TFSI	[P14][TFSI]	1-methyl-1-butyl-pyrrolidinium bis((trifluoromethyl)sulfonyl)imide	C11H20F6N2O4S2	353.15	1.4058	train		1															2				2	3						8							1				2
8	1154	08004-03001	P14	TFSI	[P14][TFSI]	1-methyl-1-butyl-pyrrolidinium bis((trifluoromethyl)sulfonyl)imide	C11H20F6N2O4S2	363.15	1.4035	train		1															2				2	3						8							1				2
8	1155	08004-03001	P14	TFSI	[P14][TFSI]	1-methyl-1-butyl-pyrrolidinium bis((trifluoromethyl)sulfonyl)imide	C11H20F6N2O4S2	298.15	1.4195	test		1															2				2	3						8							1				2
9	1156	08004-03001	P14	TFSI	[P14][TFSI]	1-methyl-1-butyl-pyrrolidinium bis((trifluoromethyl)sulfonyl)imide	C11H20F6N2O4S2	293.15	1.4216	train		1															2				2	3						8							1				2
68	1157	08004-03004	P14	dca	[P14][dca]	1-butyl-1-methylpyrrolidinium dicyanamide	C9H20NC2N3	288.15	1.49968	train		1														2					2	3						8							1
68	1158	08004-03004	P14	dca	[P14][dca]	1-butyl-1-methylpyrrolidinium dicyanamide	C9H20NC2N3	298.15	1.49681	train		1														2					2	3						8							1
68	1159	08004-03004	P14	dca	[P14][dca]	1-butyl-1-methylpyrrolidinium dicyanamide	C9H20NC2N3	308.15	1.49392	train		1														2					2	3						8							1
101	1160	08004-03004	P14	dca	[P14][dca]	1-butyl-1-methylpyrrolidinium dicyanamide	C11H20N4	293.15	1.49833	test		1														2					2	3						8							1
101	1161	08004-03004	P14	dca	[P14][dca]	1-butyl-1-methylpyrrolidinium dicyanamide	C11H20N4	298.15	1.49681	train		1														2					2	3						8							1
101	1162	08004-03004	P14	dca	[P14][dca]	1-butyl-1-methylpyrrolidinium dicyanamide	C11H20N4	298.15	1.49687	train		1														2					2	3						8							1
101	1163	08004-03004	P14	dca	[P14][dca]	1-butyl-1-methylpyrrolidinium dicyanamide	C11H20N4	298.15	1.49687	train		1														2					2	3						8							1
101	1164	08004-03004	P14	dca	[P14][dca]	1-butyl-1-methylpyrrolidinium dicyanamide	C11H20N4	303.15	1.49539	train		1														2					2	3						8							1
101	1165	08004-03004	P14	dca	[P14][dca]	1-butyl-1-methylpyrrolidinium dicyanamide	C11H20N4	308.15	1.49394	test		1														2					2	3						8							1
101	1166	08004-03004	P14	dca	[P14][dca]	1-butyl-1-methylpyrrolidinium dicyanamide	C11H20N4	313.15	1.49248	train		1														2					2	3						8							1
101	1167	08004-03004	P14	dca	[P14][dca]	1-butyl-1-methylpyrrolidinium dicyanamide	C11H20N4	318.15	1.49099	train		1														2					2	3						8							1
101	1168	08004-03004	P14	dca	[P14][dca]	1-butyl-1-methylpyrrolidinium dicyanamide	C11H20N4	323.15	1.4895	train		1														2					2	3						8							1
101	1169	08004-03004	P14	dca	[P14][dca]	1-butyl-1-methylpyrrolidinium dicyanamide	C11H20N4	328.15	1.48801	train		1														2					2	3						8							1
101	1170	08004-03004	P14	dca	[P14][dca]	1-butyl-1-methylpyrrolidinium dicyanamide	C11H20N4	328.15	1.48821	test		1														2					2	3						8							1
101	1171	08004-03004	P14	dca	[P14][dca]	1-butyl-1-methylpyrrolidinium dicyanamide	C11H20N4	333.15	1.48652	train		1														2					2	3						8							1
101	1172	08004-03004	P14	dca	[P14][dca]	1-butyl-1-methylpyrrolidinium dicyanamide	C11H20N4	338.15	1.48505	train		1														2					2	3						8							1
101	1173	08004-03004	P14	dca	[P14][dca]	1-butyl-1-methylpyrrolidinium dicyanamide	C11H20N4	343.15	1.4836	train		1														2					2	3						8							1
24	1174	08004-04003	P14	TfO	[P14][TfO]	1-methyl-1-butyl-pyrrolidinium trifluoromethanesulfonate	C9H20NF3O3S	298.15	1.43267	train		1															1				2	3						8	1										1
102	1175	08017-03009	Pyrr	NO3	[Pyrr][NO3]	pyrrolidinium nitrate	C4H10N2O3	298.15	1.3955	test		1													1													10
103	1176	08017-06039	Pyrr	C7H15COO	[Pyrr][C7H15COO]	pyrrolidinium octanoate	C12H25NO2	298.15	1.4581	train		1																			1	6						10	1								1
104	1177	08025-03001	C1C1CNPyr	TFSI	[C1C1CNPyr][TFSI]	1-cyanomethyl-1-meth-ylpyrrolidinium bistriflimide	C9H13N3F6O4	293.15	1.4305	train		1														1	2				1	1						4							1				2
104	1178	08026-03001	C1C2CNPyr	TFSI	[C1C2CNPyr][TFSI]	1-cyanoethyl-1-meth-ylpyrrolidinium bistriflimide,	C10H15N3F6O4	293.15	1.435	train		1														1	2				1	2						4							1				2
104	1179	08027-03001	C1C3CNPyr	TFSI	[C1C3CNPyr][TFSI]	1-cyanopropyl-1-meth-ylpyrrolidinium bistriflimide,	C11H17N3F6O4	293.15	1.436	train		1														1	2				1	3						4							1				2
104	1180	08028-03001	C1C5CNPyr	TFSI	[C1C5CNPyr][TFSI]	1-cyanoamyl-1-meth-ylpyrrolidinium bistriflimide,	C13H21N3F6O4	293.15	1.4365	test		1														1	2				1	5						4							1				2
105	1181	09001-03001	PP13	TFSI	[PP13][TFSI]	n-methyl-n-propylpiperidinium bis((trifluoromethyl)sulfonyl)imide	C11H20F6N2O4S2	288.15	1.43004	train				1													2				2	2						8							1				2
105	1182	09001-03001	PP13	TFSI	[PP13][TFSI]	n-methyl-n-propylpiperidinium bis((trifluoromethyl)sulfonyl)imide	C11H20F6N2O4S2	293.15	1.42865	train				1													2				2	2						8							1				2
105	1183	09001-03001	PP13	TFSI	[PP13][TFSI]	n-methyl-n-propylpiperidinium bis((trifluoromethyl)sulfonyl)imide	C11H20F6N2O4S2	298.15	1.42739	train				1													2				2	2						8							1				2
105	1184	09001-03001	PP13	TFSI	[PP13][TFSI]	n-methyl-n-propylpiperidinium bis((trifluoromethyl)sulfonyl)imide	C11H20F6N2O4S2	303.15	1.42586	train				1													2				2	2						8							1				2
105	1185	09001-03001	PP13	TFSI	[PP13][TFSI]	n-methyl-n-propylpiperidinium bis((trifluoromethyl)sulfonyl)imide	C11H20F6N2O4S2	308.15	1.42444	test				1													2				2	2						8							1				2
105	1186	09001-03001	PP13	TFSI	[PP13][TFSI]	n-methyl-n-propylpiperidinium bis((trifluoromethyl)sulfonyl)imide	C11H20F6N2O4S2	313.15	1.42304	train				1													2				2	2						8							1				2
105	1187	09001-03001	PP13	TFSI	[PP13][TFSI]	n-methyl-n-propylpiperidinium bis((trifluoromethyl)sulfonyl)imide	C11H20F6N2O4S2	318.15	1.42165	train				1													2				2	2						8							1				2
105	1188	09001-03001	PP13	TFSI	[PP13][TFSI]	n-methyl-n-propylpiperidinium bis((trifluoromethyl)sulfonyl)imide	C11H20F6N2O4S2	323.15	1.42027	train				1													2				2	2						8							1				2
105	1189	09001-03001	PP13	TFSI	[PP13][TFSI]	n-methyl-n-propylpiperidinium bis((trifluoromethyl)sulfonyl)imide	C11H20F6N2O4S2	328.15	1.41894	train				1													2				2	2						8							1				2
105	1190	09001-03001	PP13	TFSI	[PP13][TFSI]	n-methyl-n-propylpiperidinium bis((trifluoromethyl)sulfonyl)imide	C11H20F6N2O4S2	333.15	1.41758	test				1													2				2	2						8							1				2
105	1191	09001-03001	PP13	TFSI	[PP13][TFSI]	n-methyl-n-propylpiperidinium bis((trifluoromethyl)sulfonyl)imide	C11H20F6N2O4S2	338.15	1.41624	train				1													2				2	2						8							1				2
105	1192	09001-03001	PP13	TFSI	[PP13][TFSI]	n-methyl-n-propylpiperidinium bis((trifluoromethyl)sulfonyl)imide	C11H20F6N2O4S2	343.15	1.41489	train				1													2				2	2						8							1				2
105	1193	09001-03001	PP13	TFSI	[PP13][TFSI]	n-methyl-n-propylpiperidinium bis((trifluoromethyl)sulfonyl)imide	C11H20F6N2O4S2	348.15	1.41357	train				1													2				2	2						8							1				2
105	1194	09001-03001	PP13	TFSI	[PP13][TFSI]	n-methyl-n-propylpiperidinium bis((trifluoromethyl)sulfonyl)imide	C11H20F6N2O4S2	353.15	1.41227	train				1													2				2	2						8							1				2
105	1195	09009-03001	PP14	TFSI	[PP14][TFSI]	n-methyl-n-butyl-piperidinium bis((trifluoromethyl)sulfonyl)imide	C12H22F6N2O4S2	288.15	1.43208	test				1													2				2	3						8							1				2
105	1196	09009-03001	PP14	TFSI	[PP14][TFSI]	n-methyl-n-butyl-piperidinium bis((trifluoromethyl)sulfonyl)imide	C12H22F6N2O4S2	293.15	1.43066	train				1													2				2	3						8							1				2
105	1197	09009-03001	PP14	TFSI	[PP14][TFSI]	n-methyl-n-butyl-piperidinium bis((trifluoromethyl)sulfonyl)imide	C12H22F6N2O4S2	298.15	1.42928	train				1													2				2	3						8							1				2
105	1198	09009-03001	PP14	TFSI	[PP14][TFSI]	n-methyl-n-butyl-piperidinium bis((trifluoromethyl)sulfonyl)imide	C12H22F6N2O4S2	303.15	1.42784	train				1													2				2	3						8							1				2
105	1199	09009-03001	PP14	TFSI	[PP14][TFSI]	n-methyl-n-butyl-piperidinium bis((trifluoromethyl)sulfonyl)imide	C12H22F6N2O4S2	308.15	1.42646	train				1													2				2	3						8							1				2
105	1200	09009-03001	PP14	TFSI	[PP14][TFSI]	n-methyl-n-butyl-piperidinium bis((trifluoromethyl)sulfonyl)imide	C12H22F6N2O4S2	313.15	1.42505	test				1													2				2	3						8							1				2
105	1201	09009-03001	PP14	TFSI	[PP14][TFSI]	n-methyl-n-butyl-piperidinium bis((trifluoromethyl)sulfonyl)imide	C12H22F6N2O4S2	318.15	1.42366	train				1													2				2	3						8							1				2
105	1202	09009-03001	PP14	TFSI	[PP14][TFSI]	n-methyl-n-butyl-piperidinium bis((trifluoromethyl)sulfonyl)imide	C12H22F6N2O4S2	323.15	1.42231	train				1													2				2	3						8							1				2
105	1203	09009-03001	PP14	TFSI	[PP14][TFSI]	n-methyl-n-butyl-piperidinium bis((trifluoromethyl)sulfonyl)imide	C12H22F6N2O4S2	328.15	1.42091	train				1													2				2	3						8							1				2
105	1204	09009-03001	PP14	TFSI	[PP14][TFSI]	n-methyl-n-butyl-piperidinium bis((trifluoromethyl)sulfonyl)imide	C12H22F6N2O4S2	333.15	1.41957	train				1													2				2	3						8							1				2
105	1205	09009-03001	PP14	TFSI	[PP14][TFSI]	n-methyl-n-butyl-piperidinium bis((trifluoromethyl)sulfonyl)imide	C12H22F6N2O4S2	338.15	1.41825	test				1													2				2	3						8							1				2
105	1206	09009-03001	PP14	TFSI	[PP14][TFSI]	n-methyl-n-butyl-piperidinium bis((trifluoromethyl)sulfonyl)imide	C12H22F6N2O4S2	343.15	1.4169	train				1													2				2	3						8							1				2
105	1207	09009-03001	PP14	TFSI	[PP14][TFSI]	n-methyl-n-butyl-piperidinium bis((trifluoromethyl)sulfonyl)imide	C12H22F6N2O4S2	348.15	1.41558	train				1													2				2	3						8							1				2
105	1208	09009-03001	PP14	TFSI	[PP14][TFSI]	n-methyl-n-butyl-piperidinium bis((trifluoromethyl)sulfonyl)imide	C12H22F6N2O4S2	353.15	1.41423	train				1													2				2	3						8							1				2
107	1209	11001-02001	C4py	BF4	[C4py][BF4]	n-butylpyridinium tetrafluoroborate	C9H14BF4N	298.15	1.4455	train			1							1											1	3						5
11	1210	11001-02001	C4py	BF4	[C4py][BF5]	n-butylpyridinium tetrafluoroborate	C9H14BF4N	303.15	1.4444	test			1							1											1	3						5
11	1211	11001-02001	C4py	BF4	[C4py][BF6]	n-butylpyridinium tetrafluoroborate	C9H14BF4N	313.15	1.4418	train			1							1											1	3						5
11	1212	11001-02001	C4py	BF4	[C4py][BF7]	n-butylpyridinium tetrafluoroborate	C9H14BF4N	323.15	1.4392	train			1							1											1	3						5
11	1213	11001-02001	C4py	BF4	[C4py][BF8]	n-butylpyridinium tetrafluoroborate	C9H14BF4N	333.15	1.4366	train			1							1											1	3						5
11	1214	11001-02001	C4py	BF4	[C4py][BF9]	n-butylpyridinium tetrafluoroborate	C9H14BF4N	343.15	1.4341	train			1							1											1	3						5
11	1215	11001-02001	C4py	BF4	[C4py][BF10]	n-butylpyridinium tetrafluoroborate	C9H14BF4N	353.15	1.4315	test			1							1											1	3						5
106	1216	11001-02001	C4py	BF4	[C4py][BF11]	n-butylpyridinium tetrafluoroborate	C9H14BF4N	293.15	1.447	train			1							1											1	3						5
106	1217	11001-02001	C4py	BF4	[C4py][BF12]	n-butylpyridinium tetrafluoroborate	C9H14BF4N	303.15	1.4444	train			1							1											1	3						5
106	1218	11001-02001	C4py	BF4	[C4py][BF13]	n-butylpyridinium tetrafluoroborate	C9H14BF4N	313.15	1.4418	train			1							1											1	3						5
106	1219	11001-02001	C4py	BF4	[C4py][BF14]	n-butylpyridinium tetrafluoroborate	C9H14BF4N	323.15	1.4392	train			1							1											1	3						5
106	1220	11001-02001	C4py	BF4	[C4py][BF15]	n-butylpyridinium tetrafluoroborate	C9H14BF4N	333.15	1.4366	test			1							1											1	3						5
106	1221	11001-02001	C4py	BF4	[C4py][BF16]	n-butylpyridinium tetrafluoroborate	C9H14BF4N	343.15	1.4341	train			1							1											1	3						5
106	1222	11001-02001	C4py	BF4	[C4py][BF17]	n-butylpyridinium tetrafluoroborate	C9H14BF4N	353.15	1.4315	train			1							1											1	3						5
83	1223	11001-03001	C4py	TFSI	[C4py][TFSI]	n-butyl pyridinium bis((trifluoromethyl)sulfonyl)imide	C11H14F6N2O4S2	293.15	1.44537	train			1														2				1	3						5							1				2
83	1224	11001-03001	C4py	TFSI	[C4py][TFSI]	n-butyl pyridinium bis((trifluoromethyl)sulfonyl)imide	C11H14F6N2O4S2	298.15	1.44379	train			1														2				1	3						5							1				2
83	1225	11001-03001	C4py	TFSI	[C4py][TFSI]	n-butyl pyridinium bis((trifluoromethyl)sulfonyl)imide	C11H14F6N2O4S2	303.15	1.44211	test			1														2				1	3						5							1				2
83	1226	11001-03001	C4py	TFSI	[C4py][TFSI]	n-butyl pyridinium bis((trifluoromethyl)sulfonyl)imide	C11H14F6N2O4S2	308.15	1.44057	train			1														2				1	3						5							1				2
83	1227	11001-03001	C4py	TFSI	[C4py][TFSI]	n-butyl pyridinium bis((trifluoromethyl)sulfonyl)imide	C11H14F6N2O4S2	313.15	1.43911	train			1														2				1	3						5							1				2
83	1228	11001-03001	C4py	TFSI	[C4py][TFSI]	n-butyl pyridinium bis((trifluoromethyl)sulfonyl)imide	C11H14F6N2O4S2	318.15	1.43769	train			1														2				1	3						5							1				2
83	1229	11001-03001	C4py	TFSI	[C4py][TFSI]	n-butyl pyridinium bis((trifluoromethyl)sulfonyl)imide	C11H14F6N2O4S2	323.15	1.43631	train			1														2				1	3						5							1				2
83	1230	11001-03001	C4py	TFSI	[C4py][TFSI]	n-butyl pyridinium bis((trifluoromethyl)sulfonyl)imide	C11H14F6N2O4S2	328.15	1.43496	test			1														2				1	3						5							1				2
83	1231	11001-03001	C4py	TFSI	[C4py][TFSI]	n-butyl pyridinium bis((trifluoromethyl)sulfonyl)imide	C11H14F6N2O4S2	333.15	1.43359	train			1														2				1	3						5							1				2
108	1232	11001-03001	C4py	TFSI	[C4py][TFSI]	n-butyl pyridinium bis((trifluoromethyl)sulfonyl)imide	C11H14F6N2O4S2	303.15	1.4415	train			1														2				1	3						5							1				2
108	1233	11001-03001	C4py	TFSI	[C4py][TFSI]	n-butyl pyridinium bis((trifluoromethyl)sulfonyl)imide	C11H14F6N2O4S2	313.15	1.4386	train			1														2				1	3						5							1				2
108	1234	11001-03001	C4py	TFSI	[C4py][TFSI]	n-butyl pyridinium bis((trifluoromethyl)sulfonyl)imide	C11H14F6N2O4S2	323.15	1.4356	train			1														2				1	3						5							1				2
108	1235	11001-03001	C4py	TFSI	[C4py][TFSI]	n-butyl pyridinium bis((trifluoromethyl)sulfonyl)imide	C11H14F6N2O4S2	333.15	1.4327	test			1														2				1	3						5							1				2
108	1236	11001-03001	C4py	TFSI	[C4py][TFSI]	n-butyl pyridinium bis((trifluoromethyl)sulfonyl)imide	C11H14F6N2O4S2	343.15	1.4298	train			1														2				1	3						5							1				2
108	1237	11001-03001	C4py	TFSI	[C4py][TFSI]	n-butyl pyridinium bis((trifluoromethyl)sulfonyl)imide	C11H14F6N2O4S2	353.15	1.4269	train			1														2				1	3						5							1				2
107	1238	11002-02001	C6py	BF4	[C6py][BF4]	n-hexyl pyridinium tetrafluoroborate	C11H18BF4N	298.15	1.4474	train			1							1											1	5						5
83	1239	11003-03001	C8py	TFSI	[C8py][TFSI]	n-octyl pyridinium bis((trifluoromethyl)sulfonyl)imide	C15H22F6N2O4S2	293.15	1.4487	train			1														2				1	7						5							1				2
83	1240	11003-03001	C8py	TFSI	[C8py][TFSI]	n-octyl pyridinium bis((trifluoromethyl)sulfonyl)imide	C15H22F6N2O4S2	298.15	1.44723	test			1														2				1	7						5							1				2
83	1241	11003-03001	C8py	TFSI	[C8py][TFSI]	n-octyl pyridinium bis((trifluoromethyl)sulfonyl)imide	C15H22F6N2O4S2	303.15	1.44568	train			1														2				1	7						5							1				2
83	1242	11003-03001	C8py	TFSI	[C8py][TFSI]	n-octyl pyridinium bis((trifluoromethyl)sulfonyl)imide	C15H22F6N2O4S2	308.15	1.44413	train			1														2				1	7						5							1				2
83	1243	11003-03001	C8py	TFSI	[C8py][TFSI]	n-octyl pyridinium bis((trifluoromethyl)sulfonyl)imide	C15H22F6N2O4S2	313.15	1.44262	train			1														2				1	7						5							1				2
83	1244	11003-03001	C8py	TFSI	[C8py][TFSI]	n-octyl pyridinium bis((trifluoromethyl)sulfonyl)imide	C15H22F6N2O4S2	318.15	1.44115	train			1														2				1	7						5							1				2
83	1245	11003-03001	C8py	TFSI	[C8py][TFSI]	n-octyl pyridinium bis((trifluoromethyl)sulfonyl)imide	C15H22F6N2O4S2	323.15	1.43972	test			1														2				1	7						5							1				2
83	1246	11003-03001	C8py	TFSI	[C8py][TFSI]	n-octyl pyridinium bis((trifluoromethyl)sulfonyl)imide	C15H22F6N2O4S2	328.15	1.43827	train			1														2				1	7						5							1				2
83	1247	11003-03001	C8py	TFSI	[C8py][TFSI]	n-octyl pyridinium bis((trifluoromethyl)sulfonyl)imide	C15H22F6N2O4S2	333.15	1.43681	train			1														2				1	7						5							1				2
109	1248	11003-03001	C8py	TFSI	[C8py][TFSI]	n-octyl pyridinium bis((trifluoromethyl)sulfonyl)imide	C15H22F6N2O4S2	293.15	1.4476	train			1														2				1	7						5							1				2
83	1249	11004-03001	C10py	TFSI	[C10py][TFSI]	n-decyl pyridinium bis((trifluoromethyl)sulfonyl)imide	C17H26F6N2O4S2	293.15	1.45007	train			1														2				1	9						5							1				2
83	1250	11004-03001	C10py	TFSI	[C10py][TFSI]	n-decyl pyridinium bis((trifluoromethyl)sulfonyl)imide	C17H26F6N2O4S2	298.15	1.44859	test			1														2				1	9						5							1				2
83	1251	11004-03001	C10py	TFSI	[C10py][TFSI]	n-decyl pyridinium bis((trifluoromethyl)sulfonyl)imide	C17H26F6N2O4S2	303.15	1.44703	train			1														2				1	9						5							1				2
83	1252	11004-03001	C10py	TFSI	[C10py][TFSI]	n-decyl pyridinium bis((trifluoromethyl)sulfonyl)imide	C17H26F6N2O4S2	308.15	1.44546	train			1														2				1	9						5							1				2
83	1253	11004-03001	C10py	TFSI	[C10py][TFSI]	n-decyl pyridinium bis((trifluoromethyl)sulfonyl)imide	C17H26F6N2O4S2	313.15	1.44391	train			1														2				1	9						5							1				2
83	1254	11004-03001	C10py	TFSI	[C10py][TFSI]	n-decyl pyridinium bis((trifluoromethyl)sulfonyl)imide	C17H26F6N2O4S2	318.15	1.44239	train			1														2				1	9						5							1				2
83	1255	11004-03001	C10py	TFSI	[C10py][TFSI]	n-decyl pyridinium bis((trifluoromethyl)sulfonyl)imide	C17H26F6N2O4S2	323.15	1.44091	test			1														2				1	9						5							1				2
83	1256	11004-03001	C10py	TFSI	[C10py][TFSI]	n-decyl pyridinium bis((trifluoromethyl)sulfonyl)imide	C17H26F6N2O4S2	328.15	1.43943	train			1														2				1	9						5							1				2
83	1257	11004-03001	C10py	TFSI	[C10py][TFSI]	n-decyl pyridinium bis((trifluoromethyl)sulfonyl)imide	C17H26F6N2O4S2	333.15	1.43796	train			1														2				1	9						5							1				2
83	1258	11005-03001	C12py	TFSI	[C12py][TFSI]	n-dodecyl pyridinium bis((trifluoromethyl)sulfonyl)imide	C19H30F6N2O4S2	293.15	1.45131	train			1														2				1	11						5							1				2
83	1259	11005-03001	C12py	TFSI	[C12py][TFSI]	n-dodecyl pyridinium bis((trifluoromethyl)sulfonyl)imide	C19H30F6N2O4S2	298.15	1.44969	train			1														2				1	11						5							1				2
83	1260	11005-03001	C12py	TFSI	[C12py][TFSI]	n-dodecyl pyridinium bis((trifluoromethyl)sulfonyl)imide	C19H30F6N2O4S2	303.15	1.44818	test			1														2				1	11						5							1				2
83	1261	11005-03001	C12py	TFSI	[C12py][TFSI]	n-dodecyl pyridinium bis((trifluoromethyl)sulfonyl)imide	C19H30F6N2O4S2	308.15	1.44668	train			1														2				1	11						5							1				2
83	1262	11005-03001	C12py	TFSI	[C12py][TFSI]	n-dodecyl pyridinium bis((trifluoromethyl)sulfonyl)imide	C19H30F6N2O4S2	313.15	1.44524	train			1														2				1	11						5							1				2
83	1263	11005-03001	C12py	TFSI	[C12py][TFSI]	n-dodecyl pyridinium bis((trifluoromethyl)sulfonyl)imide	C19H30F6N2O4S2	318.15	1.44379	train			1														2				1	11						5							1				2
83	1264	11005-03001	C12py	TFSI	[C12py][TFSI]	n-dodecyl pyridinium bis((trifluoromethyl)sulfonyl)imide	C19H30F6N2O4S2	323.15	1.44235	train			1														2				1	11						5							1				2
83	1265	11005-03001	C12py	TFSI	[C12py][TFSI]	n-dodecyl pyridinium bis((trifluoromethyl)sulfonyl)imide	C19H30F6N2O4S2	328.15	1.4409	test			1														2				1	11						5							1				2
83	1266	11005-03001	C12py	TFSI	[C12py][TFSI]	n-dodecyl pyridinium bis((trifluoromethyl)sulfonyl)imide	C19H30F6N2O4S2	333.15	1.43946	train			1														2				1	11						5							1				2
107	1267	11009-02001	C4M'py	BF4	[C4M'py][BF4]	4-methyl-n-butylpyridinium tetrafluoroborate	C10H16BF4N	298.15	1.4526	train			1							1											2	3						4
86	1268	11009-02001	C4M'py	BF4	[C4M'py][BF4]	4-methyl-n-butylpyridinium tetrafluoroborate	C10H16BF4N	298.15	1.4507	train			1							1											2	3						4
106	1269	11009-03001	C4M'py	TFSI	[C4M'py][TFSI]	1-butyl-4-methylpyridinium bis((trifluoromethyl)sulfonyl)amide	C12H16F6N2O4S2	293.15	1.448	train			1														2				2	3						4							1				2
106	1270	11009-03001	C4M'py	TFSI	[C4M'py][TFSI]	1-butyl-4-methylpyridinium bis((trifluoromethyl)sulfonyl)amide	C12H16F6N2O4S2	303.15	1.4449	test			1														2				2	3						4							1				2
106	1271	11009-03001	C4M'py	TFSI	[C4M'py][TFSI]	1-butyl-4-methylpyridinium bis((trifluoromethyl)sulfonyl)amide	C12H16F6N2O4S2	313.15	1.4419	train			1														2				2	3						4							1				2
106	1272	11009-03001	C4M'py	TFSI	[C4M'py][TFSI]	1-butyl-4-methylpyridinium bis((trifluoromethyl)sulfonyl)amide	C12H16F6N2O4S2	323.15	1.4388	train			1														2				2	3						4							1				2
106	1273	11009-03001	C4M'py	TFSI	[C4M'py][TFSI]	1-butyl-4-methylpyridinium bis((trifluoromethyl)sulfonyl)amide	C12H16F6N2O4S2	333.15	1.4358	train			1														2				2	3						4							1				2
106	1274	11009-03001	C4M'py	TFSI	[C4M'py][TFSI]	1-butyl-4-methylpyridinium bis((trifluoromethyl)sulfonyl)amide	C12H16F6N2O4S2	343.15	1.4328	train			1														2				2	3						4							1				2
106	1275	11009-03001	C4M'py	TFSI	[C4M'py][TFSI]	1-butyl-4-methylpyridinium bis((trifluoromethyl)sulfonyl)amide	C12H16F6N2O4S2	353.15	1.4298	test			1														2				2	3						4							1				2
110	1276	11025-03001	C2py	TFSI	[C2py][TFSI]	n-ethyl pyridinium bis((trifluoromethyl)sulfonyl)imide	C9H10F6N2O4S2	288.15	1.44405	train			1														2				1	2						5							1				2
110	1277	11025-03001	C2py	TFSI	[C2py][TFSI]	n-ethyl pyridinium bis((trifluoromethyl)sulfonyl)imide	C9H10F6N2O4S2	290.65	1.44331	train			1														2				1	2						5							1				2
110	1278	11025-03001	C2py	TFSI	[C2py][TFSI]	n-ethyl pyridinium bis((trifluoromethyl)sulfonyl)imide	C9H10F6N2O4S2	293.15	1.44256	train			1														2				1	2						5							1				2
110	1279	11025-03001	C2py	TFSI	[C2py][TFSI]	n-ethyl pyridinium bis((trifluoromethyl)sulfonyl)imide	C9H10F6N2O4S2	295.65	1.44183	train			1														2				1	2						5							1				2
110	1280	11025-03001	C2py	TFSI	[C2py][TFSI]	n-ethyl pyridinium bis((trifluoromethyl)sulfonyl)imide	C9H10F6N2O4S2	298.15	1.44107	test			1														2				1	2						5							1				2
110	1281	11025-03001	C2py	TFSI	[C2py][TFSI]	n-ethyl pyridinium bis((trifluoromethyl)sulfonyl)imide	C9H10F6N2O4S2	300.65	1.44032	train			1														2				1	2						5							1				2
110	1282	11025-03001	C2py	TFSI	[C2py][TFSI]	n-ethyl pyridinium bis((trifluoromethyl)sulfonyl)imide	C9H10F6N2O4S2	303.15	1.43958	train			1														2				1	2						5							1				2
110	1283	11025-03001	C2py	TFSI	[C2py][TFSI]	n-ethyl pyridinium bis((trifluoromethyl)sulfonyl)imide	C9H10F6N2O4S2	305.65	1.43885	train			1														2				1	2						5							1				2
110	1284	11025-03001	C2py	TFSI	[C2py][TFSI]	n-ethyl pyridinium bis((trifluoromethyl)sulfonyl)imide	C9H10F6N2O4S2	308.15	1.43811	train			1														2				1	2						5							1				2
110	1285	11025-03001	C2py	TFSI	[C2py][TFSI]	n-ethyl pyridinium bis((trifluoromethyl)sulfonyl)imide	C9H10F6N2O4S2	310.65	1.43737	test			1														2				1	2						5							1				2
110	1286	11025-03001	C2py	TFSI	[C2py][TFSI]	n-ethyl pyridinium bis((trifluoromethyl)sulfonyl)imide	C9H10F6N2O4S2	313.15	1.43663	train			1														2				1	2						5							1				2
110	1287	11025-03001	C2py	TFSI	[C2py][TFSI]	n-ethyl pyridinium bis((trifluoromethyl)sulfonyl)imide	C9H10F6N2O4S2	315.65	1.43588	train			1														2				1	2						5							1				2
110	1288	11025-03001	C2py	TFSI	[C2py][TFSI]	n-ethyl pyridinium bis((trifluoromethyl)sulfonyl)imide	C9H10F6N2O4S2	318.15	1.43515	train			1														2				1	2						5							1				2
110	1289	11025-03001	C2py	TFSI	[C2py][TFSI]	n-ethyl pyridinium bis((trifluoromethyl)sulfonyl)imide	C9H10F6N2O4S2	320.65	1.43442	train			1														2				1	2						5							1				2
110	1290	11025-03001	C2py	TFSI	[C2py][TFSI]	n-ethyl pyridinium bis((trifluoromethyl)sulfonyl)imide	C9H10F6N2O4S2	323.15	1.43366	test			1														2				1	2						5							1				2
110	1291	11025-03001	C2py	TFSI	[C2py][TFSI]	n-ethyl pyridinium bis((trifluoromethyl)sulfonyl)imide	C9H10F6N2O4S2	325.65	1.43294	train			1														2				1	2						5							1				2
110	1292	11025-03001	C2py	TFSI	[C2py][TFSI]	n-ethyl pyridinium bis((trifluoromethyl)sulfonyl)imide	C9H10F6N2O4S2	328.15	1.43222	train			1														2				1	2						5							1				2
110	1293	11025-03001	C2py	TFSI	[C2py][TFSI]	n-ethyl pyridinium bis((trifluoromethyl)sulfonyl)imide	C9H10F6N2O4S2	330.65	1.43147	train			1														2				1	2						5							1				2
110	1294	11025-03001	C2py	TFSI	[C2py][TFSI]	n-ethyl pyridinium bis((trifluoromethyl)sulfonyl)imide	C9H10F6N2O4S2	333.15	1.43075	train			1														2				1	2						5							1				2
110	1295	11025-03001	C2py	TFSI	[C2py][TFSI]	n-ethyl pyridinium bis((trifluoromethyl)sulfonyl)imide	C9H10F6N2O4S2	335.65	1.43003	test			1														2				1	2						5							1				2
110	1296	11025-03001	C2py	TFSI	[C2py][TFSI]	n-ethyl pyridinium bis((trifluoromethyl)sulfonyl)imide	C9H10F6N2O4S2	338.15	1.4293	train			1														2				1	2						5							1				2
112	1297	11025-04018	C2py	EtSO4	[C2py][EtSO4]	n-ethyl pyridinium ethylsulfate	C9H15NO4S	298.15	1.50525	train			1														1				2	8						5	2
112	1298	11025-04018	C2py	EtSO4	[C2py][EtSO4]	n-ethyl pyridinium ethylsulfate	C9H15NO4S	303.15	1.50394	train			1														1				2	8						5	2
112	1299	11025-04018	C2py	EtSO4	[C2py][EtSO4]	n-ethyl pyridinium ethylsulfate	C9H15NO4S	308.15	1.50258	train			1														1				2	8						5	2
112	1300	11025-04018	C2py	EtSO4	[C2py][EtSO4]	n-ethyl pyridinium ethylsulfate	C9H15NO4S	313.15	1.5012	test			1														1				2	8						5	2
112	1301	11025-04018	C2py	EtSO4	[C2py][EtSO4]	n-ethyl pyridinium ethylsulfate	C9H15NO4S	318.15	1.49976	train			1														1				2	8						5	2
112	1302	11025-04018	C2py	EtSO4	[C2py][EtSO4]	n-ethyl pyridinium ethylsulfate	C9H15NO4S	323.15	1.4985	train			1														1				2	8						5	2
112	1303	11025-04018	C2py	EtSO4	[C2py][EtSO4]	n-ethyl pyridinium ethylsulfate	C9H15NO4S	328.15	1.4972	train			1														1				2	8						5	2
112	1304	11025-04018	C2py	EtSO4	[C2py][EtSO4]	n-ethyl pyridinium ethylsulfate	C9H15NO4S	333.15	1.49587	train			1														1				2	8						5	2
112	1305	11025-04018	C2py	EtSO4	[C2py][EtSO4]	n-ethyl pyridinium ethylsulfate	C9H15NO4S	338.15	1.49454	test			1														1				2	8						5	2
112	1306	11025-04018	C2py	EtSO4	[C2py][EtSO4]	n-ethyl pyridinium ethylsulfate	C9H15NO4S	343.15	1.49309	train			1														1				2	8						5	2
111	1307	11025-04018	C2py	EtSO4	[C2py][EtSO4]	n-ethyl pyridinium ethylsulfate	C9H15NO4S	298.15	1.50525	train			1														1				2	8						5	2
121	1308	11038-04018	empy	EtSO4	[empy][EtSO4]	1-ethyl-3-methylpyridinium ethylsulfate	C10H17NO4S	298.15	1.50666	train			1														1				3	2						4	2
121	1309	11038-04018	empy	EtSO4	[empy][EtSO4]	1-ethyl-3-methylpyridinium ethylsulfate	C10H17NO4S	303.15	1.50525	train			1														1				3	2						4	2
121	1310	11038-04018	empy	EtSO4	[empy][EtSO4]	1-ethyl-3-methylpyridinium ethylsulfate	C10H17NO4S	308.15	1.50386	test			1														1				3	2						4	2
121	1311	11038-04018	empy	EtSO4	[empy][EtSO4]	1-ethyl-3-methylpyridinium ethylsulfate	C10H17NO4S	313.15	1.50246	train			1														1				3	2						4	2
121	1312	11038-04018	empy	EtSO4	[empy][EtSO4]	1-ethyl-3-methylpyridinium ethylsulfate	C10H17NO4S	318.15	1.50106	train			1														1				3	2						4	2
121	1313	11038-04018	empy	EtSO4	[empy][EtSO4]	1-ethyl-3-methylpyridinium ethylsulfate	C10H17NO4S	323.15	1.49965	train			1														1				3	2						4	2
121	1314	11038-04018	empy	EtSO4	[empy][EtSO4]	1-ethyl-3-methylpyridinium ethylsulfate	C10H17NO4S	328.15	1.49825	train			1														1				3	2						4	2
121	1315	11038-04018	empy	EtSO4	[empy][EtSO4]	1-ethyl-3-methylpyridinium ethylsulfate	C10H17NO4S	333.15	1.49683	test			1														1				3	2						4	2
121	1316	11038-04018	empy	EtSO4	[empy][EtSO4]	1-ethyl-3-methylpyridinium ethylsulfate	C10H17NO4S	338.15	1.4954	train			1														1				3	2						4	2
121	1317	11038-04018	empy	EtSO4	[empy][EtSO4]	1-ethyl-3-methylpyridinium ethylsulfate	C10H17NO4S	343.15	1.49361	train			1														1				3	2						4	2
121	1318	11038-04018	empy	EtSO4	[empy][EtSO4]	1-ethyl-3-methylpyridinium ethylsulfate	C10H17NO4S	298.15	1.50666	train			1														1				3	2						4	2
121	1319	11038-04018	empy	EtSO4	[empy][EtSO4]	1-ethyl-3-methylpyridinium ethylsulfate	C10H17NO4S	298.15	1.50666	train			1														1				3	2						4	2
121	1320	11038-04018	empy	EtSO4	[empy][EtSO4]	1-ethyl-3-methylpyridinium ethylsulfate	C10H17NO4S	298.15	1.50666	test			1														1				3	2						4	2
121	1321	11038-04018	empy	EtSO4	[empy][EtSO4]	1-ethyl-3-methylpyridinium ethylsulfate	C10H17NO4S	298.15	1.50666	train			1														1				3	2						4	2
121	1322	11038-04018	empy	EtSO4	[empy][EtSO4]	1-ethyl-3-methylpyridinium ethylsulfate	C10H17NO4S	298.15	1.50666	train			1														1				3	2						4	2
118	1323	11038-04018	empy	EtSO4	[empy][EtSO4]	1-ethyl-3-methylpyridinium ethylsulfate	C10H17NO4S	298.15	1.50591	train			1														1				3	2						4	2
118	1324	11038-04018	empy	EtSO4	[empy][EtSO4]	1-ethyl-3-methylpyridinium ethylsulfate	C10H17NO4S	298.15	1.50666	train			1														1				3	2						4	2
114	1325	11038-04018	empy	EtSO4	[empy][EtSO4]	1-ethyl-3-methylpyridinium ethylsulfate	C10H17NO4S	298.15	1.50591	test			1														1				3	2						4	2
115	1326	11038-04018	empy	EtSO4	[empy][EtSO4]	1-ethyl-3-methylpyridinium ethylsulfate	C10H17NO4S	298.15	1.50591	train			1														1				3	2						4	2
119	1327	11038-04018	empy	EtSO4	[empy][EtSO4]	1-ethyl-3-methylpyridinium ethylsulfate	C10H17NO4S	298.15	1.50591	train			1														1				3	2						4	2
117	1328	11038-04018	empy	EtSO4	[empy][EtSO4]	1-ethyl-3-methylpyridinium ethylsulfate	C10H17NO4S	298.15	1.50591	train			1														1				3	2						4	2
116	1329	11038-04018	empy	EtSO4	[empy][EtSO4]	1-ethyl-3-methylpyridinium ethylsulfate	C10H17NO4S	298.15	1.50591	train			1														1				3	2						4	2
120	1330	11038-04018	empy	EtSO4	[empy][EtSO4]	1-ethyl-3-methylpyridinium ethylsulfate	C10H17NO4S	298.15	1.50591	test			1														1				3	2						4	2
107	1331	11041-02001	bmpy	BF4	[bmpy][BF4]	1-butyl-3-methylpyridinium tetrafluoroborate	C10H16NBF4	298.15	1.4474	train			1							1											2	3						4
105	1332	11041-03001	bmpy	TFSI	[bmpy][TFSI]	1-butyl-3-methylpyridinium bis((trifluoromethyl)sulfonyl)imide	C12H16F6N2O4S2	288.15	1.44845	train			1														2				2	3						4							1				2
105	1333	11041-03001	bmpy	TFSI	[bmpy][TFSI]	1-butyl-3-methylpyridinium bis((trifluoromethyl)sulfonyl)imide	C12H16F6N2O4S2	293.15	1.44694	train			1														2				2	3						4							1				2
105	1334	11041-03001	bmpy	TFSI	[bmpy][TFSI]	1-butyl-3-methylpyridinium bis((trifluoromethyl)sulfonyl)imide	C12H16F6N2O4S2	298.15	1.44566	train			1														2				2	3						4							1				2
105	1335	11041-03001	bmpy	TFSI	[bmpy][TFSI]	1-butyl-3-methylpyridinium bis((trifluoromethyl)sulfonyl)imide	C12H16F6N2O4S2	303.15	1.44397	test			1														2				2	3						4							1				2
105	1336	11041-03001	bmpy	TFSI	[bmpy][TFSI]	1-butyl-3-methylpyridinium bis((trifluoromethyl)sulfonyl)imide	C12H16F6N2O4S2	308.15	1.44249	train			1														2				2	3						4							1				2
105	1337	11041-03001	bmpy	TFSI	[bmpy][TFSI]	1-butyl-3-methylpyridinium bis((trifluoromethyl)sulfonyl)imide	C12H16F6N2O4S2	313.15	1.44103	train			1														2				2	3						4							1				2
105	1338	11041-03001	bmpy	TFSI	[bmpy][TFSI]	1-butyl-3-methylpyridinium bis((trifluoromethyl)sulfonyl)imide	C12H16F6N2O4S2	318.15	1.43955	train			1														2				2	3						4							1				2
105	1339	11041-03001	bmpy	TFSI	[bmpy][TFSI]	1-butyl-3-methylpyridinium bis((trifluoromethyl)sulfonyl)imide	C12H16F6N2O4S2	323.15	1.4381	train			1														2				2	3						4							1				2
105	1340	11041-03001	bmpy	TFSI	[bmpy][TFSI]	1-butyl-3-methylpyridinium bis((trifluoromethyl)sulfonyl)imide	C12H16F6N2O4S2	328.15	1.43668	test			1														2				2	3						4							1				2
105	1341	11041-03001	bmpy	TFSI	[bmpy][TFSI]	1-butyl-3-methylpyridinium bis((trifluoromethyl)sulfonyl)imide	C12H16F6N2O4S2	333.15	1.43524	train			1														2				2	3						4							1				2
105	1342	11041-03001	bmpy	TFSI	[bmpy][TFSI]	1-butyl-3-methylpyridinium bis((trifluoromethyl)sulfonyl)imide	C12H16F6N2O4S2	338.15	1.43382	train			1														2				2	3						4							1				2
105	1343	11041-03001	bmpy	TFSI	[bmpy][TFSI]	1-butyl-3-methylpyridinium bis((trifluoromethyl)sulfonyl)imide	C12H16F6N2O4S2	343.15	1.4324	train			1														2				2	3						4							1				2
105	1344	11041-03001	bmpy	TFSI	[bmpy][TFSI]	1-butyl-3-methylpyridinium bis((trifluoromethyl)sulfonyl)imide	C12H16F6N2O4S2	348.15	1.43097	train			1														2				2	3						4							1				2
105	1345	11041-03001	bmpy	TFSI	[bmpy][TFSI]	1-butyl-3-methylpyridinium bis((trifluoromethyl)sulfonyl)imide	C12H16F6N2O4S2	353.15	1.42953	test			1														2				2	3						4							1				2
109	1346	11042-03001	bmmpy	TFSI	[bmmpy][TFSI]	1-butyl-3,5-dimethylpyridinium bis((trifluoromethane)sulfonyl)amide	C13H18F6N2O4S2	293.15	1.4559	train			1														2				3	3						3							1				2
109	1347	11042-03004	bmmpy	N(CN)2	[bmmpy][dca]	1-butyl-3,5-dimethylpyridinium dicyanamide	C13H18N4	293.15	1.5278	train			1													2					3	3						3							1
123	1348	11047-03001	hmmpy	TFSI	[hmmpy][TFSI]	1-hexyl-3,5-dimethylpyridinium bis((trifluoromethyl)sulfonyl)imide	C15H22F6N2O4S2	298.15	1.44978	train			1														2				3	5						3							1				2
122	1349	11047-03001	hmmpy	TFSI	[hmmpy][TFSI]	1-hexyl-3,5-dimethylpyridinium bis((trifluoromethyl)sulfonyl)imide	C15H22F6N2O4S2	298.15	1.44978	train			1														2				3	5						3							1				2
124	1350	11048-03001	hemmpy	TFSI	[hemmpy][TFSI]	1-hexyl-2-ethyl-3,5-dimethylpyridinium bis((trifluoromethyl)sulfonyl)imide	C17H26F6N2O4S2	298.15	1.45938	test			1														2				4	6						2							1				2
124	1351	11048-03001	hemmpy	TFSI	[hemmpy][TFSI]	1-hexyl-2-ethyl-3,5-dimethylpyridinium bis((trifluoromethyl)sulfonyl)imide	C17H26F6N2O4S2	303.15	1.45779	train			1														2				4	6						2							1				2
124	1352	11048-03001	hemmpy	TFSI	[hemmpy][TFSI]	1-hexyl-2-ethyl-3,5-dimethylpyridinium bis((trifluoromethyl)sulfonyl)imide	C17H26F6N2O4S2	308.15	1.45618	train			1														2				4	6						2							1				2
124	1353	11048-03001	hemmpy	TFSI	[hemmpy][TFSI]	1-hexyl-2-ethyl-3,5-dimethylpyridinium bis((trifluoromethyl)sulfonyl)imide	C17H26F6N2O4S2	313.15	1.45457	train			1														2				4	6						2							1				2
124	1354	11048-03001	hemmpy	TFSI	[hemmpy][TFSI]	1-hexyl-2-ethyl-3,5-dimethylpyridinium bis((trifluoromethyl)sulfonyl)imide	C17H26F6N2O4S2	318.15	1.45298	train			1														2				4	6						2							1				2
124	1355	11048-03001	hemmpy	TFSI	[hemmpy][TFSI]	1-hexyl-2-ethyl-3,5-dimethylpyridinium bis((trifluoromethyl)sulfonyl)imide	C17H26F6N2O4S2	323.15	1.45137	test			1														2				4	6						2							1				2
124	1356	11048-03001	hemmpy	TFSI	[hemmpy][TFSI]	1-hexyl-2-ethyl-3,5-dimethylpyridinium bis((trifluoromethyl)sulfonyl)imide	C17H26F6N2O4S2	328.15	1.44977	train			1														2				4	6						2							1				2
124	1357	11048-03001	hemmpy	TFSI	[hemmpy][TFSI]	1-hexyl-2-ethyl-3,5-dimethylpyridinium bis((trifluoromethyl)sulfonyl)imide	C17H26F6N2O4S2	333.15	1.44817	train			1														2				4	6						2							1				2
124	1358	11048-03001	hemmpy	TFSI	[hemmpy][TFSI]	1-hexyl-2-ethyl-3,5-dimethylpyridinium bis((trifluoromethyl)sulfonyl)imide	C17H26F6N2O4S2	338.15	1.4466	train			1														2				4	6						2							1				2
124	1359	11048-03001	hemmpy	TFSI	[hemmpy][TFSI]	1-hexyl-2-ethyl-3,5-dimethylpyridinium bis((trifluoromethyl)sulfonyl)imide	C17H26F6N2O4S2	343.15	1.44499	train			1														2				4	6						2							1				2
126	1360	11069-02001	C4M''Py	BF4	[C4M''Py][BF4]	n-butyl-2-methylpyridinium tetrafluoroborate	C12H16F6N2O4S2	288.15	1.46042	test			1							1											2	3						4
126	1361	11069-02001	C4M''Py	BF4	[C4M''Py][BF4]	n-butyl-2-methylpyridinium tetrafluoroborate	C12H16F6N2O4S2	290.65	1.45973	train			1							1											2	3						4
126	1362	11069-02001	C4M''Py	BF4	[C4M''Py][BF4]	n-butyl-2-methylpyridinium tetrafluoroborate	C12H16F6N2O4S2	293.15	1.45905	train			1							1											2	3						4
126	1363	11069-02001	C4M''Py	BF4	[C4M''Py][BF4]	n-butyl-2-methylpyridinium tetrafluoroborate	C12H16F6N2O4S2	295.65	1.45839	train			1							1											2	3						4
126	1364	11069-02001	C4M''Py	BF4	[C4M''Py][BF4]	n-butyl-2-methylpyridinium tetrafluoroborate	C12H16F6N2O4S2	298.15	1.45772	train			1							1											2	3						4
126	1365	11069-02001	C4M''Py	BF4	[C4M''Py][BF4]	n-butyl-2-methylpyridinium tetrafluoroborate	C12H16F6N2O4S2	300.65	1.45703	test			1							1											2	3						4
126	1366	11069-02001	C4M''Py	BF4	[C4M''Py][BF4]	n-butyl-2-methylpyridinium tetrafluoroborate	C12H16F6N2O4S2	303.15	1.45638	train			1							1											2	3						4
126	1367	11069-02001	C4M''Py	BF4	[C4M''Py][BF4]	n-butyl-2-methylpyridinium tetrafluoroborate	C12H16F6N2O4S2	305.65	1.4557	train			1							1											2	3						4
126	1368	11069-02001	C4M''Py	BF4	[C4M''Py][BF4]	n-butyl-2-methylpyridinium tetrafluoroborate	C12H16F6N2O4S2	308.15	1.45502	train			1							1											2	3						4
126	1369	11069-02001	C4M''Py	BF4	[C4M''Py][BF4]	n-butyl-2-methylpyridinium tetrafluoroborate	C12H16F6N2O4S2	310.65	1.45437	train			1							1											2	3						4
126	1370	11069-02001	C4M''Py	BF4	[C4M''Py][BF4]	n-butyl-2-methylpyridinium tetrafluoroborate	C12H16F6N2O4S2	313.15	1.45371	test			1							1											2	3						4
126	1371	11069-02001	C4M''Py	BF4	[C4M''Py][BF4]	n-butyl-2-methylpyridinium tetrafluoroborate	C12H16F6N2O4S2	315.65	1.45304	train			1							1											2	3						4
126	1372	11069-02001	C4M''Py	BF4	[C4M''Py][BF4]	n-butyl-2-methylpyridinium tetrafluoroborate	C12H16F6N2O4S2	318.15	1.45237	train			1							1											2	3						4
126	1373	11069-02001	C4M''Py	BF4	[C4M''Py][BF4]	n-butyl-2-methylpyridinium tetrafluoroborate	C12H16F6N2O4S2	320.65	1.45172	train			1							1											2	3						4
126	1374	11069-02001	C4M''Py	BF4	[C4M''Py][BF4]	n-butyl-2-methylpyridinium tetrafluoroborate	C12H16F6N2O4S2	323.15	1.45108	train			1							1											2	3						4
126	1375	11069-02001	C4M''Py	BF4	[C4M''Py][BF4]	n-butyl-2-methylpyridinium tetrafluoroborate	C12H16F6N2O4S2	325.65	1.45042	test			1							1											2	3						4
126	1376	11069-02001	C4M''Py	BF4	[C4M''Py][BF4]	n-butyl-2-methylpyridinium tetrafluoroborate	C12H16F6N2O4S2	328.15	1.44975	train			1							1											2	3						4
126	1377	11069-02001	C4M''Py	BF4	[C4M''Py][BF4]	n-butyl-2-methylpyridinium tetrafluoroborate	C12H16F6N2O4S2	330.65	1.44911	train			1							1											2	3						4
126	1378	11069-02001	C4M''Py	BF4	[C4M''Py][BF4]	n-butyl-2-methylpyridinium tetrafluoroborate	C12H16F6N2O4S2	333.15	1.44845	train			1							1											2	3						4
126	1379	11069-02001	C4M''Py	BF4	[C4M''Py][BF4]	n-butyl-2-methylpyridinium tetrafluoroborate	C12H16F6N2O4S2	335.65	1.44782	train			1							1											2	3						4
126	1380	11069-02001	C4M''Py	BF4	[C4M''Py][BF4]	n-butyl-2-methylpyridinium tetrafluoroborate	C12H16F6N2O4S2	338.15	1.44725	test			1							1											2	3						4
125	1381	11069-02001	C4M''Py	BF4	[C4M''Py][BF4]	n-butyl-2-methylpyridinium tetrafluoroborate	C12H16F6N2O4S2	298.15	1.4545	train			1							1											2	3						4
125	1382	11069-02001	C4M''Py	BF4	[C4M''Py][BF4]	n-butyl-2-methylpyridinium tetrafluoroborate	C12H16F6N2O4S2	318.15	1.45	train			1							1											2	3						4
107	1383	11069-02001	C4M''Py	BF4	[C4M''Py][BF4]	n-butyl-2-methylpyridinium tetrafluoroborate	C12H16F6N2O4S2	298.15	1.454	train			1							1											2	3						4
113	1384	11074-03001	C3mpy	TFSI	[P13][TFSI]	3-methyl-1-propylpyridinium bis(trifluoromethylsulfonyl)imide	C11H14F6N2O4S2	298.15	1.44485	train			1														2				2	2						4							1				2
105	1385	11074-03001	C3mpy	TFSI	[C3mpy][TFSI]	3-methyl-1-propylpyridinium bis((trifluoromethane)sulfonyl)amide	C11H14N2F6S2O4	288.15	1.44734	test			1														2				2	2						4							1				2
105	1386	11074-03001	C3mpy	TFSI	[C3mpy][TFSI]	3-methyl-1-propylpyridinium bis((trifluoromethane)sulfonyl)amide	C11H14N2F6S2O4	293.15	1.44581	train			1														2				2	2						4							1				2
105	1387	11074-03001	C3mpy	TFSI	[C3mpy][TFSI]	3-methyl-1-propylpyridinium bis((trifluoromethane)sulfonyl)amide	C11H14N2F6S2O4	298.15	1.4444	train			1														2				2	2						4							1				2
105	1388	11074-03001	C3mpy	TFSI	[C3mpy][TFSI]	3-methyl-1-propylpyridinium bis((trifluoromethane)sulfonyl)amide	C11H14N2F6S2O4	303.15	1.44279	train			1														2				2	2						4							1				2
105	1389	11074-03001	C3mpy	TFSI	[C3mpy][TFSI]	3-methyl-1-propylpyridinium bis((trifluoromethane)sulfonyl)amide	C11H14N2F6S2O4	308.15	1.44129	train			1														2				2	2						4							1				2
105	1390	11074-03001	C3mpy	TFSI	[C3mpy][TFSI]	3-methyl-1-propylpyridinium bis((trifluoromethane)sulfonyl)amide	C11H14N2F6S2O4	313.15	1.43983	test			1														2				2	2						4							1				2
105	1391	11074-03001	C3mpy	TFSI	[C3mpy][TFSI]	3-methyl-1-propylpyridinium bis((trifluoromethane)sulfonyl)amide	C11H14N2F6S2O4	318.15	1.43836	train			1														2				2	2						4							1				2
105	1392	11074-03001	C3mpy	TFSI	[C3mpy][TFSI]	3-methyl-1-propylpyridinium bis((trifluoromethane)sulfonyl)amide	C11H14N2F6S2O4	323.15	1.43693	train			1														2				2	2						4							1				2
105	1393	11074-03001	C3mpy	TFSI	[C3mpy][TFSI]	3-methyl-1-propylpyridinium bis((trifluoromethane)sulfonyl)amide	C11H14N2F6S2O4	328.15	1.43546	train			1														2				2	2						4							1				2
105	1394	11074-03001	C3mpy	TFSI	[C3mpy][TFSI]	3-methyl-1-propylpyridinium bis((trifluoromethane)sulfonyl)amide	C11H14N2F6S2O4	333.15	1.43405	train			1														2				2	2						4							1				2
105	1395	11074-03001	C3mpy	TFSI	[C3mpy][TFSI]	3-methyl-1-propylpyridinium bis((trifluoromethane)sulfonyl)amide	C11H14N2F6S2O4	338.15	1.43266	test			1														2				2	2						4							1				2
105	1396	11074-03001	C3mpy	TFSI	[C3mpy][TFSI]	3-methyl-1-propylpyridinium bis((trifluoromethane)sulfonyl)amide	C11H14N2F6S2O4	343.15	1.4312	train			1														2				2	2						4							1				2
105	1397	11074-03001	C3mpy	TFSI	[C3mpy][TFSI]	3-methyl-1-propylpyridinium bis((trifluoromethane)sulfonyl)amide	C11H14N2F6S2O4	348.15	1.42977	train			1														2				2	2						4							1				2
105	1398	11074-03001	C3mpy	TFSI	[C3mpy][TFSI]	3-methyl-1-propylpyridinium bis((trifluoromethane)sulfonyl)amide	C11H14N2F6S2O4	353.15	1.42839	train			1														2				2	2						4							1				2
127	1399	11077-04017	C1mpy	MeSO4	[C1mpy][MeSO4]	1,3-dimethylpyridinium methylsulfate	C8H13NSO4	293.15	1.5147	train			1														1				3							4	2
127	1400	11077-04017	C1mpy	MeSO4	[C1mpy][MeSO4]	1,3-dimethylpyridinium methylsulfate	C8H13NSO4	298.15	1.5133	test			1														1				3							4	2
127	1401	11077-04017	C1mpy	MeSO4	[C1mpy][MeSO4]	1,3-dimethylpyridinium methylsulfate	C8H13NSO4	303.15	1.51184	train			1														1				3							4	2
127	1402	11077-04017	C1mpy	MeSO4	[C1mpy][MeSO4]	1,3-dimethylpyridinium methylsulfate	C8H13NSO4	308.15	1.51051	train			1														1				3							4	2
127	1403	11077-04017	C1mpy	MeSO4	[C1mpy][MeSO4]	1,3-dimethylpyridinium methylsulfate	C8H13NSO4	313.15	1.50911	train			1														1				3							4	2
127	1404	11077-04017	C1mpy	MeSO4	[C1mpy][MeSO4]	1,3-dimethylpyridinium methylsulfate	C8H13NSO4	318.15	1.5077	train			1														1				3							4	2
127	1405	11077-04017	C1mpy	MeSO4	[C1mpy][MeSO4]	1,3-dimethylpyridinium methylsulfate	C8H13NSO4	323.15	1.5062	test			1														1				3							4	2
127	1406	11077-04017	C1mpy	MeSO4	[C1mpy][MeSO4]	1,3-dimethylpyridinium methylsulfate	C8H13NSO4	328.15	1.50472	train			1														1				3							4	2
127	1407	11077-04017	C1mpy	MeSO4	[C1mpy][MeSO4]	1,3-dimethylpyridinium methylsulfate	C8H13NSO4	333.15	1.50331	train			1														1				3							4	2
127	1408	11077-04017	C1mpy	MeSO4	[C1mpy][MeSO4]	1,3-dimethylpyridinium methylsulfate	C8H13NSO4	338.15	1.50193	train			1														1				3							4	2
127	1409	11077-04017	C1mpy	MeSO4	[C1mpy][MeSO4]	1,3-dimethylpyridinium methylsulfate	C8H13NSO4	343.15	1.50046	train			1														1				3							4	2
127	1410	11079-04017	Mpy	MeSO4	[Mpy][MeSO4]	1-methylpyridinium methylsulfate	C7H11NSO4	293.15	1.51431	test			1														1				2							5	2
127	1411	11079-04017	Mpy	MeSO4	[Mpy][MeSO4]	1-methylpyridinium methylsulfate	C7H11NSO4	298.15	1.51296	train			1														1				2							5	2
127	1412	11079-04017	Mpy	MeSO4	[Mpy][MeSO4]	1-methylpyridinium methylsulfate	C7H11NSO4	303.15	1.51162	train			1														1				2							5	2
127	1413	11079-04017	Mpy	MeSO4	[Mpy][MeSO4]	1-methylpyridinium methylsulfate	C7H11NSO4	308.15	1.51029	train			1														1				2							5	2
127	1414	11079-04017	Mpy	MeSO4	[Mpy][MeSO4]	1-methylpyridinium methylsulfate	C7H11NSO4	313.15	1.50895	train			1														1				2							5	2
127	1415	11079-04017	Mpy	MeSO4	[Mpy][MeSO4]	1-methylpyridinium methylsulfate	C7H11NSO4	318.15	1.50764	test			1														1				2							5	2
127	1416	11079-04017	Mpy	MeSO4	[Mpy][MeSO4]	1-methylpyridinium methylsulfate	C7H11NSO4	323.15	1.50629	train			1														1				2							5	2
127	1417	11079-04017	Mpy	MeSO4	[Mpy][MeSO4]	1-methylpyridinium methylsulfate	C7H11NSO4	328.15	1.50497	train			1														1				2							5	2
127	1418	11079-04017	Mpy	MeSO4	[Mpy][MeSO4]	1-methylpyridinium methylsulfate	C7H11NSO4	333.15	1.50361	train			1														1				2							5	2
127	1419	11079-04017	Mpy	MeSO4	[Mpy][MeSO4]	1-methylpyridinium methylsulfate	C7H11NSO4	338.15	1.50226	train			1														1				2							5	2
127	1420	11079-04017	Mpy	MeSO4	[Mpy][MeSO4]	1-methylpyridinium methylsulfate	C7H11NSO4	343.15	1.5009	test			1														1				2							5	2
68	1421	11079-04017	Mpy	MeSO4	[Mpy][MeSO4]	1-methylpyridinium methylsulfate	C7H11NSO4	288.15	1.51603	train			1														1				2							5	2
68	1422	11079-04017	Mpy	MeSO4	[Mpy][MeSO4]	1-methylpyridinium methylsulfate	C7H11NSO4	298.15	1.5134	train			1														1				2							5	2
68	1423	11079-04017	Mpy	MeSO4	[Mpy][MeSO4]	1-methylpyridinium methylsulfate	C7H11NSO4	308.15	1.51077	train			1														1				2							5	2
129	1424	11080-02001	C3py	BF4	[C3py][BF4]	1-propylpyridinium tetrafluoroborate	C8H12BF4N	283.15	1.44855	train			1							1											1	2						5
129	1425	11080-02001	C3py	BF4	[C3py][BF4]	1-propylpyridinium tetrafluoroborate	C8H12BF4N	285.65	1.44789	test			1							1											1	2						5
129	1426	11080-02001	C3py	BF4	[C3py][BF4]	1-propylpyridinium tetrafluoroborate	C8H12BF4N	288.15	1.44723	train			1							1											1	2						5
129	1427	11080-02001	C3py	BF4	[C3py][BF4]	1-propylpyridinium tetrafluoroborate	C8H12BF4N	290.65	1.44655	train			1							1											1	2						5
129	1428	11080-02001	C3py	BF4	[C3py][BF4]	1-propylpyridinium tetrafluoroborate	C8H12BF4N	293.15	1.44588	train			1							1											1	2						5
129	1429	11080-02001	C3py	BF4	[C3py][BF4]	1-propylpyridinium tetrafluoroborate	C8H12BF4N	295.65	1.44522	train			1							1											1	2						5
129	1430	11080-02001	C3py	BF4	[C3py][BF4]	1-propylpyridinium tetrafluoroborate	C8H12BF4N	298.15	1.44455	test			1							1											1	2						5
129	1431	11080-02001	C3py	BF4	[C3py][BF4]	1-propylpyridinium tetrafluoroborate	C8H12BF4N	300.65	1.44389	train			1							1											1	2						5
129	1432	11080-02001	C3py	BF4	[C3py][BF4]	1-propylpyridinium tetrafluoroborate	C8H12BF4N	303.15	1.44322	train			1							1											1	2						5
129	1433	11080-02001	C3py	BF4	[C3py][BF4]	1-propylpyridinium tetrafluoroborate	C8H12BF4N	305.65	1.44256	train			1							1											1	2						5
129	1434	11080-02001	C3py	BF4	[C3py][BF4]	1-propylpyridinium tetrafluoroborate	C8H12BF4N	308.15	1.4419	train			1							1											1	2						5
129	1435	11080-02001	C3py	BF4	[C3py][BF4]	1-propylpyridinium tetrafluoroborate	C8H12BF4N	310.65	1.44123	test			1							1											1	2						5
129	1436	11080-02001	C3py	BF4	[C3py][BF4]	1-propylpyridinium tetrafluoroborate	C8H12BF4N	313.15	1.44057	train			1							1											1	2						5
129	1437	11080-02001	C3py	BF4	[C3py][BF4]	1-propylpyridinium tetrafluoroborate	C8H12BF4N	315.65	1.4399	train			1							1											1	2						5
129	1438	11080-02001	C3py	BF4	[C3py][BF4]	1-propylpyridinium tetrafluoroborate	C8H12BF4N	318.15	1.43924	train			1							1											1	2						5
129	1439	11080-02001	C3py	BF4	[C3py][BF4]	1-propylpyridinium tetrafluoroborate	C8H12BF4N	320.65	1.43859	train			1							1											1	2						5
129	1440	11080-02001	C3py	BF4	[C3py][BF4]	1-propylpyridinium tetrafluoroborate	C8H12BF4N	323.15	1.43792	test			1							1											1	2						5
129	1441	11080-02001	C3py	BF4	[C3py][BF4]	1-propylpyridinium tetrafluoroborate	C8H12BF4N	325.65	1.43726	train			1							1											1	2						5
129	1442	11080-02001	C3py	BF4	[C3py][BF4]	1-propylpyridinium tetrafluoroborate	C8H12BF4N	328.15	1.43659	train			1							1											1	2						5
129	1443	11080-02001	C3py	BF4	[C3py][BF4]	1-propylpyridinium tetrafluoroborate	C8H12BF4N	330.65	1.43593	train			1							1											1	2						5
129	1444	11080-02001	C3py	BF4	[C3py][BF4]	1-propylpyridinium tetrafluoroborate	C8H12BF4N	333.15	1.43528	train			1							1											1	2						5
129	1445	11080-02001	C3py	BF4	[C3py][BF4]	1-propylpyridinium tetrafluoroborate	C8H12BF4N	335.65	1.43463	test			1							1											1	2						5
129	1446	11080-02001	C3py	BF4	[C3py][BF4]	1-propylpyridinium tetrafluoroborate	C8H12BF4N	338.15	1.43398	train			1							1											1	2						5
128	1447	11080-02001	C3py	BF4	[C3py][BF4]	1-propylpyridinium tetrafluoroborate	C8H12BF4N	293.15	1.44588	train			1							1											1	2						5
128	1448	11080-02001	C3py	BF4	[C3py][BF4]	1-propylpyridinium tetrafluoroborate	C8H12BF4N	303.15	1.44322	train			1							1											1	2						5
128	1449	11080-02001	C3py	BF4	[C3py][BF4]	1-propylpyridinium tetrafluoroborate	C8H12BF4N	313.15	1.44057	train			1							1											1	2						5
128	1450	11080-02001	C3py	BF4	[C3py][BF4]	1-propylpyridinium tetrafluoroborate	C8H12BF4N	323.15	1.43792	test			1							1											1	2						5
127	1451	11085-04018	Eepy	EtSO4	[Eepy][EtSO4]	1,2-diethylpyridinium ethylsulfate	C11H19NSO4	293.15	1.5146	train			1														1				3	3						4	2
127	1452	11085-04018	Eepy	ESO4	[Eepy][EtSO4]	1,2-diethylpyridinium ethylsulfate	C11H19NSO4	298.15	1.51328	train			1														1				3	3						4	2
127	1453	11085-04018	Eepy	ESO4	[Eepy][EtSO4]	1,2-diethylpyridinium ethylsulfate	C11H19NSO4	303.15	1.51192	train			1														1				3	3						4	2
127	1454	11085-04018	Eepy	ESO4	[Eepy][EtSO4]	1,2-diethylpyridinium ethylsulfate	C11H19NSO4	308.15	1.51057	train			1														1				3	3						4	2
127	1455	11085-04018	Eepy	ESO4	[Eepy][EtSO4]	1,2-diethylpyridinium ethylsulfate	C11H19NSO4	313.15	1.5092	test			1														1				3	3						4	2
127	1456	11085-04018	Eepy	ESO4	[Eepy][EtSO4]	1,2-diethylpyridinium ethylsulfate	C11H19NSO4	318.15	1.50788	train			1														1				3	3						4	2
127	1457	11085-04018	Eepy	ESO4	[Eepy][EtSO4]	1,2-diethylpyridinium ethylsulfate	C11H19NSO4	323.15	1.50648	train			1														1				3	3						4	2
127	1458	11085-04018	Eepy	ESO4	[Eepy][EtSO4]	1,2-diethylpyridinium ethylsulfate	C11H19NSO4	328.15	1.50513	train			1														1				3	3						4	2
127	1459	11085-04018	Eepy	ESO4	[Eepy][EtSO4]	1,2-diethylpyridinium ethylsulfate	C11H19NSO4	333.15	1.50376	train			1														1				3	3						4	2
127	1460	11085-04018	Eepy	ESO4	[Eepy][EtSO4]	1,2-diethylpyridinium ethylsulfate	C11H19NSO4	338.15	1.50239	test			1														1				3	3						4	2
127	1461	11085-04018	Eepy	ESO4	[Eepy][EtSO4]	1,2-diethylpyridinium ethylsulfate	C11H19NSO4	343.15	1.5009	train			1														1				3	3						4	2
127	1462	11086-04017	Empy	MeSO4	[Empy][MeSO4]	2-ethyl-1-methylpyridinium methylsulfate	C9H15NSO4	293.15	1.52031	train			1														1				3	1						4	2
127	1463	11086-04017	Empy	MeSO4	[Empy][MeSO4]	2-ethyl-1-methylpyridinium methylsulfate	C9H15NSO4	298.15	1.51902	train			1														1				3	1						4	2
127	1464	11086-04017	Empy	MeSO4	[Empy][MeSO4]	2-ethyl-1-methylpyridinium methylsulfate	C9H15NSO4	303.15	1.5177	train			1														1				3	1						4	2
127	1465	11086-04017	Empy	MeSO4	[Empy][MeSO4]	2-ethyl-1-methylpyridinium methylsulfate	C9H15NSO4	308.15	1.5164	test			1														1				3	1						4	2
127	1466	11086-04017	Empy	MeSO4	[Empy][MeSO4]	2-ethyl-1-methylpyridinium methylsulfate	C9H15NSO4	313.15	1.51508	train			1														1				3	1						4	2
127	1467	11086-04017	Empy	MeSO4	[Empy][MeSO4]	2-ethyl-1-methylpyridinium methylsulfate	C9H15NSO4	318.15	1.51374	train			1														1				3	1						4	2
127	1468	11086-04017	Empy	MeSO4	[Empy][MeSO4]	2-ethyl-1-methylpyridinium methylsulfate	C9H15NSO4	323.15	1.51245	train			1														1				3	1						4	2
127	1469	11086-04017	Empy	MeSO4	[Empy][MeSO4]	2-ethyl-1-methylpyridinium methylsulfate	C9H15NSO4	328.15	1.51115	train			1														1				3	1						4	2
127	1470	11086-04017	Empy	MeSO4	[Empy][MeSO4]	2-ethyl-1-methylpyridinium methylsulfate	C9H15NSO4	333.15	1.50982	test			1														1				3	1						4	2
127	1471	11086-04017	Empy	MeSO4	[Empy][MeSO4]	2-ethyl-1-methylpyridinium methylsulfate	C9H15NSO4	338.15	1.50852	train			1														1				3	1						4	2
127	1472	11086-04017	Empy	MeSO4	[Empy][MeSO4]	2-ethyl-1-methylpyridinium methylsulfate	C9H15NSO4	343.15	1.50722	train			1														1				3	1						4	2
109	1473	11088-03001	O3M5MPYR	TFSI	[O3M5MPYR][TFSI]	1-octyl-3,5-dimethylpyridinium bis((trifluoromethane)sulfonyl)amide	C17H26F6N2O4S2	293.15	1.4526	train			1														2				3	7						3							1				2
109	1474	11088-03004	O3M5MPYR	dca	[O3M5MPYR][dca]	1-octyl-3,5-dimethylpyridinium dicyanamide	C17H26N4	293.15	1.5196	train			1													2					3	7						3							1
109	1475	11088-15003	O3M5MPYR	SCN	[O3M5MPYR][SCN]	1-octyl-3,5-dimethylpyridinium thiocyanate	C16H26N2S	293.15	1.5415	test			1													1					3	7						3					1
109	1476	11090-01003	O2M3M5MPYR	I	[O2M3M5MPYR]I	1-octyl-2,3,5-trimethylpyridinium iodine	C16H28NI	293.15	1.5776	train			1											1							4	7						2
109	1477	11090-03001	O2M3M5MPYR	TFSI	[O2M3M5MPYR][TFSI]	1-octyl-2,3,5-trimethylpyridinium bis((trifluoromethane)sulfonyl)amide	C18H28F6N2O4S2	293.15	1.4617	train			1														2				4	7						2							1				2
109	1478	11091-03001	B2M3MPYR	TFSI	[B2M3MPYR][TFSI]	1-butyl-2,3-dimethylpyridinium bis((trifluoromethane)sulfonyl)amide	C13H18F6N2O4S2	293.15	1.4497	train			1														2				3	3						3							1				2
109	1479	11091-03004	B2M3MPYR	dca	[B2M3MPYR][dca]	1-butyl-2,3-dimethylpyridinium dicyanamide	C13H18N4	293.15	1.5403	train			1													2					3	3						3							1
109	1480	11091-04003	B2M3MPYR	TfO	[B2M3MPYR][TfO]	1-butyl-2,3-dimethylpyridinium trifluoromethanesulfonate	C12H18F3NSO3	293.15	1.4748	test			1														1				3	3						3	1										1
109	1481	11092-03001	B2M5EPYR	TFSI	[B2M5EPYR][TFSI]	1-butyl-2-methyl-5-ethylpyridinium bis((trifluoromethane)sulfonyl)amide	C14H20F6N2O4S2	293.15	1.4552	train			1														2				3	4						3							1				2
109	1482	11093-03001	B2M3M5MPYR	TFSI	[B2M3M5MPYR][TFSI]	1-butyl-2,3,5-trimethylpyridinium bis((trifluoromethane)sulfonyl)amide	C14H20F6N2O4S2	293.15	1.4583	train			1														2				4	3						2							1				2
109	1483	11094-03001	O2M3MPYR	TFSI	[O2M3MPYR][TFSI]	1-octyl-2,3-dimethylpyridinium bis((trifluoromethane)sulfonyl)amide	C17H26F6N2O4S2	293.15	1.4571	train			1														2				3	7						3							1				2
109	1484	11094-04003	O2M3MPYR	TfO	[O2M3MPYR][TfO]	1-octyl-2,3-dimethylpyridinium trifluoromethanesulfonate	C16H26F3NSO3	293.15	1.4725	train			1														1				3	7						3	1										1
109	1485	11094-15003	O2M3MPYR	SCN	[O2M3MPYR][SCN]	1-octyl-2,3-dimethylpyridinium thiocyanate	C16H26N2S	293.15	1.5489	test			1													1					3	7						3					1
124	1486	11120-03001	1E3M5M2PPy	TFSI	[1E3M5M2PPy][TFSI]	1-ethyl-3,5-dimethyl-2-pentylpyridinium bis((trifluoromethane)sulfonyl)amide	C16H24F6N2O4S2	298.15	1.46108	train			1														2				4	5						2							1				2
124	1487	11120-03001	1E3M5M2PPy	TFSI	[1E3M5M2PPy][TFSI]	1-ethyl-3,5-dimethyl-2-pentylpyridinium bis((trifluoromethane)sulfonyl)amide	C16H24F6N2O4S2	303.15	1.45947	train			1														2				4	5						2							1				2
124	1488	11120-03001	1E3M5M2PPy	TFSI	[1E3M5M2PPy][TFSI]	1-ethyl-3,5-dimethyl-2-pentylpyridinium bis((trifluoromethane)sulfonyl)amide	C16H24F6N2O4S2	308.15	1.45787	train			1														2				4	5						2							1				2
124	1489	11120-03001	1E3M5M2PPy	TFSI	[1E3M5M2PPy][TFSI]	1-ethyl-3,5-dimethyl-2-pentylpyridinium bis((trifluoromethane)sulfonyl)amide	C16H24F6N2O4S2	313.15	1.45627	train			1														2				4	5						2							1				2
124	1490	11120-03001	1E3M5M2PPy	TFSI	[1E3M5M2PPy][TFSI]	1-ethyl-3,5-dimethyl-2-pentylpyridinium bis((trifluoromethane)sulfonyl)amide	C16H24F6N2O4S2	318.15	1.45463	test			1														2				4	5						2							1				2
124	1491	11120-03001	1E3M5M2PPy	TFSI	[1E3M5M2PPy][TFSI]	1-ethyl-3,5-dimethyl-2-pentylpyridinium bis((trifluoromethane)sulfonyl)amide	C16H24F6N2O4S2	323.15	1.45304	train			1														2				4	5						2							1				2
124	1492	11120-03001	1E3M5M2PPy	TFSI	[1E3M5M2PPy][TFSI]	1-ethyl-3,5-dimethyl-2-pentylpyridinium bis((trifluoromethane)sulfonyl)amide	C16H24F6N2O4S2	328.15	1.45139	train			1														2				4	5						2							1				2
124	1493	11120-03001	1E3M5M2PPy	TFSI	[1E3M5M2PPy][TFSI]	1-ethyl-3,5-dimethyl-2-pentylpyridinium bis((trifluoromethane)sulfonyl)amide	C16H24F6N2O4S2	333.15	1.44979	train			1														2				4	5						2							1				2
124	1494	11120-03001	1E3M5M2PPy	TFSI	[1E3M5M2PPy][TFSI]	1-ethyl-3,5-dimethyl-2-pentylpyridinium bis((trifluoromethane)sulfonyl)amide	C16H24F6N2O4S2	338.15	1.44822	train			1														2				4	5						2							1				2
124	1495	11120-03001	1E3M5M2PPy	TFSI	[1E3M5M2PPy][TFSI]	1-ethyl-3,5-dimethyl-2-pentylpyridinium bis((trifluoromethane)sulfonyl)amide	C16H24F6N2O4S2	343.15	1.44667	test			1														2				4	5						2							1				2
124	1496	11121-03001	1B3M5M2PPy	TFSI	[1B3M5M2PPy][TFSI]	1-butyl-3,5-dimethyl-2-pentylpyridinium bis((trifluoromethane)sulfonyl)amide	C18H28F6N2O4S2	298.15	1.4604	train			1														2				4	7						2							1				2
124	1497	11121-03001	1B3M5M2PPy	TFSI	[1B3M5M2PPy][TFSI]	1-butyl-3,5-dimethyl-2-pentylpyridinium bis((trifluoromethane)sulfonyl)amide	C18H28F6N2O4S2	303.15	1.45878	train			1														2				4	7						2							1				2
124	1498	11121-03001	1B3M5M2PPy	TFSI	[1B3M5M2PPy][TFSI]	1-butyl-3,5-dimethyl-2-pentylpyridinium bis((trifluoromethane)sulfonyl)amide	C18H28F6N2O4S2	308.15	1.45714	train			1														2				4	7						2							1				2
124	1499	11121-03001	1B3M5M2PPy	TFSI	[1B3M5M2PPy][TFSI]	1-butyl-3,5-dimethyl-2-pentylpyridinium bis((trifluoromethane)sulfonyl)amide	C18H28F6N2O4S2	313.15	1.45549	train			1														2				4	7						2							1				2
124	1500	11121-03001	1B3M5M2PPy	TFSI	[1B3M5M2PPy][TFSI]	1-butyl-3,5-dimethyl-2-pentylpyridinium bis((trifluoromethane)sulfonyl)amide	C18H28F6N2O4S2	318.15	1.45386	test			1														2				4	7						2							1				2
124	1501	11121-03001	1B3M5M2PPy	TFSI	[1B3M5M2PPy][TFSI]	1-butyl-3,5-dimethyl-2-pentylpyridinium bis((trifluoromethane)sulfonyl)amide	C18H28F6N2O4S2	323.15	1.45226	train			1														2				4	7						2							1				2
124	1502	11121-03001	1B3M5M2PPy	TFSI	[1B3M5M2PPy][TFSI]	1-butyl-3,5-dimethyl-2-pentylpyridinium bis((trifluoromethane)sulfonyl)amide	C18H28F6N2O4S2	328.15	1.45065	train			1														2				4	7						2							1				2
124	1503	11121-03001	1B3M5M2PPy	TFSI	[1B3M5M2PPy][TFSI]	1-butyl-3,5-dimethyl-2-pentylpyridinium bis((trifluoromethane)sulfonyl)amide	C18H28F6N2O4S2	333.15	1.44902	train			1														2				4	7						2							1				2
124	1504	11121-03001	1B3M5M2PPy	TFSI	[1B3M5M2PPy][TFSI]	1-butyl-3,5-dimethyl-2-pentylpyridinium bis((trifluoromethane)sulfonyl)amide	C18H28F6N2O4S2	338.15	1.44744	train			1														2				4	7						2							1				2
124	1505	11121-03001	1B3M5M2PPy	TFSI	[1B3M5M2PPy][TFSI]	1-butyl-3,5-dimethyl-2-pentylpyridinium bis((trifluoromethane)sulfonyl)amide	C18H28F6N2O4S2	343.15	1.44588	test			1														2				4	7						2							1				2
124	1506	11122-03001	1H2M3M5MPy	TFSI	[1H2M3M5MPy][TFSI]	1-hexyl-2,3,5-trimethylpyridinium bis((trifluoromethane)sulfonyl)amide	C16H24F6N2O4S2	298.15	1.46466	train			1														2				4	5						2							1				2
124	1507	11122-03001	1H2M3M5MPy	TFSI	[1H2M3M5MPy][TFSI]	1-hexyl-2,3,5-trimethylpyridinium bis((trifluoromethane)sulfonyl)amide	C16H24F6N2O4S2	303.15	1.46311	train			1														2				4	5						2							1				2
124	1508	11122-03001	1H2M3M5MPy	TFSI	[1H2M3M5MPy][TFSI]	1-hexyl-2,3,5-trimethylpyridinium bis((trifluoromethane)sulfonyl)amide	C16H24F6N2O4S2	308.15	1.4615	train			1														2				4	5						2							1				2
124	1509	11122-03001	1H2M3M5MPy	TFSI	[1H2M3M5MPy][TFSI]	1-hexyl-2,3,5-trimethylpyridinium bis((trifluoromethane)sulfonyl)amide	C16H24F6N2O4S2	313.15	1.4599	train			1														2				4	5						2							1				2
124	1510	11122-03001	1H2M3M5MPy	TFSI	[1H2M3M5MPy][TFSI]	1-hexyl-2,3,5-trimethylpyridinium bis((trifluoromethane)sulfonyl)amide	C16H24F6N2O4S2	318.15	1.45826	test			1														2				4	5						2							1				2
124	1511	11122-03001	1H2M3M5MPy	TFSI	[1H2M3M5MPy][TFSI]	1-hexyl-2,3,5-trimethylpyridinium bis((trifluoromethane)sulfonyl)amide	C16H24F6N2O4S2	323.15	1.45671	train			1														2				4	5						2							1				2
124	1512	11122-03001	1H2M3M5MPy	TFSI	[1H2M3M5MPy][TFSI]	1-hexyl-2,3,5-trimethylpyridinium bis((trifluoromethane)sulfonyl)amide	C16H24F6N2O4S2	328.15	1.45514	train			1														2				4	5						2							1				2
124	1513	11122-03001	1H2M3M5MPy	TFSI	[1H2M3M5MPy][TFSI]	1-hexyl-2,3,5-trimethylpyridinium bis((trifluoromethane)sulfonyl)amide	C16H24F6N2O4S2	333.15	1.45357	train			1														2				4	5						2							1				2
124	1514	11122-03001	1H2M3M5MPy	TFSI	[1H2M3M5MPy][TFSI]	1-hexyl-2,3,5-trimethylpyridinium bis((trifluoromethane)sulfonyl)amide	C16H24F6N2O4S2	338.15	1.452	train			1														2				4	5						2							1				2
124	1515	11122-03001	1H2M3M5MPy	TFSI	[1H2M3M5MPy][TFSI]	1-hexyl-2,3,5-trimethylpyridinium bis((trifluoromethane)sulfonyl)amide	C16H24F6N2O4S2	343.15	1.45044	test			1														2				4	5						2							1				2
124	1516	11123-03001	1H3M5M2PPy	TFSI	[1H3M5M2PPy][TFSI]	1-hexyl-3,5-dimethyl-2-pentylpyridinium bis((trifluoromethane)sulfonyl)amide	C20H32F6N2O4S2	298.15	1.46074	train			1														2				4	9						2							1				2
124	1517	11123-03001	1H3M5M2PPy	TFSI	[1H3M5M2PPy][TFSI]	1-hexyl-3,5-dimethyl-2-pentylpyridinium bis((trifluoromethane)sulfonyl)amide	C20H32F6N2O4S2	303.15	1.4591	train			1														2				4	9						2							1				2
124	1518	11123-03001	1H3M5M2PPy	TFSI	[1H3M5M2PPy][TFSI]	1-hexyl-3,5-dimethyl-2-pentylpyridinium bis((trifluoromethane)sulfonyl)amide	C20H32F6N2O4S2	308.15	1.45746	train			1														2				4	9						2							1				2
124	1519	11123-03001	1H3M5M2PPy	TFSI	[1H3M5M2PPy][TFSI]	1-hexyl-3,5-dimethyl-2-pentylpyridinium bis((trifluoromethane)sulfonyl)amide	C20H32F6N2O4S2	313.15	1.45583	train			1														2				4	9						2							1				2
124	1520	11123-03001	1H3M5M2PPy	TFSI	[1H3M5M2PPy][TFSI]	1-hexyl-3,5-dimethyl-2-pentylpyridinium bis((trifluoromethane)sulfonyl)amide	C20H32F6N2O4S2	318.15	1.45417	test			1														2				4	9						2							1				2
124	1521	11123-03001	1H3M5M2PPy	TFSI	[1H3M5M2PPy][TFSI]	1-hexyl-3,5-dimethyl-2-pentylpyridinium bis((trifluoromethane)sulfonyl)amide	C20H32F6N2O4S2	323.15	1.45255	train			1														2				4	9						2							1				2
124	1522	11123-03001	1H3M5M2PPy	TFSI	[1H3M5M2PPy][TFSI]	1-hexyl-3,5-dimethyl-2-pentylpyridinium bis((trifluoromethane)sulfonyl)amide	C20H32F6N2O4S2	328.15	1.45093	train			1														2				4	9						2							1				2
124	1523	11123-03001	1H3M5M2PPy	TFSI	[1H3M5M2PPy][TFSI]	1-hexyl-3,5-dimethyl-2-pentylpyridinium bis((trifluoromethane)sulfonyl)amide	C20H32F6N2O4S2	333.15	1.4493	train			1														2				4	9						2							1				2
124	1524	11123-03001	1H3M5M2PPy	TFSI	[1H3M5M2PPy][TFSI]	1-hexyl-3,5-dimethyl-2-pentylpyridinium bis((trifluoromethane)sulfonyl)amide	C20H32F6N2O4S2	338.15	1.44769	train			1														2				4	9						2							1				2
124	1525	11123-03001	1H3M5M2PPy	TFSI	[1H3M5M2PPy][TFSI]	1-hexyl-3,5-dimethyl-2-pentylpyridinium bis((trifluoromethane)sulfonyl)amide	C20H32F6N2O4S2	343.15	1.44607	test			1														2				4	9						2							1				2
130	1526	14002-03001	S222	TFSI	[S222][TFSI]	tri-ethylsulfonium bis((trifluoromethyl)sulfonyl)imide	C8H15F6NO4S3	283.15	1.43056	train									1								2				3	3													1				2
130	1527	14002-03001	S222	TFSI	[S222][TFSI]	tri-ethylsulfonium bis((trifluoromethyl)sulfonyl)imide	C8H15F6NO4S3	288.15	1.42906	train									1								2				3	3													1				2
130	1528	14002-03001	S222	TFSI	[S222][TFSI]	tri-ethylsulfonium bis((trifluoromethyl)sulfonyl)imide	C8H15F6NO4S3	293.15	1.42765	train									1								2				3	3													1				2
130	1529	14002-03001	S222	TFSI	[S222][TFSI]	tri-ethylsulfonium bis((trifluoromethyl)sulfonyl)imide	C8H15F6NO4S3	298.15	1.42632	train									1								2				3	3													1				2
130	1530	14002-03001	S222	TFSI	[S222][TFSI]	tri-ethylsulfonium bis((trifluoromethyl)sulfonyl)imide	C8H15F6NO4S3	303.15	1.42472	test									1								2				3	3													1				2
130	1531	14002-03001	S222	TFSI	[S222][TFSI]	tri-ethylsulfonium bis((trifluoromethyl)sulfonyl)imide	C8H15F6NO4S3	308.15	1.42325	train									1								2				3	3													1				2
130	1532	14002-03001	S222	TFSI	[S222][TFSI]	tri-ethylsulfonium bis((trifluoromethyl)sulfonyl)imide	C8H15F6NO4S3	313.15	1.42185	train									1								2				3	3													1				2
130	1533	14002-03001	S222	TFSI	[S222][TFSI]	tri-ethylsulfonium bis((trifluoromethyl)sulfonyl)imide	C8H15F6NO4S3	318.15	1.42044	train									1								2				3	3													1				2
130	1534	14002-03001	S222	TFSI	[S222][TFSI]	tri-ethylsulfonium bis((trifluoromethyl)sulfonyl)imide	C8H15F6NO4S3	323.15	1.41906	train									1								2				3	3													1				2
130	1535	14002-03001	S222	TFSI	[S222][TFSI]	tri-ethylsulfonium bis((trifluoromethyl)sulfonyl)imide	C8H15F6NO4S3	328.15	1.41767	test									1								2				3	3													1				2
130	1536	14002-03001	S222	TFSI	[S222][TFSI]	tri-ethylsulfonium bis((trifluoromethyl)sulfonyl)imide	C8H15F6NO4S3	333.15	1.41629	train									1								2				3	3													1				2
130	1537	14002-03001	S222	TFSI	[S222][TFSI]	tri-ethylsulfonium bis((trifluoromethyl)sulfonyl)imide	C8H15F6NO4S3	338.15	1.4149	train									1								2				3	3													1				2
130	1538	14002-03001	S222	TFSI	[S222][TFSI]	tri-ethylsulfonium bis((trifluoromethyl)sulfonyl)imide	C8H15F6NO4S3	343.15	1.41353	train									1								2				3	3													1				2
130	1539	14002-03001	S222	TFSI	[S222][TFSI]	tri-ethylsulfonium bis((trifluoromethyl)sulfonyl)imide	C8H15F6NO4S3	348.15	1.41215	train									1								2				3	3													1				2
130	1540	14002-03001	S222	TFSI	[S222][TFSI]	tri-ethylsulfonium bis((trifluoromethyl)sulfonyl)imide	C8H15F6NO4S3	353.15	1.41077	test									1								2				3	3													1				2
130	1541	14006-03001	S221	TFSI	[S221][TFSI]	methyldiethylsulfonium bis((trifluoromethyl)sulfonyl)imide	C7H13F6NO4S3	283.15	1.42745	train									1								2				3	2													1				2
130	1542	14006-03001	S221	TFSI	[S221][TFSI]	methyldiethylsulfonium bis((trifluoromethyl)sulfonyl)imide	C7H13F6NO4S3	288.15	1.42597	train									1								2				3	2													1				2
130	1543	14006-03001	S221	TFSI	[S221][TFSI]	methyldiethylsulfonium bis((trifluoromethyl)sulfonyl)imide	C7H13F6NO4S3	293.15	1.42452	train									1								2				3	2													1				2
130	1544	14006-03001	S221	TFSI	[S221][TFSI]	methyldiethylsulfonium bis((trifluoromethyl)sulfonyl)imide	C7H13F6NO4S3	298.15	1.42325	train									1								2				3	2													1				2
130	1545	14006-03001	S221	TFSI	[S221][TFSI]	methyldiethylsulfonium bis((trifluoromethyl)sulfonyl)imide	C7H13F6NO4S3	303.15	1.42168	test									1								2				3	2													1				2
130	1546	14006-03001	S221	TFSI	[S221][TFSI]	methyldiethylsulfonium bis((trifluoromethyl)sulfonyl)imide	C7H13F6NO4S3	308.15	1.42026	train									1								2				3	2													1				2
130	1547	14006-03001	S221	TFSI	[S221][TFSI]	methyldiethylsulfonium bis((trifluoromethyl)sulfonyl)imide	C7H13F6NO4S3	313.15	1.41886	train									1								2				3	2													1				2
130	1548	14006-03001	S221	TFSI	[S221][TFSI]	methyldiethylsulfonium bis((trifluoromethyl)sulfonyl)imide	C7H13F6NO4S3	318.15	1.41744	train									1								2				3	2													1				2
130	1549	14006-03001	S221	TFSI	[S221][TFSI]	methyldiethylsulfonium bis((trifluoromethyl)sulfonyl)imide	C7H13F6NO4S3	323.15	1.41606	train									1								2				3	2													1				2
130	1550	14006-03001	S221	TFSI	[S221][TFSI]	methyldiethylsulfonium bis((trifluoromethyl)sulfonyl)imide	C7H13F6NO4S3	328.15	1.41468	test									1								2				3	2													1				2
130	1551	14006-03001	S221	TFSI	[S221][TFSI]	methyldiethylsulfonium bis((trifluoromethyl)sulfonyl)imide	C7H13F6NO4S3	333.15	1.41331	train									1								2				3	2													1				2
130	1552	14006-03001	S221	TFSI	[S221][TFSI]	methyldiethylsulfonium bis((trifluoromethyl)sulfonyl)imide	C7H13F6NO4S3	338.15	1.41195	train									1								2				3	2													1				2
130	1553	14006-03001	S221	TFSI	[S221][TFSI]	methyldiethylsulfonium bis((trifluoromethyl)sulfonyl)imide	C7H13F6NO4S3	343.15	1.41058	train									1								2				3	2													1				2
130	1554	14006-03001	S221	TFSI	[S221][TFSI]	methyldiethylsulfonium bis((trifluoromethyl)sulfonyl)imide	C7H13F6NO4S3	348.15	1.40925	train									1								2				3	2													1				2
130	1555	14006-03001	S221	TFSI	[S221][TFSI]	methyldiethylsulfonium bis((trifluoromethyl)sulfonyl)imide	C7H13F6NO4S3	353.15	1.40793	test									1								2				3	2													1				2
131	1556	15005-03001	N1113	TFSI	[N1113][TFSI]	trimethylpropylammonium bis((trifluoromethyl)sulfonyl)imide	C8H16F6N2O4S2	283.15	1.4089	train					1												2				4	2													1				2
131	1557	15005-03001	N1113	TFSI	[N1113][TFSI]	trimethylpropylammonium bis((trifluoromethyl)sulfonyl)imide	C8H16F6N2O4S2	288.15	1.40759	train					1												2				4	2													1				2
131	1558	15005-03001	N1113	TFSI	[N1113][TFSI]	trimethylpropylammonium bis((trifluoromethyl)sulfonyl)imide	C8H16F6N2O4S2	293.15	1.40624	train					1												2				4	2													1				2
131	1559	15005-03001	N1113	TFSI	[N1113][TFSI]	trimethylpropylammonium bis((trifluoromethyl)sulfonyl)imide	C8H16F6N2O4S2	298.15	1.40485	train					1												2				4	2													1				2
131	1560	15005-03001	N1113	TFSI	[N1113][TFSI]	trimethylpropylammonium bis((trifluoromethyl)sulfonyl)imide	C8H16F6N2O4S2	303.15	1.40355	test					1												2				4	2													1				2
131	1561	15005-03001	N1113	TFSI	[N1113][TFSI]	trimethylpropylammonium bis((trifluoromethyl)sulfonyl)imide	C8H16F6N2O4S2	308.15	1.40223	train					1												2				4	2													1				2
131	1562	15005-03001	N1113	TFSI	[N1113][TFSI]	trimethylpropylammonium bis((trifluoromethyl)sulfonyl)imide	C8H16F6N2O4S2	313.15	1.40091	train					1												2				4	2													1				2
131	1563	15005-03001	N1113	TFSI	[N1113][TFSI]	trimethylpropylammonium bis((trifluoromethyl)sulfonyl)imide	C8H16F6N2O4S2	318.15	1.39956	train					1												2				4	2													1				2
131	1564	15005-03001	N1113	TFSI	[N1113][TFSI]	trimethylpropylammonium bis((trifluoromethyl)sulfonyl)imide	C8H16F6N2O4S2	323.15	1.3983	train					1												2				4	2													1				2
131	1565	15005-03001	N1113	TFSI	[N1113][TFSI]	trimethylpropylammonium bis((trifluoromethyl)sulfonyl)imide	C8H16F6N2O4S2	328.15	1.39698	test					1												2				4	2													1				2
131	1566	15005-03001	N1113	TFSI	[N1113][TFSI]	trimethylpropylammonium bis((trifluoromethyl)sulfonyl)imide	C8H16F6N2O4S2	333.15	1.39569	train					1												2				4	2													1				2
131	1567	15005-03001	N1113	TFSI	[N1113][TFSI]	trimethylpropylammonium bis((trifluoromethyl)sulfonyl)imide	C8H16F6N2O4S2	338.15	1.39438	train					1												2				4	2													1				2
131	1568	15005-03001	N1113	TFSI	[N1113][TFSI]	trimethylpropylammonium bis((trifluoromethyl)sulfonyl)imide	C8H16F6N2O4S2	343.15	1.39311	train					1												2				4	2													1				2
131	1569	15005-03001	N1113	TFSI	[N1113][TFSI]	trimethylpropylammonium bis((trifluoromethyl)sulfonyl)imide	C8H16F6N2O4S2	348.15	1.39184	train					1												2				4	2													1				2
131	1570	15005-03001	N1113	TFSI	[N1113][TFSI]	trimethylpropylammonium bis((trifluoromethyl)sulfonyl)imide	C8H16F6N2O4S2	353.15	1.39056	test					1												2				4	2													1				2
3	1571	15013-03001	N1114	TFSI	[N1114][TFSI]	trimethyl-butylammonium bis((trifluoromethyl)sulfonyl)imide	C9H18F6N2O4S2	298	1.4277	train					1												2				4	3													1				2
130	1572	15013-03001	N1114	TFSI	[N1114][TFSI]	trimethyl-butylammonium bis((trifluoromethyl)sulfonyl)imide	C9H18F6N2O4S2	283.15	1.4122	train					1												2				4	3													1				2
130	1573	15013-03001	N1114	TFSI	[N1114][TFSI]	trimethyl-butylammonium bis((trifluoromethyl)sulfonyl)imide	C9H18F6N2O4S2	288.15	1.41083	train					1												2				4	3													1				2
130	1574	15013-03001	N1114	TFSI	[N1114][TFSI]	trimethyl-butylammonium bis((trifluoromethyl)sulfonyl)imide	C9H18F6N2O4S2	293.15	1.40945	train					1												2				4	3													1				2
130	1575	15013-03001	N1114	TFSI	[N1114][TFSI]	trimethyl-butylammonium bis((trifluoromethyl)sulfonyl)imide	C9H18F6N2O4S2	298.15	1.40818	test					1												2				4	3													1				2
130	1576	15013-03001	N1114	TFSI	[N1114][TFSI]	trimethyl-butylammonium bis((trifluoromethyl)sulfonyl)imide	C9H18F6N2O4S2	303.15	1.40676	train					1												2				4	3													1				2
130	1577	15013-03001	N1114	TFSI	[N1114][TFSI]	trimethyl-butylammonium bis((trifluoromethyl)sulfonyl)imide	C9H18F6N2O4S2	308.15	1.40538	train					1												2				4	3													1				2
130	1578	15013-03001	N1114	TFSI	[N1114][TFSI]	trimethyl-butylammonium bis((trifluoromethyl)sulfonyl)imide	C9H18F6N2O4S2	313.15	1.40405	train					1												2				4	3													1				2
130	1579	15013-03001	N1114	TFSI	[N1114][TFSI]	trimethyl-butylammonium bis((trifluoromethyl)sulfonyl)imide	C9H18F6N2O4S2	318.15	1.40273	train					1												2				4	3													1				2
130	1580	15013-03001	N1114	TFSI	[N1114][TFSI]	trimethyl-butylammonium bis((trifluoromethyl)sulfonyl)imide	C9H18F6N2O4S2	323.15	1.40142	test					1												2				4	3													1				2
130	1581	15013-03001	N1114	TFSI	[N1114][TFSI]	trimethyl-butylammonium bis((trifluoromethyl)sulfonyl)imide	C9H18F6N2O4S2	328.15	1.40006	train					1												2				4	3													1				2
130	1582	15013-03001	N1114	TFSI	[N1114][TFSI]	trimethyl-butylammonium bis((trifluoromethyl)sulfonyl)imide	C9H18F6N2O4S2	333.15	1.39877	train					1												2				4	3													1				2
130	1583	15013-03001	N1114	TFSI	[N1114][TFSI]	trimethyl-butylammonium bis((trifluoromethyl)sulfonyl)imide	C9H18F6N2O4S2	338.15	1.39747	train					1												2				4	3													1				2
130	1584	15013-03001	N1114	TFSI	[N1114][TFSI]	trimethyl-butylammonium bis((trifluoromethyl)sulfonyl)imide	C9H18F6N2O4S2	343.15	1.39616	train					1												2				4	3													1				2
130	1585	15013-03001	N1114	TFSI	[N1114][TFSI]	trimethyl-butylammonium bis((trifluoromethyl)sulfonyl)imide	C9H18F6N2O4S2	348.15	1.39486	test					1												2				4	3													1				2
130	1586	15013-03001	N1114	TFSI	[N1114][TFSI]	trimethyl-butylammonium bis((trifluoromethyl)sulfonyl)imide	C9H18F6N2O4S2	353.15	1.39358	train					1												2				4	3													1				2
131	1587	15014-03001	N1222	TFSI	[N1222][TFSI]	triethyl-methylammonium bis((trifluoromethyl)sulfonyl)imide	C9H18F6N2O4S2	283.15	1.41224	train					1												2				4	3													1				2
131	1588	15014-03001	N1222	TFSI	[N1222][TFSI]	triethyl-methylammonium bis((trifluoromethyl)sulfonyl)imide	C9H18F6N2O4S2	288.15	1.41092	train					1												2				4	3													1				2
131	1589	15014-03001	N1222	TFSI	[N1222][TFSI]	triethyl-methylammonium bis((trifluoromethyl)sulfonyl)imide	C9H18F6N2O4S2	293.15	1.40958	train					1												2				4	3													1				2
131	1590	15014-03001	N1222	TFSI	[N1222][TFSI]	triethyl-methylammonium bis((trifluoromethyl)sulfonyl)imide	C9H18F6N2O4S2	298.15	1.40825	test					1												2				4	3													1				2
131	1591	15014-03001	N1222	TFSI	[N1222][TFSI]	triethyl-methylammonium bis((trifluoromethyl)sulfonyl)imide	C9H18F6N2O4S2	303.15	1.40695	train					1												2				4	3													1				2
131	1592	15014-03001	N1222	TFSI	[N1222][TFSI]	triethyl-methylammonium bis((trifluoromethyl)sulfonyl)imide	C9H18F6N2O4S2	308.15	1.40556	train					1												2				4	3													1				2
131	1593	15014-03001	N1222	TFSI	[N1222][TFSI]	triethyl-methylammonium bis((trifluoromethyl)sulfonyl)imide	C9H18F6N2O4S2	313.15	1.4042	train					1												2				4	3													1				2
131	1594	15014-03001	N1222	TFSI	[N1222][TFSI]	triethyl-methylammonium bis((trifluoromethyl)sulfonyl)imide	C9H18F6N2O4S2	318.15	1.40288	train					1												2				4	3													1				2
131	1595	15014-03001	N1222	TFSI	[N1222][TFSI]	triethyl-methylammonium bis((trifluoromethyl)sulfonyl)imide	C9H18F6N2O4S2	323.15	1.40154	test					1												2				4	3													1				2
131	1596	15014-03001	N1222	TFSI	[N1222][TFSI]	triethyl-methylammonium bis((trifluoromethyl)sulfonyl)imide	C9H18F6N2O4S2	328.15	1.40023	train					1												2				4	3													1				2
131	1597	15014-03001	N1222	TFSI	[N1222][TFSI]	triethyl-methylammonium bis((trifluoromethyl)sulfonyl)imide	C9H18F6N2O4S2	333.15	1.3989	train					1												2				4	3													1				2
131	1598	15014-03001	N1222	TFSI	[N1222][TFSI]	triethyl-methylammonium bis((trifluoromethyl)sulfonyl)imide	C9H18F6N2O4S2	338.15	1.39762	train					1												2				4	3													1				2
131	1599	15014-03001	N1222	TFSI	[N1222][TFSI]	triethyl-methylammonium bis((trifluoromethyl)sulfonyl)imide	C9H18F6N2O4S2	343.15	1.3963	train					1												2				4	3													1				2
131	1600	15014-03001	N1222	TFSI	[N1222][TFSI]	triethyl-methylammonium bis((trifluoromethyl)sulfonyl)imide	C9H18F6N2O4S2	348.15	1.39503	test					1												2				4	3													1				2
131	1601	15014-03001	N1222	TFSI	[N1222][TFSI]	triethyl-methylammonium bis((trifluoromethyl)sulfonyl)imide	C9H18F6N2O4S2	353.15	1.39373	train					1												2				4	3													1				2
132	1602	15015-02001	N112,1O2	BF4	[N112,1O2][BF4]	ethoxymethylene-dimethyl-ethylammonium tetrafluoroborate	C7H18NOBF4	298.15	1.398	train					1					1											4	3							1
132	1603	15015-03001	N112,1O2	TFSI	[N112,1O2][TFSI]	ethoxymethylene-dimethyl-ethylammonium bis(trifluoromethanesulfonyl)imide)	C9H18F6N2O5S2	298.15	1.4104	train					1												2				4	3							1						1				2
131	1604	15021-03001	N1116	TFSI	[N1116][TFSI]	trimethyl-hexylammonium bis((trifluoromethyl)sulfonyl)imide	C11H22F6N2O4S2	283.15	1.4172	train					1												2				4	5													1				2
131	1605	15021-03001	N1116	TFSI	[N1116][TFSI]	trimethyl-hexylammonium bis((trifluoromethyl)sulfonyl)imide	C11H22F6N2O4S2	288.15	1.41583	test					1												2				4	5													1				2
131	1606	15021-03001	N1116	TFSI	[N1116][TFSI]	trimethyl-hexylammonium bis((trifluoromethyl)sulfonyl)imide	C11H22F6N2O4S2	293.15	1.41446	train					1												2				4	5													1				2
131	1607	15021-03001	N1116	TFSI	[N1116][TFSI]	trimethyl-hexylammonium bis((trifluoromethyl)sulfonyl)imide	C11H22F6N2O4S2	298.15	1.41305	train					1												2				4	5													1				2
131	1608	15021-03001	N1116	TFSI	[N1116][TFSI]	trimethyl-hexylammonium bis((trifluoromethyl)sulfonyl)imide	C11H22F6N2O4S2	303.15	1.41171	train					1												2				4	5													1				2
131	1609	15021-03001	N1116	TFSI	[N1116][TFSI]	trimethyl-hexylammonium bis((trifluoromethyl)sulfonyl)imide	C11H22F6N2O4S2	308.15	1.41035	train					1												2				4	5													1				2
131	1610	15021-03001	N1116	TFSI	[N1116][TFSI]	trimethyl-hexylammonium bis((trifluoromethyl)sulfonyl)imide	C11H22F6N2O4S2	313.15	1.40897	test					1												2				4	5													1				2
131	1611	15021-03001	N1116	TFSI	[N1116][TFSI]	trimethyl-hexylammonium bis((trifluoromethyl)sulfonyl)imide	C11H22F6N2O4S2	318.15	1.40764	train					1												2				4	5													1				2
131	1612	15021-03001	N1116	TFSI	[N1116][TFSI]	trimethyl-hexylammonium bis((trifluoromethyl)sulfonyl)imide	C11H22F6N2O4S2	323.15	1.4063	train					1												2				4	5													1				2
131	1613	15021-03001	N1116	TFSI	[N1116][TFSI]	trimethyl-hexylammonium bis((trifluoromethyl)sulfonyl)imide	C11H22F6N2O4S2	328.15	1.40491	train					1												2				4	5													1				2
131	1614	15021-03001	N1116	TFSI	[N1116][TFSI]	trimethyl-hexylammonium bis((trifluoromethyl)sulfonyl)imide	C11H22F6N2O4S2	333.15	1.4036	train					1												2				4	5													1				2
131	1615	15021-03001	N1116	TFSI	[N1116][TFSI]	trimethyl-hexylammonium bis((trifluoromethyl)sulfonyl)imide	C11H22F6N2O4S2	338.15	1.40225	test					1												2				4	5													1				2
131	1616	15021-03001	N1116	TFSI	[N1116][TFSI]	trimethyl-hexylammonium bis((trifluoromethyl)sulfonyl)imide	C11H22F6N2O4S2	343.15	1.40092	train					1												2				4	5													1				2
131	1617	15021-03001	N1116	TFSI	[N1116][TFSI]	trimethyl-hexylammonium bis((trifluoromethyl)sulfonyl)imide	C11H22F6N2O4S2	348.15	1.3996	train					1												2				4	5													1				2
131	1618	15021-03001	N1116	TFSI	[N1116][TFSI]	trimethyl-hexylammonium bis((trifluoromethyl)sulfonyl)imide	C11H22F6N2O4S2	353.15	1.39828	train					1												2				4	5													1				2
131	1619	15025-03001	N8111	TFSI	[N8111][TFSI]	trimethyl-octylammonium bis((trifluoromethyl)sulfonyl)imide	C13H26F6N2O4S2	283.15	1.42162	train					1												2				4	7													1				2
131	1620	15025-03001	N8111	TFSI	[N8111][TFSI]	trimethyl-octylammonium bis((trifluoromethyl)sulfonyl)imide	C13H26F6N2O4S2	288.15	1.42024	test					1												2				4	7													1				2
131	1621	15025-03001	N8111	TFSI	[N8111][TFSI]	trimethyl-octylammonium bis((trifluoromethyl)sulfonyl)imide	C13H26F6N2O4S2	293.15	1.41885	train					1												2				4	7													1				2
131	1622	15025-03001	N8111	TFSI	[N8111][TFSI]	trimethyl-octylammonium bis((trifluoromethyl)sulfonyl)imide	C13H26F6N2O4S2	298.15	1.4174	train					1												2				4	7													1				2
131	1623	15025-03001	N8111	TFSI	[N8111][TFSI]	trimethyl-octylammonium bis((trifluoromethyl)sulfonyl)imide	C13H26F6N2O4S2	303.15	1.41601	train					1												2				4	7													1				2
131	1624	15025-03001	N8111	TFSI	[N8111][TFSI]	trimethyl-octylammonium bis((trifluoromethyl)sulfonyl)imide	C13H26F6N2O4S2	308.15	1.41462	train					1												2				4	7													1				2
131	1625	15025-03001	N8111	TFSI	[N8111][TFSI]	trimethyl-octylammonium bis((trifluoromethyl)sulfonyl)imide	C13H26F6N2O4S2	313.15	1.41318	test					1												2				4	7													1				2
131	1626	15025-03001	N8111	TFSI	[N8111][TFSI]	trimethyl-octylammonium bis((trifluoromethyl)sulfonyl)imide	C13H26F6N2O4S2	318.15	1.4118	train					1												2				4	7													1				2
131	1627	15025-03001	N8111	TFSI	[N8111][TFSI]	trimethyl-octylammonium bis((trifluoromethyl)sulfonyl)imide	C13H26F6N2O4S2	323.15	1.41042	train					1												2				4	7													1				2
131	1628	15025-03001	N8111	TFSI	[N8111][TFSI]	trimethyl-octylammonium bis((trifluoromethyl)sulfonyl)imide	C13H26F6N2O4S2	328.15	1.40902	train					1												2				4	7													1				2
131	1629	15025-03001	N8111	TFSI	[N8111][TFSI]	trimethyl-octylammonium bis((trifluoromethyl)sulfonyl)imide	C13H26F6N2O4S2	333.15	1.40766	train					1												2				4	7													1				2
131	1630	15025-03001	N8111	TFSI	[N8111][TFSI]	trimethyl-octylammonium bis((trifluoromethyl)sulfonyl)imide	C13H26F6N2O4S2	338.15	1.4063	test					1												2				4	7													1				2
131	1631	15025-03001	N8111	TFSI	[N8111][TFSI]	trimethyl-octylammonium bis((trifluoromethyl)sulfonyl)imide	C13H26F6N2O4S2	343.15	1.40491	train					1												2				4	7													1				2
131	1632	15025-03001	N8111	TFSI	[N8111][TFSI]	trimethyl-octylammonium bis((trifluoromethyl)sulfonyl)imide	C13H26F6N2O4S2	348.15	1.40357	train					1												2				4	7													1				2
131	1633	15025-03001	N8111	TFSI	[N8111][TFSI]	trimethyl-octylammonium bis((trifluoromethyl)sulfonyl)imide	C13H26F6N2O4S2	353.15	1.40223	train					1												2				4	7													1				2
133	1634	15029-03001	N7222	TFSI	[N7222][TFSI]	triethylheptylammonium bis[(trifluoromethyl)sulfonyl]amide	C15H30F6N2O4S2	298.15	1.42708	train					1												2				4	9													1				2
133	1635	15029-03001	N7222	TFSI	[N7222][TFSI]	triethylhexylammonium bis[(trifluoromethyl)sulfonyl]amide	C14H28F6N2O4S2	298.15	1.42599	test					1												2				4	9													1				2
133	1636	15029-03001	N7222	TFSI	[N7222][TFSI]	triethyloctylammonium bis[(trifluoromethyl)sulfonyl]amide	C16H32F6N2O4S2	298.15	1.42871	train					1												2				4	9													1				2
2	1637	15075-03009	N444H	NO3	[N444H][NO3]	tri-n-butylammonium bis((trifluoromethyl)sulfonyl)imide	C14H28F6N3O4S2	298.15	1.4627	train					1										1						3	9										3
2	1638	15077-15003	NHH33	SCN	[NHH33][SCN]	dipropylammonium thiocyanate	C7H16N2S	298.15	1.5062	train					1											1					2	4										2	1
134	1639	15082-04021	NH222	HSO4	[NH222][HSO4]	triethylammonium hydrogensulfate	C6H17NSO4	298.15	1.516	train					1												1				3	3							1		1	1
134	1640	15082-06003	NH222	OAc	[NH222][OAc]	triethylammonium acetate	C8H19NO2	298.15	1.501	test					1																4	3							1			1					1
135	1641	15084-03009	NHHH2	NO3	[NHHH2][NO3]	ethylammonium nitrate	C2H8N2O3	298.15	1.4524	train					1										1						1	1										3
2	1642	15084-03009	NHHH2	NO3	[NHHH2][NO3]	ethylammonium nitrate	C2H8N2O3	298.15	1.4537	train					1										1						1	1										3
135	1643	15084-04021	NHHH2	HSO4	[NHHH2][HSO4]	ethylammonium hydrosulfate	C2H9NO4S	298.15	1.4489	train					1												1				2	1							1	2	1	3
136	1644	15084-06003	NHHH2	OAc	[NHHH2][OAc]	ethylammonium acetate	C4H11NO2	298.15	1.4345	train					1																2	1								1		3					1
135	1645	15084-06005	NHHH2	HCO2	[NHHH2][HCO2]	ethylammonium formate	C3H9NO2	298.15	1.4344	test					1																1	1							1			4					1
135	1646	15084-06007	NHHH2	DL-lactate	[NHHH2][DL-lactate]	ethylammonium dl-lactate	C5H13NO3	298.15	1.4581	train					1																2	1	1						1	1	1	3					1
135	1647	15084-06032	NHHH2	CH3CH2CO2	[NHHH2][CH3CH2CO2]	ethylammonium propionate	C5H13NO2	298.15	1.4358	train					1																2	2							1	1		3					1
135	1648	15084-06033	NHHH2	CH3(CH2)2CO2	[NHHH2][CH3(CH2)2CO2]	ethylammonium butyrate	C6H15NO2	298.15	1.4398	train					1																2	3							1	1		3					1
135	1649	15084-06034	NHHH2	CH2(OH)CO2	[NHHH2][CH2(OH)CO2]	ethylammonium glycolate	C4H11NO3	298.15	1.4692	train					1																1	2							1	1	1	3					1
135	1650	15086-03009	NHHH(CH2)2OH	NO3	[NHHH(CH2)2OH][NO3]	2-hydroxyethylammonium nitrate	C2H8N2O4	298.15	1.44	test					1										1							2									1	3
135	1651	15086-06003	NHHH(CH2)2OH	OAc	[NHHH(CH2)2OH][OAc]	2-hydroxyethylammonium acetate	C4H11NO3	298.15	1.469	train					1																1	2							1		1	3					1
137	1652	15086-06003	NHHH(CH2)2OH	OAc	[NHHH(CH2)2OH][OAc]	2-hydroxyethylammonium acetate	C4H11NO3	298.15	1.46676	train					1																1	2							1		1	3					1
135	1653	15086-06005	NHHH(CH2)2OH	HCO2	[NHHH(CH2)2OH][HCO2]	2-hydroxyethylammonium formate	C3H9NO3	298.15	1.4705	train					1																	2							1		1	4					1
137	1654	15086-06006	NHHH(CH2)3OH	HCO3	[NHHH(CH2)2OH][HCO3]	3-hydroxyethylammonium formate	C3H9NO4	298.15	1.46901	train					1																	2							1		1	4					1
135	1655	15086-06007	NHHH(CH2)2OH	DL-lactate	[NHHH(CH2)2OH][DL-lactate]	2-hydroxyethylammonium dl-lactate	C5H13NO4	298.15	1.4702	test					1																1	2	1						1	1	2	3					1
137	1656	15086-06007	NHHH(CH2)2OH	DL-lactate	[NHHH(CH2)2OH][DL-lactate]	2-hydroxyethylammonium dl-lactate	C5H13NO4	298.15	1.46756	train					1																1	2	1						1	1	2	3					1
137	1657	15086-06032	NHHH(CH2)2OH	C2H5COO	[NHHH(CH2)2OH][C2H5COO]	2-hydroxyethanaminium propionate	C5H13NO3	298.15	1.45891	train					1																1	3							1	1	1	3					1
138	1658	15094-06008	N111,2OH	L-lactate	[N111,2OH][L-lactate]	2-hydroxyethyltrimethylammonium l-lactate	C8H19NO4	293.15	1.48146	train					1																4	2	1						1		2						1
138	1659	15094-06008	N111,2OH	L-lactate	[N111,2OH][L-lactate]	2-hydroxyethyltrimethylammonium l-lactate	C8H19NO4	298.15	1.48056	train					1																4	2	1						1		2						1
138	1660	15094-06008	N111,2OH	L-lactate	[N111,2OH][L-lactate]	2-hydroxyethyltrimethylammonium l-lactate	C8H19NO4	303.15	1.47931	test					1																4	2	1						1		2						1
138	1661	15094-06008	N111,2OH	L-lactate	[N111,2OH][L-lactate]	2-hydroxyethyltrimethylammonium l-lactate	C8H19NO4	308.15	1.47808	train					1																4	2	1						1		2						1
138	1662	15094-06008	N111,2OH	L-lactate	[N111,2OH][L-lactate]	2-hydroxyethyltrimethylammonium l-lactate	C8H19NO4	313.15	1.47676	train					1																4	2	1						1		2						1
138	1663	15094-06008	N111,2OH	L-lactate	[N111,2OH][L-lactate]	2-hydroxyethyltrimethylammonium l-lactate	C8H19NO4	318.15	1.47544	train					1																4	2	1						1		2						1
138	1664	15094-06008	N111,2OH	L-lactate	[N111,2OH][L-lactate]	2-hydroxyethyltrimethylammonium l-lactate	C8H19NO4	323.15	1.47418	train					1																4	2	1						1		2						1
139	1665	15094-06009	N111,2OH	Gly	[N111,2OH][Gly]	2-hydroxy-n,n,n-trimethylethanaminium glycinate	C7H18N2O3	293.15	1.5238	test					1																3	3							1		1					1	1
139	1666	15094-06009	N111,2OH	Gly	[N111,2OH][Gly]	2-hydroxy-n,n,n-trimethylethanaminium glycinate	C7H18N2O3	298.15	1.5224	train					1																3	3							1		1					1	1
139	1667	15094-06009	N111,2OH	Gly	[N111,2OH][Gly]	2-hydroxy-n,n,n-trimethylethanaminium glycinate	C7H18N2O3	303.15	1.5213	train					1																3	3							1		1					1	1
139	1668	15094-06009	N111,2OH	Gly	[N111,2OH][Gly]	2-hydroxy-n,n,n-trimethylethanaminium glycinate	C7H18N2O3	308.15	1.5204	train					1																3	3							1		1					1	1
139	1669	15094-06009	N111,2OH	Gly	[N111,2OH][Gly]	2-hydroxy-n,n,n-trimethylethanaminium glycinate	C7H18N2O3	313.15	1.5194	train					1																3	3							1		1					1	1
139	1670	15094-06009	N111,2OH	Gly	[N111,2OH][Gly]	2-hydroxy-n,n,n-trimethylethanaminium glycinate	C7H18N2O3	318.15	1.5182	test					1																3	3							1		1					1	1
139	1671	15094-06009	N111,2OH	Gly	[N111,2OH][Gly]	2-hydroxy-n,n,n-trimethylethanaminium glycinate	C7H18N2O3	323.15	1.5171	train					1																3	3							1		1					1	1
139	1672	15094-06009	N111,2OH	Gly	[N111,2OH][Gly]	2-hydroxy-n,n,n-trimethylethanaminium glycinate	C7H18N2O3	328.15	1.5158	train					1																3	3							1		1					1	1
139	1673	15094-06009	N111,2OH	Gly	[N111,2OH][Gly]	2-hydroxy-n,n,n-trimethylethanaminium glycinate	C7H18N2O3	333.15	1.5148	train					1																3	3							1		1					1	1
139	1674	15094-06009	N111,2OH	Gly	[N111,2OH][Gly]	2-hydroxy-n,n,n-trimethylethanaminium glycinate	C7H18N2O3	338.15	1.5137	train					1																3	3							1		1					1	1
139	1675	15094-06009	N111,2OH	Gly	[N111,2OH][Gly]	2-hydroxy-n,n,n-trimethylethanaminium glycinate	C7H18N2O3	343.15	1.5125	test					1																3	3							1		1					1	1
139	1676	15094-06010	N111,2OH	Ala	[N111,2OH][Ala]	2-hydroxy-n,n,n-trimethylethanaminium .beta.-alaninate	C8H20N2O3	293.15	1.5322	train					1																3	4							1		1					1	1
139	1677	15094-06010	N111,2OH	Ala	[N111,2OH][Ala]	2-hydroxy-n,n,n-trimethylethanaminium .beta.-alaninate	C8H20N2O3	298.15	1.5313	train					1																3	4							1		1					1	1
139	1678	15094-06010	N111,2OH	Ala	[N111,2OH][Ala]	2-hydroxy-n,n,n-trimethylethanaminium .beta.-alaninate	C8H20N2O3	303.15	1.5306	train					1																3	4							1		1					1	1
139	1679	15094-06010	N111,2OH	Ala	[N111,2OH][Ala]	2-hydroxy-n,n,n-trimethylethanaminium .beta.-alaninate	C8H20N2O3	308.15	1.5294	train					1																3	4							1		1					1	1
139	1680	15094-06010	N111,2OH	Ala	[N111,2OH][Ala]	2-hydroxy-n,n,n-trimethylethanaminium .beta.-alaninate	C8H20N2O3	313.15	1.5285	test					1																3	4							1		1					1	1
139	1681	15094-06010	N111,2OH	Ala	[N111,2OH][Ala]	2-hydroxy-n,n,n-trimethylethanaminium .beta.-alaninate	C8H20N2O3	318.15	1.5277	train					1																3	4							1		1					1	1
139	1682	15094-06010	N111,2OH	Ala	[N111,2OH][Ala]	2-hydroxy-n,n,n-trimethylethanaminium .beta.-alaninate	C8H20N2O3	323.15	1.5266	train					1																3	4							1		1					1	1
139	1683	15094-06010	N111,2OH	Ala	[N111,2OH][Ala]	2-hydroxy-n,n,n-trimethylethanaminium .beta.-alaninate	C8H20N2O3	328.15	1.526	train					1																3	4							1		1					1	1
139	1684	15094-06010	N111,2OH	Ala	[N111,2OH][Ala]	2-hydroxy-n,n,n-trimethylethanaminium .beta.-alaninate	C8H20N2O3	333.15	1.5249	train					1																3	4							1		1					1	1
139	1685	15094-06010	N111,2OH	Ala	[N111,2OH][Ala]	2-hydroxy-n,n,n-trimethylethanaminium .beta.-alaninate	C8H20N2O3	338.15	1.5238	test					1																3	4							1		1					1	1
139	1686	15094-06010	N111,2OH	Ala	[N111,2OH][Ala]	2-hydroxy-n,n,n-trimethylethanaminium .beta.-alaninate	C8H20N2O3	343.15	1.5225	train					1																3	4							1		1					1	1
139	1687	15094-06010	N111,2OH	Ala	[N111,2OH][Ala]	2-hydroxy-n,n,n-trimethylethanaminium l-alaninate	C8H20N2O3	293.15	1.5146	train					1																3	4							1		1					1	1
139	1688	15094-06010	N111,2OH	Ala	[N111,2OH][Ala]	2-hydroxy-n,n,n-trimethylethanaminium l-alaninate	C8H20N2O3	298.15	1.514	train					1																3	4							1		1					1	1
139	1689	15094-06010	N111,2OH	Ala	[N111,2OH][Ala]	2-hydroxy-n,n,n-trimethylethanaminium l-alaninate	C8H20N2O3	303.15	1.5127	train					1																3	4							1		1					1	1
139	1690	15094-06010	N111,2OH	Ala	[N111,2OH][Ala]	2-hydroxy-n,n,n-trimethylethanaminium l-alaninate	C8H20N2O3	308.15	1.5118	test					1																3	4							1		1					1	1
139	1691	15094-06010	N111,2OH	Ala	[N111,2OH][Ala]	2-hydroxy-n,n,n-trimethylethanaminium l-alaninate	C8H20N2O3	313.15	1.5105	train					1																3	4							1		1					1	1
139	1692	15094-06010	N111,2OH	Ala	[N111,2OH][Ala]	2-hydroxy-n,n,n-trimethylethanaminium l-alaninate	C8H20N2O3	318.15	1.5094	train					1																3	4							1		1					1	1
139	1693	15094-06010	N111,2OH	Ala	[N111,2OH][Ala]	2-hydroxy-n,n,n-trimethylethanaminium l-alaninate	C8H20N2O3	323.15	1.5084	train					1																3	4							1		1					1	1
139	1694	15094-06010	N111,2OH	Ala	[N111,2OH][Ala]	2-hydroxy-n,n,n-trimethylethanaminium l-alaninate	C8H20N2O3	328.15	1.5072	train					1																3	4							1		1					1	1
139	1695	15094-06010	N111,2OH	Ala	[N111,2OH][Ala]	2-hydroxy-n,n,n-trimethylethanaminium l-alaninate	C8H20N2O3	333.15	1.506	test					1																3	4							1		1					1	1
139	1696	15094-06010	N111,2OH	Ala	[N111,2OH][Ala]	2-hydroxy-n,n,n-trimethylethanaminium l-alaninate	C8H20N2O3	338.15	1.5052	train					1																3	4							1		1					1	1
139	1697	15094-06010	N111,2OH	Ala	[N111,2OH][Ala]	2-hydroxy-n,n,n-trimethylethanaminium l-alaninate	C8H20N2O3	343.15	1.5041	train					1																3	4							1		1					1	1
139	1698	15094-06014	N111,2OH	Ser	[N111,2OH][Ser]	2-hydroxy-n,n,n-trimethylethanaminium l-serinate	C8H20N2O4	293.15	1.5447	train					1																3	3	1						1		1					1	1
139	1699	15094-06014	N111,2OH	Ser	[N111,2OH][Ser]	2-hydroxy-n,n,n-trimethylethanaminium l-serinate	C8H20N2O4	298.15	1.5429	train					1																3	3	1						1		1					1	1
139	1700	15094-06014	N111,2OH	Ser	[N111,2OH][Ser]	2-hydroxy-n,n,n-trimethylethanaminium l-serinate	C8H20N2O4	303.15	1.5416	test					1																3	3	1						1		1					1	1
139	1701	15094-06014	N111,2OH	Ser	[N111,2OH][Ser]	2-hydroxy-n,n,n-trimethylethanaminium l-serinate	C8H20N2O4	308.15	1.5408	train					1																3	3	1						1		1					1	1
139	1702	15094-06014	N111,2OH	Ser	[N111,2OH][Ser]	2-hydroxy-n,n,n-trimethylethanaminium l-serinate	C8H20N2O4	313.15	1.5397	train					1																3	3	1						1		1					1	1
139	1703	15094-06014	N111,2OH	Ser	[N111,2OH][Ser]	2-hydroxy-n,n,n-trimethylethanaminium l-serinate	C8H20N2O4	318.15	1.5388	train					1																3	3	1						1		1					1	1
139	1704	15094-06014	N111,2OH	Ser	[N111,2OH][Ser]	2-hydroxy-n,n,n-trimethylethanaminium l-serinate	C8H20N2O4	323.15	1.5382	train					1																3	3	1						1		1					1	1
139	1705	15094-06014	N111,2OH	Ser	[N111,2OH][Ser]	2-hydroxy-n,n,n-trimethylethanaminium l-serinate	C8H20N2O4	328.15	1.5366	test					1																3	3	1						1		1					1	1
139	1706	15094-06014	N111,2OH	Ser	[N111,2OH][Ser]	2-hydroxy-n,n,n-trimethylethanaminium l-serinate	C8H20N2O4	333.15	1.5349	train					1																3	3	1						1		1					1	1
139	1707	15094-06014	N111,2OH	Ser	[N111,2OH][Ser]	2-hydroxy-n,n,n-trimethylethanaminium l-serinate	C8H20N2O4	338.15	1.5341	train					1																3	3	1						1		1					1	1
139	1708	15094-06014	N111,2OH	Ser	[N111,2OH][Ser]	2-hydroxy-n,n,n-trimethylethanaminium l-serinate	C8H20N2O4	343.15	1.5326	train					1																3	3	1						1		1					1	1
139	1709	15094-06025	N111,2OH	Pro	[N111,2OH][Pro]	2-hydroxy-n,n,n-trimethylethanaminiume l-prolinate	C10H22N2O3	293.15	1.5419	train					1														1		3	2							1		1					1	1
139	1710	15094-06025	N111,2OH	Pro	[N111,2OH][Pro]	2-hydroxy-n,n,n-trimethylethanaminiume l-prolinate	C10H22N2O3	298.15	1.5408	test					1														1		3	2							1		1					1	1
139	1711	15094-06025	N111,2OH	Pro	[N111,2OH][Pro]	2-hydroxy-n,n,n-trimethylethanaminiume l-prolinate	C10H22N2O3	303.15	1.5402	train					1														1		3	2							1		1					1	1
139	1712	15094-06025	N111,2OH	Pro	[N111,2OH][Pro]	2-hydroxy-n,n,n-trimethylethanaminiume l-prolinate	C10H22N2O3	308.15	1.539	train					1														1		3	2							1		1					1	1
139	1713	15094-06025	N111,2OH	Pro	[N111,2OH][Pro]	2-hydroxy-n,n,n-trimethylethanaminiume l-prolinate	C10H22N2O3	313.15	1.5379	train					1														1		3	2							1		1					1	1
139	1714	15094-06025	N111,2OH	Pro	[N111,2OH][Pro]	2-hydroxy-n,n,n-trimethylethanaminiume l-prolinate	C10H22N2O3	318.15	1.5367	train					1														1		3	2							1		1					1	1
139	1715	15094-06025	N111,2OH	Pro	[N111,2OH][Pro]	2-hydroxy-n,n,n-trimethylethanaminiume l-prolinate	C10H22N2O3	323.15	1.5355	test					1														1		3	2							1		1					1	1
139	1716	15094-06025	N111,2OH	Pro	[N111,2OH][Pro]	2-hydroxy-n,n,n-trimethylethanaminiume l-prolinate	C10H22N2O3	328.15	1.5344	train					1														1		3	2							1		1					1	1
139	1717	15094-06025	N111,2OH	Pro	[N111,2OH][Pro]	2-hydroxy-n,n,n-trimethylethanaminiume l-prolinate	C10H22N2O3	333.15	1.5329	train					1														1		3	2							1		1					1	1
139	1718	15094-06025	N111,2OH	Pro	[N111,2OH][Pro]	2-hydroxy-n,n,n-trimethylethanaminiume l-prolinate	C10H22N2O3	338.15	1.5317	train					1														1		3	2							1		1					1	1
139	1719	15094-06025	N111,2OH	Pro	[N111,2OH][Pro]	2-hydroxy-n,n,n-trimethylethanaminiume l-prolinate	C10H22N2O3	343.15	1.5306	train					1														1		3	2							1		1					1	1
135	1720	15123-06005	NHHH1	HCO2	[NHHH1][HCO2]	methylammonium formate	C2H7NO2	298.15	1.4336	test					1																1								1			4					1
2	1721	15124-03009	NHHH3	NO3	[NHHH3][NO3]	propylammonium nitrate	C3H10N2O3	298.15	1.4561	train					1										1						1	2										3
136	1722	15124-06003	NHHH3	OAc	[NHHH3][OAc]	propylammonium acetate	C5H13NO2	298.15	1.4405	train					1																2	2								1		3					1
77	1723	15125-03009	NHHH4	NO3	[NHHH4][NO3]	n-butylammonium nitrate	C4H12N2O3	298.15	1.4458	train					1										1						1	3										3
135	1724	15125-06005	NHHH4	HCO2	[NHHH4][HCO2]	butylammonium formate	C5H13NO2	298.15	1.4422	train					1																1	3							1			4					1
2	1725	15125-15003	NHHH4	SCN	[NHHH4][SCN]	butylammonium thiocyanate	C5H12N2S	298.15	1.5264	test					1											1					1	3										3	1
135	1726	15126-06005	NHHH5	HCO2	[NHHH5][HCO2]	pentylammonium formate	C6H15NO2	298.15	1.4434	train					1																1	4							1			4					1
135	1727	15127-06005	NHHH,CH2CH(CH3)2	HCO2	[NHHH,CH2CH(CH3)2][HCO2]	2-methylpropylammonium formate	C5H13NO2	298.15	1.4434	train					1																2	1	1						1			4					1
135	1728	15128-06005	NHHH,(CH2)2CH(CH3)2	HCO2	[NHHH,(CH2)2CH(CH3)2][HCO2]	2-methylbutylammonium formate	C6H15NO2	298.15	1.4462	train					1																2	2	1						1			4					1
135	1729	15130-06005	NHHH,CH2CH(OH)CH3	HCO2	[NHHH,CH2CH(OH)CH3][HCO2]	2-propanolammonium formate	C4H11NO3	298.15	1.4642	train					1																1	1	1						1		1	4					1
130	1730	15153-03001	N4441	TFSI	[N4441][TFSI]	tributyl-methylammonium bis(trifluoromethanesulfonyl)amide	C15H30F6N2O4S2	283.15	1.4308	test					1												2				4	9													1				2
130	1731	15153-03001	N4441	TFSI	[N4441][TFSI]	tributyl-methylammonium bis(trifluoromethanesulfonyl)amide	C15H30F6N2O4S2	288.15	1.42933	train					1												2				4	9													1				2
130	1732	15153-03001	N4441	TFSI	[N4441][TFSI]	tributyl-methylammonium bis(trifluoromethanesulfonyl)amide	C15H30F6N2O4S2	293.15	1.42787	train					1												2				4	9													1				2
130	1733	15153-03001	N4441	TFSI	[N4441][TFSI]	tributyl-methylammonium bis(trifluoromethanesulfonyl)amide	C15H30F6N2O4S2	298.15	1.42643	train					1												2				4	9													1				2
130	1734	15153-03001	N4441	TFSI	[N4441][TFSI]	tributyl-methylammonium bis(trifluoromethanesulfonyl)amide	C15H30F6N2O4S2	303.15	1.42491	train					1												2				4	9													1				2
130	1735	15153-03001	N4441	TFSI	[N4441][TFSI]	tributyl-methylammonium bis(trifluoromethanesulfonyl)amide	C15H30F6N2O4S2	308.15	1.42338	test					1												2				4	9													1				2
130	1736	15153-03001	N4441	TFSI	[N4441][TFSI]	tributyl-methylammonium bis(trifluoromethanesulfonyl)amide	C15H30F6N2O4S2	313.15	1.42194	train					1												2				4	9													1				2
130	1737	15153-03001	N4441	TFSI	[N4441][TFSI]	tributyl-methylammonium bis(trifluoromethanesulfonyl)amide	C15H30F6N2O4S2	318.15	1.42047	train					1												2				4	9													1				2
130	1738	15153-03001	N4441	TFSI	[N4441][TFSI]	tributyl-methylammonium bis(trifluoromethanesulfonyl)amide	C15H30F6N2O4S2	323.15	1.41902	train					1												2				4	9													1				2
130	1739	15153-03001	N4441	TFSI	[N4441][TFSI]	tributyl-methylammonium bis(trifluoromethanesulfonyl)amide	C15H30F6N2O4S2	328.15	1.41758	train					1												2				4	9													1				2
130	1740	15153-03001	N4441	TFSI	[N4441][TFSI]	tributyl-methylammonium bis(trifluoromethanesulfonyl)amide	C15H30F6N2O4S2	333.15	1.41613	test					1												2				4	9													1				2
130	1741	15153-03001	N4441	TFSI	[N4441][TFSI]	tributyl-methylammonium bis(trifluoromethanesulfonyl)amide	C15H30F6N2O4S2	338.15	1.41468	train					1												2				4	9													1				2
130	1742	15153-03001	N4441	TFSI	[N4441][TFSI]	tributyl-methylammonium bis(trifluoromethanesulfonyl)amide	C15H30F6N2O4S2	343.15	1.41324	train					1												2				4	9													1				2
130	1743	15153-03001	N4441	TFSI	[N4441][TFSI]	tributyl-methylammonium bis(trifluoromethanesulfonyl)amide	C15H30F6N2O4S2	348.15	1.4118	train					1												2				4	9													1				2
130	1744	15153-03001	N4441	TFSI	[N4441][TFSI]	tributyl-methylammonium bis(trifluoromethanesulfonyl)amide	C15H30F6N2O4S2	353.15	1.4104	train					1												2				4	9													1				2
140	1745	15159-06003	NH23'3'	OAc	[NH23'3'][OAc]	diisopropylethylammonium acetate	C10H23NO2	298.15	1.4435	test					1																6	1	2						1			1					1
140	1746	15159-06005	NH23'3'	HCO2	[NH23'3'][HCOO]	diisopropylethylammonium formate	C9H21NO2	298.15	1.448	train					1																5	1	2						1			2					1
140	1747	15159-06038	NH23'3'	HF2	[NH23'3'][HF2]	diisopropylethylammonium hydrogenebisfluoride	C8H21F2N	298.15	1.4205	train					1																5	1	2									1
140	1748	15160-06003	NH13'3'	OAc	[NH13'3'][OAc]	diisopropylmethylammonium acetate	C9H21NO2	298.15	1.438	train					1																6		2						1			1					1
140	1749	15160-06005	NH13'3'	HCO2	[NH13'3'][HCO2]	diisopropylmethylammonium formate	C8H19NO2	298.15	1.4465	train					1																5		2						1			2					1
140	1750	15160-06038	NH13'3'	HF2	[NH13'3'][HF2]	diisopropylmethylammonium hydrogenebisfluoride	C7H19NF2	298.15	1.4095	test					1																5		2									1
141	1751	15168-04017	MTEOA	MeSO4	[MTEOA][MeSO4]	tris-(2-hydroxyethyl) methylamonium methylsulfate	C8H21NSO7	298.15	1.48489	train					1												1				2	6							2		3
142	1752	15173-06003	NHH1,EtOH	OAc	[NHH1,EtOH][OAc]	n-methyl-2-hydroxyethylammonium acetate	C5H13NO3	298.15	1.4494	train					1																2	2							1		1	2					1
142	1753	15173-06005	NHH1,EtOH	HCO2	[NHH1,EtOH][HCO2]	n-methyl-2-hydroxyethylammonium formate	C4H11NO3	298.35	1.4458	train					1																1	2							1		1	3					1
142	1754	15173-06032	NHH1,EtOH	CH3CH2CO2	[NHH1,EtOH][CH3CH2CO2]	n-methyl-2-hydroxyethylammonium propionate	C6H15NO3	298.2	1.4534	train					1																2	3							1		1	2					1
142	1755	15173-06033	NHH1,EtOH	CH3(CH2)2CO2	[NHH1,EtOH][CH3(CH2)2CO2]	n-methyl-2-hydroxyethylammonium butyrate	C7H17NO3	298.15	1.4549	test					1																2	4							1		1	2					1
143	1756	15173-06033	NHH1,EtOH	CH3(CH2)2CO2	[NHH1,EtOH][CH3(CH2)2CO2]	n-methyl-2-hydroxyethylammonium butanoate	C7H17NO3	288.15	1.4579	train					1																2	4							1		1	2					1
143	1757	15173-06033	NHH1,EtOH	CH3(CH2)2CO2	[NHH1,EtOH][CH3(CH2)2CO2]	n-methyl-2-hydroxyethylammonium butanoate	C7H17NO3	303.15	1.4534	train					1																2	4							1		1	2					1
143	1758	15173-06033	NHH1,EtOH	CH3(CH2)2CO2	[NHH1,EtOH][CH3(CH2)2CO2]	n-methyl-2-hydroxyethylammonium butanoate	C7H17NO3	313.15	1.4504	train					1																2	4							1		1	2					1
142	1759	15173-06043	NHH1,EtOH	(CH3)2CHCO2	[NHH1,EtOH][(CH3)2CHCO2]	n-methyl-2-hydroxyethylammonium isobutyrate	C7H17NO3	298.05	1.4511	train					1																3	2	1						1		1	2					1
142	1760	15173-06044	NHH1,EtOH	CH3(CH2)3CO2	[NHH1,EtOH][CH3(CH2)3CO2]	n-methyl-2-hydroxyethylammonium pentanoate	C8H19NO3	298.19	1.4538	test					1																2	5							1		1	2					1
134	1761	15230-04021	(Et) 2N	HSO4	[(Et) 2N][HSO4]	diethylammonium hydrosulfate	C4H13NSO4	298.15	1.422	train					1												1				2	2							1		1	2
134	1762	15230-06003	(Et) 2N	OAc	[(Et) 2N][OAc]	diethylammonium acetate	C6H15NO2	298.15	1.431	train					1																3	2							1			2					1
134	1763	15245-04021	NH111	HSO4	[NH111][HSO4]	trimethylammonium hydrosulfate	C3H11NSO4	298.15	1.406	train					1												1				3								1		1	1
134	1764	15245-06003	NH111	OAc	[NH111][OAc]	trimethylammonium acetate	C5H13NO2	298.15	1.392	train					1																4								1			1					1
132	1765	15255-02001	N11,1O1,1O2	BF4	[N11,1O1,1O2][BF4]	methoxymethylene-ethoxymethylene-dimethylammonium tetrafluoroborate	C8H20NO2BF4	298.15	1.3985	test					1					1											4	3							2
132	1766	15255-03001	N11,1O1,1O2	TFSI	[N11,1O1,1O2][TFSI]	methoxymethylene-ethoxymethylene-dimethylammonium bis((trifluoromethane)sulfonyl)amide	C10H20F6N2O6S2	298.15	1.4098	train					1												2				4	3							2						1				2
132	1767	15256-02001	N11,1O1,2O2	BF4	[N11,1O1,2O2][BF4]	methoxymethylene-ethoxyethyl-dimethylammonium tetrafluoroborate	C7H18NO2BF4	298.15	1.4007	train					1					1											4	4							2
132	1768	15256-03001	N11,1O1,2O2	TFSI	[N11,1O1,2O2][TFSI]	methoxymethylene-ethoxyethyl-dimethylammonium bis((trifluoromethane)sulfonyl)amide	C9H18F6N2O6S2	298.15	1.4095	train					1												2				4	4							2						1				2
132	1769	15257-02001	N11,1O2,1O2	BF4	[N11,1O2,1O2][BF4]	diethoxymethylene-dimethylammonium tetrafluoroborate	C8H20NO2BF4	298.15	1.4086	train					1					1											4	4							2
132	1770	15257-03001	N11,1O2,1O2	TFSI	[N11,1O2,1O2][TFSI]	diethoxymethylene-dimethylammonium bis((trifluoromethane)sulfonyl)amide	C10H20F6N2O6S2	298.15	1.4147	test					1												2				4	4							2						1				2
132	1771	15258-02001	N11,1O2,2O2	BF4	[N11,1O2,2O2][BF4]	ethoxymethylene-ethoxyethyl-ethylammonium tetrafluoroborate	C9H22NO2BF4	298.15	1.4094	train					1					1											4	5							2
132	1772	15258-03001	N11,1O2,2O2	TFSI	[N11,1O2,2O2][TFSI]	ethoxymethylene-ethoxyethyl-ethylammonium bis((trifluoromethane)sulfonyl)amide	C11H22F6N2O4S2	298.15	1.4143	train					1												2				4	5							2						1				2
132	1773	15259-02001	N11,2O2,2O2	BF4	[N11,2O2,2O2][BF4]	diethoxyethyl-dimethylammonium tetrafluoroborate	C10H24NO2BF4	298.15	1.4096	train					1					1											4	6							2
132	1774	15259-03001	N11,2O2,2O2	TFSI	[N11,2O2,2O2][TFSI]	diethoxyethyl-dimethylammonium bis((trifluoromethane)sulfonyl)amide	C12H24F6N2O4S2	298.15	1.4139	train					1												2				4	6							2						1				2
131	1775	15263-03001	N1115	TFSI	[N1115][TFSI]	trimethylpentylammonium bis((trifluoromethane)sulfonyl)amide	C10H20F6N2O4S2	283.15	1.41488	test					1												2				4	4													1				2
131	1776	15263-03001	N1115	TFSI	[N1115][TFSI]	trimethylpentylammonium bis((trifluoromethane)sulfonyl)amide	C10H20F6N2O4S2	288.15	1.41348	train					1												2				4	4													1				2
131	1777	15263-03001	N1115	TFSI	[N1115][TFSI]	trimethylpentylammonium bis((trifluoromethane)sulfonyl)amide	C10H20F6N2O4S2	293.15	1.41213	train					1												2				4	4													1				2
131	1778	15263-03001	N1115	TFSI	[N1115][TFSI]	trimethylpentylammonium bis((trifluoromethane)sulfonyl)amide	C10H20F6N2O4S2	298.15	1.41075	train					1												2				4	4													1				2
131	1779	15263-03001	N1115	TFSI	[N1115][TFSI]	trimethylpentylammonium bis((trifluoromethane)sulfonyl)amide	C10H20F6N2O4S2	303.15	1.40941	train					1												2				4	4													1				2
131	1780	15263-03001	N1115	TFSI	[N1115][TFSI]	trimethylpentylammonium bis((trifluoromethane)sulfonyl)amide	C10H20F6N2O4S2	308.15	1.40803	test					1												2				4	4													1				2
131	1781	15263-03001	N1115	TFSI	[N1115][TFSI]	trimethylpentylammonium bis((trifluoromethane)sulfonyl)amide	C10H20F6N2O4S2	313.15	1.4067	train					1												2				4	4													1				2
131	1782	15263-03001	N1115	TFSI	[N1115][TFSI]	trimethylpentylammonium bis((trifluoromethane)sulfonyl)amide	C10H20F6N2O4S2	318.15	1.40533	train					1												2				4	4													1				2
131	1783	15263-03001	N1115	TFSI	[N1115][TFSI]	trimethylpentylammonium bis((trifluoromethane)sulfonyl)amide	C10H20F6N2O4S2	323.15	1.40397	train					1												2				4	4													1				2
131	1784	15263-03001	N1115	TFSI	[N1115][TFSI]	trimethylpentylammonium bis((trifluoromethane)sulfonyl)amide	C10H20F6N2O4S2	328.15	1.40269	train					1												2				4	4													1				2
131	1785	15263-03001	N1115	TFSI	[N1115][TFSI]	trimethylpentylammonium bis((trifluoromethane)sulfonyl)amide	C10H20F6N2O4S2	333.15	1.40133	test					1												2				4	4													1				2
131	1786	15263-03001	N1115	TFSI	[N1115][TFSI]	trimethylpentylammonium bis((trifluoromethane)sulfonyl)amide	C10H20F6N2O4S2	338.15	1.40001	train					1												2				4	4													1				2
131	1787	15263-03001	N1115	TFSI	[N1115][TFSI]	trimethylpentylammonium bis((trifluoromethane)sulfonyl)amide	C10H20F6N2O4S2	343.15	1.3987	train					1												2				4	4													1				2
131	1788	15263-03001	N1115	TFSI	[N1115][TFSI]	trimethylpentylammonium bis((trifluoromethane)sulfonyl)amide	C10H20F6N2O4S2	348.15	1.39738	train					1												2				4	4													1				2
131	1789	15263-03001	N1115	TFSI	[N1115][TFSI]	trimethylpentylammonium bis((trifluoromethane)sulfonyl)amide	C10H20F6N2O4S2	353.15	1.3961	train					1												2				4	4													1				2
144	1790	15264-04021	IBAC3S	HSO4	[IBAC3S][HSO4]	n-isobutyl-3-sulfopropan-1-aminium hydrosulfate	C7H19NO7S2	293.15	1.50559	test					1												2				2	4	1						1		2	2
144	1791	15264-04021	IBAC3S	HSO4	[IBAC3S][HSO4]	n-isobutyl-3-sulfopropan-1-aminium hydrosulfate	C7H19NO7S2	298.15	1.50436	train					1												2				2	4	1						1		2	2
144	1792	15264-04021	IBAC3S	HSO4	[IBAC3S][HSO4]	n-isobutyl-3-sulfopropan-1-aminium hydrosulfate	C7H19NO7S2	303.15	1.50314	train					1												2				2	4	1						1		2	2
144	1793	15264-04021	IBAC3S	HSO4	[IBAC3S][HSO4]	n-isobutyl-3-sulfopropan-1-aminium hydrosulfate	C7H19NO7S2	308.15	1.50205	train					1												2				2	4	1						1		2	2
144	1794	15264-04021	IBAC3S	HSO4	[IBAC3S][HSO4]	n-isobutyl-3-sulfopropan-1-aminium hydrosulfate	C7H19NO7S2	313.15	1.5008	train					1												2				2	4	1						1		2	2
144	1795	15264-04021	IBAC3S	HSO4	[IBAC3S][HSO4]	n-isobutyl-3-sulfopropan-1-aminium hydrosulfate	C7H19NO7S2	318.15	1.49974	test					1												2				2	4	1						1		2	2
144	1796	15264-04021	IBAC3S	HSO4	[IBAC3S][HSO4]	n-isobutyl-3-sulfopropan-1-aminium hydrosulfate	C7H19NO7S2	323.15	1.49851	train					1												2				2	4	1						1		2	2
144	1797	15264-04021	IBAC3S	HSO4	[IBAC3S][HSO4]	n-isobutyl-3-sulfopropan-1-aminium hydrosulfate	C7H19NO7S2	328.15	1.49756	train					1												2				2	4	1						1		2	2
144	1798	15264-04021	IBAC3S	HSO4	[IBAC3S][HSO4]	n-isobutyl-3-sulfopropan-1-aminium hydrosulfate	C7H19NO7S2	333.15	1.4963	train					1												2				2	4	1						1		2	2
144	1799	15265-04021	IBAC4S	HSO4	[IBAC4S][HSO4]	n-isobutyl-4-sulfobutan-1-aminium hydrosulfate	C8H21NO7S2	293.15	1.48143	train					1												2				2	5	1						1		2	2
144	1800	15265-04021	IBAC4S	HSO4	[IBAC4S][HSO4]	n-isobutyl-4-sulfobutan-1-aminium hydrosulfate	C8H21NO7S2	298.15	1.4803	test					1												2				2	5	1						1		2	2
144	1801	15265-04021	IBAC4S	HSO4	[IBAC4S][HSO4]	n-isobutyl-4-sulfobutan-1-aminium hydrosulfate	C8H21NO7S2	303.15	1.47918	train					1												2				2	5	1						1		2	2
144	1802	15265-04021	IBAC4S	HSO4	[IBAC4S][HSO4]	n-isobutyl-4-sulfobutan-1-aminium hydrosulfate	C8H21NO7S2	308.15	1.47804	train					1												2				2	5	1						1		2	2
144	1803	15265-04021	IBAC4S	HSO4	[IBAC4S][HSO4]	n-isobutyl-4-sulfobutan-1-aminium hydrosulfate	C8H21NO7S2	313.15	1.47689	train					1												2				2	5	1						1		2	2
144	1804	15265-04021	IBAC4S	HSO4	[IBAC4S][HSO4]	n-isobutyl-4-sulfobutan-1-aminium hydrosulfate	C8H21NO7S2	318.15	1.47576	train					1												2				2	5	1						1		2	2
144	1805	15265-04021	IBAC4S	HSO4	[IBAC4S][HSO4]	n-isobutyl-4-sulfobutan-1-aminium hydrosulfate	C8H21NO7S2	323.15	1.47461	test					1												2				2	5	1						1		2	2
144	1806	15265-04021	IBAC4S	HSO4	[IBAC4S][HSO4]	n-isobutyl-4-sulfobutan-1-aminium hydrosulfate	C8H21NO7S2	328.15	1.4734	train					1												2				2	5	1						1		2	2
144	1807	15265-04021	IBAC4S	HSO4	[IBAC4S][HSO4]	n-isobutyl-4-sulfobutan-1-aminium hydrosulfate	C8H21NO7S2	333.15	1.47212	train					1												2				2	5	1						1		2	2
145	1808	16035-19001	TMG	PhO	[TMG][PhO]	[bis(bis-methyl-amino)-methylene]ammonium phenolate	C11H19N3O	298.15	1.5358	train							1														4							5	1			2		1
145	1809	16035-19001	TMG	PhO	[TMG][PhO]	[bis(bis-methyl-amino)-methylene]ammonium phenolate	C11H19N3O	303.15	1.5332	train							1														4							5	1			2		1
145	1810	16035-19001	TMG	PhO	[TMG][PhO]	[bis(bis-methyl-amino)-methylene]ammonium phenolate	C11H19N3O	308.15	1.5305	test							1														4							5	1			2		1
145	1811	16035-19001	TMG	PhO	[TMG][PhO]	[bis(bis-methyl-amino)-methylene]ammonium phenolate	C11H19N3O	313.15	1.5282	train							1														4							5	1			2		1
145	1812	16035-19001	TMG	PhO	[TMG][PhO]	[bis(bis-methyl-amino)-methylene]ammonium phenolate	C11H19N3O	318.15	1.5258	train							1														4							5	1			2		1
145	1813	16035-19001	TMG	PhO	[TMG][PhO]	[bis(bis-methyl-amino)-methylene]ammonium phenolate	C11H19N3O	323.15	1.523	train							1														4							5	1			2		1
145	1814	16035-19001	TMG	PhO	[TMG][PhO]	[bis(bis-methyl-amino)-methylene]ammonium phenolate	C11H19N3O	328.15	1.5202	train							1														4							5	1			2		1
145	1815	16035-19001	TMG	PhO	[TMG][PhO]	[bis(bis-methyl-amino)-methylene]ammonium phenolate	C11H19N3O	333.15	1.5178	test							1														4							5	1			2		1
145	1816	16035-19001	TMG	PhO	[TMG][PhO]	[bis(bis-methyl-amino)-methylene]ammonium phenolate	C11H19N3O	338.15	1.515	train							1														4							5	1			2		1
145	1817	16035-19001	TMG	PhO	[TMG][PhO]	[bis(bis-methyl-amino)-methylene]ammonium phenolate	C11H19N3O	343.15	1.5122	train							1														4							5	1			2		1
145	1818	16035-19002	TMG	4-Me-PhO	[TMG][4-Me-PhO]	[bis(bis-methyl-amino)-methylene]ammonium methylphenolate	C12H21N3O	298.15	1.5293	train							1														5							4	1			2		1
145	1819	16035-19002	TMG	4-Me-PhO	[TMG][4-Me-PhO]	[bis(bis-methyl-amino)-methylene]ammonium methylphenolate	C12H21N3O	303.15	1.527	train							1														5							4	1			2		1
145	1820	16035-19002	TMG	4-Me-PhO	[TMG][4-Me-PhO]	[bis(bis-methyl-amino)-methylene]ammonium methylphenolate	C12H21N3O	308.15	1.525	test							1														5							4	1			2		1
145	1821	16035-19002	TMG	4-Me-PhO	[TMG][4-Me-PhO]	[bis(bis-methyl-amino)-methylene]ammonium methylphenolate	C12H21N3O	313.15	1.5223	train							1														5							4	1			2		1
145	1822	16035-19002	TMG	4-Me-PhO	[TMG][4-Me-PhO]	[bis(bis-methyl-amino)-methylene]ammonium methylphenolate	C12H21N3O	318.15	1.5198	train							1														5							4	1			2		1
145	1823	16035-19002	TMG	4-Me-PhO	[TMG][4-Me-PhO]	[bis(bis-methyl-amino)-methylene]ammonium methylphenolate	C12H21N3O	323.15	1.5172	train							1														5							4	1			2		1
145	1824	16035-19002	TMG	4-Me-PhO	[TMG][4-Me-PhO]	[bis(bis-methyl-amino)-methylene]ammonium methylphenolate	C12H21N3O	328.15	1.5148	train							1														5							4	1			2		1
145	1825	16035-19002	TMG	4-Me-PhO	[TMG][4-Me-PhO]	[bis(bis-methyl-amino)-methylene]ammonium methylphenolate	C12H21N3O	333.15	1.512	test							1														5							4	1			2		1
145	1826	16035-19002	TMG	4-Me-PhO	[TMG][4-Me-PhO]	[bis(bis-methyl-amino)-methylene]ammonium methylphenolate	C12H21N3O	338.15	1.5088	train							1														5							4	1			2		1
145	1827	16035-19002	TMG	4-Me-PhO	[TMG][4-Me-PhO]	[bis(bis-methyl-amino)-methylene]ammonium methylphenolate	C12H21N3O	343.15	1.506	train							1														5							4	1			2		1
145	1828	16035-19003	TMG	4-MeO-PhO	[TMG][4-MeO-PhO]	[bis(bis-methyl-amino)-methylene]ammonium methoxyphenolate	C12H21N3O2	298.15	1.5334	train							1														5							4	2			2		1
145	1829	16035-19003	TMG	4-MeO-PhO	[TMG][4-MeO-PhO]	[bis(bis-methyl-amino)-methylene]ammonium methoxyphenolate	C12H21N3O2	303.15	1.5309	train							1														5							4	2			2		1
145	1830	16035-19003	TMG	4-MeO-PhO	[TMG][4-MeO-PhO]	[bis(bis-methyl-amino)-methylene]ammonium methoxyphenolate	C12H21N3O2	308.15	1.5282	test							1														5							4	2			2		1
145	1831	16035-19003	TMG	4-MeO-PhO	[TMG][4-MeO-PhO]	[bis(bis-methyl-amino)-methylene]ammonium methoxyphenolate	C12H21N3O2	313.15	1.5255	train							1														5							4	2			2		1
145	1832	16035-19003	TMG	4-MeO-PhO	[TMG][4-MeO-PhO]	[bis(bis-methyl-amino)-methylene]ammonium methoxyphenolate	C12H21N3O2	318.15	1.523	train							1														5							4	2			2		1
145	1833	16035-19003	TMG	4-MeO-PhO	[TMG][4-MeO-PhO]	[bis(bis-methyl-amino)-methylene]ammonium methoxyphenolate	C12H21N3O2	323.15	1.5205	train							1														5							4	2			2		1
145	1834	16035-19003	TMG	4-MeO-PhO	[TMG][4-MeO-PhO]	[bis(bis-methyl-amino)-methylene]ammonium methoxyphenolate	C12H21N3O2	328.15	1.518	train							1														5							4	2			2		1
145	1835	16035-19003	TMG	4-MeO-PhO	[TMG][4-MeO-PhO]	[bis(bis-methyl-amino)-methylene]ammonium methoxyphenolate	C12H21N3O2	333.15	1.5153	test							1														5							4	2			2		1
145	1836	16035-19003	TMG	4-MeO-PhO	[TMG][4-MeO-PhO]	[bis(bis-methyl-amino)-methylene]ammonium methoxyphenolate	C12H21N3O2	338.15	1.5126	train							1														5							4	2			2		1
145	1837	16035-19003	TMG	4-MeO-PhO	[TMG][4-MeO-PhO]	[bis(bis-methyl-amino)-methylene]ammonium methoxyphenolate	C12H21N3O2	343.15	1.5102	train							1														5							4	2			2		1
145	1838	16035-19004	TMG	4-F-PhO	[TMG][4-F-PhO]	[bis(bis-methyl-amino)-methylene]ammonium fluorophenolate	C11H18N3FO	298.15	1.5206	train							1														4							4	1			2		1
145	1839	16035-19004	TMG	4-F-PhO	[TMG][4-F-PhO]	[bis(bis-methyl-amino)-methylene]ammonium fluorophenolate	C11H18N3FO	303.15	1.5183	train							1														4							4	1			2		1
145	1840	16035-19004	TMG	4-F-PhO	[TMG][4-F-PhO]	[bis(bis-methyl-amino)-methylene]ammonium fluorophenolate	C11H18N3FO	308.15	1.5161	test							1														4							4	1			2		1
145	1841	16035-19004	TMG	4-F-PhO	[TMG][4-F-PhO]	[bis(bis-methyl-amino)-methylene]ammonium fluorophenolate	C11H18N3FO	313.15	1.5138	train							1														4							4	1			2		1
145	1842	16035-19004	TMG	4-F-PhO	[TMG][4-F-PhO]	[bis(bis-methyl-amino)-methylene]ammonium fluorophenolate	C11H18N3FO	318.15	1.5108	train							1														4							4	1			2		1
145	1843	16035-19004	TMG	4-F-PhO	[TMG][4-F-PhO]	[bis(bis-methyl-amino)-methylene]ammonium fluorophenolate	C11H18N3FO	323.15	1.5082	train							1														4							4	1			2		1
145	1844	16035-19004	TMG	4-F-PhO	[TMG][4-F-PhO]	[bis(bis-methyl-amino)-methylene]ammonium fluorophenolate	C11H18N3FO	328.15	1.5055	train							1														4							4	1			2		1
145	1845	16035-19004	TMG	4-F-PhO	[TMG][4-F-PhO]	[bis(bis-methyl-amino)-methylene]ammonium fluorophenolate	C11H18N3FO	333.15	1.503	test							1														4							4	1			2		1
145	1846	16035-19004	TMG	4-F-PhO	[TMG][4-F-PhO]	[bis(bis-methyl-amino)-methylene]ammonium fluorophenolate	C11H18N3FO	338.15	1.5006	train							1														4							4	1			2		1
145	1847	16035-19004	TMG	4-F-PhO	[TMG][4-F-PhO]	[bis(bis-methyl-amino)-methylene]ammonium fluorophenolate	C11H18N3FO	343.15	1.498	train							1														4							4	1			2		1
146	1848	17004-01001	P666,14	Cl	[P666,14]Cl	trihexyl(tetradecyl)phosphonium chloride	C32H68ClP	295.15	1.4841	train						1						1									4	28
147	1849	17004-01001	P666,14	Cl	[P666,14]Cl	trihexyl(tetradecyl)phosphonium chloride	C32H68ClP	283.15	1.48794	train						1						1									4	28
147	1850	17004-01001	P666,14	Cl	[P666,14]Cl	trihexyl(tetradecyl)phosphonium chloride	C32H68ClP	288.15	1.48635	test						1						1									4	28
147	1851	17004-01001	P666,14	Cl	[P666,14]Cl	trihexyl(tetradecyl)phosphonium chloride	C32H68ClP	293.15	1.48471	train						1						1									4	28
147	1852	17004-01001	P666,14	Cl	[P666,14]Cl	trihexyl(tetradecyl)phosphonium chloride	C32H68ClP	298.15	1.48309	train						1						1									4	28
147	1853	17004-01001	P666,14	Cl	[P666,14]Cl	trihexyl(tetradecyl)phosphonium chloride	C32H68ClP	303.15	1.48142	train						1						1									4	28
147	1854	17004-01001	P666,14	Cl	[P666,14]Cl	trihexyl(tetradecyl)phosphonium chloride	C32H68ClP	308.15	1.47973	train						1						1									4	28
147	1855	17004-01001	P666,14	Cl	[P666,14]Cl	trihexyl(tetradecyl)phosphonium chloride	C32H68ClP	313.15	1.47796	test						1						1									4	28
147	1856	17004-01001	P666,14	Cl	[P666,14]Cl	trihexyl(tetradecyl)phosphonium chloride	C32H68ClP	318.15	1.4757	train						1						1									4	28
147	1857	17004-01001	P666,14	Cl	[P666,14]Cl	trihexyl(tetradecyl)phosphonium chloride	C32H68ClP	323.15	1.47387	train						1						1									4	28
147	1858	17004-01001	P666,14	Cl	[P666,14]Cl	trihexyl(tetradecyl)phosphonium chloride	C32H68ClP	328.15	1.4721	train						1						1									4	28
147	1859	17004-01001	P666,14	Cl	[P666,14]Cl	trihexyl(tetradecyl)phosphonium chloride	C32H68ClP	333.15	1.47029	train						1						1									4	28
147	1860	17004-01001	P666,14	Cl	[P666,14]Cl	trihexyl(tetradecyl)phosphonium chloride	C32H68ClP	338.15	1.46854	test						1						1									4	28
147	1861	17004-01001	P666,14	Cl	[P666,14]Cl	trihexyl(tetradecyl)phosphonium chloride	C32H68ClP	343.15	1.46677	train						1						1									4	28
147	1862	17004-01001	P666,14	Cl	[P666,14]Cl	trihexyl(tetradecyl)phosphonium chloride	C32H68ClP	348.15	1.46504	train						1						1									4	28
147	1863	17004-01001	P666,14	Cl	[P666,14]Cl	trihexyl(tetradecyl)phosphonium chloride	C32H68ClP	353.15	1.4634	train						1						1									4	28
148	1864	17004-01001	P666,14	Cl	[P666,14]Cl	trihexyl(tetradecyl)phosphonium chloride	C32H68ClP	298.15	1.48175	train						1						1									4	28
58	1865	17004-01002	P666,14	Br	[P666,14]Br	tetradecyltrihexylphosphonium bromide	C32H68BrP	298.15	1.4879	test						1							1								4	28
147	1866	17004-01002	P666,14	Br	[P666,14]Br	tetradecyltrihexylphosphonium bromide	C32H68BrP	283.15	1.49456	train						1							1								4	28
147	1867	17004-01002	P666,14	Br	[P666,14]Br	tetradecyltrihexylphosphonium bromide	C32H68BrP	288.15	1.49295	train						1							1								4	28
147	1868	17004-01002	P666,14	Br	[P666,14]Br	tetradecyltrihexylphosphonium bromide	C32H68BrP	293.15	1.49139	train						1							1								4	28
147	1869	17004-01002	P666,14	Br	[P666,14]Br	tetradecyltrihexylphosphonium bromide	C32H68BrP	298.15	1.48977	train						1							1								4	28
147	1870	17004-01002	P666,14	Br	[P666,14]Br	tetradecyltrihexylphosphonium bromide	C32H68BrP	303.15	1.48814	test						1							1								4	28
147	1871	17004-01002	P666,14	Br	[P666,14]Br	tetradecyltrihexylphosphonium bromide	C32H68BrP	308.15	1.48654	train						1							1								4	28
147	1872	17004-01002	P666,14	Br	[P666,14]Br	tetradecyltrihexylphosphonium bromide	C32H68BrP	313.15	1.4849	train						1							1								4	28
147	1873	17004-01002	P666,14	Br	[P666,14]Br	tetradecyltrihexylphosphonium bromide	C32H68BrP	318.15	1.4833	train						1							1								4	28
147	1874	17004-01002	P666,14	Br	[P666,14]Br	tetradecyltrihexylphosphonium bromide	C32H68BrP	323.15	1.48167	train						1							1								4	28
147	1875	17004-01002	P666,14	Br	[P666,14]Br	tetradecyltrihexylphosphonium bromide	C32H68BrP	328.15	1.47999	test						1							1								4	28
147	1876	17004-01002	P666,14	Br	[P666,14]Br	tetradecyltrihexylphosphonium bromide	C32H68BrP	333.15	1.47834	train						1							1								4	28
147	1877	17004-01002	P666,14	Br	[P666,14]Br	tetradecyltrihexylphosphonium bromide	C32H68BrP	338.15	1.47677	train						1							1								4	28
147	1878	17004-01002	P666,14	Br	[P666,14]Br	tetradecyltrihexylphosphonium bromide	C32H68BrP	343.15	1.47511	train						1							1								4	28
147	1879	17004-01002	P666,14	Br	[P666,14]Br	tetradecyltrihexylphosphonium bromide	C32H68BrP	348.15	1.47346	train						1							1								4	28
147	1880	17004-01002	P666,14	Br	[P666,14]Br	tetradecyltrihexylphosphonium bromide	C32H68BrP	353.15	1.47189	test						1							1								4	28
146	1881	17004-02001	P666,14	BF4	[P666,14][BF4]	trihexyl-tetradecylphosphonium tetrafluoroborate	C32H68PBF4	295.15	1.4564	train						1				1											4	28
146	1882	17004-03001	P666,14	TFSI	[P666,14][TFSI]	trihexyl-tetradecylphosphonium bis((trifluoromethyl)sulfonyl)imide	C34H68F6NO4PS2	295.15	1.4507	train						1											2				4	28													1				2
13	1883	17004-03001	P666,14	TFSI	[P666,14][TFSI]	trihexyl-tetradecylphosphonium bis((trifluoromethyl)sulfonyl)imide	C34H68F6NO4PS2	298	1.4496	train						1											2				4	28													1				2
13	1884	17004-03001	P666,14	TFSI	[P666,14][TFSI]	trihexyl-tetradecylphosphonium bis((trifluoromethyl)sulfonyl)imide	C34H68F6NO4PS2	298	1.4496	train						1											2				4	28													1				2
147	1885	17004-03001	P666,14	TFSI	[P666,14][TFSI]	trihexyl-tetradecylphosphonium bis((trifluoromethyl)sulfonyl)imide	C34H68F6NO4PS2	283.15	1.45436	test						1											2				4	28													1				2
147	1886	17004-03001	P666,14	TFSI	[P666,14][TFSI]	trihexyl-tetradecylphosphonium bis((trifluoromethyl)sulfonyl)imide	C34H68F6NO4PS2	288.15	1.45279	train						1											2				4	28													1				2
147	1887	17004-03001	P666,14	TFSI	[P666,14][TFSI]	trihexyl-tetradecylphosphonium bis((trifluoromethyl)sulfonyl)imide	C34H68F6NO4PS2	293.15	1.4512	train						1											2				4	28													1				2
147	1888	17004-03001	P666,14	TFSI	[P666,14][TFSI]	trihexyl-tetradecylphosphonium bis((trifluoromethyl)sulfonyl)imide	C34H68F6NO4PS2	298.15	1.4496	train						1											2				4	28													1				2
147	1889	17004-03001	P666,14	TFSI	[P666,14][TFSI]	trihexyl-tetradecylphosphonium bis((trifluoromethyl)sulfonyl)imide	C34H68F6NO4PS2	303.15	1.44797	train						1											2				4	28													1				2
147	1890	17004-03001	P666,14	TFSI	[P666,14][TFSI]	trihexyl-tetradecylphosphonium bis((trifluoromethyl)sulfonyl)imide	C34H68F6NO4PS2	308.15	1.44637	test						1											2				4	28													1				2
147	1891	17004-03001	P666,14	TFSI	[P666,14][TFSI]	trihexyl-tetradecylphosphonium bis((trifluoromethyl)sulfonyl)imide	C34H68F6NO4PS2	313.15	1.44476	train						1											2				4	28													1				2
147	1892	17004-03001	P666,14	TFSI	[P666,14][TFSI]	trihexyl-tetradecylphosphonium bis((trifluoromethyl)sulfonyl)imide	C34H68F6NO4PS2	318.15	1.44317	train						1											2				4	28													1				2
147	1893	17004-03001	P666,14	TFSI	[P666,14][TFSI]	trihexyl-tetradecylphosphonium bis((trifluoromethyl)sulfonyl)imide	C34H68F6NO4PS2	323.15	1.44158	train						1											2				4	28													1				2
147	1894	17004-03001	P666,14	TFSI	[P666,14][TFSI]	trihexyl-tetradecylphosphonium bis((trifluoromethyl)sulfonyl)imide	C34H68F6NO4PS2	328.15	1.43948	train						1											2				4	28													1				2
147	1895	17004-03001	P666,14	TFSI	[P666,14][TFSI]	trihexyl-tetradecylphosphonium bis((trifluoromethyl)sulfonyl)imide	C34H68F6NO4PS2	333.15	1.43836	test						1											2				4	28													1				2
147	1896	17004-03001	P666,14	TFSI	[P666,14][TFSI]	trihexyl-tetradecylphosphonium bis((trifluoromethyl)sulfonyl)imide	C34H68F6NO4PS2	338.15	1.43681	train						1											2				4	28													1				2
147	1897	17004-03001	P666,14	TFSI	[P666,14][TFSI]	trihexyl-tetradecylphosphonium bis((trifluoromethyl)sulfonyl)imide	C34H68F6NO4PS2	343.15	1.43524	train						1											2				4	28													1				2
147	1898	17004-03001	P666,14	TFSI	[P666,14][TFSI]	trihexyl-tetradecylphosphonium bis((trifluoromethyl)sulfonyl)imide	C34H68F6NO4PS2	348.15	1.4337	train						1											2				4	28													1				2
146	1899	17004-03004	P666,14	dca	[P666,14][dca]	tetradecyl(trihexyl)phosphonium dicyanamide	C34H68N3P	295.15	1.484	train						1										2					4	28													1
147	1900	17004-03004	P666,14	dca	[P666,14][dca]	tetradecyl(trihexyl)phosphonium dicyanamide	C34H68N3P	283.15	1.48861	test						1										2					4	28													1
147	1901	17004-03004	P666,14	dca	[P666,14][dca]	tetradecyl(trihexyl)phosphonium dicyanamide	C34H68N3P	288.15	1.48706	train						1										2					4	28													1
147	1902	17004-03004	P666,14	dca	[P666,14][dca]	tetradecyl(trihexyl)phosphonium dicyanamide	C34H68N3P	293.15	1.48545	train						1										2					4	28													1
147	1903	17004-03004	P666,14	dca	[P666,14][dca]	tetradecyl(trihexyl)phosphonium dicyanamide	C34H68N3P	298.15	1.48387	train						1										2					4	28													1
147	1904	17004-03004	P666,14	dca	[P666,14][dca]	tetradecyl(trihexyl)phosphonium dicyanamide	C34H68N3P	303.15	1.48228	train						1										2					4	28													1
147	1905	17004-03004	P666,14	dca	[P666,14][dca]	tetradecyl(trihexyl)phosphonium dicyanamide	C34H68N3P	308.15	1.48064	test						1										2					4	28													1
147	1906	17004-03004	P666,14	dca	[P666,14][dca]	tetradecyl(trihexyl)phosphonium dicyanamide	C34H68N3P	313.15	1.47902	train						1										2					4	28													1
147	1907	17004-03004	P666,14	dca	[P666,14][dca]	tetradecyl(trihexyl)phosphonium dicyanamide	C34H68N3P	318.15	1.47744	train						1										2					4	28													1
147	1908	17004-03004	P666,14	dca	[P666,14][dca]	tetradecyl(trihexyl)phosphonium dicyanamide	C34H68N3P	323.15	1.47585	train						1										2					4	28													1
147	1909	17004-03004	P666,14	dca	[P666,14][dca]	tetradecyl(trihexyl)phosphonium dicyanamide	C34H68N3P	328.15	1.47421	train						1										2					4	28													1
147	1910	17004-03004	P666,14	dca	[P666,14][dca]	tetradecyl(trihexyl)phosphonium dicyanamide	C34H68N3P	333.15	1.47252	test						1										2					4	28													1
147	1911	17004-03004	P666,14	dca	[P666,14][dca]	tetradecyl(trihexyl)phosphonium dicyanamide	C34H68N3P	338.15	1.4709	train						1										2					4	28													1
147	1912	17004-03004	P666,14	dca	[P666,14][dca]	tetradecyl(trihexyl)phosphonium dicyanamide	C34H68N3P	343.15	1.46926	train						1										2					4	28													1
147	1913	17004-03004	P666,14	dca	[P666,14][dca]	tetradecyl(trihexyl)phosphonium dicyanamide	C34H68N3P	348.15	1.46767	train						1										2					4	28													1
147	1914	17004-03004	P666,14	dca	[P666,14][dca]	tetradecyl(trihexyl)phosphonium dicyanamide	C34H68N3P	353.15	1.46599	train						1										2					4	28													1
146	1915	17004-03012	P666,14	Sac	[P666,14][Sac]	trihexyl-tetradecylphosphonium saccharinate	C39H72NO3PS	295.15	1.5047	test						1											1				4	28						4		1				1	1		1
147	1916	17004-04002	P666,14	mesy	[P666,14][mesy]	trihexyltetradecylphosphonium methanesulfonate	C33H71O3PS	283.15	1.47813	train						1											1				5	28							1
147	1917	17004-04002	P666,14	mesy	[P666,14][mesy]	trihexyltetradecylphosphonium methanesulfonate	C33H71O3PS	288.15	1.47668	train						1											1				5	28							1
147	1918	17004-04002	P666,14	mesy	[P666,14][mesy]	trihexyltetradecylphosphonium methanesulfonate	C33H71O3PS	293.15	1.47507	train						1											1				5	28							1
147	1919	17004-04002	P666,14	mesy	[P666,14][mesy]	trihexyltetradecylphosphonium methanesulfonate	C33H71O3PS	298.15	1.47346	train						1											1				5	28							1
147	1920	17004-04002	P666,14	mesy	[P666,14][mesy]	trihexyltetradecylphosphonium methanesulfonate	C33H71O3PS	303.15	1.47186	test						1											1				5	28							1
147	1921	17004-04002	P666,14	mesy	[P666,14][mesy]	trihexyltetradecylphosphonium methanesulfonate	C33H71O3PS	308.15	1.47025	train						1											1				5	28							1
147	1922	17004-04002	P666,14	mesy	[P666,14][mesy]	trihexyltetradecylphosphonium methanesulfonate	C33H71O3PS	313.15	1.46865	train						1											1				5	28							1
147	1923	17004-04002	P666,14	mesy	[P666,14][mesy]	trihexyltetradecylphosphonium methanesulfonate	C33H71O3PS	318.15	1.46702	train						1											1				5	28							1
147	1924	17004-04002	P666,14	mesy	[P666,14][mesy]	trihexyltetradecylphosphonium methanesulfonate	C33H71O3PS	323.15	1.4654	train						1											1				5	28							1
147	1925	17004-04002	P666,14	mesy	[P666,14][mesy]	trihexyltetradecylphosphonium methanesulfonate	C33H71O3PS	328.15	1.4638	test						1											1				5	28							1
147	1926	17004-04002	P666,14	mesy	[P666,14][mesy]	trihexyltetradecylphosphonium methanesulfonate	C33H71O3PS	333.15	1.46217	train						1											1				5	28							1
147	1927	17004-04002	P666,14	mesy	[P666,14][mesy]	trihexyltetradecylphosphonium methanesulfonate	C33H71O3PS	338.15	1.46053	train						1											1				5	28							1
147	1928	17004-04002	P666,14	mesy	[P666,14][mesy]	trihexyltetradecylphosphonium methanesulfonate	C33H71O3PS	343.15	1.45895	train						1											1				5	28							1
147	1929	17004-04002	P666,14	mesy	[P666,14][mesy]	trihexyltetradecylphosphonium methanesulfonate	C33H71O3PS	348.15	1.45727	train						1											1				5	28							1
147	1930	17004-04002	P666,14	mesy	[P666,14][mesy]	trihexyltetradecylphosphonium methanesulfonate	C33H71O3PS	353.15	1.45572	test						1											1				5	28							1
146	1931	17004-04003	P666,14	TfO	[P666,14][TfO]	trihexyl-tetradecylphosphonium trifluoromethanesulfonate	C33H68F3PO3S	295.15	1.4585	train						1											1				4	28							1										1
13	1932	17004-04003	P666,14	TfO	[P666,14][TfO]	trihexyl-tetradecylphosphonium trifluoromethanesulfonate	C33H68F3PO3S	298	1.4577	train						1											1				4	28							1										1
13	1933	17004-04003	P666,14	TfO	[P666,14][TfO]	trihexyl-tetradecylphosphonium trifluoromethanesulfonate	C33H68F3PO3S	298	1.4577	train						1											1				4	28							1										1
147	1934	17004-05029	P666,14	—	—	trihexyltetradecylphosphonium bis(2,4,4-trimethylpentyl)phosphinate	C48H102O2P2	283.15	1.47702	train						1												1			12	32	2	2					1
147	1935	17004-05029	P666,14	—	—	trihexyltetradecylphosphonium bis(2,4,4-trimethylpentyl)phosphinate	C48H102O2P2	288.15	1.47538	test						1												1			12	32	2	2					1
147	1936	17004-05029	P666,14	—	—	trihexyltetradecylphosphonium bis(2,4,4-trimethylpentyl)phosphinate	C48H102O2P2	293.15	1.47374	train						1												1			12	32	2	2					1
147	1937	17004-05029	P666,14	—	—	trihexyltetradecylphosphonium bis(2,4,4-trimethylpentyl)phosphinate	C48H102O2P2	298.15	1.47209	train						1												1			12	32	2	2					1
147	1938	17004-05029	P666,14	—	—	trihexyltetradecylphosphonium bis(2,4,4-trimethylpentyl)phosphinate	C48H102O2P2	303.15	1.47044	train						1												1			12	32	2	2					1
147	1939	17004-05029	P666,14	—	—	trihexyltetradecylphosphonium bis(2,4,4-trimethylpentyl)phosphinate	C48H102O2P2	308.15	1.46879	train						1												1			12	32	2	2					1
147	1940	17004-05029	P666,14	—	—	trihexyltetradecylphosphonium bis(2,4,4-trimethylpentyl)phosphinate	C48H102O2P2	313.15	1.46712	test						1												1			12	32	2	2					1
147	1941	17004-05029	P666,14	—	—	trihexyltetradecylphosphonium bis(2,4,4-trimethylpentyl)phosphinate	C48H102O2P2	318.15	1.46546	train						1												1			12	32	2	2					1
147	1942	17004-05029	P666,14	—	—	trihexyltetradecylphosphonium bis(2,4,4-trimethylpentyl)phosphinate	C48H102O2P2	323.15	1.46383	train						1												1			12	32	2	2					1
147	1943	17004-05029	P666,14	—	—	trihexyltetradecylphosphonium bis(2,4,4-trimethylpentyl)phosphinate	C48H102O2P2	328.15	1.46216	train						1												1			12	32	2	2					1
147	1944	17004-05029	P666,14	—	—	trihexyltetradecylphosphonium bis(2,4,4-trimethylpentyl)phosphinate	C48H102O2P2	333.15	1.46056	train						1												1			12	32	2	2					1
147	1945	17004-05029	P666,14	—	—	trihexyltetradecylphosphonium bis(2,4,4-trimethylpentyl)phosphinate	C48H102O2P2	338.15	1.45893	test						1												1			12	32	2	2					1
147	1946	17004-05029	P666,14	—	—	trihexyltetradecylphosphonium bis(2,4,4-trimethylpentyl)phosphinate	C48H102O2P2	343.15	1.45716	train						1												1			12	32	2	2					1
147	1947	17004-05029	P666,14	—	—	trihexyltetradecylphosphonium bis(2,4,4-trimethylpentyl)phosphinate	C48H102O2P2	348.15	1.45553	train						1												1			12	32	2	2					1
147	1948	17004-05029	P666,14	—	—	trihexyltetradecylphosphonium bis(2,4,4-trimethylpentyl)phosphinate	C48H102O2P2	353.15	1.45387	train						1												1			12	32	2	2					1
148	1949	17004-05029	P666,14	—	—	trihexyltetradecylphosphonium bis(2,4,4-trimethylpentyl)phosphinate	C48H102O2P2	298.15	1.47125	train						1												1			12	32	2	2					1
13	1950	17004-06003	P666,14	OAc	[P666,14][OAc]	trihexyl-tetradecylphosphonium acetate	C34H71PO2	298	1.4818	test						1															5	28							1								1
13	1951	17004-06003	P666,14	OAc	[P666,14][OAc]	trihexyl-tetradecylphosphonium acetate	C34H71PO2	298	1.4818	train						1															5	28							1								1
147	1952	17004-06006	P666,14	C8CO2	[P666,14][C8CO2]	trihexyltetradecylphosphonium decanoate	C42H87O2P	283.15	1.47754	train						1															5	36							1								1
147	1953	17004-06006	P666,14	C8CO2	[P666,14][C8CO2]	trihexyltetradecylphosphonium decanoate	C42H87O2P	288.15	1.47586	train						1															5	36							1								1
147	1954	17004-06006	P666,14	C8CO2	[P666,14][C8CO2]	trihexyltetradecylphosphonium decanoate	C42H87O2P	293.15	1.47413	train						1															5	36							1								1
147	1955	17004-06006	P666,14	C8CO2	[P666,14][C8CO2]	trihexyltetradecylphosphonium decanoate	C42H87O2P	298.15	1.47242	test						1															5	36							1								1
147	1956	17004-06006	P666,14	C8CO2	[P666,14][C8CO2]	trihexyltetradecylphosphonium decanoate	C42H87O2P	303.15	1.47069	train						1															5	36							1								1
147	1957	17004-06006	P666,14	C8CO2	[P666,14][C8CO2]	trihexyltetradecylphosphonium decanoate	C42H87O2P	308.15	1.46896	train						1															5	36							1								1
147	1958	17004-06006	P666,14	C8CO2	[P666,14][C8CO2]	trihexyltetradecylphosphonium decanoate	C42H87O2P	313.15	1.46722	train						1															5	36							1								1
147	1959	17004-06006	P666,14	C8CO2	[P666,14][C8CO2]	trihexyltetradecylphosphonium decanoate	C42H87O2P	318.15	1.46548	train						1															5	36							1								1
147	1960	17004-06006	P666,14	C8CO2	[P666,14][C8CO2]	trihexyltetradecylphosphonium decanoate	C42H87O2P	323.15	1.46341	test						1															5	36							1								1
147	1961	17004-06006	P666,14	C8CO2	[P666,14][C8CO2]	trihexyltetradecylphosphonium decanoate	C42H87O2P	328.15	1.46165	train						1															5	36							1								1
147	1962	17004-06006	P666,14	C8CO2	[P666,14][C8CO2]	trihexyltetradecylphosphonium decanoate	C42H87O2P	333.15	1.46002	train						1															5	36							1								1
147	1963	17004-06006	P666,14	C8CO2	[P666,14][C8CO2]	trihexyltetradecylphosphonium decanoate	C42H87O2P	338.15	1.45828	train						1															5	36							1								1
147	1964	17004-06006	P666,14	C8CO2	[P666,14][C8CO2]	trihexyltetradecylphosphonium decanoate	C42H87O2P	343.15	1.4566	train						1															5	36							1								1
147	1965	17004-06006	P666,14	C8CO2	[P666,14][C8CO2]	trihexyltetradecylphosphonium decanoate	C42H87O2P	348.15	1.45497	test						1															5	36							1								1
147	1966	17004-06006	P666,14	C8CO2	[P666,14][C8CO2]	trihexyltetradecylphosphonium decanoate	C42H87O2P	353.15	1.45327	train						1															5	36							1								1
146	1967	17019-03001	P8888	TFSI	[P8888][TFSI]	tetraoctylphosphonium bis((trifluoromethyl)sulfonyl)imide	C34H68F6NO4PS2	295.15	1.511	train						1											2				4	28													1				2
149	1968	17032-04017	P4441	MeSO4	[P4441][MeSO4]	tributylmethylphosphonium methylsulfate	C14H33O4PS	293.15	1.47489	train						1											1				5	9							2
149	1969	17032-04017	P4441	MeSO4	[P4441][MeSO4]	tributylmethylphosphonium methylsulfate	C14H33O4PS	298.15	1.47344	train						1											1				5	9							2
149	1970	17032-04017	P4441	MeSO4	[P4441][MeSO4]	tributylmethylphosphonium methylsulfate	C14H33O4PS	303.15	1.47199	test						1											1				5	9							2
149	1971	17032-04017	P4441	MeSO4	[P4441][MeSO4]	tributylmethylphosphonium methylsulfate	C14H33O4PS	308.15	1.47054	train						1											1				5	9							2
149	1972	17032-04017	P4441	MeSO4	[P4441][MeSO4]	tributylmethylphosphonium methylsulfate	C14H33O4PS	313.15	1.46907	train						1											1				5	9							2
149	1973	17032-04017	P4441	MeSO4	[P4441][MeSO4]	tributylmethylphosphonium methylsulfate	C14H33O4PS	318.15	1.46762	train						1											1				5	9							2
149	1974	17032-04017	P4441	MeSO4	[P4441][MeSO4]	tributylmethylphosphonium methylsulfate	C14H33O4PS	323.15	1.46616	train						1											1				5	9							2
149	1975	17032-04017	P4441	MeSO4	[P4441][MeSO4]	tributylmethylphosphonium methylsulfate	C14H33O4PS	328.15	1.46474	test						1											1				5	9							2
149	1976	17032-04017	P4441	MeSO4	[P4441][MeSO4]	tributylmethylphosphonium methylsulfate	C14H33O4PS	333.15	1.46328	train						1											1				5	9							2
149	1977	17032-04017	P4441	MeSO4	[P4441][MeSO4]	tributylmethylphosphonium methylsulfate	C14H33O4PS	338.15	1.46188	train						1											1				5	9							2
149	1978	17032-04017	P4441	MeSO4	[P4441][MeSO4]	tributylmethylphosphonium methylsulfate	C14H33O4PS	343.15	1.46048	train						1											1				5	9							2
146	1979	17034-05012	P2444	DEP	[P4442][DEP]	tributyl(ethyl)phosphonium diethylphosphate	C18H42O4P2	295.15	1.4698	train						1												1			6	12							3
149	1980	17034-05012	P2444	DEP	[P4442][DEP]	tributylethylphosphonium diethylphosphate	C18H42O4P2	293.15	1.46897	test						1												1			6	12							3
149	1981	17034-05012	P2444	DEP	[P4442][DEP]	tributylethylphosphonium diethylphosphate	C18H42O4P2	298.15	1.46732	train						1												1			6	12							3
149	1982	17034-05012	P2444	DEP	[P4442][DEP]	tributylethylphosphonium diethylphosphate	C18H42O4P2	303.15	1.46567	train						1												1			6	12							3
149	1983	17034-05012	P2444	DEP	[P4442][DEP]	tributylethylphosphonium diethylphosphate	C18H42O4P2	308.15	1.46402	train						1												1			6	12							3
149	1984	17034-05012	P2444	DEP	[P4442][DEP]	tributylethylphosphonium diethylphosphate	C18H42O4P2	313.15	1.46234	train						1												1			6	12							3
149	1985	17034-05012	P2444	DEP	[P4442][DEP]	tributylethylphosphonium diethylphosphate	C18H42O4P2	318.15	1.46069	test						1												1			6	12							3
149	1986	17034-05012	P2444	DEP	[P4442][DEP]	tributylethylphosphonium diethylphosphate	C18H42O4P2	323.15	1.45904	train						1												1			6	12							3
149	1987	17034-05012	P2444	DEP	[P4442][DEP]	tributylethylphosphonium diethylphosphate	C18H42O4P2	328.15	1.45738	train						1												1			6	12							3
149	1988	17034-05012	P2444	DEP	[P4442][DEP]	tributylethylphosphonium diethylphosphate	C18H42O4P2	333.15	1.45573	train						1												1			6	12							3
149	1989	17034-05012	P2444	DEP	[P4442][DEP]	tributylethylphosphonium diethylphosphate	C18H42O4P2	338.15	1.45409	train						1												1			6	12							3
149	1990	17034-05012	P2444	DEP	[P4442][DEP]	tributylethylphosphonium diethylphosphate	C18H42O4P2	343.15	1.4524	test						1												1			6	12							3
146	1991	17036-03001	C12(P333)2	TFSI	[C12(P333)2][TFSI]	1,12-di(tripropylphosphonium)dodecane bis(trifluoromethane)sulfonamide	C32H66F6NO4P2S2	295.15	1.4514	train						2											4				6	24													2				4
146	1992	17037-03001	PEG3(P333)2	TFSI	[PEG3(P333)2][TFSI]	1,11-di(tripropylphosphonium)-3,6,9-trioxaundecane bis(trifluoromethane)sulfonamide	C28H58F6NO7P2S2	295.15	1.4469	train						2											4				6	20							3						2				4
149	1993	17039-01001	P4448	Cl	[P4448]Cl	tributyloctylphosphonium chloride	C20H44ClP	293.15	1.49551	train						1						1									4	16
149	1994	17039-01001	P4448	Cl	[P4448]Cl	tributyloctylphosphonium chloride	C20H44ClP	298.15	1.49392	train						1						1									4	16
149	1995	17039-01001	P4448	Cl	[P4448]Cl	tributyloctylphosphonium chloride	C20H44ClP	303.15	1.49231	test						1						1									4	16
149	1996	17039-01001	P4448	Cl	[P4448]Cl	tributyloctylphosphonium chloride	C20H44ClP	308.15	1.49071	train						1						1									4	16
149	1997	17039-01001	P4448	Cl	[P4448]Cl	tributyloctylphosphonium chloride	C20H44ClP	313.15	1.48911	train						1						1									4	16
[truncated: 141 more rows]
[truncated: 2 more columns]

## Sheet: Table S3
Table S3 The ID code and the structure of cations and in this paper.
ID Code	Name	Formula	M/g mol−1	Structure
01001	1-Methylimidazolium	C4H7N2	83.11
02001	1,3-Dimethylimidazolium	C5H9N2	97.14
02002	1,2-Dimethylimidazolium	C5H9N2	97.14
02003	1-Ethyl-3-methylimidazolium	C6H11N2	111.17
02007	1,3-Diethylimidazolium	C7H13N2	125.19
02008	1-Propyl-3-methylimidazolium	C7H13N2	125.19
02011	1-Butyl-3-methylimidazolium	C8H15N2	139.22
02016	1-Amyl-3-methylimidazolium	C9H17N2	153.25
02017	1-Butyl-3-ethylimidazolium	C9H17N2	153.25
02021	1-Hexyl-3-methylimidazolium	C10H19N2	167.27
02024	1-Heptyl-3-methylimidazolium	C11H21N2	181.3
02026	1,3-Dibutylimidazolium	C11H21N2	181.3
02027	1-Benzyl-3-methylimidazolium	C11H13N2	173.24
02029	1-Octyl-3-methylimidazolium	C12H23N2	195.33
02039	1-Decyl-3-methylimidazolium	C14H27N2	223.38
02046	1-Dodecyl-3-methylimidazolium	C16H31N2	251.44
02051	1-Tetradecyl-3-methylimidazolium	C18H35N2	279.49
02199	1-Methyl-3-allylimidazolium	C7H11N2	123.18
02277	1-oleyl-3-methylimidazolium (9,10-cis-octadecenyl)	C22H41N2	333.58
02301	1-propyronitrile-3-butylimidazolium	C10H16N3	178.26
02302	1-propyronitrile-3-hexylimidazolium	C12H20N3	206.31
02303	1-propyronitrile-3-octylimidazolium	C14H24N3	234.36
02304	1-propyronitrile-3-decylimidazolium	C16H28N3	262.42
02335	1-allyl-3-butylimidazolium	C10H17N2	165.26
02336	1-allyl-3-hexylimidazolium	C12H21N2	193.31
02337	1-allyl-3-octylimidazolium	C14H25N2	221.37
02338	1-allyl-3-decylimidazolium	C16H29N2	249.42
02339	1-allyl-3-dodecylimidazolium	C10H17N2	277.47
02340	1-allyl-3-tetradecylimidazolium	C18H33N2	305.53
02341	1-vinyl-3-allylimidazolium	C8H11N2	135.19
02342	1-vinyl-3-octylimidazolium	C13H23N2	207.34
02343	1-vinyl-3-decylimidazolium	C15H27N2	235.39
02360	1-(6-hydroxyhexyl)imidazolium	C9H17N2O	169.25
02361	1-(6-hydroxyhexyl)-3-methylimidazolium	C10H19N2O	183.27
02362	1-(6-hydroxylhexyl)-3-ethylimidazolium	C11H21N2O	197.3
02363	1-(6-hydroxylhexyl)-3-butylimidazolium	C13H25N2O	225.35
02388	1-methyl-3-(9Z,12Z)-9,12-octadecadien-1-yl-1H-imidazolium	C22H39N2	331.57
02399	1-methyl-3-(9E)-9-octadecen-1-yl-1H-Imidazolium	C22H41N2	333.58
02400	1-(2-cyanoethyl)-3-(2-hydroxyethyl)-imidazolium	C8H12N3O	166.2
02401	1-(2-cyanoethyl)-3-(2-propen-1-yl)-imidazolium	C9H12N3	162.21
03004	1-Ethyl-3,5-dimethylimidazolium	C7H13N2	125.19
03005	1-Ethyl-2,3-dimethylimidazolium	C7H13N2	125.19
03009	1-Propyl-2,3-dimethylimidazolium	C8H15N2	139.22
03010	1-Butyl-2,3-dimethylimidazolium	C9H17N2	153.25
03012	1-Octyl-2,3-dimethylimidazolium	C13H25N2	209.35
03058	1-Hexyl-2,3-dimethylimidazolium	C11H21N2	181.3
03088	1,3-Diethyl-2-methylimidazolium	C8H15N2	139.22
03112	1-pentyl-2,3dimethylimidazolium	C10H19N2	167.27
03113	1-heptyl-2,3dimethylimidazolium	C12H23N2	195.33
08003	N-methyl-N-propyl-pyrrolidinium	C8H18N	128.24
08004	N-methyl-N-butyl-pyrrolidinium	C9H20N	142.26
08017	pyrrolidinium	C4H10N	72.13
08025	1-cyanomethyl-1-meth-ylpyrrolidinium	C7H13N2	125.19
08026	1-cyanoethyl-1-meth-ylpyrrolidinium	C8H15N2	139.22
08027	1-cyanopropyl-1-meth-ylpyrrolidinium	C9H17N2	153.25
08028	1-cyanoamyl-1-meth-ylpyrrolidinium	C11H21N2	181.31
09001	N-methyl-N-propylpiperidinium	C9H20N	142.26
09009	N-methyl-N-butyl-piperidinium	C10H22N	156.29
11001	N-butyl pyridinium	C9H14N	136.22
11002	N-hexyl pyridinium	C11H18N	164.27
11003	N-octyl pyridinium	C13H22N	192.32
11004	N-decyl pyridinium	C15H26N	220.38
11005	N-dodecyl pyridinium	C17H30N	248.43
11009	4-Methyl-N-butylpyridinium	C10H16N	150.24
11025	Ethylpyridinium	C7H10N	108.16
11038	1-Ethyl-3-methylpyridinium	C8H12N	122.19
11041	1-Butyl-3-methylpyridinium	C10H16N	150.24
11042	1-Butyl-3,5-dimethylpyridinium	C11H18N	164.27
11047	1-Hexyl-3,5-dimethylpyridinium	C13H22N	192.32
11048	1-Hexyl-2-ethyl-3,5-dimethylpyridinium	C15H26N	220.37
11069	N-butyl-2-methylpyridinium	C10H16N	150.24
11074	3-Methyl-1-propylpyridinium	C9H14N	136.22
11077	1,3-Dimethylpyridinium	C7H10N	108.16
11079	N-methyl pyridinium	C6H8N	94.13
11080	N-propyl pyridinium	C8H12N	122.19
11085	1,2-Diethylpyridinium	C9H14N	136.22
11086	2-Ethyl-1-methylpyridinium	C8H12N	122.19
11088	1-octyl-3,5-dimethylpyridinium	C15H26N	220.38
11090	1-octyl-2,3,5-trimethylpyridinium	C16H28N	234.41
11091	1-butyl-2,3-dimethylpyridinium	C11H18N	164.27
11092	1-butyl-2-methyl-5-ethylpyridinium	C12H20N	178.3
11093	1-butyl-2,3,5-trimethylpyridinium	C12H20N	178.3
11094	1-octyl-2,3-dimethylpyridinium	C15H26N	220.38
11120	1-ethyl-3,5-dimethyl-2-pentylpyridinium	C14H24N	206.35
11121	1-butyl-3,5-dimethyl-2-pentylpyridinium	C16H28N	206.35
11122	1-hexyl-2,3,5-trimethylpyridinium	C14H24N	234.41
11123	1-hexyl-3,5-dimethyl-2-pentylpyridinium	C18H32N	206.35
14002	Tri-ethylsulfonium	C6H15S	119.25
14006	Methyldiethylsulfonium	C5H13S	105.22
15005	Trimethylpropylammonium	C6H16N	102.2
15013	Trimethyl-butylammonium	C7H18N	116.23
15014	Triethyl-methylammonium	C7H18N	116.23
15015	Ethoxymethylene-dimethyl-ethylammonium	C7H18NO	132.23
15021	Trimethyl-hexylammonium	C9H22N	144.28
15025	Trimethyl-octylammonium	C11H26N	172.33
15029	Triethyl-heptylammonium	C13H30N	200.39
15075	Tri-n-butylammonium	C12H28N	186.36
15077	Di-n-propylammonium	C6H16N	102.2
15082	Triethylammonium	C6H16N	102.2
15084	Ethylammonium	C2H8N	46.09
15086	2-Hydroxyethylammonium	C2H8NO	62.09
15094	2-hydroxyethyltrimethylammonium	C5H14NO	104.17
15123	Methylammonium	CH6N	32.06
15124	Propylammonium	C3H10N	60.12
15125	Butylammonium	C4H12N	74.14
15126	Pentylammonium	C5H14N	88.17
15127	2-Methylpropylammonium	C4H12N	74.14
15128	2-Methylbutylammoium	C5H14N	88.17
15130	2-Propanolammonium	C3H10NO	76.12
15153	Tributyl-methylammonium	C13H30N	200.38
15159	Diisopropylethylammonium	C8H20N	130.25
15160	diisopropylmethylammonium	C7H18N	116.22
15168	Tris(2-hydroxyethyl)methylammonium	C7H18O3	150.22
15173	N-methyl-2-hydroxyethylammonium	C3H10NO	76.12
15230	Diethylammonium	C4H12N	74.15
15245	Trimethylammonium	C3H10N	60.12
15255	Methoxymethylene-ethoxymethylene-dimethylammonium	C7H18NO2	148.23
15256	Methoxymethylene-ethoxyethyl-dimethylammonium	C8H20NO2	162.25
15257	Diethoxymethylene-dimethylammonium	C8H20NO2	162.25
15258	Ethoxymethylene-ethoxyethyl-ethylammonium	C9H22NO2	176.28
15259	Diethoxyethyl-dimethylammonium	C10H24NO2	190.31
15263	trimethylpentylammonium	C8H20N	130.25
15264	N-isobutyl-3-sulfopropan-1-aminium	C7H18NO3S	196.28
15265	N-isobutyl-4-sulfobutan-1-aminium	C8H20NO3S	210.31
16035	[Bis(bis-methyl-amino)-methylene]ammonium	C5H14N3	116.19
17004	Trihexyl-tetradecylphosphonium	C32H68P	483.87
17019	Tetraoctylphosphonium	C32H68P	483.87
17032	Methyl(tri-n-butyl)phosphonium	C13H30P	217.35
17034	Tributyl(ethyl)phosphonium	C14H32P	231.38
17036	1,12-Di(tripropylphosphonium)dodecane	C30H66P2	488.79
17037	(1,11-Di(tripropylphosphonium)-3,6,9-trioxaundecane	C26H58O3P2	480.68
17039	Tributyloctylphosphonium	C20H44P	315.54
28031	L-glutamic acid, 1,5-bis(1-methylethyl) ester	C11H22NO4	232.3
28035	glycine, 1-methylethyl ester	C5H12NO2	118.16
28036	glycine, 2-methylpropyl ester	C6H14NO2	132.18
28037	L-alanine, 1-methylethyl ester	C6H14NO2	132.18
28038	L-alanine, 2-methylpropyl ester	C7H16NO2	146.21
28039	L-glutamic acid, 1,5-bis(2-methylpropyl) ester	C13H26NO4	260.35
28040	L-proline, 1-methylethyl ester	C8H16NO2	158.22
28041	L-proline, 2-methylpropyl ester	C9H18NO2	172.25
28042	L-valine, 1-methylethyl ester	C8H18NO2	160.24
28043	L-valine, 2-methylpropyl ester	C9H20NO2	174.26
42001	1-Phenyl-2,3,5-trimethylpyrazolium	C12H15N2	187.26
42002	1-Phenyl-2-butyl-3,5-dimethylpyrazolium	C15H21N2	229.35
42003	1-Phenyl-3,5-dimethyl-2-pentylpyrazolium	C16H23N2	243.37
42004	1-Phenyl-3,5-dimethyl-2-hexylpyrazolium	C17H25N2	257.4
42005	1-Phenyl-3,5-dimethyl-2-heptylpyrazolium	C18H27N2	271.43

## Sheet: Table S4
Table S4 The ID code and the structure of anions and in this study.
ID Code	Name	Formula	M/g mol−1	Structure
01001	Chloride	Cl	35.45	Cl-
01002	Bromide	Br	79.9	Br-
01003	Iodine	I	126.9	I-
01005	Dichloro- iodide	Cl2I	197.81
01007	Tribromide	Br3	239.71	Br3-
02001	Tetrafluoroborate	BF4	86.8
03001	Bis((trifluoromethane)sulfonyl)amide	C2F6NO4S2	280.15
03004	Dicyanoamide	C2N3	66.04
03009	Nitrate	NO3	62	NO3-
03012	Saccharinate	C7H4NO3S	182.18
03017	Bis(fluorosulfonyl)imide	F2NO4S2	180.17
03028	Tricyanomethide	C4N3	90.06
04002	Mesylate	CH3O3S	95.1
04003	Trifluoromethanesulfonate	CF3O3S	149.07
04005	Perfluorobutylsulfonate	C4F9O3S	299.09
04007	Tosylate	C7H7O3S	171.2
04008	Octylsulfate	C8H17O4S	209.29
04017	Methylsulfate	CH3O4S	111.1
04018	Ethylsulfate	C2H5O4S	125.12
04019	2-(2-Methoxy-ethoxy)-ethylsulfate	C5H11O6S	199.2
04020	Docustate	C20H37O7S	421.57
04021	Hydrosulfate	HSO4	97.07
04030	1,1,2,2-tetrafluoroethanesulfonate	C2HO3SF4	181.08
04041	Dodecyl sulfate	C12H25O4S	265.39
04044	Benzenesulfonate	C6H5O3S	157.16
04046	Sulfobenzoate	C7H5O5S	201.17
04047	Triflouromethanesulfonate	C2H2F3O3S	163.09
05001	Hexafluorophosphate	PF6	144.96
05004	Tris(pentafluoroethyl)trifluorophosphate	C6F18P	445.01
05011	Dimethylphosphate	C2H6O4P	125.04
05012	Diethylphosphate	C4H10PO4	153.09
05015	Methylphosphonate	CH4PO3	95.01
05029	Bis(2,4,4-trimethylpentyl)phosphinate	C16H34PO2	289.42
06001	Trifluoroacetate	C2F3O2	113.02
06003	Acetate	C2H3O2	59.04
06005	Formate	CHO2	45.02
06006	Decanoate	C10H19O2	171.26
06007	DL-lactate	C3H5O3	89.07
06008	L-lactate	C3H5O3	89.07
06009	Glycine	C2H4NO2	74.06
06010	Alanine	C3H6NO2	88.09
06014	Serine	C3H6NO3	104.08
06019	Glutamate	C5H8NO4	146.12
06025	Proline	C5H8NO2	114.12
06032	Propionate	C3H5O2	73.07
06033	Butyrate	C4H7O2	87.1
06034	Glycolate	C2H3O3	75.04
06038	Hydrogenebisfluoride	HF2	39	HF2-
06039	Octanoate	C8H15O2	143.2
06043	Isobutyrate	C4H7O2	87.1
06044	Pentanoate	C5H9O2	101.12
15003	Thiocyanate	SCN	58.08
15005	Tetracyanoborate	BC4N4	114.88
19001	Phenolate	C6H5O	93.11
19002	Methylphenolate	C7H7O	107.13
19003	Methoxyphenolate	C7H7O2	123.13
19004	Fluorophenolate	C6H4FO	111.1

## Sheet: Table S5
Table S5 The group contribution parameters in Eq 7.
No	Fragments	Parameters	Value
Cation fragments
1	im	a1	8.1364×10-2
2	pyr	a2	6.7310×10-2
3	py	a3	1.0530×10-1
4	pip	a4	7.7671×10-2
5	N	a5	6.8719×10-2
6	P	a6	7.5958×10-2
7	gdm	a7	8.4671×10-2
8	pyrazolium	a8	7.4586×10-2
9	S	a9	7.7537×10-2
Anion fragments
10	[BF4]-	a10	-5.6623×10-2
11	[PF6]-	a11	-6.3681×10-2
12	[Cl]- or Cl	a12	2.4135×10-2
13	[Br]- or Br	a13	2.9698×10-2
14	[I]- or I	a14	9.3661×10-2
15	[NO3]-	a15	-1.6494×10-2
16	–CN	a16	1.6855×10-2
17	–SO2–	a17	1.2404×10-5
18	–P=O	a18	-1.7770×10-3
19	pyrrolidine ring	a19	2.3402×10-2
20		a20	4.2141×10-2
Substituent fragments
21	–CH3	a21	2.3879×10-2
22	–CH2–	a22	-2.2891×10-4
23	＞CH– or [–CH–]-	a23	-3.5397×10-3
24	＞C＜ or [＞C–]-	a24	-1.0550×10-2
25	=CH2	a25	1.0562×10-2
26	＝CH–	a26	9.1531×10-3
27	＝C＜	a27	-1.8781×10-3
28	–H(ring)	a28	7.3222×10-4
29	–O– or [–O]-	a29	-1.2964×10-4
30	＝O	a30	-3.5398×10-3
31	–OH	a31	1.1016×10-2
32	–H(non-ring)	a32	-1.7862×10-3
33	–S or [–S–]-	a33	4.9243×10-2
34	benzene ring	a34	4.0060×10-2
35	[–N–]- or ＞N–	a35	-1.2261×10-2
36	–NH2	a36	3.8793×10-2
37	C=O	a37	-2.8563×10-3
38	–CF2–	a38	-1.9138×10-2
39	–CF3	a39	-1.9998×10-2
40	–F	a40	-1.2007×10-2
41	B	a41	-9.7248×10-2
im = Imidazolium, pyr = Pyrrolidinium, py = Pyridinium, pip = Piperidinium, N = Ammonium, P = Phosphonium, gdm = Guanidinium, S = Sulfonium

## Sheet: Table S6
Table S6 The refractive index of new ILs at 298.15 K projected by GC-ANN and GC Method.
No.	ILs					AARD
		GC	GC-ANN			GC	GC-ANN
1	[IM][TFSI]	1.4236	1.4137		－	－	－
2	[IM][C7CO2]	1.4736	1.4966		－	－	－
3	[C1IM][NO3]	1.4626	1.3928		－	－	－
4	[C2IM][PF6]	1.4145	1.516		－	－	－
5	[C1MIM][dca]	1.5007	1.4082		－	－	－
6	[DMIM][BF4]	1.4236	1.4906		－	－	－
7	[BMIM][mesy]	1.4781	1.5426		－	－	－
8	[BMIM][Tos]	1.519	1.4936		－	－	－
9	[BMIM][HSO4]	1.4864	1.5411		－	－	－
10	[BMIM][SCN]	1.5445	1.4692		－	－	－
11	[C5MIm][MeSO4]	1.478	1.4873		－	－	－
12	[C6MIM][Ala]	1.511	1.4012		－	－	－
13	[BenMIM][TFSI]	1.4295	1.5039		－	－	－
14	[C8MIM][dca]	1.496	1.4368		－	－	－
15	[C14MIM][PF6]	1.4108	1.4451		－	－	－
16	[C18MIM][TFSI]	1.4208	1.4797		－	－	－
17	[C2CNBIM][DOSS]	1.4788	1.498		－	－	－
18	[C3C3IM][HSO4]	1.4893	1.417		－	－	－
19	[EDMIM]Br	1.5116	1.3527		－	－	－
20	[P11][NfO]	1.4325	1.4184		－	－	－
21	[P12][mesy]	1.4721	1.3807		－	－	－
22	[P13][FSI]	1.4348	1.4302		－	－	－
23	[P14][Tos]	1.5126	1.3892		－	－	－
24	[AMPyrr][TFSI]	1.4339	1.4529		－	－	－
25	[PP13][FSI]	1.4467	1.4145		－	－	－
26	[PP1,1O2][TFSI]	1.4297	1.5848		－	－	－
27	[Pip1,4][dca]	1.5024	1.4459		－	－	－
28	[PIP15][TFSI]	1.4292	1.4544		－	－	－
29	[bpy][CF3SO3]	1.4834	1.5052		－	－	－
30	[Opy]Cl	1.5263	1.5315		－	－	－
31	[C12py][PF6]	1.4374	1.4146		－	－	－
32	[empy][NfO]	1.467	1.5244		－	－	－
33	[B3M5MPYR][SCN]	1.5749	1.462		－	－	－
34	[ompy][BF4]	1.4472	1.4753		－	－	－
35	[M1,4Py][TOS]	1.548	1.504		－	－	－
36	[S111][dca]	1.4974	1.4345		－	－	－
37	[S444][TFSI]	1.4224	1.4018		－	－	－
38	[N1112][TFSI]	1.4176	1.4763		－	－	－
39	[N1122][OAc]	1.4686	1.6077		－	－	－
40	[N1114][C8SO4]	1.4698	1.417		－	－	－
41	[N7111][TFSI]	1.4164	1.5967		－	－	－
42	[N4444][HSO4]	1.4776	1.4831		－	－	－
43	[N4444][CF3COO]	1.4454	1.3859		－	－	－
44	[NHHH,(CH2)2OH][MeSO4]	1.4676	1.5374		－	－	－
45	[N1155]I	1.5644	1.5531		－	－	－
46	[Chol][Ala]	1.5132	1.3523		－	－	－
47	[TEA][TFSI]	1.4133	1.4579		－	－	－
48	[HPA][OAc]	1.4643	1.4826		－	－	－
49	[N1,1,1O2,1O2][OAc]	1.4683	1.6323		－	－	－
50	[[(CH3)2N]2C=NH2][CF3COO]	1.4599	1.4442		－	－	－
51	[P4442][BF4]	1.419	1.4925		－	－	－
52	[P4448][CF3COO]	1.4521	1.4754		－	－	－
53	[DMGly][HSO4]	1.48	1.5474		－	－	－
54	[C2py][DCA]	1.5267	1.5453		1.5463 152	1.2702	0.0695
55	[C3py][DCA]	1.5264	1.543		1.5407 152	0.926	0.2973
56	[C4py][DCA]	1.5262	1.5407		1.5345 152	0.5404	0.5565
57	[C5py][DCA]	1.526	1.5381		1.5300 152	0.2626	0.6963
58	[C6py][DCA]	1.5258	1.5105		1.5267 152	0.0619	0.7483
59	[C3MIM][Ser]	1.5182	1.5108		1.5179 153	0.0168	0.4881
60	[BMIM][Ser]	1.5179	1.4137		1.5143 153	0.2397	0.2302

## Sheet: Reference
No.	Referencce
1	J. Chen, L. Chen, Y. Lu and Y. Xu, Journal of Molecular Liquids, 2014, 197, 374-380.
2	A. Berthod, M. Ruiz-Angel and S. Carda-Broch, J. Chromatogr. A, 2008, 1184, 6-18.
3	T. Buffeteau, J. Grondin, Y. Danten and J.-C. Lassegues, J. Phys. Chem. B, 2010, 114, 7587-7592.
4	H. Shekaari and S. S. Mousavi, Fluid Phase Equilib., 2010, 291, 201-207.
5	A. B. Pereiro, F. Santamarta, E. Tojo, A. Rodriguez and J. Tojo, J. Chem. Eng. Data, 2006, 51, 952-954.
6	X.-J. Yan, S.-N. Li, Q.-G. Zhai, Y.-C. Jiang and M.-C. Hu, Journal of Chemical and Engineering Data, 2014, 59, 1411-1422.
7	S. Zhang, X. Hu, C. Qu, Q. Zhang, X. Ma, L. Lu, X. Li, X. Zhang and Y. Deng, Chemphyschem, 2010, 11, 2327-2331.
8	M. Shamsipur, A. A. M. Beigi, M. Teymouri, S. M. Pourmortazavi and M. Irandoust, J. Mol. Liq., 2010, 157, 43-50.
9	M. Shamsipur, A. A. M. Beigi, M. Teymouri, Y. Ghorbani, M. Irandoust and A. Mehdizadeh, Talanta, 2010, 81, 109-115.
10	T. Masaki, K. Nishikawa and H. Shirota, J. Phys. Chem. B, 2010, 114, 6323-6331.
11	S. Seki, S. Tsuzuki, K. Hayamizu, Y. Umebayashi, N. Serizawa, K. Takei and H. Miyashiro, J. Chem. Eng. Data, 2012, 57, 2211-2216.
12	O. Ciocirlan, O. Croitoru and O. Luliant, Journal of Chemical and Engineering Data, 2014, 59, 1165-1174.
13	K. Shimizu, M. Tariq, M. F. C. Gomes, L. P. N. Rebelo and J. N. C. Lopes, J. Phys. Chem. B, 2010, 114, 5831-5834.
14	S. Katsuta, Y. Yoshimoto, M. Okai, Y. Takeda and K. Bessho, Industrial & Engineering Chemistry Research, 2011, 50, 12735-12740.
15	Z. J. Chen and J.-M. Lee, J. Phys. Chem. B, 2014, 118, 2712-2718.
16	S. Bansal, N. Kaur, G. R. Chaudhary, S. K. Mehta and A. S. Ahluwalia, Journal of Chemical and Engineering Data, 2014, 59, 3988-3999.
17	A. A. M. Beigi, M. Abdouss, M. Yousefi, S. M. Pourmortazavi and A. Vahid, J. Mol. Liq., 2013, 177, 361-368.
18	M. G. Freire, A. R. R. Teles, M. A. A. Rocha, B. Schroeder, C. M. S. S. Neves, P. J. Carvalho, D. V. Evtuguin, L. M. N. B. F. Santos and J. A. P. Coutinho, J. Chem. Eng. Data, 2011, 56, 4813-4822.
19	T. M. Koller, S. R. Schmid, S. J. Sachnov, M. H. Rausch, P. Wasserscheid and A. P. Froeba, International Journal of Thermophysics, 2014, 35, 195-217.
20	B. Hasse, J. Lehmann, D. Assenbaum, P. Wasserscheid, A. Leipertz and A. P. Froeba, J. Chem. Eng. Data, 2009, 54, 2576-2583.
21	M. R. Shah, R. Anantharaj, T. Banerjee and G. D. Yadav, J. Chem. Thermodyn., 2013, 62, 142-150.
22	P. Bonhote, A. P. Dias, N. Papageorgiou, K. Kalyanasundaram and M. Gratzel, Inorg. Chem., 1996, 35, 1168-1178.
23	E. Vercher, F. J. Llopis, V. Gonzalez-Alfaro and A. Martinez-Andreu, J. Chem. Eng. Data, 2010, 55, 1430-1433.
24	E. Vercher, F. J. Llopis, V. Gonzalez-Alfaro, P. J. Miguel and A. Martinez-Andreu, J. Chem. Eng. Data, 2011, 56, 4499-4504.
25	P. F. Requejo, E. J. Gonzalez, E. A. Macedo and A. Dominguez, J. Chem. Thermodyn., 2014, 74, 193-200.
26	L. Alonso, A. Arce, M. Francisco and A. Soto, J. Solution Chem., 2008, 37, 1355-1363.
27	A. B. Pereiro, F. J. Deive, J. M. S. S. Esperanca and A. Rodriguez, Fluid Phase Equilib., 2010, 291, 13-17.
28	E. Gomez, B. Gonzalez, N. Calvar, E. Tojo and A. Dominguez, J. Chem. Eng. Data, 2006, 51, 2096-2102.
29	A. B. Pereiro, F. J. Deive, J. M. S. S. Esperanca and A. Rodriguez, Fluid Phase Equilib., 2010, 294, 49-53.
30	A. Arce, O. Rodriguez and A. Soto, Chem. Eng. Sci., 2006, 61, 6929-6935.
31	L. H. de Oliveira and M. Aznar, Industrial & Engineering Chemistry Research, 2010, 49, 9462-9468.
32	L. Alonso, A. Arce, M. Francisco and A. Soto, J. Chem. Eng. Data, 2010, 55, 3262-3267.
33	E. J. Gonzalez, N. Calvar, B. Gonzalez and A. Dominguez, J. Chem. Eng. Data, 2010, 55, 4931-4936.
34	E. J. Gonzalez, B. Gonzalez, N. Calvar and A. Dominguez, Fluid Phase Equilib., 2011, 305, 227-232.
35	E. J. Gonzalez, N. Calvar, E. Gomez and A. Dominguez, Fluid Phase Equilib., 2011, 303, 174-179.
36	E. J. Gonzalez, N. Calvar, I. Dominguez and A. Dominguez, J. Chem. Thermodyn., 2011, 43, 562-568.
37	L. H. de Oliveira and M. Aznar, Industrial & Engineering Chemistry Research, 2011, 50, 2289-2295.
38	L. H. de Oliveira and M. Aznar, J. Chem. Eng. Data, 2011, 56, 2005-2012.
39	M. Larriba, S. Garcia, J. Garcia, J. S. Torrecilla and F. Rodriguez, J. Chem. Eng. Data, 2011, 56, 3589-3597.
40	G. Reyes, M. Cartes, C. Rey-Castro, H. Segura and A. Mejia, J. Chem. Eng. Data, 2013, 58, 1203-1211.
41	A. N. Soriano, B. T. Doma, Jr. and M.-H. Li, J. Chem. Thermodyn., 2008, 40, 1654-1660.
42	I. Bahadur, B. B. Govender, K. Osman, M. D. Williams-Wynn, W. M. Nelson, P. Naidoo and D. Ramjugernath, J. Chem. Thermodyn., 2014, 70, 245-252.
43	J. Vitz, N. P. Yevlampieva, E. Rjumtsev and U. S. Schubert, Carbohydr. Polym., 2010, 82, 1046-1053.
44	H. F. D. Almeida, H. Passos, J. A. Lopes-da-Silva, A. M. Fernandes, M. G. Freire and J. A. P. Coutinho, J. Chem. Eng. Data, 2012, 57, 3005-3013.
45	J. M. M. Araujo, A. B. Pereiro, F. Alves, I. M. Marrucho and L. P. N. Rebelo, J. Chem. Thermodyn., 2013, 57, 1-8.
46	S. Lago, H. Rodriguez, A. Arce and A. Soto, Fluid Phase Equilib., 2014, 361, 37-44.
47	N. Muhammad, Z. B. Man, M. A. Bustam, M. I. A. Mutalib, C. D. Wilfred and S. Rafiq, J. Chem. Eng. Data, 2011, 56, 3157-3162.
48	W.-G. Xu, L. Li, X.-X. Ma, J. Wei, W.-B. Duan, W. Guan and J.-Z. Yang, J. Chem. Eng. Data, 2012, 57, 2177-2184.
49	I. Dominguez, E. J. Gonzalez, R. Gonzalez and A. Dominguez, J. Chem. Eng. Data, 2011, 56, 3376-3383.
50	E. Gomez, N. Calvar, E. A. Macedo and A. Dominguez, J. Chem. Thermodyn., 2012, 45, 9-15.
51	S. Corderi, B. Gonzalez, N. Calvar and E. Gomez, Fluid Phase Equilib., 2013, 337, 11-17.
52	H. Shekaari and E. Armanfar, J. Chem. Eng. Data, 2010, 55, 765-772.
53	M. Teodorescu, Industrial & Engineering Chemistry Research, 2014, 53, 13522-13528.
54	J. G. Huddleston, A. E. Visser, W. M. Reichert, H. D. Willauer, G. A. Broker and R. D. Rogers, Green Chemistry, 2001, 3, 156-164.
55	A. Bagno, C. Butts, C. Chiappe, F. D'Amico, J. C. D. Lord, D. Pieraccini and F. Rastrelli, Organic & Biomolecular Chemistry, 2005, 3, 1624-1630.
56	A. N. Soriano, B. T. Doma, Jr. and M.-H. Li, J. Chem. Thermodyn., 2009, 41, 301-307.
57	M. A. Iglesias-Otero, J. Troncoso, E. Carballo and L. Romani, J. Solution Chem., 2007, 36, 1219-1230.
58	Y. Min, M. Akbulut, J. R. Sangoro, F. Kremer, R. K. Prud'homme and J. Israelachvili, Journal of Physical Chemistry C, 2009, 113, 16445-16449.
59	T. Singh, A. Kumar, M. Kaur, G. Kaur and H. Kumar, J. Chem. Thermodyn., 2009, 41, 717-723.
60	Q. Zhang, X. Ma, S. Liu, B. Yang, L. Lu, Y. He and Y. Deng, J. Mater. Chem., 2011, 21, 6864-6868.
61	M. M. Taib and T. Murugesan, J. Chem. Eng. Data, 2012, 57, 120-126.
62	G. Perez-Sanchez, J. Troncoso, P. Losada-Perez, P. Mendez-Castro and L. Romani, J. Chem. Thermodyn., 2013, 65, 131-137.
63	M. M. Taib, M. M. Akbar and T. Murugesan, Journal of Molecular Liquids, 2014, 190, 23-29.
64	G. R. Chaudhary, S. Bansal, S. K. Mehta and A. S. Ahluwalia, Journal of Solution Chemistry, 2014, 43, 340-359.
65	A. E. Andreatta, A. Arce, E. Rodil and A. Soto, J. Solution Chem., 2010, 39, 371-383.
66	J. L. Anderson, D. W. Armstrong and G. T. Wei, Anal. Chem., 2006, 78, 2892-2902.
67	M. Geppert-Rybczynska and M. Sitarek, Journal of Chemical and Engineering Data, 2014, 59, 1213-1224.
68	E. J. Gonzalez, A. Dominguez and E. A. Macedo, J. Chem. Eng. Data, 2012, 57, 2165-2176.
69	S. Singh, M. Aznar and N. Deenadayalu, J. Chem. Thermodyn., 2013, 57, 238-247.
70	I. Dominguez, N. Calvar, E. Gomez and A. Dominguez, J. Chem. Eng. Data, 2013, 58, 189-196.
71	I. Dominguez, N. Calvar, E. Gomez and A. Dominguez, J. Chem. Thermodyn., 2011, 43, 705-710.
72	Z. Y. Gu and J. F. Brennecke, J. Chem. Eng. Data, 2002, 47, 339-345.
73	A. B. Pereiro and A. Rodriguez, J. Chem. Thermodyn., 2007, 39, 978-989.
74	M. T. Zafarani-Moattar and R. Majdan-Cegincara, J. Chem. Eng. Data, 2007, 52, 2359-2364.
75	A. Pal, R. Gaba, T. Singh and A. Kumar, J. Mol. Liq., 2010, 154, 41-46.
76	T. Singh and A. Kumar, J. Mol. Liq., 2010, 153, 117-123.
77	Y. Xu, B. Chen, W. Qian and H. Li, J. Chem. Thermodyn., 2013, 58, 449-459.
78	Z. Yu, H. Gao, H. Wang and L. Chen, J. Chem. Eng. Data, 2011, 56, 4295-4300.
79	Z. Yu, H. Gao, H. Wang and L. Chen, J. Chem. Eng. Data, 2011, 56, 2877-2883.
80	D.-W. Fang, Q. Yan, D. Li, L.-X. Xia and S.-L. Zang, J. Chem. Thermodyn., 2014, 79, 12-18.
81	S. P. Ijardar and N. I. Malek, J. Chem. Thermodyn., 2014, 71, 236-248.
82	M. Tariq, P. A. S. Forte, M. F. C. Gomes, J. N. C. Lopes and L. P. N. Rebelo, J. Chem. Thermodyn., 2009, 41, 790-798.
83	N. M. Yunus, M. I. A. Mutalib, Z. Man, M. A. Bustam and T. Murugesan, J. Chem. Thermodyn., 2010, 42, 491-495.
84	M. H. Rausch, A. Heller, J. Herbst, T. M. Koller, M. Bahlmann, P. S. Schulz, P. Wasserscheid and A. P. Froeba, J. Phys. Chem. B, 2014, 118, 4636-4646.
85	A. B. Pereiro and A. Rodriguez, Fluid Phase Equilib., 2008, 270, 23-29.
86	M. S. AlTuwaim, K. H. A. E. Alkhaldi, A. S. Al-Jimaz and A. A. Mohammad, Journal of Chemical and Engineering Data, 2014, 59, 1955-1963.
87	N. I. Malek, A. Singh, R. Surati and S. P. Ijardar, J. Chem. Thermodyn., 2014, 74, 103-118.
88	F. J. Deive, M. A. Rivas and A. Rodriguez, J. Chem. Thermodyn., 2011, 43, 487-491.
89	L. Alonso, A. Arce, M. Francisco and A. Soto, J. Chem. Eng. Data, 2008, 53, 1750-1755.
90	A. E. Andreatta, A. Arce, E. Rodil and A. Soto, J. Chem. Eng. Data, 2009, 54, 1022-1028.
91	H. Zhang, J. Wu, J. Zhang and J. S. He, Macromolecules, 2005, 38, 8272-8277.
92	S. M. Murray, T. K. Zimlich, A. Mirjafari, R. A. O'Brien, J. H. Davis, Jr. and K. N. West, J. Chem. Eng. Data, 2013, 58, 1516-1522.
93	N. Muhammad, Z. Man, A. K. Ziyada, M. A. Bustam, M. I. A. Mutalib, C. D. Wilfred, S. Rafiq and I. M. Tan, J. Chem. Eng. Data, 2012, 57, 737-743.
94	A. K. Ziyada, C. D. Wilfred, M. A. Bustam, Z. Man and T. Murugesan, J. Chem. Eng. Data, 2010, 55, 3886-3890.
95	A. K. Ziyada, M. A. Bustam, T. Murugesan and C. D. Wilfred, New J. Chem., 2011, 35, 1111-1116.
96	A. K. Ziyada and C. D. Wilfred, Journal of Chemical and Engineering Data, 2014, 59, 1232-1239.
97	A. K. Ziyada, M. A. Bustam, C. D. Wilfred and T. Murugesan, J. Chem. Eng. Data, 2011, 56, 2343-2348.
98	A. K. Ziyada and C. D. Wilfred, Journal of Chemical and Engineering Data, 2014, 59, 1385-1390.
99	M. I. Hossain, M.-R. Babaa, M. El-Harbawi, Z. Man, G. Hefter and C.-Y. Yin, J. Chem. Eng. Data, 2011, 56, 4188-4193.
100	B. Gonzalez and E. J. Gonzalez, J. Chem. Thermodyn., 2014, 68, 109-116.
101	E. J. Gonzalez, B. Gonzalez and E. A. Macedo, J. Chem. Eng. Data, 2013, 58, 1440-1448.
102	M. Anouti, M. Caillon-Caravanier, Y. Dridi, J. Jacquemin, C. Hardacre and D. Lemordant, J. Chem. Thermodyn., 2009, 41, 799-808.
103	M. Anouti, A. Vigeant, J. Jacquemin, C. Brigouleix and D. Lemordant, J. Chem. Thermodyn., 2010, 42, 834-845.
104	P. Nockemann, M. Pellens, K. Van Hecke, L. Van Meervelt, J. Wouters, B. Thijs, E. Vanecht, T. N. Parac-Vogt, H. Mehdi, S. Schaltin, J. Fransaer, S. Zahn, B. Kirchner and K. Binnemans, Chemistry-a European Journal, 2010, 16, 1849-1858.
105	A. Bhattacharjee, P. J. Carvalho and J. A. P. Coutinho, Fluid Phase Equilib., 2014, 375, 80-88.
106	M. Larriba, S. Garcia, P. Navarro, J. Garcia and F. Rodriguez, J. Chem. Eng. Data, 2013, 58, 1496-1504.
107	F. Espiau, J. Ortega, L. Fernandez and J. Wisniak, Industrial & Engineering Chemistry Research, 2011, 50, 12259-12270.
108	M. Larriba, S. Garcia, P. Navarro, J. Garcia and F. Rodriguez, J. Chem. Eng. Data, 2012, 57, 1318-1325.
109	N. Papaiconomou, J. Estager, Y. Traore, P. Bauduin, C. Bas, S. Legeai, S. Viboud and M. Draye, J. Chem. Eng. Data, 2010, 55, 1971-1979.
110	J. Benito, M. Garcia-Mardones, V. Perez-Gregorio, I. Gascon and C. Lafuente, Journal of Solution Chemistry, 2014, 43, 696-710.
111	E. Gomez, I. Dominguez, N. Calvar and A. Dominguez, J. Chem. Thermodyn., 2010, 42, 1234-1239.
112	B. Gonzalez, N. Calvar, E. Gomez, I. Dominguez and A. Dominguez, J. Chem. Eng. Data, 2009, 54, 1353-1358.
113	B. Gonzalez, S. Corderi and A. G. Santamaria, J. Chem. Thermodyn., 2013, 60, 9-14.
114	E. J. Gonzalez, B. Gonzalez, N. Calvar and A. Dominguez, Fluid Phase Equilib., 2010, 295, 249-254.
115	E. J. Gonzalez, I. Dominguez, B. Gonzalez and J. Canosa, Fluid Phase Equilib., 2010, 296, 213-218.
116	E. J. Gonzalez, N. Calvar, B. Gonzalez and A. Dominguez, Fluid Phase Equilib., 2010, 291, 59-65.
117	E. J. Gonzalez, N. Calvar, B. Gonzalez and A. Dominguez, J. Chem. Thermodyn., 2010, 42, 752-757.
118	E. J. Gonzalez, N. Calvar, B. Gonzalez and A. Dominguez, J. Chem. Eng. Data, 2010, 55, 633-638.
119	E. J. Gonzalez, N. Calvar, E. Gomez and A. Dominguez, J. Chem. Thermodyn., 2010, 42, 104-109.
120	E. J. Gonzalez, N. Calvar, J. Canosa and A. Dominguez, J. Chem. Eng. Data, 2010, 55, 2289-2293.
121	B. Gonzalez, N. Calvar, E. Gomez, E. A. Macedo and A. Dominguez, J. Chem. Eng. Data, 2008, 53, 1824-1828.
122	M. Francisco, A. Arce and A. Soto, Fluid Phase Equilib., 2010, 294, 39-48.
123	A. Arce, M. Francisco and A. Soto, J. Chem. Thermodyn., 2010, 42, 712-718.
124	P. Verdia, M. Hernaiz, E. J. Gonzalez, E. A. Macedo, J. Salgado and E. Tojo, J. Chem. Thermodyn., 2014, 69, 19-26.
125	A. Navas, J. Ortega, R. Vreekamp, E. Marrero and J. Palomar, Industrial & Engineering Chemistry Research, 2009, 48, 2678-2690.
126	I. Bandres, G. Pera, S. Martin, M. Castro and C. Lafuente, J. Phys. Chem. B, 2009, 113, 11936-11942.
127	E. Gomez, N. Calvar, A. Dominguez and E. A. Macedo, J. Chem. Thermodyn., 2010, 42, 1324-1329.
128	M. Garcia-Mardones, S. Martin, I. Gascon and C. Lafuente, Journal of Chemical and Engineering Data, 2014, 59, 1564-1573.
129	I. Bandres, M. Carmen Lopez, M. Castro, J. Barbera and C. Lafuente, J. Chem. Thermodyn., 2012, 44, 148-153.
130	A. Bhattacharjee, A. Luis, J. H. Santos, J. A. Lopes-da-Silva, M. G. Freire, P. J. Carvalho and J. A. P. Coutinho, Fluid Phase Equilibria, 2014, 381, 36-45.
131	S. Seki, S. Tsuzuki, K. Hayamizu, N. Serizawa, S. Ono, K. Takei, H. Doi and Y. Umebayashi, J. Phys. Chem. B, 2014, 118, 4590-4599.
132	Z. Chen, S. Liu, Z. Li, Q. Zhang and Y. Deng, New J. Chem., 2011, 35, 1596-1606.
133	K. Machanova, A. Boisset, Z. Sedlakova, M. Anouti, M. Bendova and J. Jacquemin, J. Chem. Eng. Data, 2012, 57, 2227-2235.
134	R. Umapathi, P. Attri and P. Venkatesu, J. Phys. Chem. B, 2014, 118, 5971-5982.
135	T. L. Greaves, A. Weerawardena, C. Fong, I. Krodkiewska and C. J. Drummond, J. Phys. Chem. B, 2006, 110, 22479-22487.
136	M. Hou, Y. Xu, Y. Han, B. Chen, W. Zhang, Q. Ye and J. Sun, J. Mol. Liq., 2013, 178, 149-155.
137	K. A. Kurnia, M. M. Taib, M. I. A. Mutalib and T. Murugesan, J. Mol. Liq., 2011, 159, 211-219.
138	G. R. Chaudhary, S. Bansal, S. K. Mehta and A. S. Ahluwalia, J. Chem. Thermodyn., 2014, 76, 134-144.
139	D.-J. Tao, Z. Cheng, F.-F. Chen, Z.-M. Li, N. Hu and X.-S. Chen, J. Chem. Eng. Data, 2013, 58, 1542-1548.
140	M. Anouti, M. Caillon-Caravanier, C. Le Floch and D. Lemordant, J. Phys. Chem. B, 2008, 112, 9406-9411.
141	A. Arce, A. Soto, J. Ortega and G. Sabater, J. Chem. Thermodyn., 2009, 41, 235-242.
142	V. H. Alvarez, N. Dosil, R. Gonzalez-Cabaleiro, S. Mattedi, M. Martin-Pastor, M. Iglesias and J. M. Navaza, J. Chem. Eng. Data, 2010, 55, 625-632.
143	V. H. Alvarez, S. Mattedi and M. Aznar, J. Chem. Thermodyn., 2013, 62, 130-141.
144	Y. Meng, J. Liu, Z. Li and H. Wei, Journal of Chemical and Engineering Data, 2014, 59, 2186-2195.
145	D.-J. Tao, W.-J. Hu, F.-F. Chen, X.-S. Chen, X.-L. Zhang and Y. Zhou, Journal of Chemical and Engineering Data, 2014, 59, 4031-4038.
146	Z. S. Breitbach and D. W. Armstrong, Analytical and Bioanalytical Chemistry, 2008, 390, 1605-1617.
147	H. F. D. Almeida, J. A. Lopes-da-Silva, M. G. Freire and J. A. P. Coutinho, J. Chem. Thermodyn., 2013, 57, 372-379.
148	I.-C. Hwang, R.-H. Kwon and S.-J. Park, Fluid Phase Equilib., 2013, 344, 32-37.
149	F. J. Deive, M. A. Rivas and A. Rodriguez, J. Chem. Thermodyn., 2013, 62, 98-103.
150	T. J. Trivedi, P. Bharmoria, T. Singh and A. Kumar, J. Chem. Eng. Data, 2012, 57, 317-323.
151	M. C. Ozdemir and B. Ozgun, Journal of Molecular Liquids, 2014, 200, 129-135.
152	X.-X. Ma, J. Wei, W. Guan, Y. Pan, L. Zheng, Y. Wu and J.-Z. Yang, J. Chem. Thermodyn., 2015, 89, 51-59.
153	J. Wei, C. Chang, Y. Zhang, S. Hou, D. Fang and W. Guan, J. Chem. Thermodyn., 2015, 90, 310-316.
